# Supplementary material for: Structural Diversity of Mercury(II) Halide Complexes Containing Bis-pyridyl-bis-amide with Bulky and Angular Backbones: Ligand Effect and Metal Sensing
Source: MDPI journal article supplement (doi:10.3390/ijms23147861), 2022-07-16
Supplement: s1 [file s1]

## Supplementary Materials

# Structural Diversity of Mercury(II) Halide Complexes Containing Bis-pyridyl-bis-amide with Bulky and Angular Backbones: Ligand Effect and Metal Sensing

Manivannan Govindaraj <sup>1</sup>, Wei-Chun Huang <sup>1</sup>, Chia-Yi Lee <sup>1</sup>, Venkatesan Lakshmanan <sup>1</sup>, Yu-Hsiang Liu <sup>1</sup>, Pamela Berilyn So <sup>2</sup>, Chia-Her Lin <sup>2,\*</sup> and Jhy-Der Chen <sup>1,\*</sup>

<sup>1</sup> Department of Chemistry, Chung-Yuan Christian University, Chung Li, Taoyuan 320, Taiwan;  
manivannanjent@gmail.com (M.G.); learn122568@gmail.com (W.-C.H.);  
miss10031031@gmail.com (C.-Y.L.); flower95@gmail.com (V.L.);  
g10963021@cycu.edu.tw (Y.-H.L.)

<sup>2</sup> Department of Chemistry, National Taiwan Normal University, Taipei 106, Taiwan; pbtuso@gmail.com

\* Correspondence: chiaher@ntnu.edu.tw (C.-H.L.); jdchen@cycu.edu.tw (J.-D.C.);  
Tel.: +886-3-265-3351 (J.-D.C.)

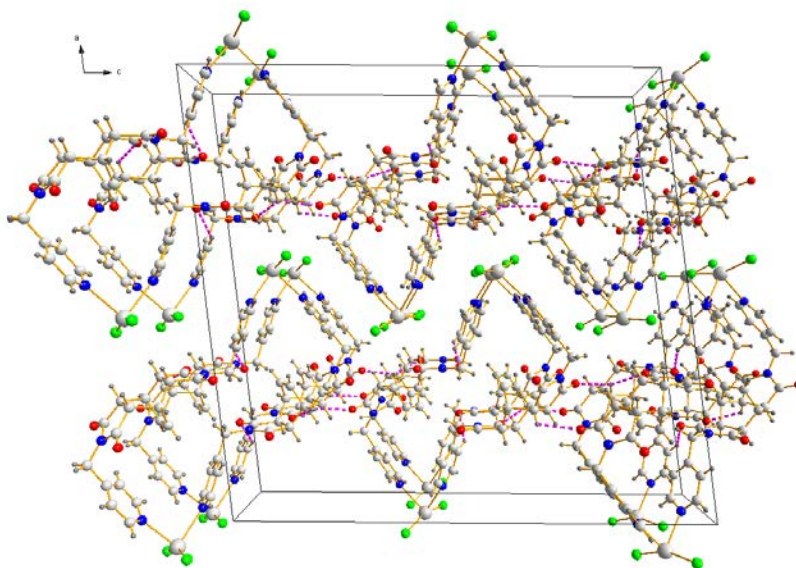

**Figure S1.** Packing diagram for **4**.

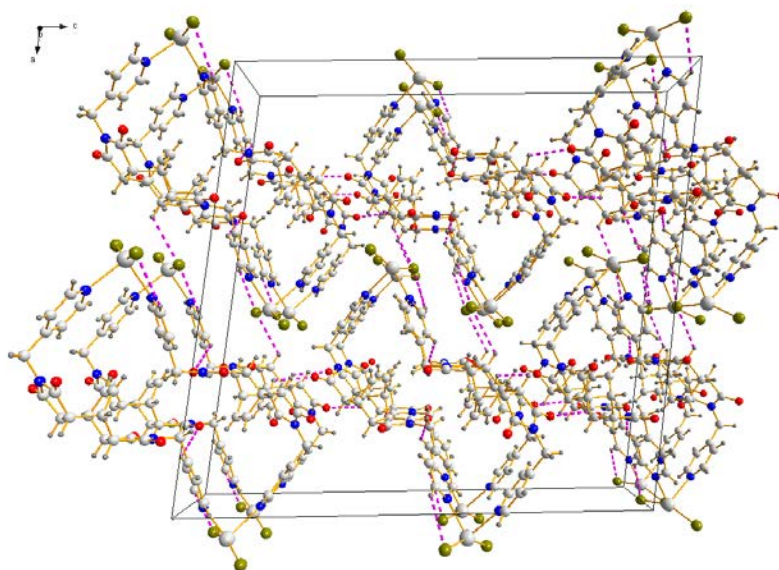

**Figure S2.** Packing diagram for **5**.

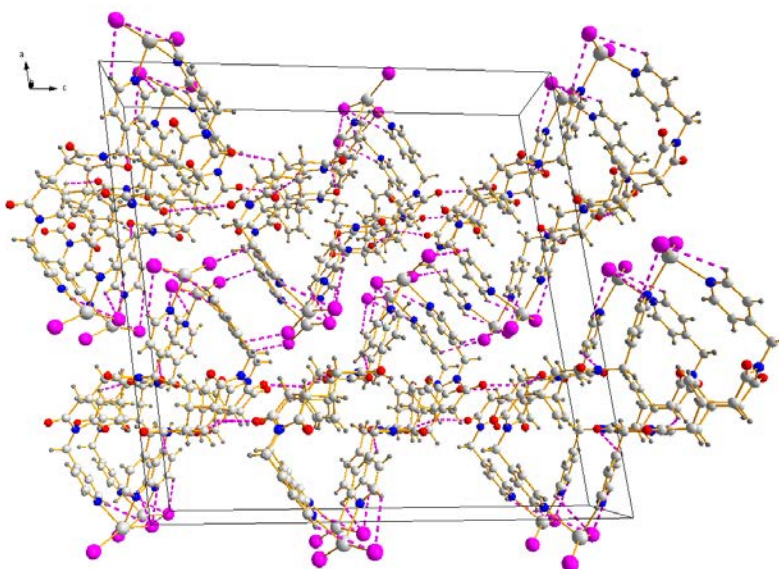

**Figure S3.** Packing diagram for **6**.

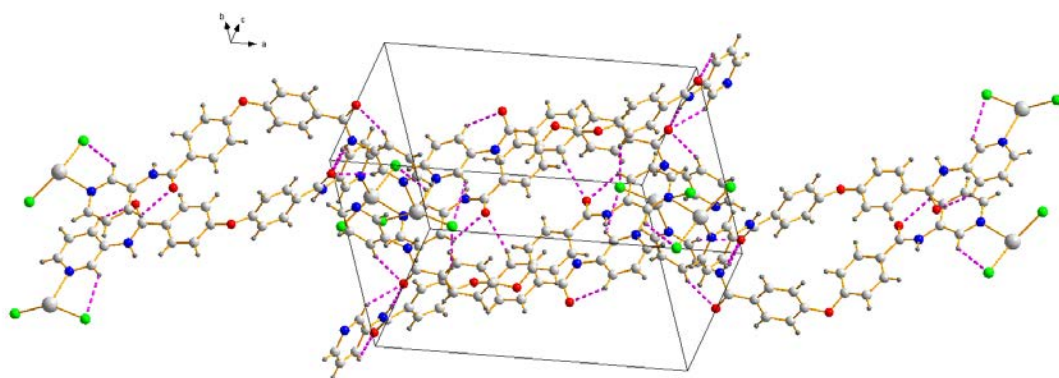

**Figure S4.** Packing diagram of **7**.

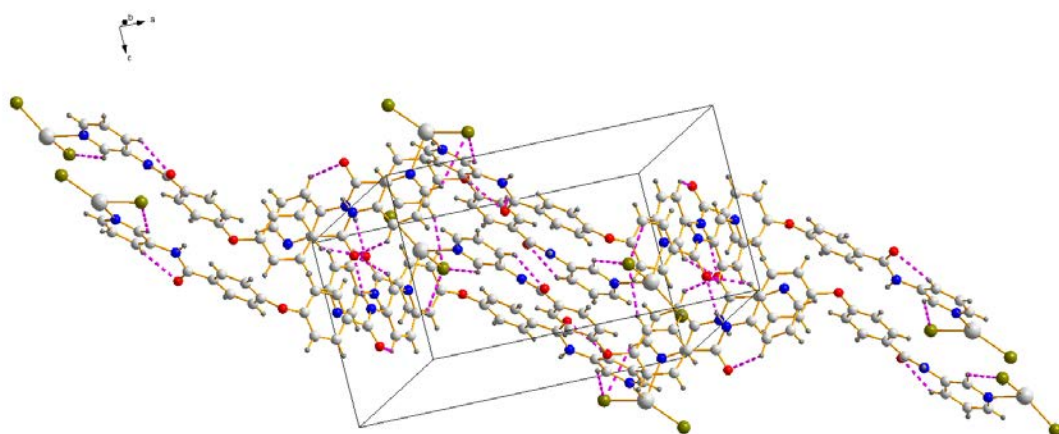

**Figure S5.** Packing diagram of **8**.

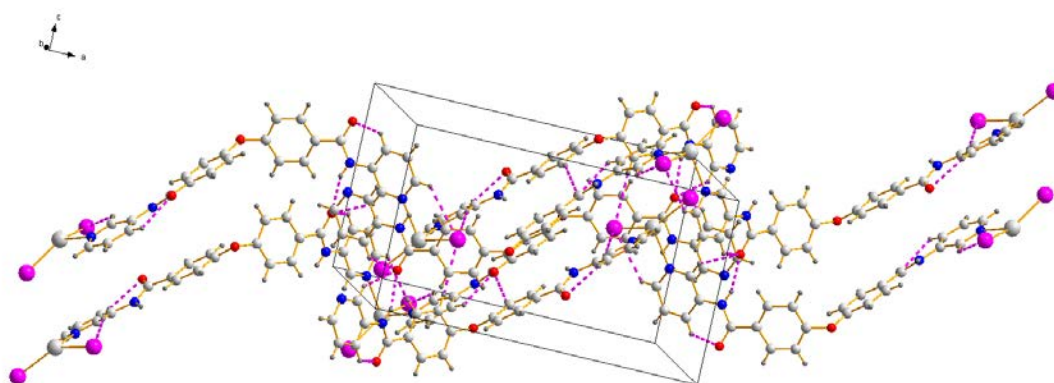

**Figure S6.** Packing diagram of **9**.

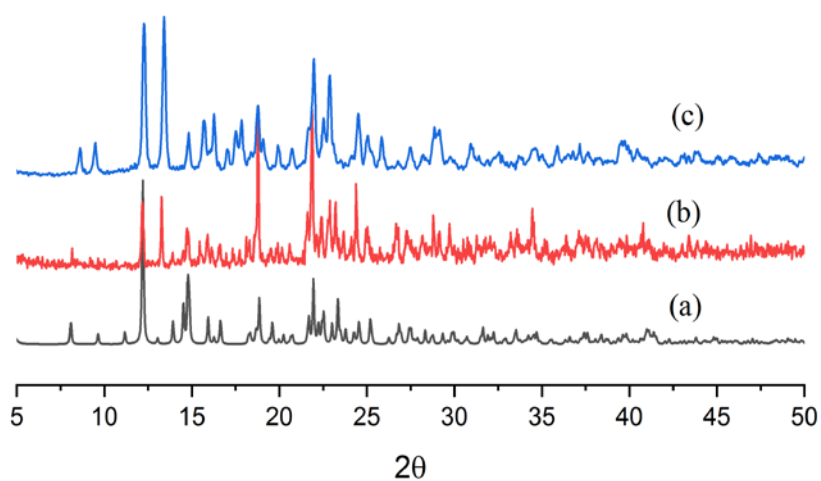

**Figure S7.** PXRD patterns of **7**. (a) simulated, (b) as synthesized by hydrothermal reaction and (c) as-synthesized by mechanochemical grinding.

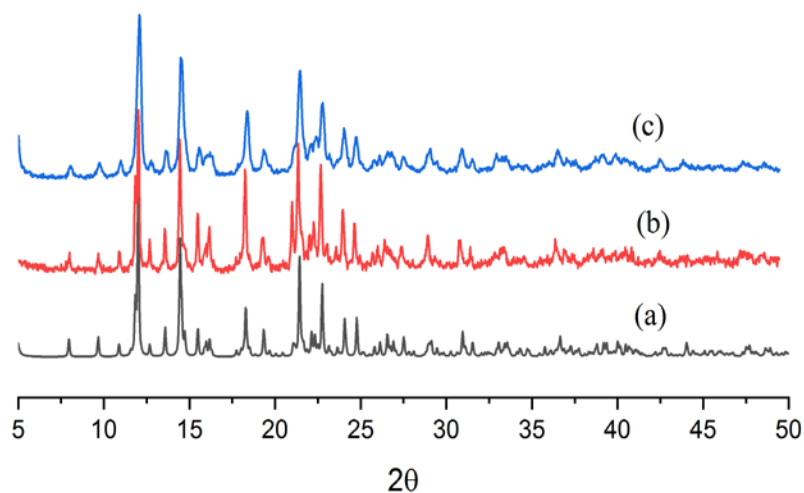

**Figure S8.** PXRd patterns of **8**. (a) simulated, (b) as synthesized by hydrothermal reaction and (c) as-synthesized by mechanochemical grinding.

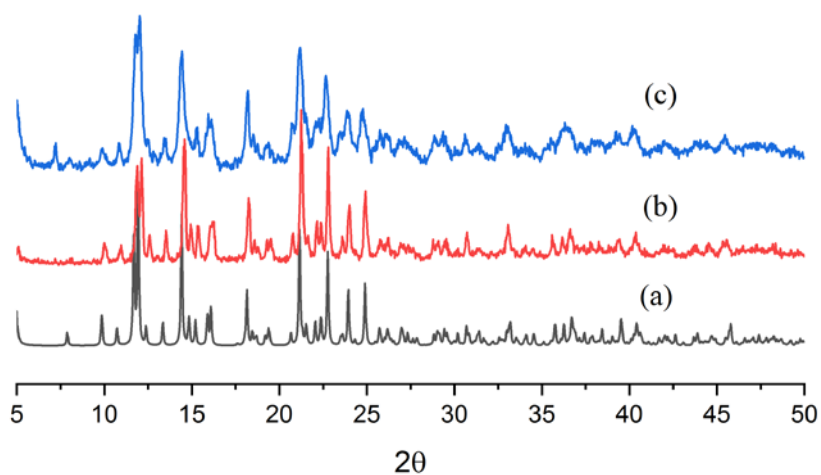

**Figure S9.** PXRd patterns of **9**. (a) simulated, (b) as synthesized by hydrothermal reaction and (c) as-synthesized by mechanochemical grinding.

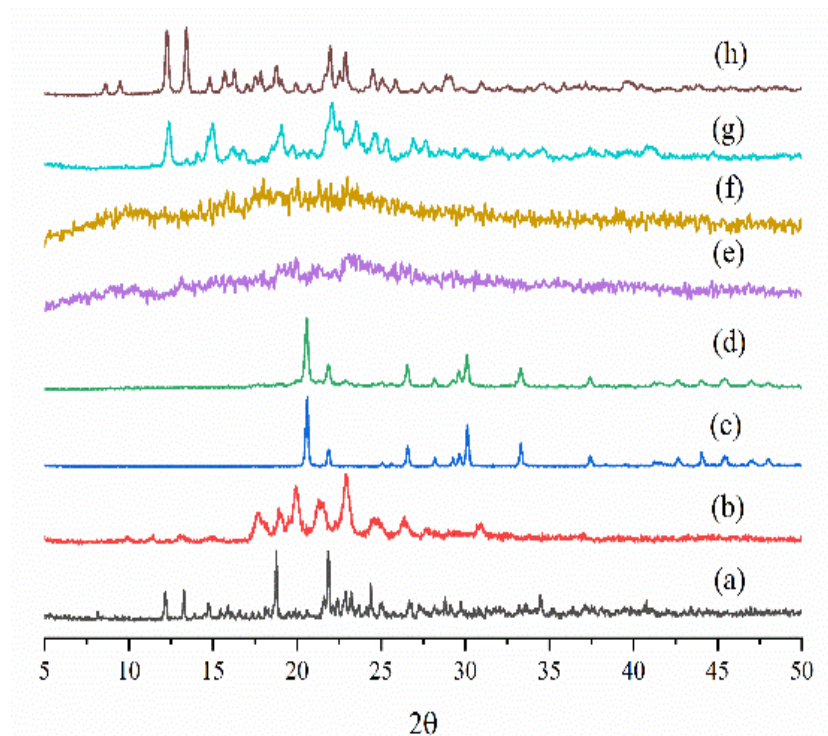

**Figure S10.** PXRD patterns of (a) as-synthesized of **7**, (b) ligand **L**<sup>3</sup>, (c) HgCl<sub>2</sub> and (d) grinding without solvent and grinding with (e) H<sub>2</sub>O, (f) DCM, (g) MeOH/H<sub>2</sub>O and (h) EtOH/H<sub>2</sub>O.

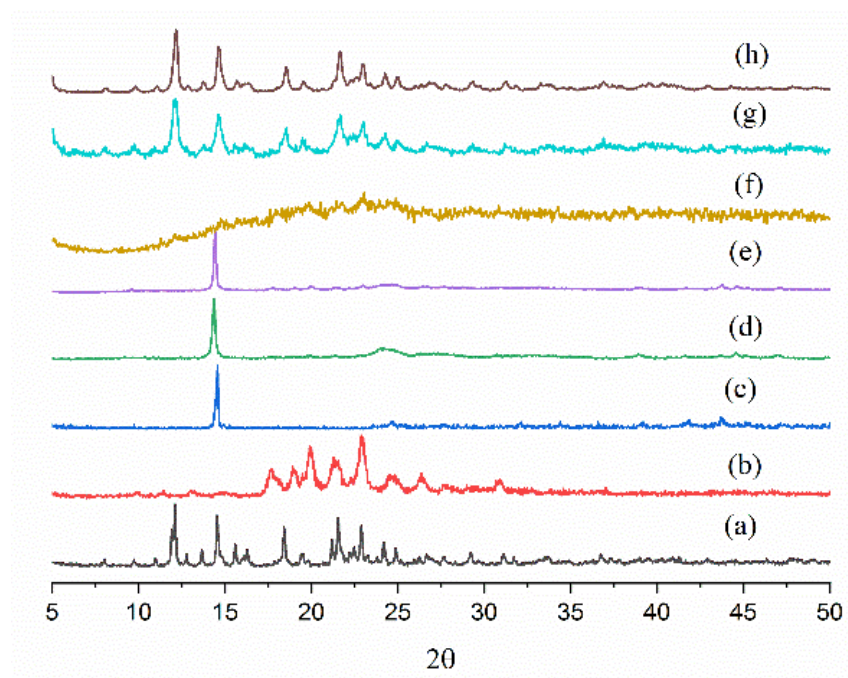

**Figure S11.** PXRD patterns of (a) as-synthesized of **8**, (b) ligand **L**<sup>3</sup>, (c) HgBr<sub>2</sub> and (d) grinding without solvent and grinding with (e) H<sub>2</sub>O, (f) DCM, (g) MeOH/H<sub>2</sub>O and (h) EtOH/H<sub>2</sub>O.

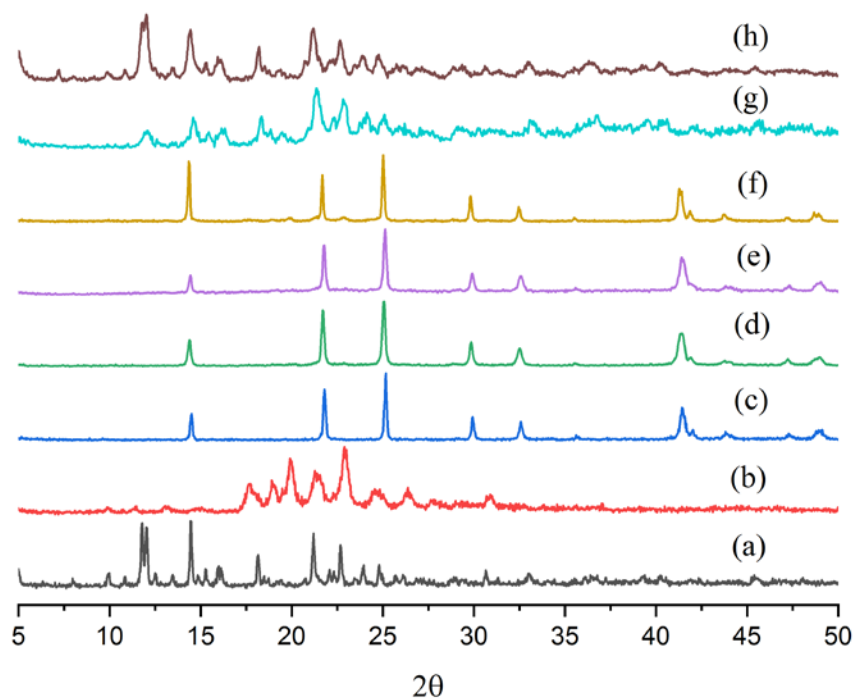

**Figure S12.** PXRD patterns of (a) as-synthesized of **9**, (b) ligand **L<sup>3</sup>**, (c) HgI<sub>2</sub> and (d) grinding without solvent and grinding with (e) H<sub>2</sub>O, (f) DCM, (g) MeOH/H<sub>2</sub>O and (h) EtOH/H<sub>2</sub>O.

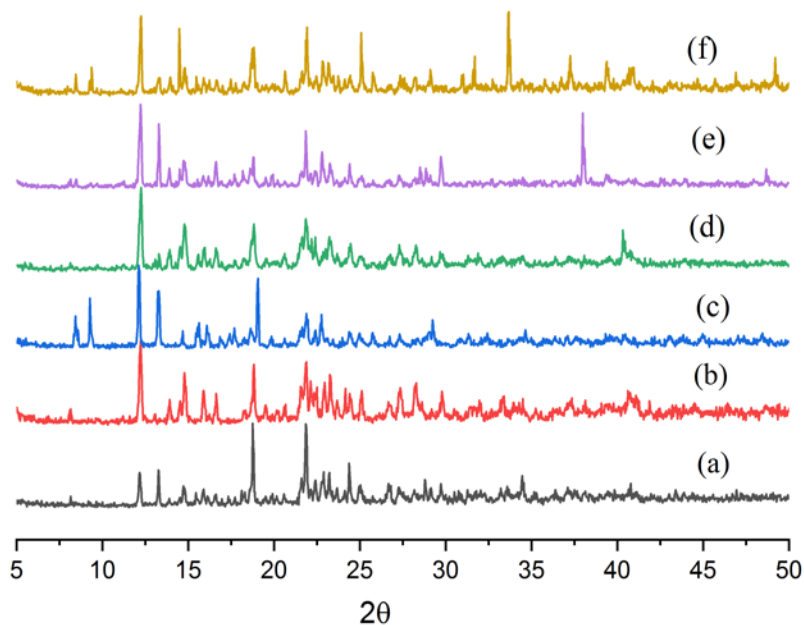

**Figure S13.** PXRD patterns of **7** in different solvents up to 7 days: (a) as-synthesized, (b) H<sub>2</sub>O, (c) EtOH, (d) MeOH, (e) DCM and (f) MeCN.

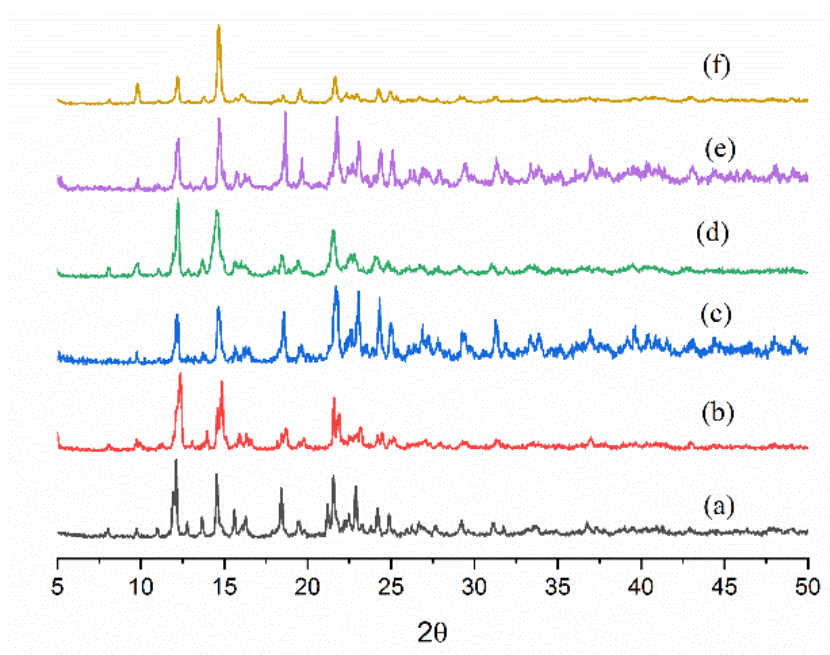

**Figure S14.** PXRD patterns of **8** in different solvents up to 7 days: (a) as-synthesized, (b) H<sub>2</sub>O, (c) EtOH, (d) MeOH, (e) DCM and (f) MeCN.

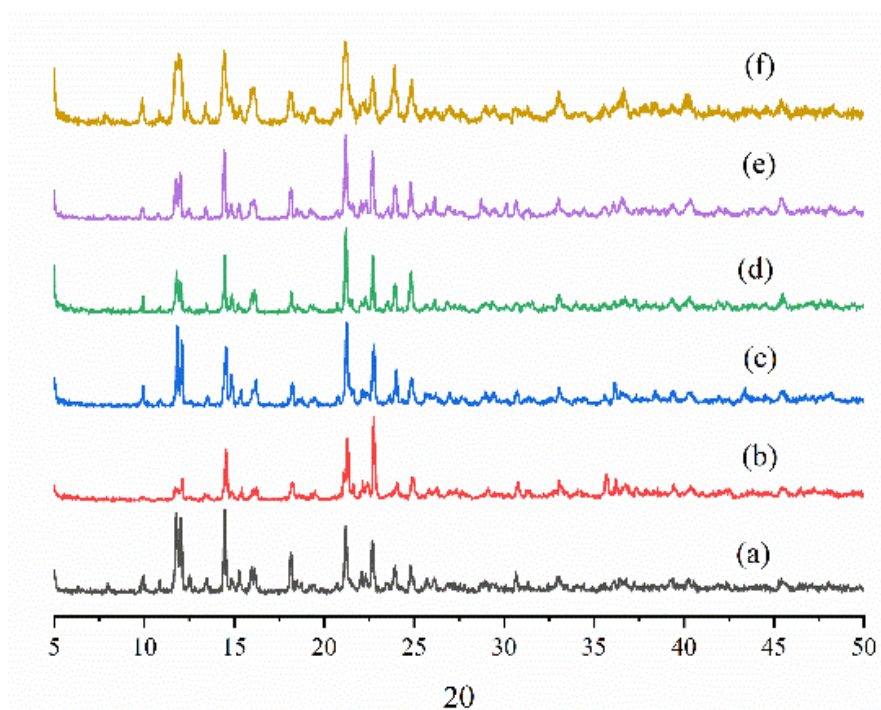

**Figure S15.** PXRD patterns of **9** in different solvents up to 7 days: (a) as-synthesized, (b) H<sub>2</sub>O, (c) EtOH, (d) MeOH, (e) DCM and (f) MeCN.

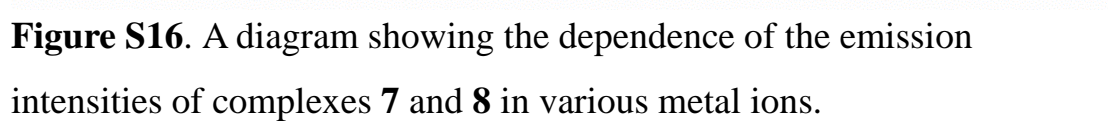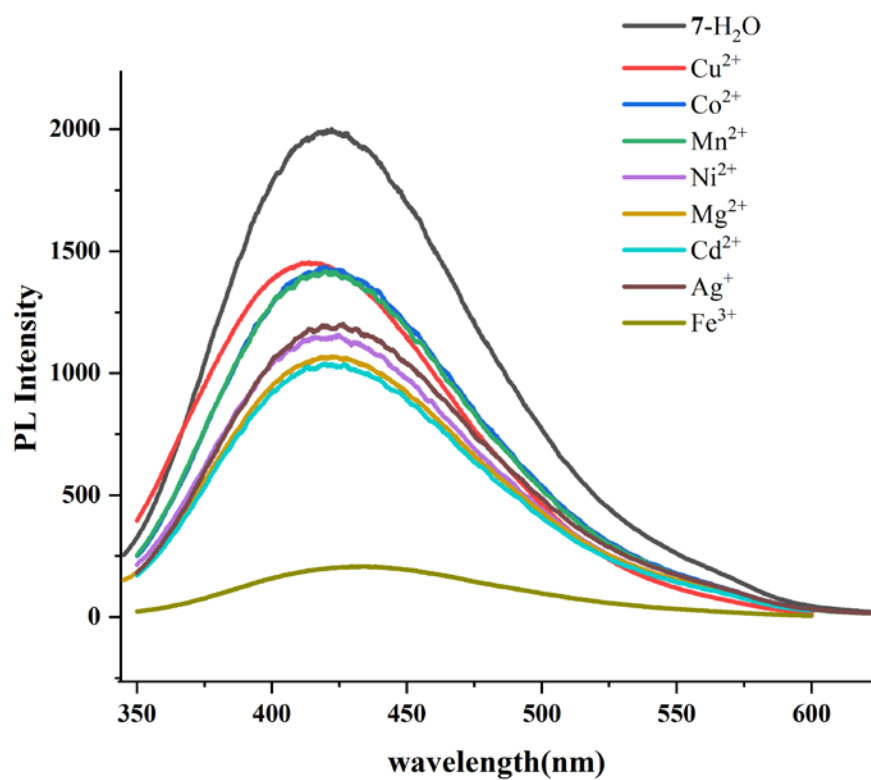

**Figure S17.** Solid-state emission spectra of **7** after immersion into different metal ions.

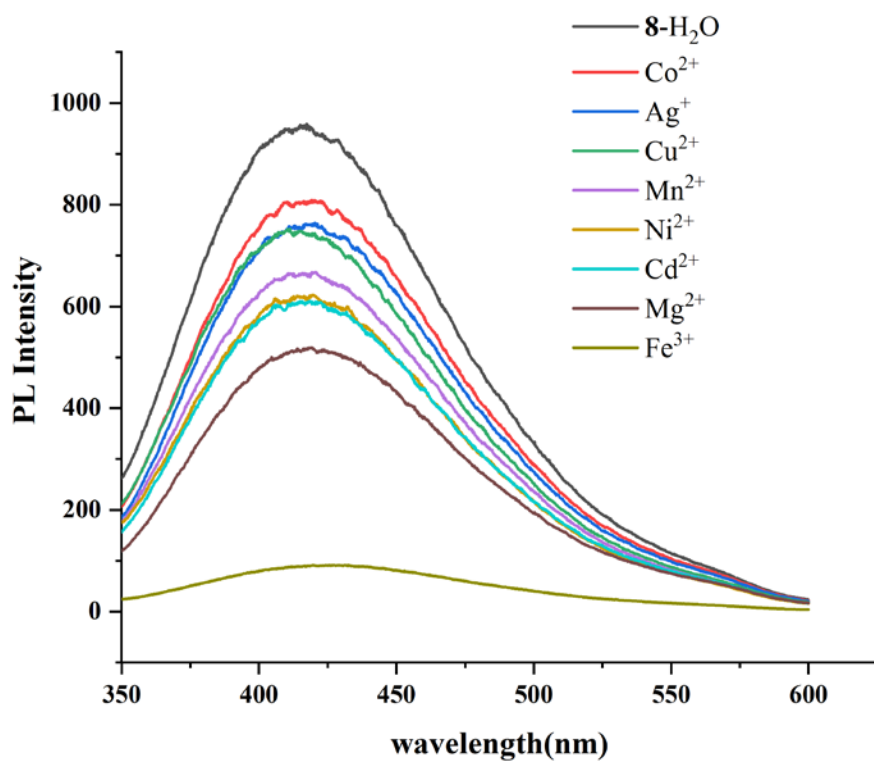

**Figure S18.** Solid-state emission spectra of **8** after immersion into different metal ions.

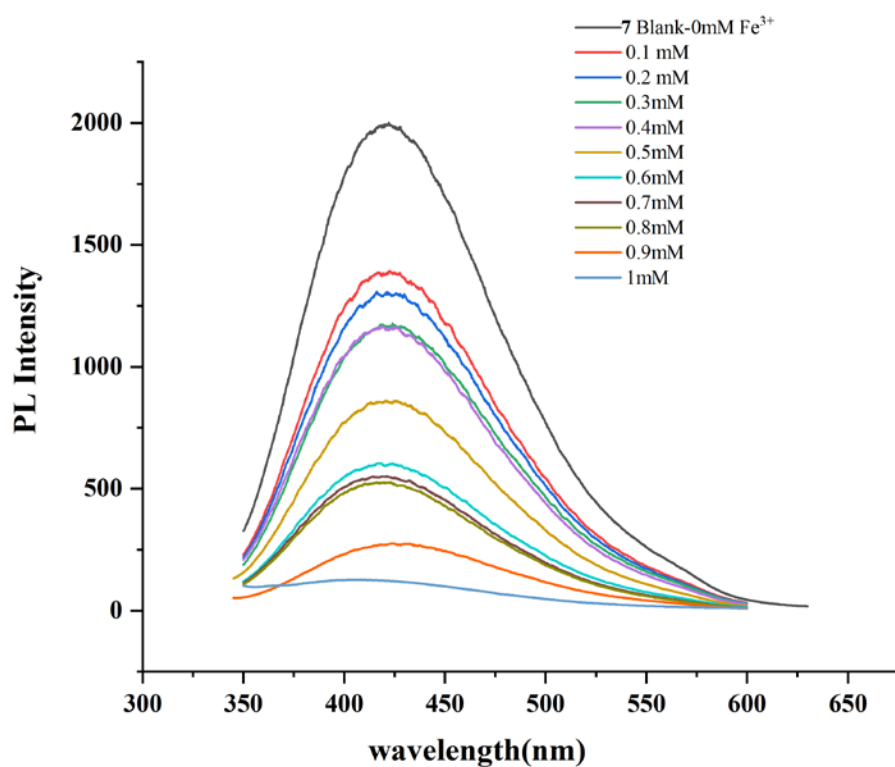

**Figure S19.** Dependence of the emission intensities of **7** in  $\text{Fe}^{3+}$  with various concentrations.

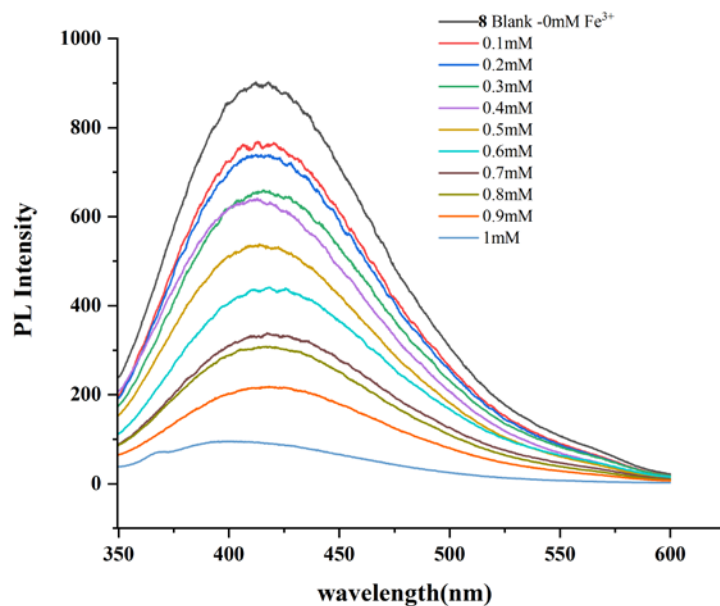

**Figure S20.** Dependence of the emission intensities of **8** in  $\text{Fe}^{3+}$  with various concentrations.

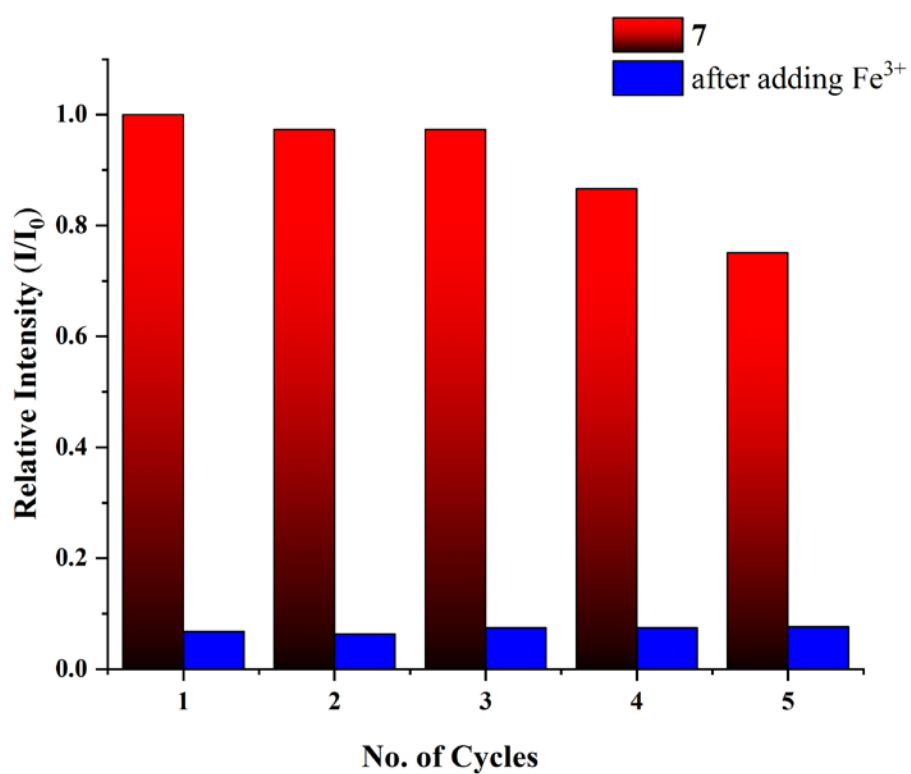

**Figure S21.** Bar diagrams showing the emission intensities ( $\lambda_{\text{ex}} = 325$  nm) of **7** treated with Fe<sup>3+</sup> for five repeated cycles.

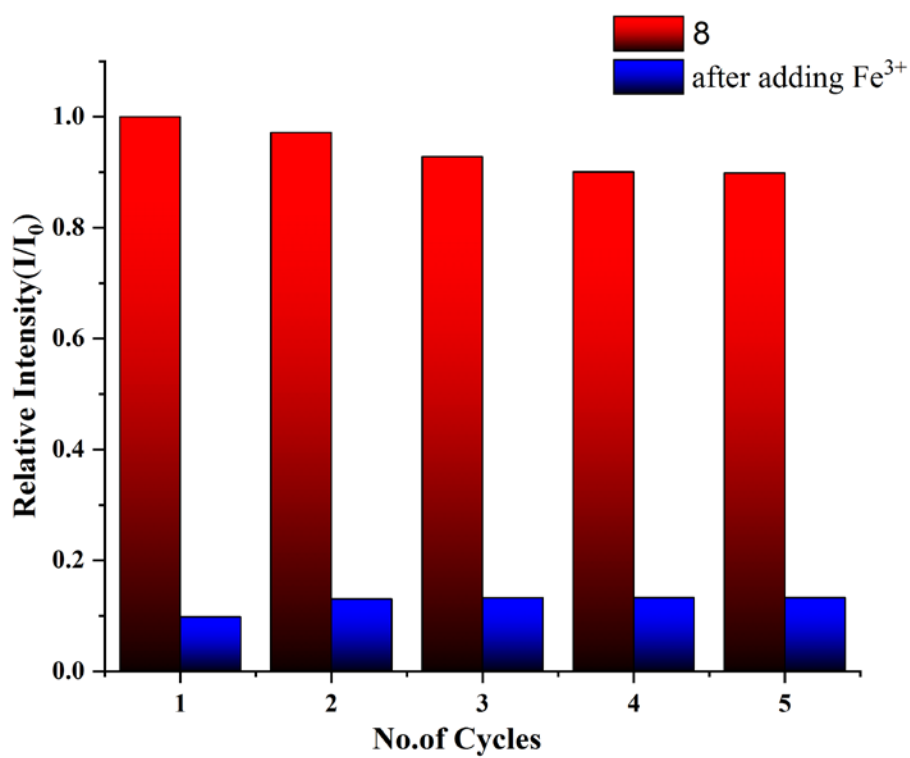

**Figure S22.** Bar diagrams showing the emission intensities ( $\lambda_{\text{ex}} = 326$  nm) of **8** treated with  $\text{Fe}^{3+}$  for five repeated cycles.

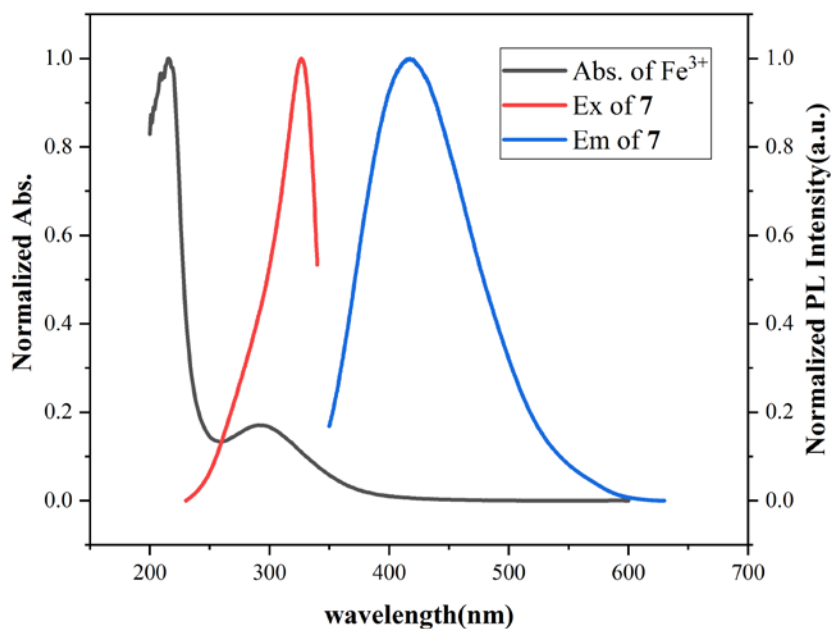

**Figure S23.** UV-vis absorption spectrum of  $\text{Fe}^{3+}$  ions in aqueous solution and the excitation and emission spectra of **7**.

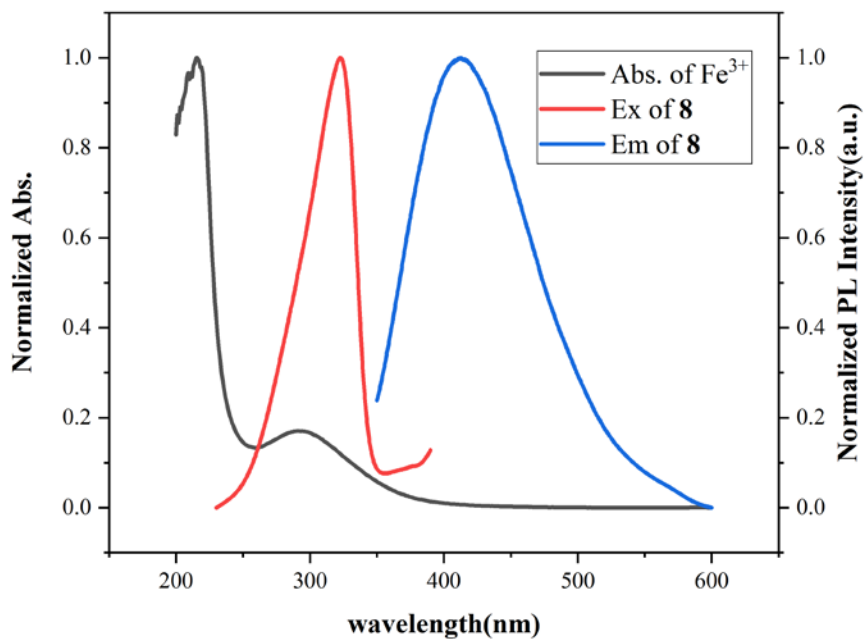

**Figure S24.** UV-vis absorption spectrum of  $\text{Fe}^{3+}$  ions in aqueous solution and the excitation and emission spectra of **8**.

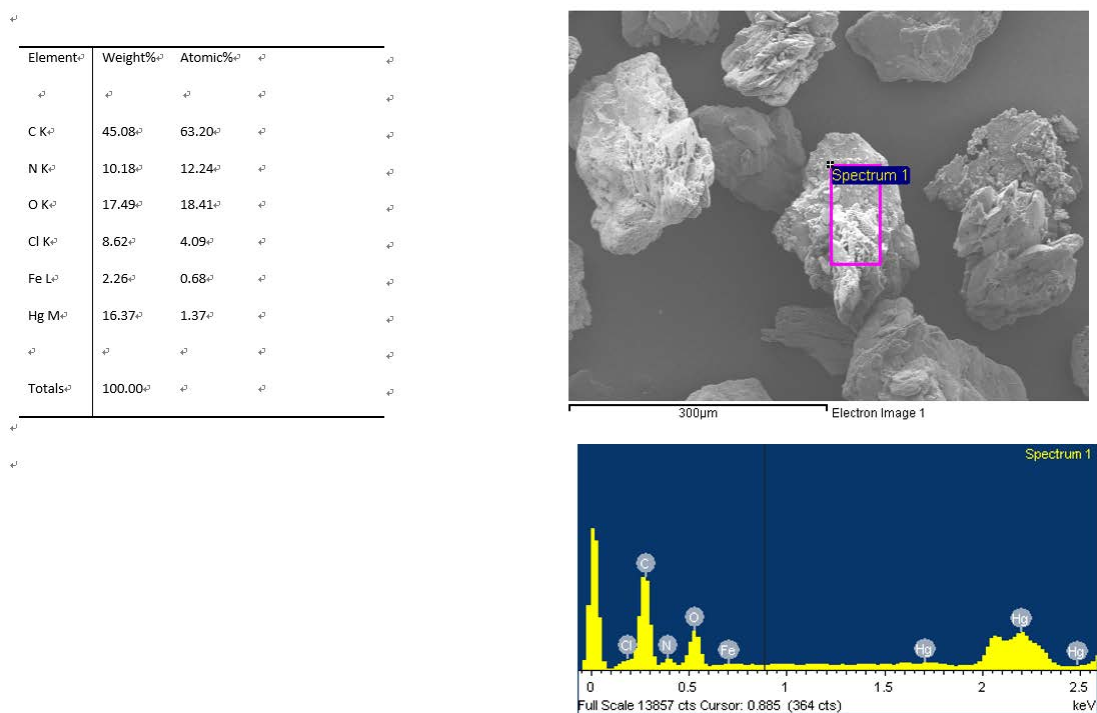

**Figure S25.** EDX data for Fe<sup>3+</sup>-uptaked complex 7.

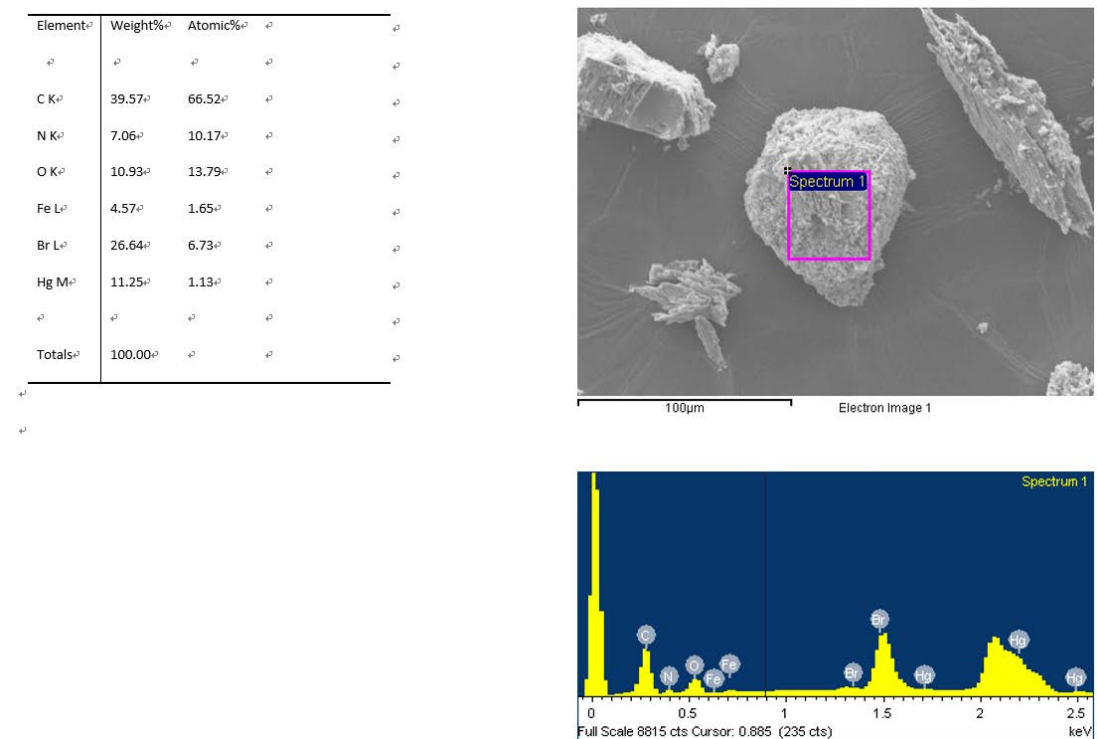

**Figure S26.** EDX data for Fe<sup>3+</sup>-uptaked complex 8.

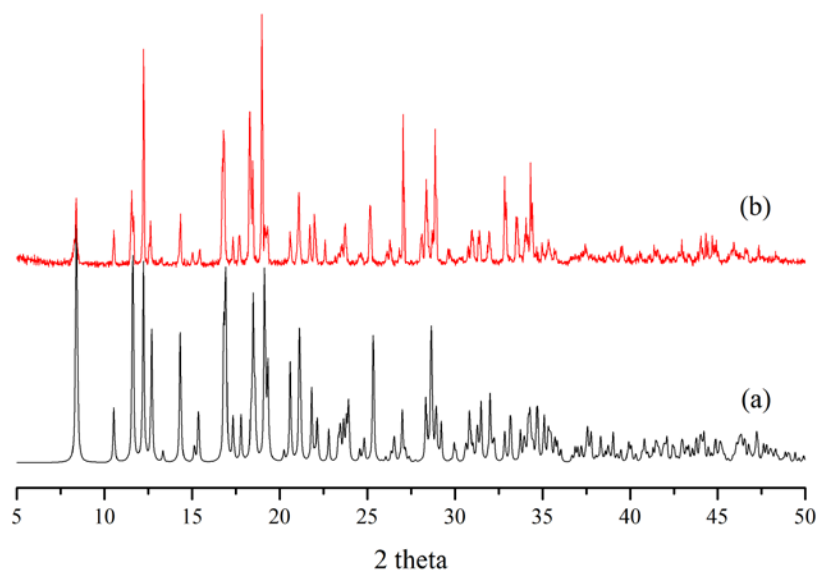

**Figure S27.** PXRD patterns of complex **1**. (a) simulated, (b) as synthesized by hydrothermal reaction.

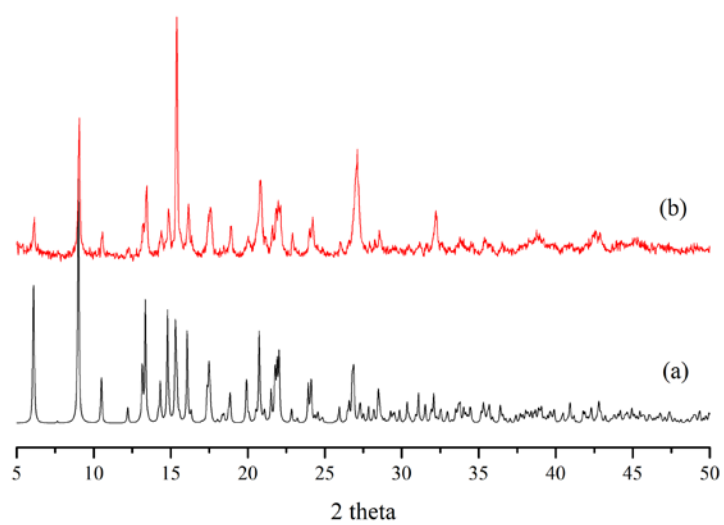

**Figure S28.** PXRD patterns of complex **2**. (a) simulated, (b) as synthesized by hydrothermal reaction.

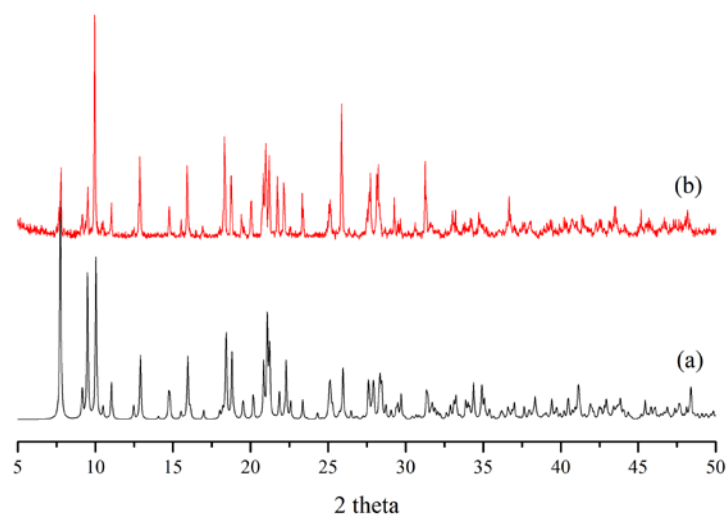

**Figure S29.** PXRD patterns of complex **3**. (a) simulated, (b) as synthesized by hydrothermal reaction.

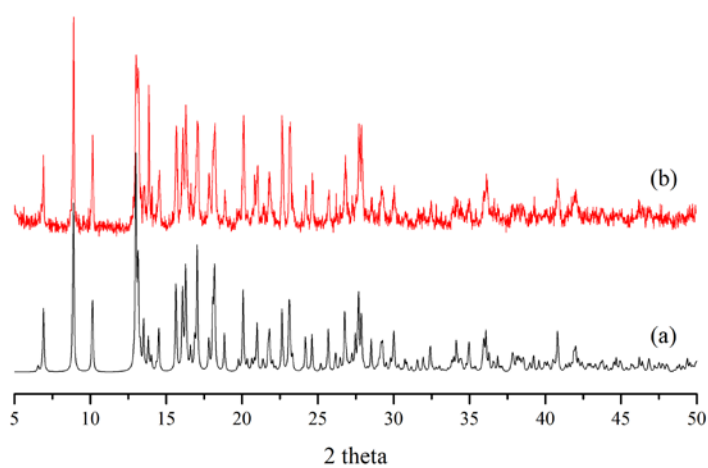

**Figure S30.** PXRD patterns of complex **4**. (a) simulated, (b) as synthesized by hydrothermal reaction.

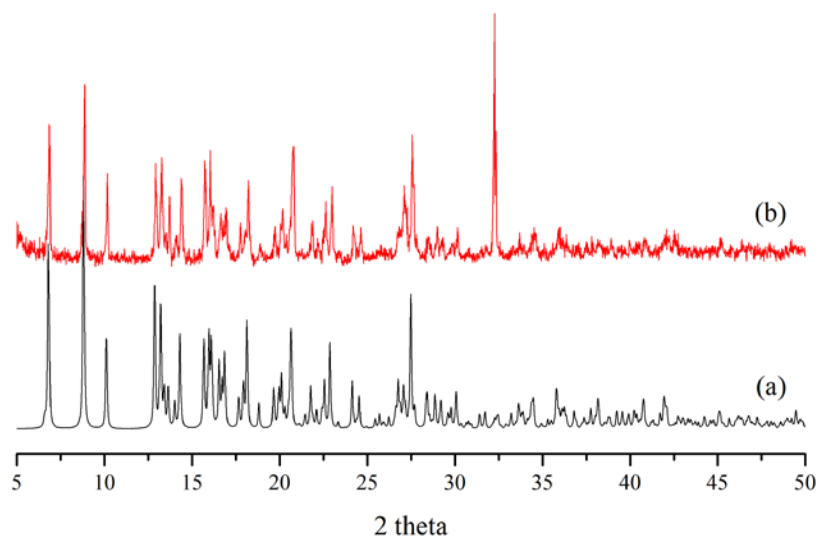

**Figure S31.** PXRD patterns of complex **5**. (a) simulated, (b) as synthesized by hydrothermal reaction.

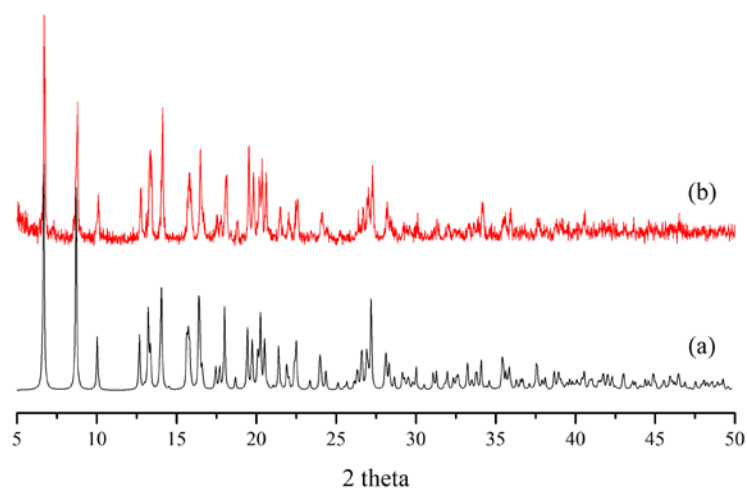

**Figure S32.** PXRD patterns of complex **6**. (a) simulated, (b) as synthesized by hydrothermal reaction.
