# Supplementary material for: Structural Diversity of Mercury(II) Halide Complexes Containing Bis-pyridyl-bis-amide with Bulky and Angular Backbones: Ligand Effect and Metal Sensing
Source: MDPI journal article supplement (doi:10.3390/ijms23147861), 2022-07-16
Supplement: s1 [file s1]

## checkCIF/PLATON report

Structure factors have been supplied for datablock(s) 1, 2, 3, 4, 5, 6, 7, 8, 9

THIS REPORT IS FOR GUIDANCE ONLY. IF USED AS PART OF A REVIEW PROCEDURE FOR PUBLICATION, IT SHOULD NOT REPLACE THE EXPERTISE OF AN EXPERIENCED CRYSTALLOGRAPHIC REFEREE.

No syntax errors found.      CIF dictionary      Interpreting this report

### Datablock: 1

---

Bond precision:      C-C = 0.0021 Å      Wavelength=0.71073

Cell:                  a=8.7814 (14)                  b=10.5498 (16)                  c=10.9631 (16)  
                         alpha=85.121 (4)                  beta=74.166 (4)                  gamma=81.889 (4)  
Temperature:          100 K

|                        | Calculated           | Reported             |
|------------------------|----------------------|----------------------|
| Volume                 | 966.2 (3)            | 966.2 (3)            |
| Space group            | P -1                 | P -1                 |
| Hall group             | -P 1                 | -P 1                 |
| Moiety formula         | C44 H32 Cl2 Hg N8 O8 | ?                    |
| Sum formula            | C44 H32 Cl2 Hg N8 O8 | C44 H32 Cl2 Hg N8 O8 |
| Mr                     | 1072.27              | 1072.26              |
| Dx, g cm <sup>-3</sup> | 1.843                | 1.843                |
| Z                      | 1                    | 1                    |
| Mu (mm <sup>-1</sup> ) | 4.192                | 4.192                |
| F000                   | 530.0                | 530.0                |
| F000'                  | 528.15               |                      |
| h, k, lmax             | 11, 14, 14           | 11, 14, 14           |
| Nref                   | 4826                 | 4816                 |
| Tmin, Tmax             | 0.380, 0.432         | 0.508, 0.746         |
| Tmin'                  | 0.180                |                      |

Correction method= # Reported T Limits: Tmin=0.508 Tmax=0.746  
AbsCorr = MULTI\_SCAN

Data completeness= 0.998      Theta(max)= 28.364

|                                |                                  |
|--------------------------------|----------------------------------|
| R(reflections)= 0.0142 ( 4815) | wR2(reflections)= 0.0368 ( 4816) |
| S = 1.088                      | Npar= 286                        |

---

The following ALERTS were generated. Each ALERT has the format

**test-name\_ALERT\_alert-type\_alert-level.**

Click on the hyperlinks for more details of the test.

---

### ● Alert level G

|                   |                                                  |              |
|-------------------|--------------------------------------------------|--------------|
| PLAT154_ALERT_1_G | The s.u.'s on the Cell Angles are Equal ..(Note) | 0.004 Degree |
| PLAT432_ALERT_2_G | Short Inter X...Y Contact O2 ..C6 .              | 2.95 Ang.    |
|                   | 1-x,1-y,1-z =                                    | 2_666 Check  |
| PLAT432_ALERT_2_G | Short Inter X...Y Contact C6 ..C6 .              | 3.13 Ang.    |
|                   | 1-x,1-y,1-z =                                    | 2_666 Check  |
| PLAT767_ALERT_4_G | INS Embedded LIST 6 Instruction Should be LIST 4 | Please Check |
| PLAT793_ALERT_4_G | Model has Chirality at C7 (Centro SPGR)          | S Verify     |
| PLAT793_ALERT_4_G | Model has Chirality at C8 (Centro SPGR)          | S Verify     |
| PLAT793_ALERT_4_G | Model has Chirality at C9 (Centro SPGR)          | R Verify     |
| PLAT793_ALERT_4_G | Model has Chirality at C12 (Centro SPGR)         | S Verify     |
| PLAT793_ALERT_4_G | Model has Chirality at C13 (Centro SPGR)         | R Verify     |
| PLAT793_ALERT_4_G | Model has Chirality at C14 (Centro SPGR)         | R Verify     |
| PLAT883_ALERT_1_G | No Info/Value for _atom_sites_solution_primary . | Please Do !  |
| PLAT912_ALERT_4_G | Missing # of FCF Reflections Above STh/L= 0.600  | 10 Note      |
| PLAT941_ALERT_3_G | Average HKL Measurement Multiplicity .....       | 4.6 Low      |
| PLAT961_ALERT_5_G | Dataset Contains no Negative Intensities .....   | Please Check |
| PLAT978_ALERT_2_G | Number C-C Bonds with Positive Residual Density. | 14 Info      |

---

0 **ALERT level A** = Most likely a serious problem - resolve or explain  
0 **ALERT level B** = A potentially serious problem, consider carefully  
0 **ALERT level C** = Check. Ensure it is not caused by an omission or oversight  
15 **ALERT level G** = General information/check it is not something unexpected

2 ALERT type 1 CIF construction/syntax error, inconsistent or missing data  
3 ALERT type 2 Indicator that the structure model may be wrong or deficient  
1 ALERT type 3 Indicator that the structure quality may be low  
8 ALERT type 4 Improvement, methodology, query or suggestion  
1 ALERT type 5 Informative message, check

---

## Datablock: 2

---

Bond precision: C-C = 0.0050 A

Wavelength=0.71073

|              |                  |                 |                  |
|--------------|------------------|-----------------|------------------|
| Cell:        | a=6.80779(8)     | b=11.83139(14)  | c=14.71857(16)   |
|              | alpha=80.4699(6) | beta=85.6414(6) | gamma=81.8897(6) |
| Temperature: | 296 K            |                 |                  |

|                        | Calculated           | Reported             |
|------------------------|----------------------|----------------------|
| Volume                 | 1155.78 (2)          | 1155.78 (2)          |
| Space group            | P -1                 | P -1                 |
| Hall group             | -P 1                 | -P 1                 |
| Moiety formula         | C22 H16 Br2 Hg N4 O4 | ?                    |
| Sum formula            | C22 H16 Br2 Hg N4 O4 | C22 H16 Br2 Hg N4 O4 |
| Mr                     | 760.78               | 760.80               |
| Dx, g cm <sup>-3</sup> | 2.186                | 2.186                |
| Z                      | 2                    | 2                    |
| Mu (mm <sup>-1</sup> ) | 10.153               | 10.153               |
| F000                   | 716.0                | 716.0                |
| F000'                  | 710.71               |                      |
| h, k, lmax             | 9, 15, 19            | 9, 15, 19            |
| Nref                   | 5741                 | 5727                 |
| Tmin, Tmax             | 0.024, 0.362         | 0.320, 0.746         |
| Tmin'                  | 0.012                |                      |

Correction method= # Reported T Limits: Tmin=0.320 Tmax=0.746  
AbsCorr = MULTI\_SCAN

Data completeness= 0.998                      Theta(max)= 28.297

R(reflections)= 0.0289( 5182)                      wR2(reflections)=  
0.0714( 5727)  
S = 1.070                      Npar= 298

The following ALERTS were generated. Each ALERT has the format

**test-name\_ALERT\_alert-type\_alert-level.**

Click on the hyperlinks for more details of the test.



#### Alert level C

|                   |                          |                  |            |
|-------------------|--------------------------|------------------|------------|
| PLAT972_ALERT_2_C | Check Calcd Resid. Dens. | 0.89Ang From Hg  | -2.06 eA-3 |
| PLAT972_ALERT_2_C | Check Calcd Resid. Dens. | 0.86Ang From Br1 | -1.53 eA-3 |



#### Alert level G

|                   |                                                  |               |
|-------------------|--------------------------------------------------|---------------|
| PLAT004_ALERT_5_G | Polymeric Structure Found with Maximum Dimension | 1 Info        |
| PLAT154_ALERT_1_G | The s.u.'s on the Cell Angles are Equal ..(Note) | 0.0006 Degree |
| PLAT232_ALERT_2_G | Hirshfeld Test Diff (M-X) Hg --Br1 .             | 9.2 s.u.      |
| PLAT232_ALERT_2_G | Hirshfeld Test Diff (M-X) Hg --Br2 .             | 14.5 s.u.     |
| PLAT232_ALERT_2_G | Hirshfeld Test Diff (M-X) Hg --N4_a .            | 6.4 s.u.      |
| PLAT804_ALERT_5_G | Number of ARU-Code Packing Problem(s) in PLATON  | 2 Info        |
| PLAT883_ALERT_1_G | No Info/Value for _atom_sites_solution_primary . | Please Do !   |
| PLAT910_ALERT_3_G | Missing # of FCF Reflection(s) Below Theta(Min). | 1 Note        |
| PLAT912_ALERT_4_G | Missing # of FCF Reflections Above STh/L= 0.600  | 13 Note       |
| PLAT941_ALERT_3_G | Average HKL Measurement Multiplicity .....       | 3.7 Low       |
| PLAT978_ALERT_2_G | Number C-C Bonds with Positive Residual Density. | 3 Info        |

---

0 **ALERT level A** = Most likely a serious problem - resolve or explain  
 0 **ALERT level B** = A potentially serious problem, consider carefully  
 2 **ALERT level C** = Check. Ensure it is not caused by an omission or oversight  
 11 **ALERT level G** = General information/check it is not something unexpected

2 ALERT type 1 CIF construction/syntax error, inconsistent or missing data  
 6 ALERT type 2 Indicator that the structure model may be wrong or deficient  
 2 ALERT type 3 Indicator that the structure quality may be low  
 1 ALERT type 4 Improvement, methodology, query or suggestion  
 2 ALERT type 5 Informative message, check

---

## Datablock: 3

---

Bond precision: C-C = 0.0051 A Wavelength=0.71073  
 Cell: a=9.7275(5) b=11.5101(8) c=12.4521(7)  
 alpha=106.3362(18) beta=98.0437(13) gamma=114.9454(11)  
 Temperature: 100 K

|                | Calculated          | Reported            |
|----------------|---------------------|---------------------|
| Volume         | 1158.30(12)         | 1158.30(12)         |
| Space group    | P -1                | P -1                |
| Hall group     | -P 1                | -P 1                |
| Moiety formula | C22 H16 Hg I2 N4 O4 | ?                   |
| Sum formula    | C22 H16 Hg I2 N4 O4 | C22 H16 Hg I2 N4 O4 |
| Mr             | 854.78              | 854.78              |
| Dx, g cm-3     | 2.451               | 2.451               |
| Z              | 2                   | 2                   |
| Mu (mm-1)      | 9.347               | 9.347               |
| F000           | 788.0               | 788.0               |
| F000'          | 781.86              |                     |
| h, k, lmax     | 11, 14, 15          | 11, 14, 15          |
| Nref           | 4546                | 4540                |
| Tmin, Tmax     | 0.048, 0.154        | 0.411, 0.746        |
| Tmin'          | 0.017               |                     |

Correction method= # Reported T Limits: Tmin=0.411 Tmax=0.746  
 AbsCorr = MULTI\_SCAN

Data completeness= 0.999 Theta(max)= 25.998

R(reflections)= 0.0158( 4481) wR2(reflections)=  
 0.0397( 4540)  
 S = 1.029 Npar= 298

---

The following ALERTS were generated. Each ALERT has the format

**test-name\_ALERT\_alert-type\_alert-level.**

Click on the hyperlinks for more details of the test.

---

 **Alert level C**

PLAT911\_ALERT\_3\_C Missing FCF Refl Between Thmin & STh/L= 0.600 7 Report

---

 **Alert level G**

|                                                                    |               |              |
|--------------------------------------------------------------------|---------------|--------------|
| PLAT793_ALERT_4_G Model has Chirality at C7                        | (Centro SPGR) | R Verify     |
| PLAT793_ALERT_4_G Model has Chirality at C8                        | (Centro SPGR) | R Verify     |
| PLAT793_ALERT_4_G Model has Chirality at C9                        | (Centro SPGR) | S Verify     |
| PLAT793_ALERT_4_G Model has Chirality at C12                       | (Centro SPGR) | R Verify     |
| PLAT793_ALERT_4_G Model has Chirality at C13                       | (Centro SPGR) | S Verify     |
| PLAT793_ALERT_4_G Model has Chirality at C14                       | (Centro SPGR) | S Verify     |
| PLAT883_ALERT_1_G No Info/Value for _atom_sites_solution_primary . |               | Please Do !  |
| PLAT933_ALERT_2_G Number of HKL-OMIT Records in Embedded .res File |               | 7 Note       |
| PLAT965_ALERT_2_G The SHELXL WEIGHT Optimisation has not Converged |               | Please Check |
| PLAT967_ALERT_5_G Note: Two-Theta Cutoff Value in Embedded .res .. |               | 52.0 Degree  |
| PLAT978_ALERT_2_G Number C-C Bonds with Positive Residual Density. |               | 7 Info       |

---

- 0 **ALERT level A** = Most likely a serious problem - resolve or explain  
0 **ALERT level B** = A potentially serious problem, consider carefully  
1 **ALERT level C** = Check. Ensure it is not caused by an omission or oversight  
11 **ALERT level G** = General information/check it is not something unexpected
- 1 ALERT type 1 CIF construction/syntax error, inconsistent or missing data  
3 ALERT type 2 Indicator that the structure model may be wrong or deficient  
1 ALERT type 3 Indicator that the structure quality may be low  
6 ALERT type 4 Improvement, methodology, query or suggestion  
1 ALERT type 5 Informative message, check
- 

## Datablock: 4

---

Bond precision: C-C = 0.0057 A

Wavelength=0.71073

Cell: a=25.8153(6) b=7.0635(2) c=27.1652(7)

alpha=90 beta=97.5487(12) gamma=90

Temperature: 296 K

|                   |                                                |       |               |   |             |
|-------------------|------------------------------------------------|-------|---------------|---|-------------|
| PLAT232_ALERT_2_G | Hirshfeld Test Diff (M-X)                      | Hg    | --C11         | . | 9.8 s.u.    |
| PLAT793_ALERT_4_G | Model has Chirality at C8                      |       | (Centro SPGR) |   | R Verify    |
| PLAT793_ALERT_4_G | Model has Chirality at C9                      |       | (Centro SPGR) |   | S Verify    |
| PLAT793_ALERT_4_G | Model has Chirality at C11                     |       | (Centro SPGR) |   | S Verify    |
| PLAT793_ALERT_4_G | Model has Chirality at C14                     |       | (Centro SPGR) |   | R Verify    |
| PLAT793_ALERT_4_G | Model has Chirality at C15                     |       | (Centro SPGR) |   | S Verify    |
| PLAT793_ALERT_4_G | Model has Chirality at C18                     |       | (Centro SPGR) |   | R Verify    |
| PLAT883_ALERT_1_G | No Info/Value for _atom_sites_solution_primary |       |               |   | Please Do ! |
| PLAT912_ALERT_4_G | Missing # of FCF Reflections Above STH/L=      | 0.600 |               |   | 7 Note      |

|                   |                                                  |     |      |
|-------------------|--------------------------------------------------|-----|------|
| PLAT933_ALERT_2_G | Number of HKL-OMIT Records in Embedded .res File | 2   | Note |
| PLAT941_ALERT_3_G | Average HKL Measurement Multiplicity .....       | 2.8 | Low  |
| PLAT978_ALERT_2_G | Number C-C Bonds with Positive Residual Density. | 3   | Info |

---

0 **ALERT level A** = Most likely a serious problem - resolve or explain  
 0 **ALERT level B** = A potentially serious problem, consider carefully  
 5 **ALERT level C** = Check. Ensure it is not caused by an omission or oversight  
 12 **ALERT level G** = General information/check it is not something unexpected

1 ALERT type 1 CIF construction/syntax error, inconsistent or missing data  
 6 ALERT type 2 Indicator that the structure model may be wrong or deficient  
 3 ALERT type 3 Indicator that the structure quality may be low  
 7 ALERT type 4 Improvement, methodology, query or suggestion  
 0 ALERT type 5 Informative message, check

---

## Datablock: 5

---

Bond precision:    C-C = 0.0067 Å                      Wavelength=0.71073

Cell:                      a=26.208(2)              b=7.1272(7)              c=27.046(3)  
                                     alpha=90                      beta=97.866(5)              gamma=90

Temperature:              305 K

|                        | Calculated            | Reported              |
|------------------------|-----------------------|-----------------------|
| Volume                 | 5004.4(8)             | 5004.3(8)             |
| Space group            | C 2/c                 | C 2/c                 |
| Hall group             | -C 2yc                | -C 2yc                |
| Moiety formula         | C48 H40 Br4 Hg2 N8 O8 | ?                     |
| Sum formula            | C48 H40 Br4 Hg2 N8 O8 | C48 H40 Br4 Hg2 N8 O8 |
| Mr                     | 1577.66               | 1577.70               |
| Dx, g cm <sup>-3</sup> | 2.094                 | 2.094                 |
| Z                      | 4                     | 4                     |
| Mu (mm <sup>-1</sup> ) | 9.383                 | 9.383                 |
| F000                   | 2992.0                | 2992.0                |
| F000'                  | 2970.78               |                       |
| h, k, lmax             | 34, 9, 36             | 34, 9, 36             |
| Nref                   | 6320                  | 6265                  |
| Tmin, Tmax             | 0.121, 0.391          | 0.366, 0.746          |
| Tmin'                  | 0.052                 |                       |

Correction method= # Reported T Limits: Tmin=0.366 Tmax=0.746  
 AbsCorr = MULTI\_SCAN

Data completeness= 0.991                      Theta(max)= 28.445

R(reflections)= 0.0397( 4327)

wR2(reflections)=  
0.0904( 6265)

S = 1.025

Npar= 298

---

The following ALERTS were generated. Each ALERT has the format

**test-name\_ALERT\_alert-type\_alert-level.**

Click on the hyperlinks for more details of the test.

---

### Alert level G

|                                                                    |              |
|--------------------------------------------------------------------|--------------|
| PLAT083_ALERT_2_G SHELXL Second Parameter in WGHT Unusually Large  | 5.07 Why ?   |
| PLAT171_ALERT_4_G The CIF-Embedded .res File Contains EADP Records | 1 Report     |
| PLAT793_ALERT_4_G Model has Chirality at C8 (Centro SPGR)          | R Verify     |
| PLAT793_ALERT_4_G Model has Chirality at C9 (Centro SPGR)          | S Verify     |
| PLAT793_ALERT_4_G Model has Chirality at C15 (Centro SPGR)         | S Verify     |
| PLAT793_ALERT_4_G Model has Chirality at C16 (Centro SPGR)         | R Verify     |
| PLAT883_ALERT_1_G No Info/Value for _atom_sites_solution_primary . | Please Do !  |
| PLAT912_ALERT_4_G Missing # of FCF Reflections Above STh/L= 0.600  | 55 Note      |
| PLAT941_ALERT_3_G Average HKL Measurement Multiplicity .....       | 3.9 Low      |
| PLAT965_ALERT_2_G The SHELXL WEIGHT Optimisation has not Converged | Please Check |
| PLAT978_ALERT_2_G Number C-C Bonds with Positive Residual Density. | 2 Info       |

---

0 **ALERT level A** = Most likely a serious problem - resolve or explain  
0 **ALERT level B** = A potentially serious problem, consider carefully  
0 **ALERT level C** = Check. Ensure it is not caused by an omission or oversight  
11 **ALERT level G** = General information/check it is not something unexpected

1 ALERT type 1 CIF construction/syntax error, inconsistent or missing data  
3 ALERT type 2 Indicator that the structure model may be wrong or deficient  
1 ALERT type 3 Indicator that the structure quality may be low  
6 ALERT type 4 Improvement, methodology, query or suggestion  
0 ALERT type 5 Informative message, check

---

## Datablock: 6

---

Bond precision: C-C = 0.0053 A

Wavelength=0.71073

Cell: a=26.7552(5) b=7.2351(1) c=27.0340(5)  
alpha=90 beta=98.0783(9) gamma=90

Temperature: 305 K

|                        | Calculated           | Reported             |
|------------------------|----------------------|----------------------|
| Volume                 | 5181.22 (15)         | 5181.22 (15)         |
| Space group            | C 2/c                | C 2/c                |
| Hall group             | -C 2yc               | -C 2yc               |
| Moiety formula         | C48 H40 Hg2 I4 N8 O8 | ?                    |
| Sum formula            | C48 H40 Hg2 I4 N8 O8 | C48 H40 Hg2 I4 N8 O8 |
| Mr                     | 1765.66              | 1765.66              |
| Dx, g cm <sup>-3</sup> | 2.263                | 2.264                |
| Z                      | 4                    | 4                    |
| Mu (mm <sup>-1</sup> ) | 8.362                | 8.362                |
| F000                   | 3280.0               | 3280.0               |
| F000'                  | 3255.42              |                      |
| h, k, l <sub>max</sub> | 35, 9, 36            | 35, 9, 36            |
| Nref                   | 6465                 | 6439                 |
| Tmin, Tmax             | 0.102, 0.188         | 0.383, 0.746         |
| Tmin'                  | 0.065                |                      |

Correction method= # Reported T Limits: Tmin=0.383 Tmax=0.746  
AbsCorr = MULTI\_SCAN

Data completeness= 0.996                      Theta(max)= 28.339

R(reflections)= 0.0294 ( 5625)                      wR2(reflections)=  
0.0706 ( 6439)  
S = 1.033                      Npar= 317

The following ALERTS were generated. Each ALERT has the format

**test-name\_ALERT\_alert-type\_alert-level.**

Click on the hyperlinks for more details of the test.



#### Alert level C

PLAT911\_ALERT\_3\_C Missing FCF Refl Between Thmin & STh/L= 0.600                      2 Report



#### Alert level G

PLAT083\_ALERT\_2\_G SHELXL Second Parameter in WGHT Unusually Large 13.85 Why ?  
 PLAT232\_ALERT\_2\_G Hirshfeld Test Diff (M-X) Hg --I2 . 6.0 s.u.  
 PLAT793\_ALERT\_4\_G Model has Chirality at C8 (Centro SPGR) R Verify  
 PLAT793\_ALERT\_4\_G Model has Chirality at C9 (Centro SPGR) S Verify  
 PLAT793\_ALERT\_4\_G Model has Chirality at C15 (Centro SPGR) S Verify  
 PLAT793\_ALERT\_4\_G Model has Chirality at C16 (Centro SPGR) R Verify  
 PLAT883\_ALERT\_1\_G No Info/Value for \_atom\_sites\_solution\_primary . Please Do !  
 PLAT912\_ALERT\_4\_G Missing # of FCF Reflections Above STh/L= 0.600 24 Note  
 PLAT941\_ALERT\_3\_G Average HKL Measurement Multiplicity ..... 3.8 Low  
 PLAT965\_ALERT\_2\_G The SHELXL WEIGHT Optimisation has not Converged Please Check  
 PLAT978\_ALERT\_2\_G Number C-C Bonds with Positive Residual Density. 2 Info



**test-name\_ALERT\_alert-type\_alert-level.**  
Click on the hyperlinks for more details of the test.

```
PLAT414_ALERT_2_C Short Intra D-H..H-X      H3A      ..H17A      .          1.96 Ang.  
x,y,z =          1.555 Check
```

|                   |                                                   |        |        |
|-------------------|---------------------------------------------------|--------|--------|
| PLAT004_ALERT_5_G | Polymeric Structure Found with Maximum Dimension  | 1      | Info   |
| PLAT007_ALERT_5_G | Number of Unrefined Donor-H Atoms .....           | 4      | Report |
| PLAT232_ALERT_2_G | Hirshfeld Test Diff (M-X) Hg --N1 .               | 7.0    | s.u.   |
| PLAT300_ALERT_4_G | Atom Site Occupancy of O4 Constrained at          | 0.6    | Check  |
| PLAT300_ALERT_4_G | Atom Site Occupancy of O4' Constrained at         | 0.2    | Check  |
| PLAT300_ALERT_4_G | Atom Site Occupancy of O4" Constrained at         | 0.2    | Check  |
| PLAT302_ALERT_4_G | Anion/Solvent/Minor-Residue Disorder (Resd 2 )    | 100%   | Note   |
| PLAT311_ALERT_2_G | Isolated Disordered Oxygen Atom (No H's ?) .....  | O4'    | Check  |
| PLAT311_ALERT_2_G | Isolated Disordered Oxygen Atom (No H's ?) .....  | O4"    | Check  |
| PLAT883_ALERT_1_G | No Info/Value for _atom_sites_solution_primary .  | Please | Do !   |
| PLAT910_ALERT_3_G | Missing # of FCF Reflection(s) Below Theta (Min). | 1      | Note   |
| PLAT912_ALERT_4_G | Missing # of FCF Reflections Above STH/L= 0.600   | 24     | Note   |
| PLAT978_ALERT_2_G | Number C-C Bonds with Positive Residual Density.  | 6      | Info   |

- ```

1 ALERT type 1 CIF construction/syntax error, inconsistent or missing data
5 ALERT type 2 Indicator that the structure model may be wrong or deficient
1 ALERT type 3 Indicator that the structure quality may be low
5 ALERT type 4 Improvement, methodology, query or suggestion
2 ALERT type 5 Informative message, check

```

|                 |                |                    |              |  |
|-----------------|----------------|--------------------|--------------|--|
| Bond precision: | C-C = 0.0154 Å | Wavelength=0.71073 |              |  |
| Cell:           | a=18.2680 (16) | b=13.9475 (11)     | c=9.9861 (8) |  |
|                 | alpha=90       | beta=91.326 (4)    | gamma=90     |  |
| Temperature:    | 296 K          |                    |              |  |

|                        | Calculated                                            | Reported             |
|------------------------|-------------------------------------------------------|----------------------|
| Volume                 | 2543.7(4)                                             | 2543.7(4)            |
| Space group            | P 21/c                                                | P 21/c               |
| Hall group             | -P 2ybc                                               | -P 2ybc              |
| Moiety formula         | 2(C24 H18 Br2 Hg N4 O3),<br>0.375(O4), 2(H0.50 O0.25) | ?                    |
| Sum formula            | C48 H37 Br4 Hg2 N8 O8                                 | C24 H20 Br2 Hg N4 O4 |
| Mr                     | 1574.64                                               | 788.85               |
| Dx, g cm <sup>-3</sup> | 2.056                                                 | 2.060                |
| Z                      | 2                                                     | 4                    |
| Mu (mm <sup>-1</sup> ) | 9.230                                                 | 9.230                |
| F000                   | 1490.0                                                | 1496.0               |
| F000'                  | 1479.40                                               |                      |
| h,k,lmax               | 22,17,12                                              | 22,17,12             |
| Nref                   | 5040                                                  | 4984                 |
| Tmin,Tmax              | 0.182,0.158                                           | 0.437,0.746          |
| Tmin'                  | 0.137                                                 |                      |

Correction method= # Reported T Limits: Tmin=0.437 Tmax=0.746  
AbsCorr = MULTI\_SCAN

Data completeness= 0.989

Theta(max)= 26.054

R(reflections)= 0.0535( 3771)

wR2(reflections)=  
0.1506( 4984)

S = 1.044

Npar= 321

The following ALERTS were generated. Each ALERT has the format

**test-name\_ALERT\_alert-type\_alert-level.**

Click on the hyperlinks for more details of the test.

### Alert level C

|                   |                                                  |                |              |
|-------------------|--------------------------------------------------|----------------|--------------|
| PLAT041_ALERT_1_C | Calc. and Reported SumFormula                    | Strings Differ | Please Check |
| PLAT043_ALERT_1_C | Calculated and Reported Mol. Weight              | Differ by ..   | 3.06 Check   |
| PLAT068_ALERT_1_C | Reported F000 Differs from Calcd (or Missing)... |                | Please Check |
| PLAT241_ALERT_2_C | High 'MainMol' Ueq as Compared to Neighbors of   |                | 02 Check     |
| PLAT242_ALERT_2_C | Low 'MainMol' Ueq as Compared to Neighbors of    |                | C13 Check    |
| PLAT334_ALERT_2_C | Small Aver. Benzene C-C Dist C7                  | -C12           | 1.37 Ang.    |
| PLAT342_ALERT_3_C | Low Bond Precision on C-C Bonds .....            |                | 0.01536 Ang. |
| PLAT414_ALERT_2_C | Short Intra D-H..H-X H3A                         | ..H17A .       | 1.96 Ang.    |
|                   |                                                  | x,y,z =        | 1_555 Check  |
| PLAT430_ALERT_2_C | Short Inter D...A Contact O4                     | ..O4 .         | 2.85 Ang.    |
|                   |                                                  | -1-x,2-y,-z =  | 3_475 Check  |
| PLAT906_ALERT_3_C | Large K Value in the Analysis of Variance .....  |                | 3.209 Check  |
| PLAT911_ALERT_3_C | Missing FCF Refl Between Thmin & STh/L=          | 0.600          | 12 Report    |

## ● Alert level G

FORMU01\_ALERT\_2\_G There is a discrepancy between the atom counts in the  
 \_chemical\_formula\_sum and the formula from the \_atom\_site\* data.  
 Atom count from \_chemical\_formula\_sum: C24 H20 Br2 Hg1 N4 O4  
 Atom count from the \_atom\_site data: C24 H18.5 Br2 Hg1 N4 O4  
 CELLZ01\_ALERT\_1\_G Difference between formula and atom\_site contents detected.  
 CELLZ01\_ALERT\_1\_G WARNING: H atoms missing from atom site list. Is this intentional?  
 From the CIF: \_cell\_formula\_units\_Z 4  
 From the CIF: \_chemical\_formula\_sum C24 H20 Br2 Hg N4 O4  
 TEST: Compare cell contents of formula and atom\_site data

| atom | Z*formula | cif sites | diff |
|------|-----------|-----------|------|
| C    | 96.00     | 96.00     | 0.00 |
| H    | 80.00     | 74.00     | 6.00 |
| Br   | 8.00      | 8.00      | 0.00 |
| Hg   | 4.00      | 4.00      | 0.00 |
| N    | 16.00     | 16.00     | 0.00 |
| O    | 16.00     | 16.00     | 0.00 |

|                   |                                                   |        |        |
|-------------------|---------------------------------------------------|--------|--------|
| PLAT004_ALERT_5_G | Polymeric Structure Found with Maximum Dimension  | 1      | Info   |
| PLAT007_ALERT_5_G | Number of Unrefined Donor-H Atoms .....           | 4      | Report |
| PLAT045_ALERT_1_G | Calculated and Reported Z Differ by a Factor ...  | 0.500  | Check  |
| PLAT083_ALERT_2_G | SHELXL Second Parameter in WGHT Unusually Large   | 13.76  | Why ?  |
| PLAT300_ALERT_4_G | Atom Site Occupancy of O4 Constrained at          | 0.75   | Check  |
| PLAT300_ALERT_4_G | Atom Site Occupancy of O4' Constrained at         | 0.25   | Check  |
| PLAT300_ALERT_4_G | Atom Site Occupancy of H4'A Constrained at        | 0.25   | Check  |
| PLAT300_ALERT_4_G | Atom Site Occupancy of H4'B Constrained at        | 0.25   | Check  |
| PLAT302_ALERT_4_G | Anion/Solvent/Minor-Residue Disorder (Resd 2 )    | 100%   | Note   |
| PLAT302_ALERT_4_G | Anion/Solvent/Minor-Residue Disorder (Resd 3 )    | 100%   | Note   |
| PLAT311_ALERT_2_G | Isolated Disordered Oxygen Atom (No H's ?) .....  | 04     | Check  |
| PLAT415_ALERT_2_G | Short Inter D-H..H-X H15A ..H4'B .                | 0.78   | Ang.   |
|                   | x, 3/2-y, 1/2+z =                                 | 4_576  | Check  |
| PLAT415_ALERT_2_G | Short Inter D-H..H-X H17A ..H4'A .                | 2.08   | Ang.   |
|                   | -1-x, 2-y, -z =                                   | 3_475  | Check  |
| PLAT415_ALERT_2_G | Short Inter D-H..H-X H18A ..H4'A .                | 1.47   | Ang.   |
|                   | -1-x, 2-y, -z =                                   | 3_475  | Check  |
| PLAT432_ALERT_2_G | Short Inter X...Y Contact O4' ..C15 .             | 2.47   | Ang.   |
|                   | x, 3/2-y, -1/2+z =                                | 4_575  | Check  |
| PLAT432_ALERT_2_G | Short Inter X...Y Contact O4' ..C17 .             | 2.72   | Ang.   |
|                   | -1-x, 2-y, -z =                                   | 3_475  | Check  |
| PLAT432_ALERT_2_G | Short Inter X...Y Contact O4' ..C18 .             | 2.76   | Ang.   |
|                   | -1-x, 2-y, -z =                                   | 3_475  | Check  |
| PLAT720_ALERT_4_G | Number of Unusual/Non-Standard Labels .....       | 2      | Note   |
| PLAT870_ALERT_4_G | ALERTS Related to Twinning Effects Suppressed ..  | !      | Info   |
| PLAT883_ALERT_1_G | No Info/Value for _atom_sites_solution_primary .  | Please | Do !   |
| PLAT910_ALERT_3_G | Missing # of FCF Reflection(s) Below Theta(Min) . | 1      | Note   |
| PLAT931_ALERT_5_G | CIFcalcFCF Twin Law ( 1 0 0) Est.d BASF           | 0.17   | Check  |
| PLAT933_ALERT_2_G | Number of HKL-OMIT Records in Embedded .res File  | 1      | Note   |
| PLAT941_ALERT_3_G | Average HKL Measurement Multiplicity .....        | 1.0    | Low    |
| PLAT965_ALERT_2_G | The SHELXL WEIGHT Optimisation has not Converged  | Please | Check  |

---

0 **ALERT level A** = Most likely a serious problem - resolve or explain  
 0 **ALERT level B** = A potentially serious problem, consider carefully  
 11 **ALERT level C** = Check. Ensure it is not caused by an omission or oversight  
 28 **ALERT level G** = General information/check it is not something unexpected

7 ALERT type 1 CIF construction/syntax error, inconsistent or missing data

16 ALERT type 2 Indicator that the structure model may be wrong or deficient  
5 ALERT type 3 Indicator that the structure quality may be low  
8 ALERT type 4 Improvement, methodology, query or suggestion  
3 ALERT type 5 Informative message, check

---

## Datablock: 9

---

Bond precision: C-C = 0.0091 Å Wavelength=0.71073

Cell: a=18.052(3) b=14.386(3) c=10.1560(18)  
alpha=90 beta=91.810(7) gamma=90

Temperature: 296 K

|                        | Calculated                | Reported            |
|------------------------|---------------------------|---------------------|
| Volume                 | 2636.2(8)                 | 2636.3(8)           |
| Space group            | P 21/c                    | P 21/c              |
| Hall group             | -P 2ybc                   | -P 2ybc             |
| Moiety formula         | C24 H18 Hg I2 N4 O3, H2 O | ?                   |
| Sum formula            | C24 H20 Hg I2 N4 O4       | C24 H20 Hg I2 N4 O4 |
| Mr                     | 882.83                    | 882.83              |
| Dx, g cm <sup>-3</sup> | 2.224                     | 2.224               |
| Z                      | 4                         | 4                   |
| Mu (mm <sup>-1</sup> ) | 8.217                     | 8.217               |
| F000                   | 1640.0                    | 1640.0              |
| F000'                  | 1627.71                   |                     |
| h, k, lmax             | 24, 19, 13                | 24, 19, 13          |
| Nref                   | 6583                      | 6571                |
| Tmin, Tmax             | 0.106, 0.193              | 0.385, 0.746        |
| Tmin'                  | 0.068                     |                     |

Correction method= # Reported T Limits: Tmin=0.385 Tmax=0.746  
AbsCorr = MULTI\_SCAN

Data completeness= 0.998 Theta(max)= 28.350

R(reflections)= 0.0396( 5056) wR2(reflections)=  
0.1008( 6571)

S = 1.034 Npar= 316

---

The following ALERTS were generated. Each ALERT has the format  
**test-name\_ALERT\_alert-type\_alert-level.**  
Click on the hyperlinks for more details of the test.

---

### ● Alert level C

|                   |       |                                           |       |              |
|-------------------|-------|-------------------------------------------|-------|--------------|
| PLAT241_ALERT_2_C | High  | 'MainMol' Ueq as Compared to Neighbors of | O2    | Check        |
| PLAT241_ALERT_2_C | High  | 'MainMol' Ueq as Compared to Neighbors of | C22   | Check        |
| PLAT242_ALERT_2_C | Low   | 'MainMol' Ueq as Compared to Neighbors of | C13   | Check        |
| PLAT260_ALERT_2_C | Large | Average Ueq of Residue Including          | O4    | 0.145 Check  |
| PLAT342_ALERT_3_C | Low   | Bond Precision on C-C Bonds .....         |       | 0.00914 Ang. |
| PLAT414_ALERT_2_C | Short | Intra D-H..H-X H3A ..H17A .               |       | 1.94 Ang.    |
|                   |       | x,y,z =                                   | 1_555 | Check        |
| PLAT906_ALERT_3_C | Large | K Value in the Analysis of Variance ..... |       | 2.570 Check  |
| PLAT971_ALERT_2_C | Check | Calcd Resid. Dens. 0.89Ang From I2        |       | 1.68 eA-3    |
| PLAT976_ALERT_2_C | Check | Calcd Resid. Dens. 0.59Ang From O4 .      |       | -0.45 eA-3   |
| PLAT977_ALERT_2_C | Check | Negative Difference Density on H4C .      |       | -0.37 eA-3   |
| PLAT977_ALERT_2_C | Check | Negative Difference Density on H4D .      |       | -0.33 eA-3   |

---

### ● Alert level G

|                   |                                                  |     |              |
|-------------------|--------------------------------------------------|-----|--------------|
| PLAT004_ALERT_5_G | Polymeric Structure Found with Maximum Dimension | 1   | Info         |
| PLAT007_ALERT_5_G | Number of Unrefined Donor-H Atoms .....          | 4   | Report       |
| PLAT232_ALERT_2_G | Hirshfeld Test Diff (M-X) Hg --I2 .              | 6.3 | s.u.         |
| PLAT883_ALERT_1_G | No Info/Value for _atom_sites_solution_primary . |     | Please Do !  |
| PLAT910_ALERT_3_G | Missing # of FCF Reflection(s) Below Theta(Min). | 1   | Note         |
| PLAT912_ALERT_4_G | Missing # of FCF Reflections Above STh/L= 0.600  | 12  | Note         |
| PLAT941_ALERT_3_G | Average HKL Measurement Multiplicity .....       | 4.0 | Low          |
| PLAT965_ALERT_2_G | The SHELXL WEIGHT Optimisation has not Converged |     | Please Check |
| PLAT978_ALERT_2_G | Number C-C Bonds with Positive Residual Density. | 1   | Info         |

- 
- 0 **ALERT level A** = Most likely a serious problem - resolve or explain  
0 **ALERT level B** = A potentially serious problem, consider carefully  
11 **ALERT level C** = Check. Ensure it is not caused by an omission or oversight  
9 **ALERT level G** = General information/check it is not something unexpected

- 1 ALERT type 1 CIF construction/syntax error, inconsistent or missing data  
12 ALERT type 2 Indicator that the structure model may be wrong or deficient  
4 ALERT type 3 Indicator that the structure quality may be low  
1 ALERT type 4 Improvement, methodology, query or suggestion  
2 ALERT type 5 Informative message, check
- 
-

It is advisable to attempt to resolve as many as possible of the alerts in all categories. Often the minor alerts point to easily fixed oversights, errors and omissions in your CIF or refinement strategy, so attention to these fine details can be worthwhile. In order to resolve some of the more serious problems it may be necessary to carry out additional measurements or structure refinements. However, the purpose of your study may justify the reported deviations and the more serious of these should normally be commented upon in the discussion or experimental section of a paper or in the "special\_details" fields of the CIF. checkCIF was carefully designed to identify outliers and unusual parameters, but every test has its limitations and alerts that are not important in a particular case may appear. Conversely, the absence of alerts does not guarantee there are no aspects of the results needing attention. It is up to the individual to critically assess their own results and, if necessary, seek expert advice.

### **Publication of your CIF in IUCr journals**

A basic structural check has been run on your CIF. These basic checks will be run on all CIFs submitted for publication in IUCr journals (*Acta Crystallographica*, *Journal of Applied Crystallography*, *Journal of Synchrotron Radiation*); however, if you intend to submit to *Acta Crystallographica Section C* or *E* or *IUCrData*, you should make sure that full publication checks are run on the final version of your CIF prior to submission.

### **Publication of your CIF in other journals**

Please refer to the *Notes for Authors* of the relevant journal for any special instructions relating to CIF submission.
