# Supplementary material for: Structural Diversity of Mercury(II) Halide Complexes Containing Bis-pyridyl-bis-amide with Bulky and Angular Backbones: Ligand Effect and Metal Sensing
Source: Int J Mol Sci. 2022 Jul 16;23(14):7861. doi: 10.3390/ijms23147861 (PMC9323401; doi:10.3390/ijms23147861)
Supplement: Supplementary file 1 [file ijms-23-07861-s001.zip › allcif.cif]

 
data_1 
  
_audit_creation_method            'SHELXL-2017/1' 
_shelx_SHELXL_version_number      '2017/1' 
_chemical_name_systematic         ? 
_chemical_name_common             ? 
_chemical_melting_point           ? 
_chemical_formula_moiety          ? 
_chemical_formula_sum 
 'C44 H32 Cl2 Hg N8 O8' 
_chemical_formula_weight          1072.26 
  
loop_ 
 _atom_type_symbol 
 _atom_type_description 
 _atom_type_scat_dispersion_real 
 _atom_type_scat_dispersion_imag 
 _atom_type_scat_source 
 'C'  'C'   0.0033   0.0016 
 'International Tables Vol C Tables 4.2.6.8 and 6.1.1.4' 
 'H'  'H'   0.0000   0.0000 
 'International Tables Vol C Tables 4.2.6.8 and 6.1.1.4' 
 'Cl'  'Cl'   0.1484   0.1585 
 'International Tables Vol C Tables 4.2.6.8 and 6.1.1.4' 
 'Hg'  'Hg'  -2.3894   9.2266 
 'International Tables Vol C Tables 4.2.6.8 and 6.1.1.4' 
 'N'  'N'   0.0061   0.0033 
 'International Tables Vol C Tables 4.2.6.8 and 6.1.1.4' 
 'O'  'O'   0.0106   0.0060 
 'International Tables Vol C Tables 4.2.6.8 and 6.1.1.4' 
  
_space_group_crystal_system       triclinic 
_space_group_IT_number            2 
_space_group_name_H-M_alt         'P -1' 
_space_group_name_Hall            '-P 1' 
  
_shelx_space_group_comment 
; 
The symmetry employed for this shelxl refinement is uniquely defined 
by the following loop, which should always be used as a source of 
symmetry information in preference to the above space-group names. 
They are only intended as comments. 
; 
  
loop_ 
 _space_group_symop_operation_xyz 
 'x, y, z' 
 '-x, -y, -z' 
  
_cell_length_a                    8.7814(14) 
_cell_length_b                    10.5498(16) 
_cell_length_c                    10.9631(16) 
_cell_angle_alpha                 85.121(4) 
_cell_angle_beta                  74.166(4) 
_cell_angle_gamma                 81.889(4) 
_cell_volume                      966.2(3) 
_cell_formula_units_Z             1 
_cell_measurement_temperature     100(2) 
_cell_measurement_reflns_used     9845 
_cell_measurement_theta_min       2.43 
_cell_measurement_theta_max       28.36 
  
_exptl_crystal_description        block 
_exptl_crystal_colour             colourless 
_exptl_crystal_density_meas       ? 
_exptl_crystal_density_method     ? 
_exptl_crystal_density_diffrn     1.843 
_exptl_crystal_F_000              530 
_exptl_transmission_factor_min    ? 
_exptl_transmission_factor_max    ? 
_exptl_crystal_size_max           0.400 
_exptl_crystal_size_mid           0.200 
_exptl_crystal_size_min           0.200 
_exptl_absorpt_coefficient_mu     4.192 
_shelx_estimated_absorpt_T_min    0.285 
_shelx_estimated_absorpt_T_max    0.488 
_exptl_absorpt_correction_type    multi_scan 
_exptl_absorpt_correction_T_min   0.5077   
_exptl_absorpt_correction_T_max   0.7457
_exptl_absorpt_process_details     'sadabs v2008/1(bruker axs, 2008)' 
_exptl_absorpt_special_details    ? 
_diffrn_ambient_temperature       100(2) 
_diffrn_radiation_wavelength      0.71073 
_diffrn_radiation_type            MoK\a 
_diffrn_source                    ? 
_diffrn_measurement_device_type   'Bruker APEX-II CCD' 
_diffrn_measurement_method        '\f and \w scans' 
_diffrn_detector_area_resol_mean  ? 
_diffrn_reflns_number             22133 
_diffrn_reflns_av_unetI/netI      0.0234 
_diffrn_reflns_av_R_equivalents   0.0350 
_diffrn_reflns_limit_h_min        -11 
_diffrn_reflns_limit_h_max        11 
_diffrn_reflns_limit_k_min        -14 
_diffrn_reflns_limit_k_max        14 
_diffrn_reflns_limit_l_min        -14 
_diffrn_reflns_limit_l_max        13 
_diffrn_reflns_theta_min          1.933 
_diffrn_reflns_theta_max          28.364 
_diffrn_reflns_theta_full         25.242 
_diffrn_measured_fraction_theta_max   0.998 
_diffrn_measured_fraction_theta_full  1.000 
_diffrn_reflns_Laue_measured_fraction_max    0.998 
_diffrn_reflns_Laue_measured_fraction_full   1.000 
_diffrn_reflns_point_group_measured_fraction_max   0.998 
_diffrn_reflns_point_group_measured_fraction_full  1.000 
_reflns_number_total              4816 
_reflns_number_gt                 4815 
_reflns_threshold_expression      'I > 2\s(I)' 
_reflns_Friedel_coverage          0.000 
_reflns_Friedel_fraction_max      . 
_reflns_Friedel_fraction_full     . 
  
_reflns_special_details 
; 
 Reflections were merged by SHELXL according to the crystal 
 class for the calculation of statistics and refinement. 
  
 _reflns_Friedel_fraction is defined as the number of unique 
 Friedel pairs measured divided by the number that would be 
 possible theoretically, ignoring centric projections and 
 systematic absences. 
; 
  
_computing_data_collection        'Bruker APEX2' 
_computing_cell_refinement        'Bruker SAINT' 
_computing_data_reduction         'Bruker SAINT' 
_computing_structure_solution     'SHELXS-97 (Sheldrick 2008)' 
_computing_structure_refinement 'SHELXL-2017/1 (Sheldrick, 2017)' 
_computing_molecular_graphics     'Bruker SHELXTL' 
_computing_publication_material   'Bruker SHELXTL' 
_refine_special_details           ? 
_refine_ls_structure_factor_coef  Fsqd 
_refine_ls_matrix_type            full 
_refine_ls_weighting_scheme       calc 
_refine_ls_weighting_details 
'w=1/[\s^2^(Fo^2^)+(0.0141P)^2^+0.4522P] where P=(Fo^2^+2Fc^2^)/3' 
_atom_sites_solution_primary      ? 
_atom_sites_solution_secondary    ? 
_atom_sites_solution_hydrogens    geom 
_refine_ls_hydrogen_treatment     constr 
_refine_ls_extinction_method      none 
_refine_ls_extinction_coef        . 
_refine_ls_number_reflns          4816 
_refine_ls_number_parameters      286 
_refine_ls_number_restraints      0 
_refine_ls_R_factor_all           0.0142 
_refine_ls_R_factor_gt            0.0142 
_refine_ls_wR_factor_ref          0.0368 
_refine_ls_wR_factor_gt           0.0368 
_refine_ls_goodness_of_fit_ref    1.088 
_refine_ls_restrained_S_all       1.088 
_refine_ls_shift/su_max           0.001 
_refine_ls_shift/su_mean          0.000 
  
loop_ 
 _atom_site_label 
 _atom_site_type_symbol 
 _atom_site_fract_x 
 _atom_site_fract_y 
 _atom_site_fract_z 
 _atom_site_U_iso_or_equiv 
 _atom_site_adp_type 
 _atom_site_occupancy 
 _atom_site_site_symmetry_order 
 _atom_site_calc_flag 
 _atom_site_refinement_flags_posn 
 _atom_site_refinement_flags_adp 
 _atom_site_refinement_flags_occupancy 
 _atom_site_disorder_assembly 
 _atom_site_disorder_group 
Hg Hg 0.000000 1.000000 0.500000 0.01201(3) Uani 1 2 d S . P . . 
Cl Cl 0.07335(4) 1.18672(4) 0.38812(4) 0.01548(7) Uani 1 1 d . . . . . 
O1 O 0.46270(14) 0.75162(11) 0.79180(11) 0.0141(2) Uani 1 1 d . . . . . 
O2 O 0.68843(13) 0.51398(11) 0.44398(10) 0.0124(2) Uani 1 1 d . . . . . 
O3 O 1.00801(13) 0.12936(11) 0.74357(11) 0.0126(2) Uani 1 1 d . . . . . 
O4 O 0.84418(13) 0.40098(11) 1.07023(11) 0.0149(2) Uani 1 1 d . . . . . 
N1 N 0.31267(15) 0.90043(12) 0.45836(13) 0.0122(2) Uani 1 1 d . . . . . 
N2 N 0.56002(15) 0.65418(12) 0.60067(12) 0.0092(2) Uani 1 1 d . . . . . 
N3 N 0.95405(14) 0.25314(12) 0.91709(12) 0.0099(2) Uani 1 1 d . . . . . 
N4 N 1.37329(16) 0.24255(14) 0.91792(14) 0.0168(3) Uani 1 1 d . . . . . 
C1 C 0.63654(18) 0.81510(15) 0.42768(14) 0.0115(3) Uani 1 1 d . . . . . 
H1B H 0.746392 0.785477 0.417376 0.014 Uiso 1 1 calc R U . . . 
C2 C 0.58771(18) 0.91588(15) 0.35085(14) 0.0125(3) Uani 1 1 d . . . . . 
H2A H 0.663808 0.956596 0.286358 0.015 Uiso 1 1 calc R U . . . 
C3 C 0.42581(19) 0.95563(15) 0.37035(14) 0.0123(3) Uani 1 1 d . . . . . 
H3A H 0.393326 1.025518 0.318764 0.015 Uiso 1 1 calc R U . . . 
C4 C 0.35915(18) 0.80356(14) 0.53212(14) 0.0108(3) Uani 1 1 d . . . . . 
H4B H 0.280488 0.763561 0.594917 0.013 Uiso 1 1 calc R U . . . 
C5 C 0.51971(17) 0.75954(14) 0.51954(14) 0.0092(3) Uani 1 1 d . . . . . 
C6 C 0.63457(16) 0.53508(14) 0.55532(14) 0.0090(3) Uani 1 1 d . . . . . 
C7 C 0.63091(17) 0.44106(14) 0.66842(14) 0.0086(3) Uani 1 1 d . . . . . 
H7A H 0.558252 0.376101 0.668444 0.010 Uiso 1 1 calc R U . . . 
C8 C 0.79781(16) 0.37184(14) 0.66996(13) 0.0089(3) Uani 1 1 d . . . . . 
H8A H 0.846538 0.320163 0.593452 0.011 Uiso 1 1 calc R U . . . 
C9 C 0.76837(17) 0.28582(14) 0.79439(14) 0.0086(3) Uani 1 1 d . . . . . 
H9A H 0.689500 0.225895 0.794950 0.010 Uiso 1 1 calc R U . . . 
C10 C 0.92291(17) 0.21136(14) 0.81032(14) 0.0092(3) Uani 1 1 d . . . . . 
C11 C 0.83681(17) 0.34836(14) 0.97918(14) 0.0096(3) Uani 1 1 d . . . . . 
C12 C 0.70754(17) 0.37082(14) 0.90968(14) 0.0089(3) Uani 1 1 d . . . . . 
H12A H 0.605248 0.344796 0.965790 0.011 Uiso 1 1 calc R U . . . 
C13 C 0.68406(17) 0.51365(14) 0.86459(14) 0.0089(3) Uani 1 1 d . . . . . 
H13A H 0.645659 0.570784 0.937890 0.011 Uiso 1 1 calc R U . . . 
C14 C 0.56107(17) 0.52232(14) 0.78553(14) 0.0087(3) Uani 1 1 d . . . . . 
H14A H 0.461343 0.489431 0.838716 0.010 Uiso 1 1 calc R U . . . 
C15 C 0.52042(17) 0.65690(14) 0.73288(14) 0.0096(3) Uani 1 1 d . . . . . 
C16 C 0.90138(17) 0.47117(15) 0.68036(14) 0.0108(3) Uani 1 1 d . . . . . 
H16A H 1.000888 0.480500 0.620702 0.013 Uiso 1 1 calc R U . . . 
C17 C 0.84257(17) 0.54451(14) 0.77941(14) 0.0106(3) Uani 1 1 d . . . . . 
H17A H 0.896026 0.611067 0.795354 0.013 Uiso 1 1 calc R U . . . 
C18 C 1.09916(17) 0.21432(14) 0.95212(14) 0.0103(3) Uani 1 1 d . . . . . 
C19 C 1.10693(19) 0.12094(16) 1.04765(16) 0.0151(3) Uani 1 1 d . . . . . 
H19A H 1.016079 0.080713 1.092142 0.018 Uiso 1 1 calc R U . . . 
C20 C 1.2530(2) 0.08838(16) 1.07588(17) 0.0177(3) Uani 1 1 d . . . . . 
H20A H 1.264625 0.024267 1.140099 0.021 Uiso 1 1 calc R U . . . 
C21 C 1.38082(19) 0.15075(16) 1.00904(17) 0.0170(3) Uani 1 1 d . . . . . 
H21A H 1.480086 0.127109 1.028911 0.020 Uiso 1 1 calc R U . . . 
C22 C 1.23276(18) 0.27364(15) 0.89053(15) 0.0137(3) Uani 1 1 d . . . . . 
H22A H 1.224127 0.338766 0.826519 0.016 Uiso 1 1 calc R U . . . 
  
loop_ 
 _atom_site_aniso_label 
 _atom_site_aniso_U_11 
 _atom_site_aniso_U_22 
 _atom_site_aniso_U_33 
 _atom_site_aniso_U_23 
 _atom_site_aniso_U_13 
 _atom_site_aniso_U_12 
Hg 0.01205(4) 0.00934(4) 0.01349(5) 0.00338(3) -0.00273(3) -0.00111(3) 
Cl 0.01510(16) 0.01122(16) 0.01742(18) 0.00539(13) -0.00158(14) -0.00162(13) 
O1 0.0185(5) 0.0114(5) 0.0112(5) -0.0024(4) -0.0037(4) 0.0029(4) 
O2 0.0126(5) 0.0154(5) 0.0086(5) -0.0016(4) -0.0027(4) 0.0006(4) 
O3 0.0135(5) 0.0116(5) 0.0122(5) -0.0020(4) -0.0038(4) 0.0019(4) 
O4 0.0158(5) 0.0182(6) 0.0113(5) -0.0039(4) -0.0054(4) 0.0009(4) 
N1 0.0131(6) 0.0104(6) 0.0141(6) 0.0002(5) -0.0058(5) -0.0005(5) 
N2 0.0103(5) 0.0094(6) 0.0079(6) 0.0000(4) -0.0033(4) 0.0001(4) 
N3 0.0088(5) 0.0122(6) 0.0088(6) 0.0002(5) -0.0034(4) 0.0001(4) 
N4 0.0120(6) 0.0177(7) 0.0226(7) -0.0044(6) -0.0062(5) -0.0028(5) 
C1 0.0116(6) 0.0132(7) 0.0101(7) -0.0019(5) -0.0033(5) -0.0013(5) 
C2 0.0150(7) 0.0128(7) 0.0094(7) 0.0002(5) -0.0017(5) -0.0040(5) 
C3 0.0179(7) 0.0103(7) 0.0100(7) 0.0008(5) -0.0065(6) -0.0018(5) 
C4 0.0117(6) 0.0099(7) 0.0113(7) -0.0001(5) -0.0035(5) -0.0022(5) 
C5 0.0126(6) 0.0082(6) 0.0081(6) -0.0009(5) -0.0049(5) -0.0006(5) 
C6 0.0076(6) 0.0103(7) 0.0102(7) -0.0007(5) -0.0043(5) -0.0009(5) 
C7 0.0089(6) 0.0090(6) 0.0084(6) -0.0009(5) -0.0033(5) -0.0010(5) 
C8 0.0084(6) 0.0108(6) 0.0070(6) -0.0005(5) -0.0020(5) 0.0006(5) 
C9 0.0086(6) 0.0081(6) 0.0089(6) -0.0001(5) -0.0024(5) -0.0005(5) 
C10 0.0098(6) 0.0084(6) 0.0094(6) 0.0021(5) -0.0026(5) -0.0028(5) 
C11 0.0091(6) 0.0106(7) 0.0083(6) 0.0023(5) -0.0016(5) -0.0015(5) 
C12 0.0087(6) 0.0104(6) 0.0070(6) 0.0007(5) -0.0016(5) -0.0007(5) 
C13 0.0107(6) 0.0087(6) 0.0075(6) -0.0008(5) -0.0032(5) -0.0003(5) 
C14 0.0086(6) 0.0093(6) 0.0080(6) -0.0004(5) -0.0023(5) 0.0000(5) 
C15 0.0092(6) 0.0114(7) 0.0087(7) 0.0003(5) -0.0036(5) -0.0012(5) 
C16 0.0089(6) 0.0131(7) 0.0098(7) 0.0044(5) -0.0028(5) -0.0018(5) 
C17 0.0117(6) 0.0107(7) 0.0114(7) 0.0027(5) -0.0062(5) -0.0037(5) 
C18 0.0097(6) 0.0115(7) 0.0105(7) -0.0026(5) -0.0045(5) 0.0010(5) 
C19 0.0150(7) 0.0159(7) 0.0152(8) 0.0014(6) -0.0061(6) -0.0020(6) 
C20 0.0206(8) 0.0156(8) 0.0194(8) -0.0002(6) -0.0118(6) 0.0020(6) 
C21 0.0135(7) 0.0165(8) 0.0242(8) -0.0085(6) -0.0113(6) 0.0039(6) 
C22 0.0131(7) 0.0140(7) 0.0149(7) -0.0012(6) -0.0049(6) -0.0017(6) 
  
_geom_special_details 
; 
 All esds (except the esd in the dihedral angle between two l.s. planes) 
 are estimated using the full covariance matrix.  The cell esds are taken 
 into account individually in the estimation of esds in distances, angles 
 and torsion angles; correlations between esds in cell parameters are only 
 used when they are defined by crystal symmetry.  An approximate (isotropic) 
 treatment of cell esds is used for estimating esds involving l.s. planes. 
; 
  
loop_ 
 _geom_bond_atom_site_label_1 
 _geom_bond_atom_site_label_2 
 _geom_bond_distance 
 _geom_bond_site_symmetry_2 
 _geom_bond_publ_flag 
Hg Cl 2.3055(5) . ? 
Hg Cl 2.3056(5) 2_576 ? 
O1 C15 1.2087(19) . ? 
O2 C6 1.2103(18) . ? 
O3 C10 1.2121(18) . ? 
O4 C11 1.2035(19) . ? 
N1 C4 1.3368(19) . ? 
N1 C3 1.342(2) . ? 
N2 C6 1.3968(18) . ? 
N2 C15 1.3970(19) . ? 
N2 C5 1.4299(18) . ? 
N3 C10 1.3913(19) . ? 
N3 C11 1.4051(18) . ? 
N3 C18 1.4255(18) . ? 
N4 C22 1.339(2) . ? 
N4 C21 1.339(2) . ? 
C1 C5 1.384(2) . ? 
C1 C2 1.393(2) . ? 
C1 H1B 0.9500 . ? 
C2 C3 1.387(2) . ? 
C2 H2A 0.9500 . ? 
C3 H3A 0.9500 . ? 
C4 C5 1.394(2) . ? 
C4 H4B 0.9500 . ? 
C6 C7 1.517(2) . ? 
C7 C14 1.539(2) . ? 
C7 C8 1.5462(19) . ? 
C7 H7A 1.0000 . ? 
C8 C16 1.511(2) . ? 
C8 C9 1.554(2) . ? 
C8 H8A 1.0000 . ? 
C9 C10 1.5147(19) . ? 
C9 C12 1.542(2) . ? 
C9 H9A 1.0000 . ? 
C11 C12 1.5135(19) . ? 
C12 C13 1.549(2) . ? 
C12 H12A 1.0000 . ? 
C13 C17 1.511(2) . ? 
C13 C14 1.5477(19) . ? 
C13 H13A 1.0000 . ? 
C14 C15 1.519(2) . ? 
C14 H14A 1.0000 . ? 
C16 C17 1.330(2) . ? 
C16 H16A 0.9500 . ? 
C17 H17A 0.9500 . ? 
C18 C19 1.384(2) . ? 
C18 C22 1.388(2) . ? 
C19 C20 1.390(2) . ? 
C19 H19A 0.9500 . ? 
C20 C21 1.381(3) . ? 
C20 H20A 0.9500 . ? 
C21 H21A 0.9500 . ? 
C22 H22A 0.9500 . ? 
  
loop_ 
 _geom_angle_atom_site_label_1 
 _geom_angle_atom_site_label_2 
 _geom_angle_atom_site_label_3 
 _geom_angle 
 _geom_angle_site_symmetry_1 
 _geom_angle_site_symmetry_3 
 _geom_angle_publ_flag 
Cl Hg Cl 180.0 . 2_576 ? 
C4 N1 C3 118.06(13) . . ? 
C6 N2 C15 113.24(12) . . ? 
C6 N2 C5 122.85(12) . . ? 
C15 N2 C5 123.79(12) . . ? 
C10 N3 C11 113.52(12) . . ? 
C10 N3 C18 123.35(12) . . ? 
C11 N3 C18 122.76(12) . . ? 
C22 N4 C21 117.10(15) . . ? 
C5 C1 C2 117.80(14) . . ? 
C5 C1 H1B 121.1 . . ? 
C2 C1 H1B 121.1 . . ? 
C3 C2 C1 118.70(14) . . ? 
C3 C2 H2A 120.6 . . ? 
C1 C2 H2A 120.6 . . ? 
N1 C3 C2 123.37(14) . . ? 
N1 C3 H3A 118.3 . . ? 
C2 C3 H3A 118.3 . . ? 
N1 C4 C5 121.89(14) . . ? 
N1 C4 H4B 119.1 . . ? 
C5 C4 H4B 119.1 . . ? 
C1 C5 C4 120.17(14) . . ? 
C1 C5 N2 121.17(13) . . ? 
C4 C5 N2 118.64(13) . . ? 
O2 C6 N2 124.17(14) . . ? 
O2 C6 C7 127.72(13) . . ? 
N2 C6 C7 108.10(12) . . ? 
C6 C7 C14 105.06(11) . . ? 
C6 C7 C8 112.93(12) . . ? 
C14 C7 C8 110.43(11) . . ? 
C6 C7 H7A 109.4 . . ? 
C14 C7 H7A 109.4 . . ? 
C8 C7 H7A 109.4 . . ? 
C16 C8 C7 108.38(12) . . ? 
C16 C8 C9 108.42(12) . . ? 
C7 C8 C9 104.56(11) . . ? 
C16 C8 H8A 111.7 . . ? 
C7 C8 H8A 111.7 . . ? 
C9 C8 H8A 111.7 . . ? 
C10 C9 C12 105.05(12) . . ? 
C10 C9 C8 111.00(12) . . ? 
C12 C9 C8 109.58(11) . . ? 
C10 C9 H9A 110.4 . . ? 
C12 C9 H9A 110.4 . . ? 
C8 C9 H9A 110.4 . . ? 
O3 C10 N3 124.28(13) . . ? 
O3 C10 C9 127.52(14) . . ? 
N3 C10 C9 108.20(12) . . ? 
O4 C11 N3 124.10(13) . . ? 
O4 C11 C12 128.25(13) . . ? 
N3 C11 C12 107.65(12) . . ? 
C11 C12 C9 105.38(11) . . ? 
C11 C12 C13 110.16(12) . . ? 
C9 C12 C13 110.14(12) . . ? 
C11 C12 H12A 110.4 . . ? 
C9 C12 H12A 110.4 . . ? 
C13 C12 H12A 110.4 . . ? 
C17 C13 C14 109.52(12) . . ? 
C17 C13 C12 106.97(11) . . ? 
C14 C13 C12 105.39(12) . . ? 
C17 C13 H13A 111.6 . . ? 
C14 C13 H13A 111.6 . . ? 
C12 C13 H13A 111.6 . . ? 
C15 C14 C7 105.22(11) . . ? 
C15 C14 C13 113.57(12) . . ? 
C7 C14 C13 109.55(11) . . ? 
C15 C14 H14A 109.5 . . ? 
C7 C14 H14A 109.5 . . ? 
C13 C14 H14A 109.5 . . ? 
O1 C15 N2 124.36(14) . . ? 
O1 C15 C14 127.64(14) . . ? 
N2 C15 C14 108.00(12) . . ? 
C17 C16 C8 114.88(13) . . ? 
C17 C16 H16A 122.6 . . ? 
C8 C16 H16A 122.6 . . ? 
C16 C17 C13 114.71(13) . . ? 
C16 C17 H17A 122.6 . . ? 
C13 C17 H17A 122.6 . . ? 
C19 C18 C22 120.17(14) . . ? 
C19 C18 N3 120.93(14) . . ? 
C22 C18 N3 118.89(13) . . ? 
C18 C19 C20 117.35(15) . . ? 
C18 C19 H19A 121.3 . . ? 
C20 C19 H19A 121.3 . . ? 
C21 C20 C19 118.93(15) . . ? 
C21 C20 H20A 120.5 . . ? 
C19 C20 H20A 120.5 . . ? 
N4 C21 C20 123.95(14) . . ? 
N4 C21 H21A 118.0 . . ? 
C20 C21 H21A 118.0 . . ? 
N4 C22 C18 122.48(15) . . ? 
N4 C22 H22A 118.8 . . ? 
C18 C22 H22A 118.8 . . ? 
  
_refine_diff_density_max    0.440 
_refine_diff_density_min   -0.639 
_refine_diff_density_rms    0.075 
  
_shelx_res_file 
; 
TITL 12551_0m.res in P-1 
    12551_0m.res 
    created by SHELXL-2017/1 at 16:56:03 on 14-Oct-2021 
CELL  0.71073   8.7814  10.5498  10.9631   85.121   74.166   81.889 
ZERR    1.000   0.0014   0.0016   0.0016    0.004    0.004    0.004 
LATT  1 
SFAC C H CL HG N O 
UNIT 44 32 2 1 8 8 
TEMP -173.15 
SIZE 0.200 0.200 0.400 
  
L.S. 10 
BOND $H 
LIST 6 
FMAP 2 
PLAN 20 
ACTA 
  
WGHT    0.014100    0.452200 
FVAR       0.53966 
HG    4    0.000000    1.000000    0.500000    10.50000    0.01205    0.00934 = 
         0.01349    0.00338   -0.00273   -0.00111 
CL    3    0.073353    1.186718    0.388119    11.00000    0.01510    0.01122 = 
         0.01742    0.00539   -0.00158   -0.00162 
O1    6    0.462701    0.751617    0.791798    11.00000    0.01853    0.01144 = 
         0.01120   -0.00244   -0.00370    0.00292 
O2    6    0.688433    0.513982    0.443976    11.00000    0.01257    0.01539 = 
         0.00864   -0.00159   -0.00268    0.00063 
O3    6    1.008009    0.129358    0.743568    11.00000    0.01355    0.01159 = 
         0.01218   -0.00197   -0.00379    0.00195 
O4    6    0.844182    0.400984    1.070232    11.00000    0.01580    0.01824 = 
         0.01132   -0.00393   -0.00536    0.00091 
N1    5    0.312674    0.900433    0.458356    11.00000    0.01306    0.01035 = 
         0.01405    0.00022   -0.00576   -0.00053 
N2    5    0.560024    0.654177    0.600673    11.00000    0.01034    0.00938 = 
         0.00793    0.00000   -0.00326    0.00013 
N3    5    0.954054    0.253141    0.917092    11.00000    0.00877    0.01222 = 
         0.00880    0.00025   -0.00339    0.00013 
N4    5    1.373286    0.242551    0.917915    11.00000    0.01201    0.01770 = 
         0.02265   -0.00439   -0.00621   -0.00277 
C1    1    0.636538    0.815103    0.427680    11.00000    0.01156    0.01318 = 
         0.01011   -0.00195   -0.00329   -0.00127 
AFIX  43 
H1B   2    0.746392    0.785477    0.417376    11.00000   -1.20000 
AFIX   0 
C2    1    0.587715    0.915877    0.350854    11.00000    0.01502    0.01277 = 
         0.00942    0.00017   -0.00170   -0.00400 
AFIX  43 
H2A   2    0.663808    0.956596    0.286358    11.00000   -1.20000 
AFIX   0 
C3    1    0.425806    0.955634    0.370350    11.00000    0.01791    0.01035 = 
         0.01004    0.00082   -0.00652   -0.00185 
AFIX  43 
H3A   2    0.393326    1.025518    0.318764    11.00000   -1.20000 
AFIX   0 
C4    1    0.359152    0.803557    0.532120    11.00000    0.01166    0.00994 = 
         0.01135   -0.00011   -0.00347   -0.00222 
AFIX  43 
H4B   2    0.280488    0.763561    0.594917    11.00000   -1.20000 
AFIX   0 
C5    1    0.519709    0.759543    0.519543    11.00000    0.01260    0.00815 = 
         0.00812   -0.00086   -0.00487   -0.00061 
C6    1    0.634566    0.535078    0.555321    11.00000    0.00758    0.01031 = 
         0.01020   -0.00070   -0.00432   -0.00087 
C7    1    0.630912    0.441057    0.668425    11.00000    0.00894    0.00899 = 
         0.00843   -0.00089   -0.00331   -0.00097 
AFIX  13 
H7A   2    0.558252    0.376101    0.668444    11.00000   -1.20000 
AFIX   0 
C8    1    0.797805    0.371842    0.669961    11.00000    0.00842    0.01082 = 
         0.00704   -0.00049   -0.00205    0.00061 
AFIX  13 
H8A   2    0.846538    0.320163    0.593452    11.00000   -1.20000 
AFIX   0 
C9    1    0.768374    0.285818    0.794393    11.00000    0.00859    0.00808 = 
         0.00887   -0.00008   -0.00237   -0.00051 
AFIX  13 
H9A   2    0.689500    0.225895    0.794950    11.00000   -1.20000 
AFIX   0 
C10   1    0.922912    0.211362    0.810315    11.00000    0.00975    0.00837 = 
         0.00942    0.00209   -0.00256   -0.00276 
C11   1    0.836812    0.348359    0.979180    11.00000    0.00913    0.01057 = 
         0.00830    0.00228   -0.00164   -0.00149 
C12   1    0.707542    0.370821    0.909683    11.00000    0.00873    0.01043 = 
         0.00698    0.00071   -0.00157   -0.00073 
AFIX  13 
H12A  2    0.605248    0.344796    0.965790    11.00000   -1.20000 
AFIX   0 
C13   1    0.684059    0.513652    0.864585    11.00000    0.01074    0.00875 = 
         0.00755   -0.00079   -0.00318   -0.00028 
AFIX  13 
H13A  2    0.645659    0.570784    0.937890    11.00000   -1.20000 
AFIX   0 
C14   1    0.561071    0.522317    0.785525    11.00000    0.00863    0.00929 = 
         0.00800   -0.00043   -0.00227   -0.00004 
AFIX  13 
H14A  2    0.461343    0.489431    0.838716    11.00000   -1.20000 
AFIX   0 
C15   1    0.520423    0.656897    0.732881    11.00000    0.00917    0.01143 = 
         0.00870    0.00028   -0.00356   -0.00123 
C16   1    0.901378    0.471169    0.680361    11.00000    0.00887    0.01306 = 
         0.00979    0.00437   -0.00276   -0.00183 
AFIX  43 
H16A  2    1.000888    0.480500    0.620702    11.00000   -1.20000 
AFIX   0 
C17   1    0.842570    0.544514    0.779414    11.00000    0.01167    0.01069 = 
         0.01137    0.00274   -0.00624   -0.00373 
AFIX  43 
H17A  2    0.896026    0.611067    0.795354    11.00000   -1.20000 
AFIX   0 
C18   1    1.099161    0.214318    0.952120    11.00000    0.00966    0.01152 = 
         0.01045   -0.00259   -0.00451    0.00095 
C19   1    1.106931    0.120940    1.047649    11.00000    0.01495    0.01594 = 
         0.01523    0.00137   -0.00605   -0.00197 
AFIX  43 
H19A  2    1.016079    0.080713    1.092142    11.00000   -1.20000 
AFIX   0 
C20   1    1.252954    0.088380    1.075878    11.00000    0.02062    0.01555 = 
         0.01939   -0.00019   -0.01183    0.00200 
AFIX  43 
H20A  2    1.264625    0.024267    1.140099    11.00000   -1.20000 
AFIX   0 
C21   1    1.380823    0.150753    1.009041    11.00000    0.01353    0.01647 = 
         0.02422   -0.00848   -0.01129    0.00391 
AFIX  43 
H21A  2    1.480086    0.127109    1.028911    11.00000   -1.20000 
AFIX   0 
C22   1    1.232758    0.273642    0.890526    11.00000    0.01311    0.01402 = 
         0.01487   -0.00116   -0.00490   -0.00171 
AFIX  43 
H22A  2    1.224127    0.338766    0.826519    11.00000   -1.20000 
  
AFIX   0 
HKLF 4 
  
  
  
  
REM  12551_0m.res in P-1 
REM R1 =  0.0142 for    4815 Fo > 4sig(Fo)  and  0.0142 for all    4816 data 
REM    286 parameters refined using      0 restraints 
  
END 
  
WGHT      0.0141      0.4522 
  
REM Highest difference peak  0.440,  deepest hole -0.639,  1-sigma level  0.075 
Q1    1   0.1014  0.9881  0.4996  11.00000  0.05    0.44 
Q2    1   0.7129  0.4055  0.6651  11.00000  0.05    0.43 
Q3    1   0.8448  0.2449  0.8014  11.00000  0.05    0.41 
Q4    1   0.6405  0.4880  0.6065  11.00000  0.05    0.40 
Q5    1   0.7676  0.3554  0.9432  11.00000  0.05    0.39 
Q6    1   0.4389  0.7758  0.5260  11.00000  0.05    0.37 
Q7    1   0.5402  0.5857  0.7529  11.00000  0.05    0.36 
Q8    1   0.7349  0.3268  0.8512  11.00000  0.05    0.35 
Q9    1   0.5988  0.4888  0.7226  11.00000  0.05    0.35 
Q10   1   0.7866  0.3324  0.7312  11.00000  0.05    0.35 
Q11   1   0.6191  0.5181  0.8224  11.00000  0.05    0.34 
Q12   1   1.0202  0.2304  0.9310  11.00000  0.05    0.33 
Q13   1   0.5280  0.6538  0.6635  11.00000  0.05    0.32 
Q14   1   0.5042  0.9242  0.3555  11.00000  0.05    0.31 
Q15   1   1.1819  0.1050  1.0578  11.00000  0.05    0.31 
Q16   1   0.5964  0.5997  0.5746  11.00000  0.05    0.31 
Q17   1   1.1135  0.1551  0.9848  11.00000  0.05    0.31 
Q18   1   0.8445  0.4236  0.6785  11.00000  0.05    0.30 
Q19   1   0.6064  0.8792  0.4068  11.00000  0.05    0.29 
Q20   1   0.9060  0.2974  0.9458  11.00000  0.05    0.28 
; 
_shelx_res_checksum    8691 
  
_shelx_hkl_file 
; 
  -1   0   0  592.89   27.81 
  -1   0   0  647.24   27.94 
  -1   0   0  641.08   27.60 
  -1   0   0  652.11   27.69 
  -1   0   0  621.50   27.57 
  -1   0   0  643.61   27.55 
   1   0   0  637.46   27.57 
   1   0   0  619.09   27.69 
   1   0   0  649.47   27.54 
   1   0   0  694.39   27.95 
  -2   0   0 2459.41  106.65 
  -2   0   0 2588.29  107.90 
  -2   0   0 2566.81  106.42 
   2   0   0 2716.63  107.10 
   2   0   0 2342.75  106.45 
   2   0   0 2326.99  106.66 
   2   0   0 2614.90  107.16 
   2   0   0 2145.72  106.60 
   2   0   0 2520.56  106.80 
  -3   0   0 2122.77   91.95 
  -3   0   0 2065.99   92.16 
  -3   0   0 2100.22   91.82 
   3   0   0 2121.34   91.90 
   3   0   0 2159.36   91.82 
   3   0   0 2094.21   91.73 
   3   0   0 2260.57   92.15 
  -4   0   0  322.86   15.35 
  -4   0   0  350.27   15.71 
  -4   0   0  326.24   15.47 
   4   0   0  331.63   15.03 
   4   0   0  383.19   15.13 
   4   0   0  331.30   15.14 
   4   0   0  345.18   15.26 
  -5   0   0  549.28   24.04 
  -5   0   0  525.77   23.73 
   5   0   0  522.51   23.56 
   5   0   0  516.43   23.39 
   5   0   0  537.14   23.25 
  -6   0   0  469.28   21.74 
  -6   0   0  459.20   21.86 
  -6   0   0  481.72   21.99 
   6   0   0  482.56   21.03 
   6   0   0  486.32   21.48 
   6   0   0  475.85   21.24 
  -7   0   0  185.76   10.91 
  -7   0   0  208.17   10.93 
  -7   0   0  203.47   11.27 
   7   0   0  216.44   10.26 
   7   0   0  230.27    9.95 
   7   0   0  225.33   10.63 
  -8   0   0  267.42   14.28 
  -8   0   0  286.50   14.04 
  -8   0   0  242.07   13.98 
   8   0   0  272.09   13.04 
   8   0   0  280.54   12.65 
   8   0   0  283.70   13.28 
  -9   0   0  318.20   16.32 
  -9   0   0  316.60   16.63 
   9   0   0  316.25   15.12 
   9   0   0  307.42   15.33 
 -10   0   0  221.59   12.89 
 -10   0   0  196.73   12.99 
  10   0   0  212.99   11.59 
  10   0   0  233.34   11.51 
 -11   0   0  390.19   21.01 
 -11   0   0  449.28   21.71 
  11   0   0  405.34   19.56 
  11   0   0  384.46   19.76 
  11  -1   0  207.77   11.97 
  11  -1   0  198.49   11.19 
 -11   1   0  197.99   13.17 
 -11   1   0  189.75   12.56 
  10  -1   0  189.02   10.47 
  10  -1   0  187.52   11.05 
 -10   1   0  197.75   11.76 
 -10   1   0  178.75   12.10 
   9  -1   0  324.79   14.89 
   9  -1   0  323.20   15.82 
   9  -1   0  330.84   15.46 
  -9   1   0  320.79   16.45 
  -9   1   0  290.16   16.28 
   8  -1   0  312.29   14.49 
   8  -1   0  294.42   13.92 
   8  -1   0  281.82   14.12 
  -8   1   0  298.65   15.16 
  -8   1   0  319.27   15.65 
   7  -1   0   93.09    5.16 
   7  -1   0   92.55    5.80 
   7  -1   0   90.20    5.44 
  -7   1   0   88.86    6.10 
  -7   1   0   89.18    6.11 
  -7   1   0   84.27    6.50 
   6  -1   0  279.10   12.67 
   6  -1   0  277.17   12.22 
   6  -1   0  272.60   12.45 
  -6   1   0  266.40   12.89 
  -6   1   0  229.26   13.05 
  -6   1   0  268.46   13.08 
   5  -1   0 1387.63   58.32 
   5  -1   0 1431.68   58.23 
  -5   1   0 1323.94   58.61 
  -5   1   0 1196.98   58.70 
  -5   1   0 1376.71   58.43 
   4  -1   0 1798.69   79.17 
   4  -1   0 1813.74   79.24 
  -4   1   0 1908.84   79.70 
  -4   1   0 1885.31   79.77 
  -4   1   0 1766.59   79.46 
   3  -1   0 4452.13  204.16 
   3  -1   0 4639.08  203.63 
   3  -1   0 4777.27  202.78 
  -3   1   0 4663.37  202.54 
  -3   1   0 5029.40  205.31 
   2  -1   0 2218.46  106.86 
   2  -1   0 2436.43  106.86 
   2  -1   0 2345.32  106.82 
   2  -1   0 2482.58  106.85 
   2  -1   0 2758.40  108.46 
   2  -1   0 2609.08  107.11 
  -2   1   0 2527.93  106.85 
  -2   1   0 2390.12  108.39 
  -2   1   0 2217.80  106.85 
  -2   1   0 2749.22  107.14 
  -2   1   0 2593.43  108.51 
   1  -1   0 2800.17  123.73 
   1  -1   0 2760.21  124.13 
   1  -1   0 2679.11  124.71 
   1  -1   0 2765.44  125.01 
  -1   1   0 3025.22  124.71 
  -1   1   0 3151.71  124.56 
  -1   1   0 2861.33  124.15 
  -1   1   0 2969.18  125.45 
   0  -1   0  331.16   15.35 
   0  -1   0  370.30   15.54 
   0  -1   0  344.23   15.56 
   0  -1   0  345.26   15.59 
   0  -1   0  364.55   15.42 
   0   1   0  377.89   15.41 
   0   1   0  355.74   15.57 
   0   1   0  376.98   15.42 
   0   1   0  341.34   15.35 
  -1  -1   0 2307.05   94.00 
  -1  -1   0 2413.92   95.04 
  -1  -1   0 2100.92   93.74 
  -1  -1   0 2099.23   94.62 
  -1  -1   0 2001.69   94.06 
   1   1   0 2174.13   94.17 
   1   1   0 2104.44   93.97 
   1   1   0 2097.27   94.17 
   1   1   0 2241.25   93.96 
   1   1   0 2267.74   94.99 
  -2  -1   0 3285.46  153.09 
  -2  -1   0 3753.56  152.43 
  -2  -1   0 3436.34  152.07 
   2   1   0 3459.84  152.44 
   2   1   0 3746.84  152.34 
   2   1   0 3502.61  153.13 
  -3  -1   0  750.33   34.27 
  -3  -1   0  760.80   34.08 
  -3  -1   0  700.02   34.16 
  -3  -1   0  774.46   33.86 
   3   1   0  775.75   34.00 
   3   1   0  810.00   33.81 
   3   1   0  800.31   33.76 
   3   1   0  815.64   33.81 
   3   1   0  803.64   34.02 
   3   1   0  791.57   33.86 
   3   1   0  818.39   33.82 
  -4  -1   0 1196.80   47.49 
  -4  -1   0 1021.09   47.48 
  -4  -1   0  971.34   47.22 
   4   1   0 1168.75   47.20 
   4   1   0 1140.79   46.99 
   4   1   0 1135.06   46.84 
   4   1   0  963.42   46.86 
  -5  -1   0  700.36   30.64 
  -5  -1   0  652.36   30.66 
  -5  -1   0  638.46   30.80 
   5   1   0  714.66   30.18 
   5   1   0  667.66   30.04 
   5   1   0  735.94   30.00 
   5   1   0  714.85   30.43 
  -6  -1   0  137.49    7.68 
  -6  -1   0  136.65    7.27 
  -6  -1   0  131.73    7.39 
   6   1   0  135.23    6.59 
   6   1   0  126.67    6.23 
   6   1   0  125.39    6.95 
  -7  -1   0  853.39   40.53 
  -7  -1   0  895.50   40.57 
  -7  -1   0  911.42   40.77 
   7   1   0  946.49   40.15 
   7   1   0  903.43   39.42 
   7   1   0  925.83   39.75 
  -8  -1   0  876.07   42.10 
  -8  -1   0  924.66   42.16 
  -8  -1   0  879.48   42.20 
   8   1   0  963.83   41.58 
   8   1   0  967.79   40.73 
   8   1   0  983.90   41.17 
  -9  -1   0  361.49   17.73 
  -9  -1   0  349.21   17.81 
   9   1   0  341.48   16.48 
   9   1   0  349.49   17.08 
  10   1   0  563.46   26.21 
  10   1   0  552.68   25.69 
  11   1   0  196.15   11.24 
  11   1   0  172.96   12.34 
  11   1   0  174.85   10.10 
  10  -2   0  171.21    9.65 
  10  -2   0  168.16    9.75 
 -10   2   0  144.04   11.19 
 -10   2   0  172.81   11.06 
   9  -2   0  382.36   17.60 
   9  -2   0  375.15   18.34 
   9  -2   0  381.03   18.07 
  -9   2   0  374.54   19.01 
  -9   2   0  376.02   19.09 
   8  -2   0  375.10   17.84 
   8  -2   0  380.40   17.45 
   8  -2   0  388.36   17.67 
  -8   2   0  377.27   18.94 
  -8   2   0  372.43   18.47 
   7  -2   0 1019.18   44.71 
   7  -2   0 1042.85   44.91 
   7  -2   0  994.28   44.49 
  -7   2   0  978.95   45.45 
  -7   2   0 1040.63   45.37 
   6  -2   0 1823.84   78.14 
   6  -2   0 1817.28   78.27 
  -6   2   0 1820.57   79.02 
  -6   2   0 1806.52   78.75 
  -6   2   0 1810.77   78.96 
  -6   2   0 1731.66   78.32 
   5  -2   0  791.29   33.66 
   5  -2   0  811.10   33.73 
  -5   2   0  721.61   34.32 
  -5   2   0  725.55   33.73 
  -5   2   0  749.79   34.10 
  -5   2   0  800.09   34.36 
   4  -2   0  640.62   27.04 
   4  -2   0  571.36   26.98 
   4  -2   0  644.33   27.00 
  -4   2   0  578.08   27.46 
  -4   2   0  638.53   27.40 
  -4   2   0  626.54   27.53 
  -4   2   0  605.40   27.04 
   3  -2   0 2708.26  109.51 
   3  -2   0 2589.16  109.48 
  -3   2   0 2513.27  109.52 
  -3   2   0 2558.38  109.91 
  -3   2   0 2329.55  109.79 
   2  -2   0 1401.52   65.50 
   2  -2   0 1509.63   65.32 
   2  -2   0 1446.77   65.26 
   2  -2   0 1621.12   65.33 
   2  -2   0 1451.74   65.31 
  -2   2   0 1609.57   65.73 
  -2   2   0 1585.15   65.62 
  -2   2   0 1370.86   65.55 
  -2   2   0 1534.52   65.33 
  -2   2   0 1604.39   65.36 
   1  -2   0 2980.71  120.16 
   1  -2   0 2807.94  120.31 
   1  -2   0 2702.99  120.38 
   1  -2   0 2770.52  119.90 
  -1   2   0 2679.87  120.10 
  -1   2   0 2781.26  121.02 
  -1   2   0 2788.86  120.11 
   0  -2   0  309.40   15.54 
   0  -2   0  327.95   15.17 
   0  -2   0  357.78   15.22 
   0  -2   0  362.25   15.45 
   0  -2   0  375.86   15.56 
   0   2   0  337.26   15.50 
   0   2   0  361.70   15.09 
   0   2   0  350.78   15.60 
   0   2   0  351.99   15.20 
   0   2   0  346.19   15.45 
   0   2   0  348.62   15.18 
  -1  -2   0   59.04    2.68 
  -1  -2   0   56.18    3.36 
  -1  -2   0   57.53    3.27 
  -1  -2   0   58.97    2.79 
  -1  -2   0   60.96    3.23 
  -1  -2   0   68.15    3.08 
   1   2   0   58.90    3.10 
   1   2   0   58.95    2.99 
   1   2   0   62.52    2.65 
   1   2   0   58.83    2.79 
   1   2   0   68.96    3.33 
   1   2   0   51.54    3.28 
  -2  -2   0  141.93    6.64 
  -2  -2   0  137.42    6.74 
  -2  -2   0  147.90    6.37 
  -2  -2   0  148.55    6.58 
  -2  -2   0  138.51    6.09 
   2   2   0  136.87    6.56 
   2   2   0  142.82    6.41 
   2   2   0  138.15    6.61 
   2   2   0  141.42    6.12 
   2   2   0  130.44    6.10 
   2   2   0  126.42    6.61 
  -3  -2   0 1076.97   51.32 
  -3  -2   0 1118.24   51.84 
  -3  -2   0 1210.70   52.02 
  -3  -2   0 1269.83   51.42 
  -3  -2   0 1198.59   51.66 
   3   2   0 1211.21   51.42 
   3   2   0 1145.19   51.35 
   3   2   0 1189.80   51.93 
   3   2   0 1218.02   51.68 
   3   2   0 1288.01   51.72 
  -4  -2   0  294.01   14.59 
  -4  -2   0  319.23   14.48 
  -4  -2   0  300.39   13.92 
   4   2   0  307.75   14.19 
   4   2   0  324.37   13.94 
   4   2   0  316.36   13.96 
   4   2   0  333.58   13.86 
   4   2   0  330.32   13.78 
   4   2   0  311.67   14.63 
  -5  -2   0 1067.13   47.35 
   5   2   0 1003.82   46.63 
   5   2   0 1097.53   46.79 
   5   2   0 1069.33   46.56 
   5   2   0 1109.92   47.13 
   5   2   0 1130.97   47.58 
  -6  -2   0  648.48   32.35 
   6   2   0  758.80   31.50 
   6   2   0  770.37   32.22 
   6   2   0  746.74   31.80 
   6   2   0  705.37   31.59 
   7   2   0 2415.44  105.35 
   7   2   0 2427.48  105.98 
   7   2   0 2444.63  104.98 
   7   2   0 2422.74  104.61 
  -8  -2   0  234.13   15.20 
   8   2   0  228.69   10.85 
   8   2   0  240.27   12.90 
   8   2   0  243.09   11.41 
   8   2   0  245.89   12.06 
   9   2   0  581.55   26.78 
   9   2   0  586.23   26.18 
   9   2   0  569.94   27.67 
 -10  -2   0  602.83   30.93 
  10   2   0  680.79   30.22 
  10   2   0  690.94   31.53 
  10   2   0  656.06   29.59 
 -11  -2   0  108.56    8.93 
  11   2   0  104.23    6.97 
  11   2   0   90.08    9.39 
  11   2   0  116.49    8.45 
  10  -3   0  292.45   14.43 
  10  -3   0  300.26   14.56 
 -10   3   0  256.99   15.34 
 -10   3   0  267.57   15.64 
   9  -3   0  450.49   20.71 
   9  -3   0  466.98   21.18 
   9  -3   0  449.78   21.36 
  -9   3   0  452.43   22.51 
  -9   3   0  420.45   21.98 
   8  -3   0  462.28   20.44 
   8  -3   0  452.51   20.91 
   8  -3   0  442.48   20.66 
  -8   3   0  446.06   21.64 
  -8   3   0  418.76   21.40 
   7  -3   0 1102.06   46.05 
   7  -3   0 1132.51   45.98 
  -7   3   0  924.26   46.71 
  -7   3   0 1055.97   46.77 
  -7   3   0  996.79   46.08 
   6  -3   0  689.95   29.86 
   6  -3   0  664.40   29.92 
  -6   3   0  700.19   30.79 
  -6   3   0  705.31   30.01 
  -6   3   0  593.74   30.54 
  -6   3   0  685.72   30.59 
   5  -3   0 2320.74   99.86 
   5  -3   0 2312.38   99.83 
  -5   3   0 2146.24   99.86 
  -5   3   0 2431.44  100.62 
  -5   3   0 2328.21  100.45 
   4  -3   0 1985.31   92.38 
   4  -3   0 2069.77   92.04 
   4  -3   0 2157.48   92.09 
  -4   3   0 2359.84   92.86 
  -4   3   0 2209.64   92.69 
  -4   3   0 2189.59   92.66 
  -4   3   0 1936.98   92.06 
   3  -3   0   51.50    3.68 
   3  -3   0   52.93    3.21 
   3  -3   0   50.93    3.13 
  -3   3   0   53.41    3.07 
  -3   3   0   54.34    3.84 
  -3   3   0   58.71    3.92 
  -3   3   0   49.96    3.44 
   2  -3   0  319.56   14.39 
   2  -3   0  313.56   14.29 
   2  -3   0  307.76   14.83 
  -2   3   0  356.55   15.04 
  -2   3   0  301.62   14.33 
  -2   3   0  334.47   14.92 
  -2   3   0  323.35   14.76 
   1  -3   0  299.61   13.70 
   1  -3   0  332.30   14.38 
   1  -3   0  315.86   13.76 
   1  -3   0  299.47   13.83 
   1  -3   0  341.17   14.24 
   1  -3   0  316.85   13.84 
  -1   3   0  290.96   13.83 
  -1   3   0  316.05   14.18 
  -1   3   0  301.11   14.30 
  -1   3   0  335.14   14.49 
  -1   3   0  289.64   13.80 
   0  -3   0   43.50    2.37 
   0  -3   0   37.67    2.29 
   0  -3   0   39.80    2.07 
   0  -3   0   42.97    2.85 
   0  -3   0   43.48    2.94 
   0  -3   0   50.46    2.93 
   0   3   0   40.68    2.19 
   0   3   0   39.20    2.06 
   0   3   0   45.95    2.96 
   0   3   0   41.42    2.33 
   0   3   0   39.92    2.78 
   0   3   0   41.33    2.65 
  -1  -3   0  828.04   33.93 
  -1  -3   0  825.21   33.69 
  -1  -3   0  799.95   33.32 
   1   3   0  745.45   34.02 
   1   3   0  728.09   34.09 
   1   3   0  776.30   33.60 
   1   3   0  771.93   33.86 
   1   3   0  745.19   33.29 
   1   3   0  745.96   33.45 
  -2  -3   0  641.33   31.67 
  -2  -3   0  743.25   30.94 
  -2  -3   0  741.76   31.38 
  -2  -3   0  702.47   31.10 
  -2  -3   0  693.73   31.80 
  -2  -3   0  768.62   31.94 
   2   3   0  703.49   31.05 
   2   3   0  687.90   30.94 
   2   3   0  731.92   31.59 
   2   3   0  776.13   31.76 
   2   3   0  727.98   31.82 
   2   3   0  712.79   31.34 
  -3  -3   0   42.37    3.40 
  -3  -3   0   43.50    2.14 
  -3  -3   0   47.10    2.25 
   3   3   0   42.48    3.16 
   3   3   0   44.31    2.80 
   3   3   0   40.03    2.14 
   3   3   0   44.93    2.97 
   3   3   0   44.45    2.23 
  -4  -3   0 3072.00  123.58 
  -4  -3   0 2931.08  123.39 
  -4  -3   0 2806.33  122.56 
   4   3   0 2802.67  123.31 
   4   3   0 2816.58  122.96 
   4   3   0 2699.65  122.46 
   4   3   0 2830.25  122.96 
   4   3   0 2838.35  122.58 
  -5  -3   0  858.99   40.30 
  -5  -3   0  904.88   40.55 
   5   3   0  925.11   39.38 
   5   3   0  927.36   40.01 
   5   3   0  931.44   40.49 
   5   3   0  919.86   39.32 
   5   3   0  912.22   39.56 
  -6  -3   0  859.29   36.91 
  -6  -3   0  788.44   36.97 
   6   3   0  824.63   36.38 
   6   3   0  829.98   36.94 
   6   3   0  822.43   35.94 
   6   3   0  815.44   35.60 
  -7  -3   0 1044.30   45.75 
   7   3   0 1003.11   45.70 
   7   3   0 1002.54   45.03 
   7   3   0 1012.16   44.08 
   7   3   0 1033.19   44.52 
  -8  -3   0  338.83   17.16 
   8   3   0  352.14   15.71 
   8   3   0  327.61   16.35 
   8   3   0  346.06   17.29 
  -9  -3   0  182.00   11.04 
   9   3   0  183.18    9.46 
   9   3   0  193.01   10.86 
   9   3   0  179.93   10.27 
 -10  -3   0   99.61    8.02 
  10   3   0   99.58    7.54 
  10   3   0   94.92    7.69 
  10   3   0   94.15    6.10 
 -11  -3   0  100.39    8.88 
  11   3   0   90.10    9.32 
  11   3   0  109.42    8.29 
  10  -4   0  157.01    9.09 
  10  -4   0  165.27    9.82 
  10  -4   0  166.83   10.21 
 -10   4   0  147.57   10.78 
 -10   4   0  142.96   11.22 
   9  -4   0  606.63   27.93 
   9  -4   0  610.18   28.32 
   9  -4   0  587.96   27.74 
  -9   4   0  595.38   29.14 
  -9   4   0  650.92   29.69 
   8  -4   0  334.82   15.18 
   8  -4   0  309.26   14.81 
  -8   4   0  289.79   16.26 
  -8   4   0  299.22   16.11 
  -8   4   0  299.97   15.11 
   7  -4   0  106.92    6.48 
   7  -4   0  103.33    6.17 
  -7   4   0   99.23    7.27 
  -7   4   0   91.18    6.87 
  -7   4   0  101.26    6.04 
   6  -4   0  243.74   11.48 
   6  -4   0  241.72   11.26 
  -6   4   0  261.21   11.68 
  -6   4   0  207.21   12.28 
  -6   4   0  243.57   12.41 
  -6   4   0  210.41   12.24 
   5  -4   0  313.34   15.08 
   5  -4   0  335.49   15.16 
  -5   4   0  330.61   16.05 
  -5   4   0  334.66   16.18 
  -5   4   0  316.59   15.83 
  -5   4   0  344.37   15.23 
   4  -4   0  316.63   14.83 
   4  -4   0  290.56   14.15 
   4  -4   0  311.76   14.27 
  -4   4   0  326.65   14.25 
  -4   4   0  271.65   14.86 
  -4   4   0  330.40   14.99 
  -4   4   0  329.12   15.05 
   3  -4   0  729.48   33.14 
   3  -4   0  729.04   33.87 
   3  -4   0  782.76   33.30 
  -3   4   0  754.47   34.01 
  -3   4   0  791.31   34.01 
  -3   4   0  796.66   33.28 
  -3   4   0  717.90   33.68 
   2  -4   0 1061.03   44.88 
   2  -4   0 1065.11   45.05 
   2  -4   0 1004.10   45.65 
  -2   4   0 1153.09   45.03 
  -2   4   0  992.80   45.42 
  -2   4   0  943.05   45.64 
  -2   4   0 1019.30   45.63 
   1  -4   0  130.00    6.57 
   1  -4   0  133.76    7.31 
   1  -4   0  138.82    6.41 
   1  -4   0  127.94    6.33 
  -1   4   0  137.91    6.47 
  -1   4   0  155.28    7.50 
  -1   4   0  139.73    7.00 
  -1   4   0  139.89    7.27 
   0  -4   0 2086.09   88.32 
   0  -4   0 2054.93   89.01 
   0  -4   0 1911.24   88.34 
   0  -4   0 2075.97   89.14 
   0  -4   0 1910.42   88.10 
   0   4   0 2209.54   89.20 
   0   4   0 2176.51   88.52 
   0   4   0 1835.94   88.07 
   0   4   0 1982.00   88.76 
   0   4   0 2101.61   89.01 
   0   4   0 2176.90   88.34 
  -1  -4   0 1163.20   49.51 
  -1  -4   0 1067.57   49.52 
  -1  -4   0 1158.52   48.94 
  -1  -4   0 1244.13   48.52 
   1   4   0 1058.05   48.46 
   1   4   0 1197.60   49.51 
   1   4   0 1098.63   49.21 
   1   4   0 1049.56   48.78 
   1   4   0 1091.96   49.54 
   1   4   0 1124.95   48.68 
  -2  -4   0 1761.48   86.46 
  -2  -4   0 2208.71   86.82 
  -2  -4   0 2049.32   86.09 
  -2  -4   0 1950.40   85.89 
  -2  -4   0 2014.93   85.75 
   2   4   0 1961.50   86.26 
   2   4   0 2105.70   86.56 
   2   4   0 2026.62   85.96 
   2   4   0 1868.72   85.68 
   2   4   0 1952.20   85.67 
  -3  -4   0 2008.33   93.78 
  -3  -4   0 2144.17   92.86 
  -3  -4   0 2106.54   92.86 
  -3  -4   0 2128.47   93.77 
   3   4   0 2184.53   93.22 
   3   4   0 2206.86   92.76 
   3   4   0 2247.34   93.64 
   3   4   0 2165.36   92.85 
   3   4   0 2210.78   93.55 
  -4  -4   0 1602.69   66.48 
  -4  -4   0 1554.59   65.16 
  -4  -4   0 1356.12   65.18 
  -4  -4   0 1365.41   66.18 
   4   4   0 1541.78   65.22 
   4   4   0 1573.51   65.79 
   4   4   0 1620.16   66.24 
   4   4   0 1500.04   65.14 
  -5  -4   0  400.11   16.93 
  -5  -4   0  367.75   18.39 
  -5  -4   0  401.27   18.35 
   5   4   0  400.16   18.29 
   5   4   0  403.71   17.07 
   5   4   0  398.19   17.88 
   5   4   0  365.18   16.88 
   5   4   0  381.49   17.10 
   5   4   0  377.84   17.64 
  -6  -4   0  521.86   23.62 
   6   4   0  517.57   23.45 
   6   4   0  477.25   21.79 
   6   4   0  504.52   22.15 
   6   4   0  512.44   22.83 
   6   4   0  491.51   21.77 
  -7  -4   0  265.24   12.88 
  -7  -4   0  240.17   12.93 
   7   4   0  233.70   11.30 
   7   4   0  242.04   12.14 
   7   4   0  241.87   12.89 
  -8  -4   0  326.00   16.53 
   8   4   0  313.49   16.12 
   8   4   0  337.20   15.66 
   8   4   0  306.22   14.69 
  -9  -4   0  212.15   12.18 
   9   4   0  210.25   11.89 
   9   4   0  207.82   11.35 
   9   4   0  205.69   10.19 
 -10  -4   0   83.06    7.94 
  10   4   0   82.12    6.93 
  10   4   0   66.05    8.03 
 -11  -4   0   78.44    8.36 
  11   4   0   82.17    7.81 
  11   4   0   93.72    7.75 
   9  -5   0   37.68    4.80 
   9  -5   0   42.55    4.70 
   9  -5   0   43.11    5.09 
  -9   5   0   49.28    6.98 
  -9   5   0   34.74    6.07 
   8  -5   0  387.66   18.25 
   8  -5   0  377.95   18.39 
  -8   5   0  394.97   19.75 
  -8   5   0  396.63   18.55 
  -8   5   0  351.76   19.27 
   7  -5   0  101.82    6.56 
   7  -5   0  100.69    5.92 
  -7   5   0  105.92    6.70 
  -7   5   0   95.91    7.84 
  -7   5   0   89.83    7.70 
   6  -5   0  295.39   14.63 
   6  -5   0  293.77   14.62 
  -6   5   0  336.19   15.70 
  -6   5   0  310.04   15.74 
  -6   5   0  307.53   14.76 
   5  -5   0   83.02    4.95 
   5  -5   0   79.63    4.97 
  -5   5   0   92.91    6.70 
  -5   5   0   88.88    5.44 
  -5   5   0   86.67    5.86 
  -5   5   0   83.87    6.51 
   4  -5   0  105.19    5.87 
   4  -5   0   97.95    5.42 
  -4   5   0  114.42    6.78 
  -4   5   0  105.42    5.57 
  -4   5   0   97.03    6.66 
  -4   5   0  103.86    6.70 
   3  -5   0   36.95    3.94 
   3  -5   0   44.17    3.24 
   3  -5   0   35.92    2.84 
  -3   5   0   32.55    3.87 
  -3   5   0   36.25    3.02 
  -3   5   0   37.03    3.86 
   2  -5   0 1333.95   59.45 
   2  -5   0 1333.62   59.66 
   2  -5   0 1405.90   60.60 
  -2   5   0 1292.28   60.14 
  -2   5   0 1523.89   60.83 
  -2   5   0 1426.65   60.54 
  -2   5   0 1287.09   59.55 
   1  -5   0 2618.86  111.25 
   1  -5   0 2575.54  111.49 
  -1   5   0 2479.37  111.40 
  -1   5   0 2396.90  111.96 
  -1   5   0 2836.54  112.43 
   0  -5   0  926.05   43.70 
   0  -5   0  934.65   42.53 
   0  -5   0 1055.88   42.85 
   0  -5   0  998.72   42.51 
   0   5   0 1005.82   43.66 
   0   5   0  981.16   43.39 
   0   5   0  980.21   42.76 
   0   5   0  978.86   43.77 
  -1  -5   0 1327.49   61.30 
  -1  -5   0 1435.33   60.01 
  -1  -5   0 1446.07   60.31 
   1   5   0 1421.06   61.20 
   1   5   0 1378.79   60.93 
   1   5   0 1486.05   60.40 
   1   5   0 1252.75   59.93 
  -2  -5   0 1971.49   82.97 
  -2  -5   0 1730.25   83.86 
  -2  -5   0 2138.38   84.26 
  -2  -5   0 1942.86   82.65 
   2   5   0 2058.79   83.96 
   2   5   0 1979.97   83.15 
   2   5   0 1918.95   83.59 
   2   5   0 1721.91   82.56 
   2   5   0 1841.23   82.85 
  -3  -5   0 1797.98   88.53 
  -3  -5   0 1941.97   87.29 
  -3  -5   0 2096.32   87.52 
  -3  -5   0 2078.63   88.65 
   3   5   0 2010.81   87.35 
   3   5   0 2038.18   88.22 
   3   5   0 2156.43   88.47 
   3   5   0 2103.30   87.83 
  -4  -5   0  334.42   15.47 
  -4  -5   0  332.89   16.72 
  -4  -5   0  366.18   17.13 
   4   5   0  370.73   16.50 
   4   5   0  363.13   16.07 
   4   5   0  353.21   15.23 
   4   5   0  339.43   15.32 
   4   5   0  341.50   16.52 
  -5  -5   0 1375.91   60.64 
  -5  -5   0 1537.60   62.45 
  -5  -5   0 1430.46   62.23 
   5   5   0 1333.56   61.51 
   5   5   0 1419.98   61.92 
   5   5   0 1415.98   60.61 
   5   5   0 1380.34   61.42 
   5   5   0 1423.85   60.70 
   5   5   0 1343.69   60.56 
  -6  -5   0  384.76   19.18 
  -6  -5   0  444.00   19.42 
   6   5   0  409.66   18.47 
   6   5   0  403.32   19.13 
   6   5   0  368.13   17.20 
   6   5   0  399.98   17.57 
   6   5   0  380.07   17.54 
  -7  -5   0   82.65    6.58 
   7   5   0   74.52    4.27 
   7   5   0   67.09    5.44 
   7   5   0   74.61    5.74 
  -8  -5   0  128.71    9.17 
   8   5   0  140.67    7.47 
   8   5   0  148.73    8.84 
   8   5   0  145.66    8.37 
  -9  -5   0   62.45    6.82 
   9   5   0   59.36    7.16 
   9   5   0   69.37    6.08 
 -10  -5   0  163.35   10.92 
  10   5   0  153.70    9.93 
  10   5   0  155.80   11.23 
   9  -6   0  260.64   13.22 
   9  -6   0  244.72   13.25 
  -9   6   0  256.12   15.30 
  -9   6   0  253.40   13.71 
  -9   6   0  243.08   15.23 
   8  -6   0   19.28    3.86 
   8  -6   0   22.54    3.60 
  -8   6   0   18.69    3.90 
  -8   6   0   19.39    4.76 
  -8   6   0   24.14    4.54 
   7  -6   0  127.78    7.95 
   7  -6   0  126.38    8.00 
  -7   6   0  128.39    8.80 
  -7   6   0  137.13    9.74 
  -7   6   0  151.06    7.87 
   6  -6   0  443.03   21.76 
   6  -6   0  462.14   21.73 
  -6   6   0  497.48   23.19 
  -6   6   0  449.23   22.88 
  -6   6   0  506.67   21.94 
   5  -6   0  581.20   26.29 
   5  -6   0  594.37   26.37 
  -5   6   0  542.82   26.24 
  -5   6   0  606.80   27.32 
  -5   6   0  595.99   27.65 
   4  -6   0  727.53   32.56 
   4  -6   0  695.27   33.46 
   4  -6   0  703.07   32.32 
  -4   6   0  825.09   32.62 
  -4   6   0  699.46   33.31 
  -4   6   0  710.88   33.77 
  -4   6   0  754.38   33.70 
   3  -6   0 1294.00   56.63 
   3  -6   0 1408.95   58.05 
   3  -6   0 1397.18   56.92 
  -3   6   0 1209.35   57.80 
  -3   6   0 1212.10   56.70 
  -3   6   0 1229.99   57.95 
  -3   6   0 1359.54   57.64 
   2  -6   0 1268.53   55.81 
   2  -6   0 1247.87   54.40 
   2  -6   0 1243.15   54.65 
  -2   6   0 1280.56   55.72 
  -2   6   0 1287.54   54.57 
  -2   6   0 1126.30   55.19 
  -2   6   0 1306.70   55.98 
   1  -6   0  443.41   20.17 
   1  -6   0  416.61   21.56 
   1  -6   0  478.05   20.58 
  -1   6   0  479.34   21.63 
  -1   6   0  475.99   21.83 
  -1   6   0  439.78   20.41 
  -1   6   0  471.76   21.23 
   0  -6   0  956.79   43.31 
   0  -6   0  974.66   43.67 
   0  -6   0 1056.19   45.05 
   0   6   0  966.87   44.35 
   0   6   0  927.53   44.58 
   0   6   0 1121.22   43.72 
  -1  -6   0 2005.19   84.07 
  -1  -6   0 2060.29   82.35 
  -1  -6   0 1932.54   82.26 
  -1  -6   0 1882.13   82.67 
  -1  -6   0 1750.33   83.74 
   1   6   0 1847.19   83.64 
   1   6   0 1897.94   83.43 
   1   6   0 1903.00   82.71 
  -2  -6   0  735.43   32.68 
  -2  -6   0  783.25   34.55 
  -2  -6   0  748.51   33.08 
  -2  -6   0  684.35   34.21 
   2   6   0  776.09   33.93 
   2   6   0  768.76   34.19 
   2   6   0  797.46   33.28 
  -3  -6   0  823.13   36.85 
  -3  -6   0  838.32   38.31 
  -3  -6   0  888.09   38.31 
  -3  -6   0  795.73   36.25 
   3   6   0  874.77   37.15 
   3   6   0  842.17   37.94 
   3   6   0  853.46   37.67 
  -4  -6   0  146.08    7.29 
  -4  -6   0  152.99    9.10 
  -4  -6   0  160.72    9.11 
   4   6   0  158.80    8.43 
   4   6   0  151.98    7.85 
   4   6   0  144.99    8.21 
   4   6   0  154.84    7.05 
  -5  -6   0  178.09   10.25 
  -5  -6   0  197.10   10.65 
  -5  -6   0  161.88    8.38 
   5   6   0  181.40    8.06 
   5   6   0  207.65    8.13 
   5   6   0  181.57    9.79 
   5   6   0  179.02    9.33 
   5   6   0  193.26    9.77 
   5   6   0  174.90    8.25 
  -6  -6   0  375.10   17.68 
  -6  -6   0  434.10   20.12 
   6   6   0  393.06   18.69 
   6   6   0  395.44   19.25 
   6   6   0  408.60   17.61 
  -7  -6   0  492.79   25.01 
   7   6   0  526.99   24.73 
   7   6   0  549.92   24.17 
  -8  -6   0  367.65   19.33 
   8   6   0  373.86   18.22 
   8   6   0  390.48   18.96 
  -9  -6   0  369.72   19.54 
   9   6   0  387.25   19.62 
   9   6   0  363.74   18.36 
 -10  -6   0  397.17   20.92 
  10   6   0  408.42   20.62 
  10   6   0  381.08   19.63 
   9  -7   0  135.10    9.18 
  -9   7   0  136.30    9.30 
  -9   7   0  128.36    9.98 
  -9   7   0  129.04   11.11 
   8  -7   0  762.67   33.78 
   8  -7   0  738.48   33.72 
  -8   7   0  748.19   35.62 
  -8   7   0  760.12   33.88 
  -8   7   0  666.72   35.20 
   7  -7   0  844.67   37.98 
   7  -7   0  821.79   38.00 
  -7   7   0  902.87   39.94 
  -7   7   0  825.04   38.04 
  -7   7   0  816.97   39.42 
   6  -7   0  422.25   20.19 
   6  -7   0  416.36   20.03 
  -6   7   0  441.09   21.95 
  -6   7   0  407.56   21.12 
  -6   7   0  453.06   20.08 
   5  -7   0 1216.38   52.56 
   5  -7   0 1239.70   52.79 
  -5   7   0 1165.42   53.67 
  -5   7   0 1185.07   52.62 
  -5   7   0 1167.04   54.06 
   4  -7   0 1035.38   46.30 
   4  -7   0 1020.37   46.54 
  -4   7   0 1104.94   46.53 
  -4   7   0 1038.16   47.41 
  -4   7   0 1069.79   47.91 
   3  -7   0  876.39   42.65 
   3  -7   0  950.72   41.24 
   3  -7   0  959.06   41.51 
  -3   7   0  913.62   42.28 
  -3   7   0  910.01   42.72 
  -3   7   0  957.57   41.41 
  -3   7   0 1014.61   45.03 
   2  -7   0  664.60   29.14 
   2  -7   0  643.92   30.48 
   2  -7   0  696.83   28.85 
  -2   7   0  640.34   30.01 
  -2   7   0  624.76   30.54 
  -2   7   0  644.24   29.01 
   1  -7   0 2264.58   99.29 
   1  -7   0 2244.79   97.89 
  -1   7   0 2377.26   99.15 
  -1   7   0 2099.84   98.55 
  -1   7   0 2298.18   97.76 
   0  -7   0   62.90    3.50 
   0  -7   0   58.50    4.15 
   0  -7   0   61.13    5.15 
   0   7   0   70.74    5.57 
   0   7   0   76.11    4.12 
   0   7   0   53.14    5.16 
  -1  -7   0  553.96   27.36 
  -1  -7   0  580.74   25.89 
  -1  -7   0  552.35   25.41 
  -1  -7   0  583.57   25.36 
   1   7   0  591.18   26.83 
   1   7   0  585.22   25.88 
   1   7   0  630.94   27.28 
  -2  -7   0  574.51   25.55 
  -2  -7   0  540.72   23.36 
  -2  -7   0  500.85   25.41 
  -2  -7   0  559.43   23.47 
   2   7   0  559.46   25.03 
   2   7   0  524.17   24.06 
   2   7   0  512.15   25.14 
  -3  -7   0  424.94   20.81 
  -3  -7   0  427.26   20.96 
  -3  -7   0  401.72   19.18 
   3   7   0  434.99   20.25 
   3   7   0  434.55   19.45 
   3   7   0  447.29   20.56 
  -4  -7   0  422.86   20.64 
  -4  -7   0  445.35   20.82 
  -4  -7   0  432.98   18.83 
   4   7   0  430.26   19.20 
   4   7   0  401.59   19.89 
   4   7   0  380.32   19.94 
  -5  -7   0  828.36   41.64 
  -5  -7   0  884.80   39.77 
   5   7   0  991.69   40.53 
   5   7   0  952.01   41.27 
  -6  -7   0  725.62   33.90 
   6   7   0  724.46   33.22 
   6   7   0  704.87   32.34 
  -7  -7   0   64.71    6.90 
   7   7   0   71.28    5.66 
   7   7   0   76.34    6.95 
  -8  -7   0  860.16   40.51 
   8   7   0  858.71   38.98 
   8   7   0  867.90   39.81 
  -9  -7   0  471.34   23.71 
   9   7   0  436.53   21.83 
   9   7   0  448.58   22.70 
 -10  -7   0  265.33   16.19 
  10   7   0  257.19   15.81 
  10   7   0  262.01   14.33 
   8  -8   0  199.46   11.22 
   8  -8   0  197.73   11.67 
  -8   8   0  218.01   11.99 
  -8   8   0  214.07   13.08 
  -8   8   0  202.41   13.66 
   7  -8   0  546.44   24.99 
   7  -8   0  553.53   25.18 
  -7   8   0  526.40   27.07 
  -7   8   0  537.03   25.07 
  -7   8   0  527.37   26.55 
   6  -8   0 1069.57   47.76 
   6  -8   0 1093.23   48.00 
  -6   8   0 1126.93   50.00 
  -6   8   0 1006.08   47.87 
  -6   8   0 1087.34   49.44 
   5  -8   0  228.49   12.05 
   5  -8   0  236.95   12.48 
  -5   8   0  246.03   13.38 
  -5   8   0  242.02   14.15 
  -5   8   0  258.28   12.40 
   4  -8   0 1660.83   69.59 
   4  -8   0 1593.53   69.20 
  -4   8   0 1608.06   71.10 
  -4   8   0 1468.37   69.26 
  -4   8   0 1596.06   70.63 
   3  -8   0  306.68   14.83 
   3  -8   0  302.23   14.52 
  -3   8   0  340.38   14.88 
  -3   8   0  298.62   16.45 
  -3   8   0  314.67   15.85 
   2  -8   0  775.69   35.80 
   2  -8   0  721.69   33.69 
   2  -8   0  756.54   34.13 
  -2   8   0  777.68   35.67 
  -2   8   0  750.68   35.04 
  -2   8   0  812.13   34.06 
   1  -8   0  234.70   12.86 
   1  -8   0  214.96   11.07 
  -1   8   0  232.92   12.64 
  -1   8   0  207.89   12.05 
  -1   8   0  227.40   10.87 
   0  -8   0 1155.04   49.82 
   0  -8   0 1080.80   47.95 
   0  -8   0 1028.98   47.37 
   0   8   0 1119.30   49.41 
   0   8   0 1107.13   47.83 
   0   8   0 1059.57   48.80 
  -1  -8   0  676.61   30.10 
  -1  -8   0  699.51   32.59 
  -1  -8   0  695.76   30.75 
   1   8   0  655.66   30.62 
   1   8   0  741.34   32.32 
   1   8   0  678.14   31.72 
  -2  -8   0  386.62   17.24 
  -2  -8   0  404.29   17.37 
  -2  -8   0  416.56   20.09 
   2   8   0  350.48   19.25 
   2   8   0  399.11   19.22 
   2   8   0  413.56   18.11 
  -3  -8   0  687.74   32.33 
  -3  -8   0  730.52   34.40 
   3   8   0  703.60   33.34 
   3   8   0  756.65   32.56 
   3   8   0  776.96   33.96 
  -4  -8   0  763.79   32.67 
  -4  -8   0  665.85   30.29 
   4   8   0  643.15   31.39 
   4   8   0  659.05   30.54 
  -5  -8   0  548.27   26.50 
  -5  -8   0  559.80   28.72 
   5   8   0  634.47   27.18 
   5   8   0  666.46   28.29 
  -6  -8   0  668.62   31.78 
   6   8   0  657.19   30.00 
   6   8   0  655.45   30.98 
  -7  -8   0  859.58   41.98 
   7   8   0  914.09   40.39 
   7   8   0  924.06   41.30 
  -8  -8   0  347.25   19.00 
   8   8   0  335.60   17.13 
   8   8   0  357.78   18.60 
  -9  -8   0  563.64   27.50 
   9   8   0  517.94   26.58 
   9   8   0  503.91   25.12 
   7  -9   0  355.88   17.34 
   7  -9   0  362.85   17.74 
  -7   9   0  331.05   17.40 
  -7   9   0  358.55   18.94 
  -7   9   0  331.30   19.50 
   6  -9   0  367.83   18.30 
   6  -9   0  365.13   17.68 
  -6   9   0  390.75   17.94 
  -6   9   0  374.86   20.32 
  -6   9   0  347.03   19.74 
   5  -9   0   48.90    5.06 
   5  -9   0   59.08    5.81 
  -5   9   0   53.04    5.99 
  -5   9   0   52.14    8.21 
  -5   9   0   53.54    4.58 
   4  -9   0  160.73    9.05 
   4  -9   0  183.72    9.81 
  -4   9   0  161.37   10.37 
  -4   9   0  172.11    9.08 
  -4   9   0  179.20   11.66 
   3  -9   0  221.17   11.24 
   3  -9   0  225.50   11.59 
  -3   9   0  223.12   12.66 
  -3   9   0  254.79   13.92 
  -3   9   0  227.02   11.56 
   2  -9   0  288.43   13.94 
   2  -9   0  278.60   13.22 
  -2   9   0  259.89   14.98 
  -2   9   0  299.86   13.67 
  -2   9   0  282.49   15.65 
   1  -9   0  534.01   24.28 
   1  -9   0  577.68   27.06 
   1  -9   0  538.62   24.95 
  -1   9   0  528.70   24.68 
  -1   9   0  555.26   26.63 
  -1   9   0  547.51   26.11 
   0  -9   0  632.68   30.24 
   0  -9   0  621.87   28.21 
   0  -9   0  600.93   27.50 
   0   9   0  645.81   29.41 
   0   9   0  660.80   28.06 
   0   9   0  594.85   29.74 
  -1  -9   0  453.51   23.22 
  -1  -9   0  444.33   21.07 
  -1  -9   0  463.47   20.33 
   1   9   0  473.47   22.86 
   1   9   0  475.06   22.19 
   1   9   0  454.70   20.96 
  -2  -9   0 1847.62   79.54 
  -2  -9   0 1795.62   76.45 
  -2  -9   0 1761.83   77.26 
   2   9   0 1814.39   77.27 
   2   9   0 1663.70   78.74 
   2   9   0 1757.51   78.34 
  -3  -9   0  587.02   29.42 
  -3  -9   0  608.24   27.11 
   3   9   0  638.32   27.29 
   3   9   0  579.76   28.22 
  -4  -9   0  515.52   25.46 
  -4  -9   0  490.31   22.84 
   4   9   0  528.37   23.18 
   4   9   0  487.37   24.04 
  -5  -9   0  776.76   38.10 
   5   9   0  808.37   37.07 
   5   9   0  833.33   36.14 
  -6  -9   0  634.15   31.56 
   6   9   0  677.97   29.59 
   6   9   0  630.52   30.44 
  -7  -9   0  237.36   14.83 
   7   9   0  239.73   12.63 
   7   9   0  250.92   13.66 
  -8  -9   0  504.11   25.13 
   8   9   0  463.04   23.77 
   8   9   0  461.53   22.75 
  -9  -9   0   44.89    8.87 
   9   9   0   48.33    6.57 
   9   9   0   40.00    5.89 
   6 -10   0   62.95    6.17 
   6 -10   0   72.70    7.04 
  -6  10   0   73.42    7.43 
  -6  10   0   63.55    6.44 
  -6  10   0   61.93    8.87 
   5 -10   0   79.06    6.83 
   5 -10   0   69.41    5.99 
  -5  10   0   66.98    8.63 
  -5  10   0   78.05    5.63 
  -5  10   0   73.31    8.45 
   4 -10   0  163.17    9.85 
   4 -10   0  170.87    9.19 
  -4  10   0  176.71   10.85 
  -4  10   0  151.68    9.01 
  -4  10   0  179.71   12.19 
   3 -10   0  415.01   19.98 
   3 -10   0  422.79   19.30 
  -3  10   0  401.29   19.57 
  -3  10   0  435.88   22.14 
  -3  10   0  409.62   20.97 
   2 -10   0  286.84   13.89 
   2 -10   0  296.09   14.75 
  -2  10   0  299.58   16.14 
  -2  10   0  290.66   14.14 
  -2  10   0  307.48   16.80 
   1 -10   0  709.91   32.03 
   1 -10   0  700.36   32.76 
  -1  10   0  785.13   34.95 
  -1  10   0  707.94   34.00 
  -1  10   0  721.50   32.43 
   0 -10   0  430.61   19.50 
   0 -10   0  410.48   18.53 
   0 -10   0  425.18   21.83 
   0  10   0  401.04   19.08 
   0  10   0  406.94   20.38 
   0  10   0  402.53   21.21 
  -1 -10   0 1347.57   57.44 
  -1 -10   0 1330.37   56.54 
  -1 -10   0 1253.17   59.59 
   1  10   0 1322.38   59.26 
   1  10   0 1294.02   57.17 
   1  10   0 1269.18   58.45 
  -2 -10   0  107.04    9.13 
  -2 -10   0   98.17    6.08 
   2  10   0   90.37    7.00 
   2  10   0   86.73    5.93 
  -3 -10   0 1149.98   48.92 
  -3 -10   0 1026.89   45.98 
   3  10   0  987.65   47.15 
   3  10   0  993.20   45.93 
  -4 -10   0  446.90   20.52 
  -4 -10   0  437.94   23.36 
   4  10   0  444.77   20.64 
   4  10   0  443.55   21.86 
  -5 -10   0  134.31   11.01 
   5  10   0  156.60    8.37 
   5  10   0  135.84    9.97 
  -6 -10   0  242.69   15.00 
   6  10   0  217.19   13.68 
   6  10   0  242.58   12.26 
  -7 -10   0  177.36   12.98 
   7  10   0  183.56   10.38 
   7  10   0  189.08   12.23 
  -8 -10   0  144.29   11.92 
   8  10   0  145.80   11.28 
   8  10   0  149.16    9.25 
   5 -11   0  236.66   12.53 
   5 -11   0  251.30   12.92 
  -5  11   0  229.48   12.83 
  -5  11   0  235.94   15.74 
  -5  11   0  238.99   15.26 
   4 -11   0  379.10   18.38 
   4 -11   0  403.88   18.94 
  -4  11   0  388.71   20.38 
  -4  11   0  390.06   21.59 
  -4  11   0  372.06   18.72 
   3 -11   0  479.23   21.99 
   3 -11   0  475.01   22.79 
  -3  11   0  484.29   24.35 
  -3  11   0  467.65   25.32 
  -3  11   0  479.54   22.34 
   2 -11   0  246.96   13.39 
  -2  11   0  250.53   12.62 
  -2  11   0  249.86   14.94 
  -2  11   0  274.32   15.89 
   1 -11   0  481.65   22.35 
   1 -11   0  480.44   21.62 
  -1  11   0  484.75   22.11 
  -1  11   0  488.30   24.01 
  -1  11   0  450.49   24.48 
   0 -11   0  904.02   39.54 
   0 -11   0  889.51   38.62 
   0  11   0  822.02   41.40 
   0  11   0  933.00   40.98 
   0  11   0  849.71   39.11 
  -1 -11   0  491.87   26.12 
  -1 -11   0  498.73   23.43 
   1  11   0  497.03   23.14 
   1  11   0  533.80   25.02 
  -2 -11   0  154.28    8.53 
  -2 -11   0  140.86   11.41 
   2  11   0  145.51    8.28 
   2  11   0  155.31   10.43 
  -3 -11   0  323.78   18.53 
  -3 -11   0  311.96   15.32 
   3  11   0  318.30   15.28 
   3  11   0  309.94   16.63 
  -4 -11   0  197.53   11.33 
  -4 -11   0  155.21   12.12 
   4  11   0  143.04   10.03 
   4  11   0  151.59    8.86 
  -5 -11   0  334.64   19.31 
   5  11   0  343.84   16.13 
   5  11   0  301.93   17.73 
  -6 -11   0  145.01   12.20 
   6  11   0  158.89   10.27 
   6  11   0  142.75    8.81 
  -7 -11   0   40.60    8.57 
   7  11   0   29.79    6.26 
   7  11   0   29.90    4.33 
  -8 -11   0  119.75   11.63 
   8  11   0  118.21   10.66 
   8  11   0  119.03    8.38 
   4 -12   0  372.18   18.02 
   4 -12   0  363.39   17.42 
  -4  12   0  363.19   20.19 
  -4  12   0  347.33   17.76 
  -4  12   0  347.04   20.92 
   3 -12   0  394.37   18.65 
   3 -12   0  409.39   19.77 
  -3  12   0  404.31   22.38 
  -3  12   0  367.65   18.97 
  -3  12   0  401.45   21.37 
   2 -12   0 1014.28   45.29 
  -2  12   0  911.33   47.37 
  -2  12   0  983.13   44.72 
  -2  12   0 1117.35   47.14 
   1 -12   0   57.20    6.20 
  -1  12   0   59.26    5.32 
  -1  12   0   63.73    7.97 
   0 -12   0  274.63   14.37 
   0  12   0  285.07   13.91 
   0  12   0  276.08   15.44 
  -1 -12   0  161.60    9.08 
   1  12   0  141.28   10.66 
   1  12   0  141.27    8.43 
  -2 -12   0   97.68    6.90 
   2  12   0  101.87    6.59 
   2  12   0   98.37    9.04 
  -3 -12   0  132.43   11.76 
   3  12   0  119.26    7.72 
   3  12   0  142.24   10.36 
  -4 -12   0  372.38   21.51 
   4  12   0  371.21   19.50 
   4  12   0  370.38   17.86 
  -5 -12   0   62.71    9.66 
   5  12   0   62.41    5.74 
   5  12   0   67.87    8.54 
  -6 -12   0  337.97   20.24 
   6  12   0  293.63   15.56 
   6  12   0  302.23   17.24 
   7  12   0  349.48   19.86 
   2 -13   0   46.20    6.50 
  -2  13   0   48.37    5.59 
  -2  13   0   48.92    8.37 
   1 -13   0  377.95   18.76 
  -1  13   0  382.97   18.08 
  -1  13   0  349.00   19.70 
   0 -13   0  101.31    7.88 
   0  13   0  100.74    7.03 
   0  13   0  104.91    9.80 
  -1 -13   0   59.29    6.09 
   1  13   0   69.55    8.47 
   1  13   0   58.63    5.96 
  -2 -13   0  367.71   18.40 
   2  13   0  371.97   17.94 
   2  13   0  381.32   20.31 
   3  13   0  180.81   10.28 
   3  13   0  196.44   12.17 
  -4 -13   0  160.78   18.38 
   4  13   0  196.83   10.41 
   4  13   0  185.84   12.94 
  -5 -13   0  257.25   17.91 
   5  13   0  267.15   16.29 
   5  13   0  260.16   14.52 
  -1 -14   0  337.48   17.19 
   1  14   0  342.57   19.20 
   1  14   0  317.60   16.40 
  -2 -14   0   94.00    7.33 
   2  14   0   70.42    6.42 
   2  14   0   80.28    9.44 
   5  13  -1  379.22   21.29 
   5  13  -1  417.90   19.86 
  -5 -13   1  404.10   23.94 
   4  13  -1  261.10   13.88 
   4  13  -1  269.26   15.51 
   3  13  -1  138.30    8.76 
   3  13  -1  137.57   11.21 
   2  13  -1  111.11    7.50 
   2  13  -1  105.87    9.89 
  -2 -13   1  106.52    7.73 
   1  13  -1  264.13   13.15 
   1  13  -1  238.70   15.20 
  -1 -13   1  244.03   13.60 
   0  13  -1   10.30    3.53 
   0  13  -1   29.15    6.08 
   0 -13   1   22.25    4.19 
  -1  13  -1  375.59   19.23 
  -1  13  -1  308.60   17.13 
   1 -13   1  375.15   17.93 
  -2  13  -1  236.55   12.80 
  -2  13  -1  251.92   15.39 
   2 -13   1  230.51   12.82 
   6  12  -1  245.78   15.50 
   6  12  -1  234.98   13.22 
  -6 -12   1  252.97   17.33 
   5  12  -1  121.48    8.19 
   5  12  -1  122.63    9.47 
  -5 -12   1  122.14   12.01 
   4  12  -1  185.31   11.97 
   4  12  -1  194.43   10.75 
  -4 -12   1  193.16   14.44 
   3  12  -1  118.16    9.79 
   3  12  -1  112.87    7.52 
  -3 -12   1  114.22   11.40 
   2  12  -1   99.60    7.04 
   2  12  -1  101.81    9.33 
  -2 -12   1  116.05    7.95 
   1  12  -1  343.81   18.23 
   1  12  -1  315.76   16.12 
  -1 -12   1  338.26   16.39 
   0  12  -1  261.50   13.45 
   0  12  -1  277.33   15.04 
   0 -12   1  257.31   13.72 
  -1  12  -1   68.99    8.85 
  -1  12  -1   75.73    8.42 
  -1  12  -1   73.01    6.08 
   1 -12   1   81.99    6.70 
  -2  12  -1  247.64   13.48 
  -2  12  -1  295.18   16.05 
  -2  12  -1  263.05   16.58 
   2 -12   1  255.09   13.55 
  -3  12  -1  374.77   22.05 
  -3  12  -1  437.66   19.47 
  -3  12  -1  395.14   20.94 
   3 -12   1  396.41   19.41 
   3 -12   1  386.03   18.85 
  -4  12  -1  523.55   26.05 
  -4  12  -1  472.34   23.53 
  -4  12  -1  493.80   27.03 
   4 -12   1  492.84   23.13 
   4 -12   1  498.76   24.05 
   7  11  -1   95.49    8.05 
   7  11  -1   88.00    8.20 
  -7 -11   1  105.78   10.99 
   6  11  -1   63.14    8.31 
   6  11  -1   87.19    6.64 
  -6 -11   1   69.87    9.65 
   5  11  -1  208.29   12.99 
   5  11  -1  228.65   12.28 
  -5 -11   1  231.45   15.34 
   4  11  -1   81.62    7.18 
   4  11  -1   75.73    6.08 
  -4 -11   1   78.07    9.52 
   3  11  -1  414.48   19.02 
   3  11  -1  385.52   20.17 
  -3 -11   1  404.20   18.72 
  -3 -11   1  385.85   21.92 
   2  11  -1  480.47   23.81 
   2  11  -1  471.23   22.49 
  -2 -11   1  500.51   25.63 
   1  11  -1  325.70   15.62 
   1  11  -1  316.24   17.32 
  -1 -11   1  321.77   15.67 
   0  11  -1  906.02   44.40 
   0  11  -1  983.78   43.87 
   0  11  -1  978.14   42.24 
   0 -11   1  957.91   42.37 
   0 -11   1  912.28   41.48 
  -1  11  -1  735.14   33.24 
  -1  11  -1  751.02   34.97 
  -1  11  -1  742.54   35.43 
   1 -11   1  731.05   33.44 
   1 -11   1  719.45   32.60 
  -2  11  -1  799.49   33.49 
  -2  11  -1  736.24   35.88 
  -2  11  -1  743.67   35.18 
   2 -11   1  661.42   32.72 
   2 -11   1  755.13   33.69 
  -3  11  -1  275.53   16.30 
  -3  11  -1  318.39   17.45 
  -3  11  -1  292.85   14.49 
   3 -11   1  290.51   13.95 
   3 -11   1  255.57   14.31 
  -4  11  -1  326.70   19.13 
  -4  11  -1  313.83   16.38 
  -4  11  -1  330.55   17.99 
   4 -11   1  332.77   15.99 
   4 -11   1  345.56   16.92 
  -5  11  -1  104.95    7.91 
  -5  11  -1  100.59    9.98 
  -5  11  -1  108.49   11.43 
   5 -11   1  120.84    8.49 
   5 -11   1   97.87    7.32 
   8  10  -1  178.02   11.27 
   8  10  -1  196.61   12.38 
  -8 -10   1  207.17   14.99 
   7  10  -1  138.77    9.41 
   7  10  -1  161.47   11.33 
  -7 -10   1  169.18   13.14 
   6  10  -1  381.23   18.54 
   6  10  -1  375.98   19.49 
  -6 -10   1  383.42   21.18 
   5  10  -1  137.83   10.21 
   5  10  -1  150.64    8.78 
  -5 -10   1  157.15   11.64 
   4  10  -1  227.91   13.18 
   4  10  -1  254.53   12.38 
  -4 -10   1  234.41   14.97 
   3  10  -1 1757.32   75.45 
   3  10  -1 1769.39   76.66 
  -3 -10   1 1618.41   77.71 
  -3 -10   1 1742.61   75.14 
   2  10  -1  562.77   25.73 
   2  10  -1  533.11   26.98 
  -2 -10   1  591.68   28.50 
   1  10  -1 1122.08   50.07 
   1  10  -1 1124.58   50.65 
   1  10  -1 1069.64   48.58 
  -1 -10   1 1065.79   48.62 
  -1 -10   1 1105.85   47.87 
  -1 -10   1 1118.71   51.17 
   0  10  -1  894.28   40.38 
   0  10  -1  879.89   40.96 
   0  10  -1  883.96   39.09 
   0 -10   1  865.45   39.16 
   0 -10   1  894.37   41.56 
   0 -10   1  850.16   38.41 
  -1  10  -1  521.13   26.02 
  -1  10  -1  523.86   25.42 
  -1  10  -1  528.79   23.93 
   1 -10   1  516.79   23.36 
   1 -10   1  514.36   24.06 
  -2  10  -1  809.90   38.05 
  -2  10  -1  766.96   35.83 
  -2  10  -1  806.64   37.43 
   2 -10   1  806.85   35.44 
   2 -10   1  809.71   36.12 
  -3  10  -1  560.59   28.28 
  -3  10  -1  550.68   27.38 
  -3  10  -1  619.25   26.24 
   3 -10   1  562.99   26.32 
   3 -10   1  547.41   25.66 
  -4  10  -1  133.23    7.50 
  -4  10  -1  114.92    8.86 
  -4  10  -1  115.53   10.14 
   4 -10   1  129.32    7.53 
   4 -10   1  137.96    8.37 
  -5  10  -1  521.90   26.34 
  -5  10  -1  548.95   27.04 
  -5  10  -1  471.30   24.24 
   5 -10   1  561.84   24.91 
   5 -10   1  513.99   24.06 
  -6  10  -1  278.95   17.40 
  -6  10  -1  260.43   16.40 
  -6  10  -1  275.19   14.18 
   6 -10   1  280.38   14.28 
   6 -10   1  290.13   14.88 
   9   9  -1   23.76    4.87 
   9   9  -1   33.82    6.61 
  -9  -9   1   26.34    6.77 
   8   9  -1  240.90   14.67 
   8   9  -1  217.53   12.98 
  -8  -9   1  257.47   15.77 
   7   9  -1   94.19    7.10 
   7   9  -1   90.24    8.55 
  -7  -9   1   94.99    9.54 
   6   9  -1  700.17   33.58 
   6   9  -1  685.14   32.49 
  -6  -9   1  752.42   34.93 
   5   9  -1  766.39   34.27 
   5   9  -1  746.25   35.24 
  -5  -9   1  760.48   36.44 
   4   9  -1  771.79   33.80 
   4   9  -1  724.65   34.72 
  -4  -9   1  788.64   36.05 
  -4  -9   1  716.83   33.23 
   3   9  -1 1225.35   54.07 
   3   9  -1 1233.08   55.09 
  -3  -9   1 1186.66   53.74 
  -3  -9   1 1268.62   56.34 
   2   9  -1  676.33   31.74 
   2   9  -1  718.03   30.23 
   2   9  -1  671.51   31.14 
  -2  -9   1  629.84   29.81 
  -2  -9   1  655.12   32.27 
   1   9  -1  825.72   37.62 
   1   9  -1  797.54   36.40 
   1   9  -1  854.87   38.19 
  -1  -9   1  797.67   38.50 
  -1  -9   1  817.31   36.35 
  -1  -9   1  817.33   35.68 
   0   9  -1  683.84   30.71 
   0   9  -1  690.42   31.38 
   0   9  -1  667.47   29.55 
   0  -9   1  643.49   28.93 
   0  -9   1  633.42   29.53 
   0  -9   1  632.60   31.52 
  -1   9  -1  972.15   42.05 
  -1   9  -1  914.54   41.30 
   1  -9   1  924.10   40.18 
   1  -9   1  859.66   42.00 
   1  -9   1  854.99   39.59 
  -2   9  -1  166.13   10.38 
  -2   9  -1  183.09    9.52 
  -2   9  -1  196.72   11.53 
   2  -9   1  173.04    9.05 
   2  -9   1  184.91    9.71 
  -3   9  -1  495.79   23.41 
  -3   9  -1  413.45   22.50 
  -3   9  -1  458.68   21.20 
   3  -9   1  468.61   21.52 
   3  -9   1  457.33   20.97 
  -4   9  -1  495.24   23.16 
  -4   9  -1  480.10   24.99 
  -4   9  -1  499.11   24.69 
   4  -9   1  519.87   23.39 
   4  -9   1  507.92   22.92 
  -5   9  -1  283.90   14.00 
  -5   9  -1  310.25   16.08 
  -5   9  -1  265.31   16.05 
   5  -9   1  289.04   14.43 
   5  -9   1  272.12   13.91 
  -6   9  -1  199.85   10.28 
  -6   9  -1  185.45   13.17 
  -6   9  -1  165.84   11.39 
   6  -9   1  192.87   10.79 
   6  -9   1  185.49   10.36 
  -7   9  -1  478.94   23.38 
  -7   9  -1  395.53   21.07 
  -7   9  -1  416.08   23.11 
   7  -9   1  464.92   21.48 
   7  -9   1  445.39   21.11 
   9   8  -1  555.24   26.08 
   9   8  -1  550.26   26.97 
  -9  -8   1  528.80   27.97 
   8   8  -1  340.31   17.12 
   8   8  -1  330.72   17.82 
  -8  -8   1  345.73   19.48 
   7   8  -1  655.26   32.39 
   7   8  -1  688.08   31.52 
  -7  -8   1  712.07   33.53 
   6   8  -1  904.88   41.35 
   6   8  -1  887.77   40.44 
  -6  -8   1  910.59   42.49 
   5   8  -1  971.44   45.49 
   5   8  -1 1025.12   44.77 
  -5  -8   1 1019.79   46.72 
   4   8  -1 1236.03   54.50 
   4   8  -1 1249.15   55.23 
  -4  -8   1 1263.45   53.96 
  -4  -8   1 1200.96   56.22 
   3   8  -1  595.02   26.81 
   3   8  -1  526.51   27.07 
   3   8  -1  523.15   24.72 
   3   8  -1  575.76   25.78 
  -3  -8   1  589.76   25.42 
  -3  -8   1  630.69   27.90 
   2   8  -1  298.79   15.77 
   2   8  -1  339.36   16.62 
   2   8  -1  301.96   14.12 
   2   8  -1  325.15   15.00 
  -2  -8   1  344.72   17.17 
  -2  -8   1  315.73   14.74 
   1   8  -1  303.05   14.28 
   1   8  -1  276.72   12.58 
   1   8  -1  253.29   14.37 
   1   8  -1  290.59   13.36 
  -1  -8   1  286.31   15.22 
  -1  -8   1  278.94   13.14 
   0   8  -1  187.25   11.30 
   0   8  -1  206.05    9.93 
   0   8  -1  197.14   11.10 
   0  -8   1  214.67   11.89 
   0  -8   1  192.15    9.84 
  -1   8  -1  191.40   10.35 
  -1   8  -1  186.93    9.42 
  -1   8  -1  187.47   10.98 
   1  -8   1  179.53    9.44 
   1  -8   1  189.05   11.18 
  -2   8  -1  603.42   28.00 
  -2   8  -1  581.37   27.55 
  -2   8  -1  594.26   26.38 
   2  -8   1  576.92   26.06 
   2  -8   1  612.81   28.27 
   2  -8   1  548.47   26.35 
  -3   8  -1   27.06    4.11 
  -3   8  -1   31.60    3.81 
  -3   8  -1   29.81    5.35 
   3  -8   1   38.20    4.13 
   3  -8   1   35.01    3.36 
  -4   8  -1 1683.83   72.81 
  -4   8  -1 1587.98   71.12 
  -4   8  -1 1654.46   72.40 
   4  -8   1 1579.56   71.17 
   4  -8   1 1623.17   70.90 
  -5   8  -1  388.92   19.10 
  -5   8  -1  348.67   18.26 
  -5   8  -1  344.30   17.05 
   5  -8   1  360.47   17.38 
   5  -8   1  355.58   17.02 
  -6   8  -1  461.85   21.05 
  -6   8  -1  436.28   22.07 
  -6   8  -1  437.54   22.62 
   6  -8   1  442.69   21.04 
   6  -8   1  434.16   20.76 
  -7   8  -1  562.58   28.22 
  -7   8  -1  585.77   26.45 
  -7   8  -1  557.86   27.94 
   7  -8   1  565.13   26.43 
   7  -8   1  551.32   26.20 
  -8   8  -1  287.66   15.09 
  -8   8  -1  294.54   16.95 
  -8   8  -1  293.85   16.80 
   8  -8   1  276.14   14.54 
   8  -8   1  277.53   14.87 
  10   7  -1  285.23   15.37 
  10   7  -1  288.02   16.75 
 -10  -7   1  274.72   17.35 
   9   7  -1  258.15   13.98 
   9   7  -1  264.03   15.26 
  -9  -7   1  250.51   15.87 
   8   7  -1  696.73   31.32 
   8   7  -1  688.87   32.27 
  -8  -7   1  649.12   32.74 
   7   7  -1  985.69   45.98 
   7   7  -1 1000.52   46.80 
  -7  -7   1 1096.90   47.84 
   6   7  -1  294.74   15.96 
   6   7  -1  307.21   15.22 
  -6  -7   1  326.27   16.95 
   5   7  -1  709.73   31.25 
   5   7  -1  661.06   30.44 
  -5  -7   1  623.47   29.41 
  -5  -7   1  714.37   32.14 
   4   7  -1  302.81   14.48 
   4   7  -1  282.28   13.33 
   4   7  -1  276.12   12.28 
   4   7  -1  241.08   12.01 
   4   7  -1  259.55   13.70 
  -4  -7   1  283.21   12.16 
  -4  -7   1  286.28   14.99 
  -4  -7   1  274.91   12.57 
  -4  -7   1  288.30   16.00 
   3   7  -1  491.97   22.65 
   3   7  -1  488.12   21.68 
   3   7  -1  535.12   23.86 
   3   7  -1  519.56   23.39 
  -3  -7   1  525.55   21.84 
  -3  -7   1  453.04   23.96 
  -3  -7   1  468.13   23.89 
  -3  -7   1  513.85   22.20 
   2   7  -1  740.12   32.38 
   2   7  -1  764.17   33.19 
   2   7  -1  741.13   33.88 
   2   7  -1  740.71   34.29 
  -2  -7   1  762.97   34.66 
  -2  -7   1  757.41   32.56 
  -2  -7   1  723.81   32.83 
   1   7  -1  557.19   26.21 
   1   7  -1  574.37   25.04 
   1   7  -1  538.11   24.36 
   1   7  -1  547.86   25.81 
  -1  -7   1  549.26   24.79 
  -1  -7   1  582.92   26.63 
   0   7  -1   93.34    6.40 
   0   7  -1   95.40    6.69 
   0   7  -1   87.27    5.24 
   0   7  -1   92.08    4.68 
   0  -7   1   88.81    4.94 
   0  -7   1   90.10    6.35 
  -1   7  -1  941.70   42.93 
  -1   7  -1  999.35   44.27 
  -1   7  -1  965.27   43.84 
  -1   7  -1  947.58   42.60 
   1  -7   1 1010.20   43.01 
   1  -7   1 1003.14   44.44 
  -2   7  -1  322.59   16.15 
  -2   7  -1  333.71   16.50 
  -2   7  -1  316.67   16.56 
  -2   7  -1  304.37   15.13 
   2  -7   1  328.31   14.85 
   2  -7   1  318.56   15.22 
   2  -7   1  356.33   16.71 
  -3   7  -1  319.00   17.57 
  -3   7  -1  348.45   16.67 
  -3   7  -1  361.83   17.18 
  -3   7  -1  327.31   15.56 
   3  -7   1  335.25   15.33 
   3  -7   1  318.59   16.78 
   3  -7   1  322.45   15.51 
  -4   7  -1  883.81   40.95 
  -4   7  -1  886.04   39.91 
  -4   7  -1  919.85   41.31 
   4  -7   1  894.22   40.05 
   4  -7   1  922.06   39.82 
  -5   7  -1  164.08    8.47 
  -5   7  -1  151.76    9.57 
  -5   7  -1  143.89    9.57 
   5  -7   1  137.56    7.76 
   5  -7   1  152.54    8.10 
  -6   7  -1  804.71   36.05 
  -6   7  -1  744.57   36.11 
  -6   7  -1  782.62   34.68 
   6  -7   1  766.38   34.75 
   6  -7   1  759.75   34.57 
  -7   7  -1  214.37   13.04 
  -7   7  -1  219.98   11.34 
  -7   7  -1  211.52   13.28 
   7  -7   1  220.09   11.58 
   7  -7   1  223.59   11.70 
  -8   7  -1  313.19   16.37 
  -8   7  -1  320.51   17.94 
  -8   7  -1  324.80   17.96 
   8  -7   1  327.45   15.96 
   8  -7   1  331.36   16.28 
  -9   7  -1  224.23   12.62 
  -9   7  -1  222.63   14.63 
  -9   7  -1  240.55   15.00 
   9  -7   1  247.72   13.00 
   9  -7   1  250.04   13.12 
  10   6  -1  219.42   12.79 
  10   6  -1  216.16   13.26 
 -10  -6   1  224.69   14.41 
   9   6  -1  405.78   20.31 
   9   6  -1  389.41   20.83 
  -9  -6   1  441.10   22.02 
   8   6  -1  231.46   13.91 
   8   6  -1  248.87   13.12 
  -8  -6   1  260.91   14.73 
   7   6  -1  262.69   14.51 
   7   6  -1  265.71   13.78 
  -7  -6   1  286.33   15.11 
   6   6  -1  710.47   31.97 
   6   6  -1  695.87   30.93 
   6   6  -1  670.47   32.50 
  -6  -6   1  751.97   33.32 
   5   6  -1  226.59   11.31 
   5   6  -1  201.05   11.03 
   5   6  -1  227.51    9.64 
   5   6  -1  206.72   10.73 
  -5  -6   1  192.16   11.89 
   4   6  -1  371.24   17.22 
   4   6  -1  394.00   18.77 
   4   6  -1  388.05   18.86 
   4   6  -1  373.18   18.09 
   4   6  -1  432.06   17.27 
  -4  -6   1  413.40   19.39 
  -4  -6   1  389.23   17.24 
   3   6  -1  129.79    7.86 
   3   6  -1  134.71    7.10 
   3   6  -1  130.25    6.22 
   3   6  -1  140.69    6.10 
   3   6  -1  135.81    7.70 
  -3  -6   1  120.17    7.99 
  -3  -6   1  140.14    6.19 
  -3  -6   1  128.26    6.44 
  -3  -6   1  151.65    8.62 
   2   6  -1  355.91   17.55 
   2   6  -1  372.33   17.07 
   2   6  -1  396.85   16.36 
   2   6  -1  389.75   18.09 
  -2  -6   1  369.23   16.67 
  -2  -6   1  325.27   18.08 
  -2  -6   1  361.15   18.11 
  -2  -6   1  411.49   16.55 
   1   6  -1  330.75   14.24 
   1   6  -1  293.42   15.57 
   1   6  -1  327.51   15.53 
   1   6  -1  323.34   14.83 
  -1  -6   1  328.92   16.08 
  -1  -6   1  331.37   14.32 
   0   6  -1 1865.23   80.13 
   0   6  -1 1808.03   78.69 
   0   6  -1 1824.54   79.74 
   0   6  -1 1853.41   79.08 
   0  -6   1 1846.21   78.99 
   0  -6   1 1742.63   80.19 
  -1   6  -1 2111.10   90.07 
  -1   6  -1 2132.37   91.14 
  -1   6  -1 2100.28   89.78 
  -1   6  -1 1964.63   90.68 
   1  -6   1 2084.00   90.05 
  -2   6  -1 1097.41   45.88 
  -2   6  -1 1097.56   46.96 
  -2   6  -1 1027.65   46.52 
  -2   6  -1 1070.80   47.08 
   2  -6   1  984.10   46.84 
   2  -6   1 1005.19   45.82 
  -3   6  -1 1696.27   71.04 
  -3   6  -1 1645.03   71.77 
  -3   6  -1 1714.23   72.33 
  -3   6  -1 1652.60   72.03 
   3  -6   1 1531.00   70.98 
   3  -6   1 1612.54   71.96 
   3  -6   1 1571.35   70.80 
  -4   6  -1  262.66   13.86 
  -4   6  -1  278.01   12.82 
  -4   6  -1  282.81   14.08 
  -4   6  -1  259.57   13.39 
   4  -6   1  267.76   12.84 
   4  -6   1  250.89   13.52 
   4  -6   1  269.75   12.62 
  -5   6  -1  938.47   42.15 
  -5   6  -1  949.96   41.36 
  -5   6  -1  970.45   42.51 
   5  -6   1  895.41   41.10 
   5  -6   1  908.05   41.31 
  -6   6  -1   74.88    5.94 
  -6   6  -1   72.97    6.45 
  -6   6  -1   74.35    5.02 
   6  -6   1   70.86    5.37 
   6  -6   1   76.46    5.54 
  -7   6  -1  384.15   20.72 
  -7   6  -1  422.19   19.49 
  -7   6  -1  433.43   20.93 
   7  -6   1  410.96   19.34 
   7  -6   1  414.04   19.57 
  -8   6  -1   74.72    8.08 
  -8   6  -1   83.80    6.80 
  -8   6  -1   86.45    7.95 
   8  -6   1   96.65    6.62 
   8  -6   1   77.04    6.62 
  -9   6  -1   96.46    9.15 
  -9   6  -1   97.60    9.19 
  -9   6  -1  104.15    6.94 
   9  -6   1   85.48    7.49 
   9  -6   1   92.09    7.11 
  10   5  -1  190.41   11.21 
  10   5  -1  180.89   12.46 
 -10  -5   1  181.44   12.86 
   9   5  -1  359.92   18.60 
   9   5  -1  363.65   19.59 
  -9  -5   1  403.80   20.19 
   8   5  -1  462.89   22.19 
   8   5  -1  456.28   23.14 
   8   5  -1  458.55   21.40 
  -8  -5   1  516.32   23.88 
   7   5  -1   15.81    2.69 
   7   5  -1   16.38    3.83 
   7   5  -1   18.45    2.50 
  -7  -5   1   17.28    3.99 
   6   5  -1   19.04    3.63 
   6   5  -1   23.40    2.42 
   6   5  -1   15.83    2.95 
  -6  -5   1   24.99    5.00 
   5   5  -1  343.54   14.76 
   5   5  -1  329.09   15.89 
   5   5  -1  319.52   15.76 
   5   5  -1  339.26   15.59 
  -5  -5   1  311.34   16.53 
  -5  -5   1  340.05   16.48 
  -5  -5   1  327.69   14.61 
   4   5  -1  274.16   12.10 
   4   5  -1  290.95   12.37 
   4   5  -1  263.86   13.52 
   4   5  -1  312.41   13.84 
   4   5  -1  278.94   13.17 
  -4  -5   1  269.25   13.91 
  -4  -5   1  285.97   14.16 
  -4  -5   1  247.36   12.17 
  -4  -5   1  283.97   12.30 
   3   5  -1  773.62   33.49 
   3   5  -1  742.85   32.80 
   3   5  -1  717.35   34.04 
   3   5  -1  759.22   33.87 
   3   5  -1  862.30   32.85 
  -3  -5   1  746.44   32.93 
  -3  -5   1  692.94   34.19 
  -3  -5   1  765.91   32.85 
   2   5  -1 1309.31   56.71 
   2   5  -1 1296.96   57.28 
   2   5  -1 1313.87   56.82 
   2   5  -1 1326.15   57.64 
   2   5  -1 1333.16   58.02 
  -2  -5   1 1280.66   56.90 
  -2  -5   1 1353.28   58.19 
  -2  -5   1 1337.81   56.86 
  -2  -5   1 1290.49   58.24 
   1   5  -1 1919.01   86.62 
   1   5  -1 2114.82   85.46 
   1   5  -1 1957.69   86.32 
   1   5  -1 2078.75   85.94 
  -1  -5   1 1949.72   85.49 
  -1  -5   1 1930.57   86.71 
  -1  -5   1 1937.84   86.80 
   0   5  -1 1721.39   71.95 
   0   5  -1 1629.80   72.72 
   0   5  -1 1573.17   72.82 
   0   5  -1 1662.16   71.59 
   0   5  -1 1680.98   72.45 
   0  -5   1 1693.86   71.82 
   0  -5   1 1656.10   71.64 
  -1   5  -1  610.28   27.40 
  -1   5  -1  636.73   26.56 
  -1   5  -1  634.02   26.31 
  -1   5  -1  632.45   27.17 
  -1   5  -1  546.68   27.36 
   1  -5   1  594.40   26.48 
   1  -5   1  553.32   27.34 
  -2   5  -1 1870.92   81.86 
  -2   5  -1 1963.61   80.91 
  -2   5  -1 1870.82   81.05 
  -2   5  -1 1843.69   81.99 
  -2   5  -1 1890.66   81.62 
   2  -5   1 1797.78   81.85 
   2  -5   1 1858.60   81.03 
  -3   5  -1 1282.96   55.34 
  -3   5  -1 1153.02   55.04 
  -3   5  -1 1214.65   55.41 
  -3   5  -1 1249.96   54.52 
   3  -5   1 1244.54   54.54 
   3  -5   1 1251.78   54.39 
   3  -5   1 1351.80   55.40 
  -4   5  -1  980.85   44.60 
  -4   5  -1 1041.64   44.92 
  -4   5  -1  983.21   44.74 
  -4   5  -1 1063.54   44.02 
   4  -5   1  986.58   43.95 
   4  -5   1  978.94   44.51 
   4  -5   1  972.89   43.82 
  -5   5  -1  640.41   32.77 
  -5   5  -1  708.85   33.02 
  -5   5  -1  747.45   33.10 
  -5   5  -1  703.86   32.13 
   5  -5   1  764.19   32.09 
   5  -5   1  766.49   32.24 
  -6   5  -1  163.14    9.81 
  -6   5  -1  162.09    8.87 
  -6   5  -1  161.40    9.83 
   6  -5   1  170.38    8.84 
   6  -5   1  175.06    8.56 
  -7   5  -1   47.92    5.61 
  -7   5  -1   47.17    3.99 
  -7   5  -1   38.51    5.75 
   7  -5   1   35.97    4.50 
   7  -5   1   44.13    4.42 
  -8   5  -1  380.70   20.20 
  -8   5  -1  409.45   20.03 
  -8   5  -1  407.81   19.10 
   8  -5   1  383.14   18.82 
   8  -5   1  400.53   18.77 
  -9   5  -1  149.23    8.81 
  -9   5  -1  152.99   10.71 
  -9   5  -1  154.99   10.31 
   9  -5   1  153.92    9.38 
   9  -5   1  144.59    8.93 
 -10   5  -1   51.98    7.17 
 -10   5  -1   55.94    8.07 
  10  -5   1   61.27    7.05 
  10  -5   1   56.71    5.87 
  10  -5   1   63.05    5.63 
  10   4  -1   85.04    7.39 
  10   4  -1   75.48    7.28 
 -10  -4   1   83.32    8.29 
   9   4  -1  127.06    7.08 
   9   4  -1  124.71    9.31 
   9   4  -1  112.65    7.56 
  -9  -4   1  129.02    9.50 
   8   4  -1  136.51    9.21 
   8   4  -1  140.67    7.98 
   8   4  -1  145.17    7.24 
  -8  -4   1  132.44    9.43 
   7   4  -1  879.30   37.56 
   7   4  -1  800.90   38.67 
   7   4  -1  850.10   38.25 
  -7  -4   1  886.14   39.34 
   6   4  -1  522.15   23.58 
   6   4  -1  527.17   22.89 
   6   4  -1  520.25   24.11 
  -6  -4   1  507.29   24.45 
  -6  -4   1  506.46   24.28 
   5   4  -1 1045.12   47.57 
   5   4  -1 1021.32   48.50 
   5   4  -1 1103.25   48.33 
   5   4  -1 1064.14   48.15 
  -5  -4   1 1109.59   49.12 
  -5  -4   1 1231.68   49.08 
   4   4  -1  821.60   36.21 
   4   4  -1  804.64   36.56 
   4   4  -1  822.20   36.56 
   4   4  -1  843.30   35.71 
  -4  -4   1  806.03   35.60 
  -4  -4   1  884.42   37.17 
  -4  -4   1  767.06   36.76 
   3   4  -1  232.18   11.43 
   3   4  -1  232.77   10.86 
   3   4  -1  240.70   10.67 
   3   4  -1  234.28   11.60 
   3   4  -1  260.60   12.03 
  -3  -4   1  272.53   12.35 
  -3  -4   1  246.03   10.84 
  -3  -4   1  241.98   10.76 
  -3  -4   1  242.80   12.06 
   2   4  -1  645.31   27.97 
   2   4  -1  591.46   28.13 
   2   4  -1  660.28   28.54 
   2   4  -1  676.16   27.46 
   2   4  -1  610.77   27.44 
  -2  -4   1  614.89   27.50 
  -2  -4   1  658.26   28.76 
  -2  -4   1  632.14   27.53 
  -2  -4   1  612.78   28.54 
   1   4  -1 2287.56   94.75 
   1   4  -1 2253.66   94.43 
   1   4  -1 2111.62   95.36 
   1   4  -1 2305.20   95.04 
   1   4  -1 2044.61   95.24 
   1   4  -1 2448.88   94.36 
  -1  -4   1 2073.67   95.30 
  -1  -4   1 2232.11   94.39 
  -1  -4   1 1942.94   95.31 
  -1  -4   1 2224.81   94.47 
   0   4  -1 2634.86  112.19 
   0   4  -1 2522.78  112.93 
   0   4  -1 2458.72  113.02 
   0   4  -1 2834.55  112.10 
   0   4  -1 2528.79  112.34 
   0   4  -1 2491.46  112.69 
   0  -4   1 2552.17  112.21 
   0  -4   1 2716.01  113.05 
   0  -4   1 2811.86  113.19 
   0  -4   1 2491.90  112.09 
  -1   4  -1  797.90   37.88 
  -1   4  -1  838.66   38.48 
  -1   4  -1  940.78   38.82 
  -1   4  -1  909.83   38.10 
  -1   4  -1  881.55   38.84 
   1  -4   1  860.59   38.14 
   1  -4   1  830.75   38.01 
   1  -4   1  929.18   38.89 
  -2   4  -1  514.43   21.68 
  -2   4  -1  529.61   22.49 
  -2   4  -1  479.96   22.15 
  -2   4  -1  477.18   21.74 
  -2   4  -1  439.72   22.37 
   2  -4   1  544.22   22.54 
   2  -4   1  454.90   21.72 
  -3   4  -1  948.32   38.62 
  -3   4  -1  851.26   38.38 
  -3   4  -1  799.17   38.51 
  -3   4  -1  870.66   37.90 
   3  -4   1  843.08   37.79 
   3  -4   1  884.06   37.94 
  -4   4  -1  346.61   15.93 
  -4   4  -1  337.26   15.83 
  -4   4  -1  328.69   15.82 
  -4   4  -1  325.42   15.29 
   4  -4   1  328.68   15.18 
   4  -4   1  315.88   15.53 
   4  -4   1  353.71   15.31 
  -5   4  -1  276.02   13.44 
  -5   4  -1  278.77   13.39 
  -5   4  -1  251.31   13.28 
  -5   4  -1  273.99   12.76 
   5  -4   1  256.18   12.59 
   5  -4   1  279.02   12.70 
  -6   4  -1  742.91   32.48 
  -6   4  -1  726.90   33.11 
  -6   4  -1  722.41   33.17 
  -6   4  -1  709.62   33.18 
   6  -4   1  731.31   32.44 
   6  -4   1  738.22   32.39 
  -7   4  -1  471.12   23.28 
  -7   4  -1  498.38   22.66 
  -7   4  -1  485.97   23.71 
   7  -4   1  516.66   22.64 
   7  -4   1  502.48   22.68 
  -8   4  -1  567.88   27.07 
  -8   4  -1  566.34   26.82 
  -8   4  -1  567.15   26.22 
   8  -4   1  574.79   25.99 
   8  -4   1  570.30   25.97 
  -9   4  -1  155.43   11.19 
  -9   4  -1  167.95   10.77 
  -9   4  -1  180.89   10.10 
   9  -4   1  179.27   10.00 
   9  -4   1  186.15    9.64 
 -10   4  -1  338.73   19.97 
 -10   4  -1  379.57   19.64 
  10  -4   1  380.83   18.30 
  10  -4   1  387.11   18.41 
  10  -4   1  398.87   18.71 
  10   3  -1  389.02   20.44 
  10   3  -1  366.69   18.24 
  10   3  -1  377.55   18.98 
 -10  -3   1  421.46   20.85 
   9   3  -1  332.12   15.83 
   9   3  -1  336.46   17.34 
   9   3  -1  337.55   16.75 
  -9  -3   1  341.06   17.85 
   8   3  -1  173.83   10.30 
   8   3  -1  164.01    8.96 
   8   3  -1  179.33    8.50 
  -8  -3   1  150.52   10.24 
   7   3  -1  971.49   45.52 
   7   3  -1 1000.48   46.02 
   7   3  -1  960.23   46.63 
  -7  -3   1 1117.66   47.27 
  -7  -3   1 1153.54   47.46 
   6   3  -1  476.53   22.93 
   6   3  -1  515.19   21.20 
   6   3  -1  512.04   22.47 
   6   3  -1  439.18   21.19 
   6   3  -1  510.65   21.90 
  -6  -3   1  532.68   23.19 
  -6  -3   1  470.46   23.25 
   5   3  -1 1858.06   81.32 
   5   3  -1 1840.51   80.46 
   5   3  -1 1887.69   80.91 
  -5  -3   1 1779.60   81.41 
  -5  -3   1 1947.17   81.78 
   4   3  -1 3027.21  130.44 
   4   3  -1 3171.33  131.09 
   4   3  -1 2945.41  131.11 
   4   3  -1 2970.76  130.83 
  -4  -3   1 2969.77  130.40 
  -4  -3   1 3006.98  131.54 
  -4  -3   1 3114.51  131.39 
   3   3  -1 1564.03   69.60 
   3   3  -1 1598.72   69.41 
   3   3  -1 1724.77   69.78 
   3   3  -1 1661.89   69.06 
  -3  -3   1 1546.95   69.85 
  -3  -3   1 1514.38   68.84 
  -3  -3   1 1638.75   69.01 
  -3  -3   1 1557.21   70.02 
   2   3  -1 5552.05  250.35 
   2   3  -1 5958.59  249.49 
   2   3  -1 5725.05  250.77 
   2   3  -1 6242.02  249.66 
  -2  -3   1 5579.55  252.71 
  -2  -3   1 6237.95  253.25 
  -2  -3   1 5677.95  249.98 
  -2  -3   1 5371.26  249.45 
   1   3  -1  467.98   19.36 
   1   3  -1  432.31   19.35 
   1   3  -1  407.19   20.11 
   1   3  -1  436.94   20.10 
   1   3  -1  431.70   19.79 
   1   3  -1  474.92   19.70 
  -1  -3   1  419.37   20.09 
  -1  -3   1  439.20   19.38 
  -1  -3   1  477.12   19.83 
  -1  -3   1  470.12   19.75 
  -1  -3   1  449.62   19.40 
   0   3  -1  383.98   17.04 
   0   3  -1  379.60   17.10 
   0   3  -1  385.44   17.71 
   0   3  -1  410.86   17.31 
   0   3  -1  385.85   17.51 
   0   3  -1  405.73   17.87 
   0  -3   1  374.74   17.11 
   0  -3   1  402.16   17.47 
   0  -3   1  409.62   17.85 
   0  -3   1  377.51   17.28 
   0  -3   1  416.25   17.81 
   0  -3   1  361.61   17.04 
  -1   3  -1  177.67    7.75 
  -1   3  -1  172.89    7.84 
  -1   3  -1  173.79    8.38 
  -1   3  -1  171.54    8.15 
  -1   3  -1  162.85    8.39 
  -1   3  -1  182.54    7.89 
   1  -3   1  164.67    7.84 
   1  -3   1  187.08    8.21 
   1  -3   1  181.62    8.39 
   1  -3   1  158.55    7.76 
   1  -3   1  161.10    8.35 
   1  -3   1  170.58    7.88 
  -2   3  -1 1840.77   73.01 
  -2   3  -1 1521.35   73.43 
  -2   3  -1 1739.04   73.49 
  -2   3  -1 1708.03   73.35 
  -2   3  -1 1811.99   73.08 
   2  -3   1 1712.68   73.04 
   2  -3   1 1502.51   73.34 
  -3   3  -1  129.12    6.72 
  -3   3  -1  129.77    6.78 
  -3   3  -1  134.57    6.36 
  -3   3  -1  124.77    6.77 
  -3   3  -1  133.17    6.39 
   3  -3   1  135.08    6.66 
   3  -3   1  127.03    6.35 
  -4   3  -1  249.63   12.34 
  -4   3  -1  292.52   12.87 
  -4   3  -1  270.31   12.92 
   4  -3   1  253.12   12.37 
   4  -3   1  281.63   12.35 
   4  -3   1  274.28   12.42 
  -5   3  -1  519.83   22.73 
  -5   3  -1  497.65   22.74 
  -5   3  -1  453.59   22.21 
  -5   3  -1  509.31   22.96 
   5  -3   1  510.28   22.28 
   5  -3   1  494.48   22.20 
  -6   3  -1  483.79   22.42 
  -6   3  -1  517.25   23.25 
  -6   3  -1  446.21   22.72 
  -6   3  -1  515.93   22.82 
   6  -3   1  505.06   22.37 
   6  -3   1  508.78   22.31 
  -7   3  -1  947.56   39.97 
  -7   3  -1  889.06   40.33 
  -7   3  -1  858.30   40.36 
  -7   3  -1  882.08   40.75 
   7  -3   1  920.28   39.88 
   7  -3   1  906.33   39.76 
  -8   3  -1  588.98   26.86 
  -8   3  -1  591.52   26.42 
  -8   3  -1  533.56   27.03 
   8  -3   1  574.68   26.15 
   8  -3   1  588.26   26.17 
  -9   3  -1  823.10   39.52 
  -9   3  -1  865.62   40.02 
   9  -3   1  883.71   38.74 
   9  -3   1  909.54   39.13 
   9  -3   1  860.69   38.92 
 -10   3  -1  752.52   34.44 
 -10   3  -1  735.14   34.86 
  10  -3   1  729.48   33.62 
  10  -3   1  755.01   33.92 
  10  -3   1  706.94   33.20 
  11   2  -1  127.87    9.62 
  11   2  -1  129.35    9.38 
  11   2  -1  123.72    9.16 
 -11  -2   1  130.31   10.61 
  10   2  -1  319.81   15.76 
  10   2  -1  311.09   15.17 
  10   2  -1  305.89   17.15 
 -10  -2   1  309.41   17.18 
   9   2  -1  385.92   18.40 
   9   2  -1  364.37   19.25 
   9   2  -1  379.99   17.76 
   8   2  -1  833.42   37.06 
   8   2  -1  833.20   38.36 
   8   2  -1  846.06   37.52 
   7   2  -1 1274.64   52.64 
   7   2  -1 1239.42   53.19 
   7   2  -1 1259.84   53.67 
  -7  -2   1 1099.46   54.22 
   6   2  -1  729.40   32.31 
   6   2  -1  761.38   31.94 
   6   2  -1  732.60   31.43 
   6   2  -1  671.70   31.47 
  -6  -2   1  738.70   32.97 
   5   2  -1 1317.91   54.85 
   5   2  -1 1297.18   55.26 
   5   2  -1 1212.00   54.88 
   5   2  -1 1302.25   55.57 
  -5  -2   1 1240.96   56.09 
   4   2  -1 1143.57   48.28 
   4   2  -1  994.27   47.62 
   4   2  -1 1126.74   47.97 
   4   2  -1 1129.27   47.61 
   4   2  -1 1078.20   48.33 
   4   2  -1 1068.32   48.55 
  -4  -2   1 1213.78   48.81 
   3   2  -1 1404.80   61.36 
   3   2  -1 1416.49   61.58 
   3   2  -1 1355.63   61.55 
   3   2  -1 1420.33   61.11 
  -3  -2   1 1448.82   61.77 
  -3  -2   1 1402.24   61.92 
  -3  -2   1 1463.39   61.11 
   2   2  -1 3519.62  153.06 
   2   2  -1 3704.92  152.56 
   2   2  -1 3335.13  153.42 
  -2  -2   1 3652.24  152.54 
  -2  -2   1 3764.54  153.18 
  -2  -2   1 3288.41  153.52 
   1   2  -1 1505.61   64.99 
   1   2  -1 1502.90   65.36 
   1   2  -1 1587.32   64.79 
   1   2  -1 1597.61   65.07 
   1   2  -1 1471.25   65.02 
   1   2  -1 1368.68   65.22 
  -1  -2   1 1549.14   64.77 
  -1  -2   1 1381.26   65.30 
  -1  -2   1 1470.34   64.81 
  -1  -2   1 1619.99   65.05 
  -1  -2   1 1579.04   65.04 
  -1  -2   1 1425.76   65.27 
   0   2  -1 3345.98  152.91 
   0   2  -1 3554.33  151.86 
   0   2  -1 3278.05  153.46 
   0   2  -1 3739.51  152.62 
   0  -2   1 3740.76  153.24 
  -1   2  -1  308.39   13.85 
  -1   2  -1  320.95   14.08 
  -1   2  -1  275.98   13.66 
  -1   2  -1  323.79   14.02 
  -1   2  -1  308.07   13.64 
  -1   2  -1  308.50   13.67 
   1  -2   1  287.13   13.65 
   1  -2   1  325.01   14.00 
   1  -2   1  324.52   14.04 
   1  -2   1  327.34   13.87 
   1  -2   1  305.74   13.65 
   1  -2   1  314.09   13.71 
  -2   2  -1 1605.67   71.49 
  -2   2  -1 1596.12   71.30 
  -2   2  -1 1655.23   71.28 
  -2   2  -1 1543.43   71.49 
  -2   2  -1 1644.22   71.31 
  -2   2  -1 1544.82   71.52 
   2  -2   1 1787.97   71.54 
   2  -2   1 1626.33   71.29 
   2  -2   1 1751.85   71.50 
   2  -2   1 1622.90   71.29 
   2  -2   1 1800.69   71.36 
  -3   2  -1 2249.29  103.06 
  -3   2  -1 2461.88  102.93 
  -3   2  -1 2393.29  102.87 
  -3   2  -1 2252.33  103.03 
   3  -2   1 2577.83  102.91 
  -4   2  -1  361.22   15.79 
  -4   2  -1  364.09   15.67 
  -4   2  -1  322.42   15.76 
  -4   2  -1  328.69   16.00 
   4  -2   1  359.53   15.56 
   4  -2   1  349.01   15.57 
  -5   2  -1 1480.24   64.92 
  -5   2  -1 1548.14   65.34 
  -5   2  -1 1415.20   64.75 
   5  -2   1 1551.89   64.71 
   5  -2   1 1458.51   64.70 
  -6   2  -1 1337.79   57.98 
  -6   2  -1 1335.01   57.82 
  -6   2  -1 1333.60   58.07 
   6  -2   1 1302.96   57.61 
   6  -2   1 1306.76   57.67 
  -7   2  -1  904.47   40.06 
  -7   2  -1  909.74   40.41 
  -7   2  -1  877.32   40.73 
  -7   2  -1  895.34   40.29 
   7  -2   1  918.45   39.99 
   7  -2   1  925.97   39.88 
  -8   2  -1  333.74   18.29 
  -8   2  -1  308.64   15.93 
  -8   2  -1  343.59   16.51 
   8  -2   1  333.20   15.86 
   8  -2   1  331.08   15.60 
   8  -2   1  325.16   15.33 
  -9   2  -1  482.47   23.74 
  -9   2  -1  517.96   24.37 
   9  -2   1  500.72   23.36 
   9  -2   1  509.41   23.05 
   9  -2   1  508.89   23.29 
 -10   2  -1  270.60   16.33 
 -10   2  -1  300.79   15.86 
  10  -2   1  290.81   14.61 
  10  -2   1  322.04   15.53 
  10  -2   1  311.37   15.06 
 -11   2  -1  156.60   10.62 
 -11   2  -1  165.91   10.80 
  11  -2   1  150.79    9.69 
  11  -2   1  151.48   10.22 
  11   1  -1  281.64   15.55 
  11   1  -1  253.06   13.83 
  11   1  -1  279.72   14.94 
  10   1  -1  541.94   24.95 
  10   1  -1  538.05   25.36 
   9   1  -1  439.51   20.50 
   9   1  -1  424.68   19.88 
  -9  -1   1  448.81   21.68 
  -9  -1   1  393.29   20.90 
   8   1  -1  223.44   11.00 
   8   1  -1  229.68   11.57 
  -8  -1   1  217.75   12.45 
  -8  -1   1  219.63   12.38 
   7   1  -1  349.37   16.09 
   7   1  -1  351.93   15.54 
   7   1  -1  343.47   16.49 
  -7  -1   1  365.07   17.28 
  -7  -1   1  359.58   17.43 
  -7  -1   1  328.78   17.24 
   6   1  -1  903.72   36.95 
   6   1  -1  883.42   37.24 
   6   1  -1  892.61   36.52 
   6   1  -1  870.41   36.60 
  -6  -1   1  737.32   37.69 
  -6  -1   1  807.52   37.87 
  -6  -1   1  788.39   37.61 
   5   1  -1  722.24   30.45 
   5   1  -1  707.59   30.66 
   5   1  -1  696.56   30.10 
  -5  -1   1  696.80   31.34 
  -5  -1   1  673.07   31.18 
  -5  -1   1  664.43   31.10 
   4   1  -1  578.82   23.90 
   4   1  -1  568.06   24.37 
   4   1  -1  550.76   24.13 
   4   1  -1  544.43   23.85 
   4   1  -1  567.86   24.34 
  -4  -1   1  495.82   24.66 
  -4  -1   1  544.81   24.90 
   3   1  -1 1767.99   77.35 
   3   1  -1 1807.42   77.30 
   3   1  -1 1787.24   77.45 
  -3  -1   1 1807.53   77.29 
   2   1  -1   49.44    2.84 
   2   1  -1   46.55    2.66 
   2   1  -1   53.58    2.94 
   2   1  -1   44.19    2.90 
   2   1  -1   48.18    2.17 
   2   1  -1   48.81    2.47 
  -2  -1   1   49.61    2.74 
  -2  -1   1   47.58    2.91 
  -2  -1   1   49.54    3.13 
  -2  -1   1   47.89    2.56 
  -2  -1   1   51.48    2.47 
   1   1  -1 4618.83  206.53 
   1   1  -1 4710.37  207.12 
   1   1  -1 5064.43  208.93 
   1   1  -1 5071.09  209.74 
   1   1  -1 4873.00  206.96 
  -1  -1   1 5013.00  206.88 
  -1  -1   1 4489.35  208.56 
  -1  -1   1 4707.90  206.65 
  -1  -1   1 4558.83  205.70 
   0   1  -1 2982.13  133.66 
   0   1  -1 3413.08  134.66 
   0  -1   1 3181.14  133.71 
   0  -1   1 2788.21  133.40 
  -1   1  -1 1310.17   58.33 
  -1   1  -1 1273.89   58.22 
   1  -1   1 1285.91   58.21 
   1  -1   1 1387.29   58.24 
   1  -1   1 1294.40   58.30 
   1  -1   1 1408.67   58.24 
   1  -1   1 1460.49   58.24 
   1  -1   1 1394.87   58.28 
  -2   1  -1 1689.84   75.18 
  -2   1  -1 1846.68   74.53 
  -2   1  -1 1711.26   74.51 
  -2   1  -1 1572.61   74.62 
  -2   1  -1 1813.38   75.77 
   2  -1   1 1600.32   74.73 
   2  -1   1 1744.27   74.66 
   2  -1   1 1755.76   74.52 
   2  -1   1 1841.49   74.54 
   2  -1   1 1720.00   74.50 
  -3   1  -1 2421.64  113.61 
  -3   1  -1 2502.28  113.60 
  -3   1  -1 2699.30  113.92 
  -3   1  -1 2780.72  115.08 
   3  -1   1 2773.28  113.92 
   3  -1   1 2656.46  113.60 
  -4   1  -1 1447.43   65.54 
  -4   1  -1 1330.57   65.16 
  -4   1  -1 1559.74   65.16 
  -4   1  -1 1507.12   65.22 
   4  -1   1 1577.05   65.18 
   4  -1   1 1616.63   65.15 
  -5   1  -1 3118.76  135.98 
  -5   1  -1 2980.84  136.29 
  -5   1  -1 3263.25  135.87 
  -5   1  -1 3036.62  135.88 
   5  -1   1 3297.84  135.78 
   5  -1   1 3196.86  135.82 
  -6   1  -1  714.52   30.80 
  -6   1  -1  684.74   30.80 
  -6   1  -1  653.03   30.90 
   6  -1   1  693.46   30.68 
   6  -1   1  734.33   30.64 
  -7   1  -1 1203.40   56.84 
  -7   1  -1 1414.56   57.57 
  -7   1  -1 1248.39   56.75 
   7  -1   1 1289.71   56.55 
   7  -1   1 1306.46   56.42 
   7  -1   1 1320.60   56.78 
  -8   1  -1  509.97   24.12 
  -8   1  -1  565.15   25.01 
   8  -1   1  517.14   23.78 
   8  -1   1  519.53   23.52 
   8  -1   1  516.09   23.91 
  -9   1  -1  201.96   10.73 
  -9   1  -1  182.60   10.88 
   9  -1   1  183.67   10.05 
   9  -1   1  190.71    9.62 
   9  -1   1  195.29   10.51 
 -10   1  -1  150.40   10.68 
 -10   1  -1  157.61   10.00 
  10  -1   1  164.86    9.17 
  10  -1   1  162.42    9.17 
 -11   1  -1   12.59    4.04 
 -11   1  -1   11.72    5.19 
  11  -1   1   12.89    3.68 
  11  -1   1    4.17    4.08 
  10   0  -1  455.89   20.92 
  10   0  -1  414.73   20.16 
 -10   0   1  411.74   21.84 
 -10   0   1  421.42   21.93 
   9   0  -1  692.88   30.87 
   9   0  -1  700.81   31.43 
  -9   0   1  684.10   32.35 
  -9   0   1  663.53   32.42 
   8   0  -1  306.35   13.96 
   8   0  -1  310.92   14.78 
   8   0  -1  318.97   14.62 
  -8   0   1  296.01   15.77 
  -8   0   1  293.38   15.75 
   7   0  -1  229.16   11.47 
   7   0  -1  221.21   11.07 
   7   0  -1  224.27   10.59 
  -7   0   1  233.43   12.22 
  -7   0   1  240.49   12.01 
   6   0  -1  644.05   27.89 
   6   0  -1  628.18   27.55 
   6   0  -1  640.64   28.06 
  -6   0   1  577.15   28.51 
  -6   0   1  649.93   28.79 
   5   0  -1  235.37   10.21 
   5   0  -1  203.17   10.24 
   5   0  -1  241.68   10.66 
   5   0  -1  235.63   10.53 
  -5   0   1  194.10   11.19 
  -5   0   1  226.42   11.29 
  -5   0   1  258.42   11.26 
   4   0  -1  485.04   21.33 
   4   0  -1  477.25   21.02 
   4   0  -1  483.79   21.21 
   4   0  -1  496.78   21.36 
  -4   0   1  455.53   21.75 
  -4   0   1  477.33   21.76 
  -4   0   1  491.95   21.05 
   3   0  -1 1264.15   55.91 
   3   0  -1 1298.03   55.68 
   3   0  -1 1362.13   55.86 
   3   0  -1 1255.84   56.08 
  -3   0   1 1277.00   56.28 
  -3   0   1 1214.95   56.17 
  -3   0   1 1365.97   55.71 
   2   0  -1 1358.90   60.19 
   2   0  -1 1339.28   60.25 
   2   0  -1 1415.29   59.94 
   2   0  -1 1328.97   59.97 
   2   0  -1 1364.58   59.81 
   2   0  -1 1449.44   60.23 
   2   0  -1 1440.50   60.00 
  -2   0   1 1453.08   59.95 
  -2   0   1 1437.41   59.83 
  -2   0   1 1298.83   60.27 
  -2   0   1 1401.36   60.19 
   1   0  -1  455.78   21.16 
   1   0  -1  494.03   21.40 
   1   0  -1  482.49   21.07 
   1   0  -1  481.84   20.98 
   1   0  -1  472.60   21.07 
  -1   0   1  480.12   20.98 
  -1   0   1  502.40   21.08 
  -1   0   1  502.72   21.07 
  -1   0   1  519.92   21.47 
  -1   0   1  460.72   21.15 
  -1   0   1  494.35   21.39 
   0   0  -1 1923.83   81.77 
   0   0  -1 1854.24   81.14 
   0   0   1 1677.42   80.73 
   0   0   1 1963.50   80.61 
   0   0   1 1943.60   80.83 
   0   0   1 1852.74   81.52 
  -1   0  -1 2193.55   93.47 
  -1   0  -1 2131.17   93.25 
   1   0   1 2176.63   93.43 
   1   0   1 2134.11   93.21 
  -2   0  -1 4538.66  204.01 
  -2   0  -1 4534.07  203.79 
  -2   0  -1 5163.92  224.26 
  -2   0  -1 4515.62  204.57 
   2   0   1 4858.87  204.16 
   2   0   1 5131.41  204.82 
   2   0   1 4639.71  216.38 
   2   0   1 4561.81  203.85 
  -3   0  -1 4317.36  197.10 
  -3   0  -1 4846.08  197.81 
  -3   0  -1 4672.15  197.22 
   3   0   1 4595.69  197.40 
   3   0   1 4498.48  196.55 
   3   0   1 4533.82  196.42 
   3   0   1 4769.09  196.71 
   3   0   1 4299.96  196.78 
  -4   0  -1 1356.92   61.66 
  -4   0  -1 1389.41   61.62 
  -4   0  -1 1455.43   61.18 
  -4   0  -1 1387.66   61.34 
   4   0   1 1439.56   61.27 
   4   0   1 1470.89   61.25 
  -5   0  -1 1192.00   52.98 
  -5   0  -1 1249.14   52.42 
  -5   0  -1 1064.31   52.44 
  -5   0  -1 1198.79   52.53 
   5   0   1 1260.68   52.45 
   5   0   1 1284.91   52.38 
  -6   0  -1  648.08   29.21 
  -6   0  -1  647.25   29.38 
  -6   0  -1  632.51   29.75 
   6   0   1  665.65   29.13 
   6   0   1  682.91   29.31 
   6   0   1  687.81   29.02 
  -7   0  -1  292.04   13.65 
  -7   0  -1  276.88   13.08 
  -7   0  -1  247.86   13.09 
   7   0   1  285.66   13.10 
   7   0   1  273.49   12.77 
   7   0   1  271.36   12.54 
  -8   0  -1   80.92    5.70 
  -8   0  -1   75.67    5.68 
  -8   0  -1   74.00    6.35 
   8   0   1   87.28    5.67 
   8   0   1   77.07    4.64 
   8   0   1   83.87    5.15 
  -9   0  -1  210.03   11.31 
  -9   0  -1  191.54   11.87 
   9   0   1  212.19   10.22 
   9   0   1  206.79   10.59 
   9   0   1  213.21   11.07 
 -10   0  -1  185.62   11.21 
 -10   0  -1  189.96   11.97 
  10   0   1  196.79   10.31 
  10   0   1  201.80   10.99 
 -11   0  -1  173.23   11.42 
 -11   0  -1  162.06   10.53 
  11   0   1  152.41    9.39 
  11   0   1  148.73    9.27 
  10  -1  -1   36.97    5.17 
  10  -1  -1   38.64    5.08 
 -10   1   1   41.04    6.28 
 -10   1   1   36.78    7.02 
   9  -1  -1  152.28    8.44 
   9  -1  -1  142.80    8.82 
  -9   1   1  140.68    9.85 
  -9   1   1  130.83    9.78 
   8  -1  -1  126.92    6.52 
   8  -1  -1  132.67    7.27 
   8  -1  -1  118.25    7.22 
  -8   1   1  126.87    8.04 
  -8   1   1  119.10    8.53 
   7  -1  -1 1408.40   60.48 
   7  -1  -1 1401.48   60.96 
   7  -1  -1 1392.36   60.78 
  -7   1   1 1408.24   61.76 
  -7   1   1 1305.07   61.61 
  -7   1   1 1424.56   61.98 
   6  -1  -1  644.16   28.37 
   6  -1  -1  642.99   28.47 
   6  -1  -1  632.37   28.08 
  -6   1   1  638.96   29.09 
  -6   1   1  659.97   29.15 
  -6   1   1  611.75   29.29 
   5  -1  -1  624.09   26.55 
   5  -1  -1  623.55   26.71 
   5  -1  -1  617.98   26.82 
  -5   1   1  515.83   27.38 
  -5   1   1  642.41   27.42 
   4  -1  -1  489.72   22.41 
   4  -1  -1  530.54   22.60 
   4  -1  -1  493.58   22.61 
  -4   1   1  527.94   23.13 
  -4   1   1  502.02   23.30 
  -4   1   1  524.72   23.14 
   3  -1  -1 1169.79   49.24 
   3  -1  -1 1160.99   49.32 
  -3   1   1 1199.35   49.27 
  -3   1   1 1154.42   49.37 
  -3   1   1 1135.49   49.73 
  -3   1   1 1010.08   49.82 
   2  -1  -1 3290.01  138.39 
   2  -1  -1 3017.27  137.58 
   2  -1  -1 3262.80  137.87 
  -2   1   1 3351.89  137.61 
  -2   1   1 3183.54  137.94 
  -2   1   1 3455.75  138.49 
  -2   1   1 2844.20  137.58 
   1  -1  -1 1564.04   68.41 
   1  -1  -1 1573.52   68.57 
   1  -1  -1 1685.24   68.74 
   1  -1  -1 1667.20   68.42 
   1  -1  -1 1537.88   68.41 
  -1   1   1 1529.02   68.39 
  -1   1   1 1544.47   68.56 
  -1   1   1 1593.78   68.42 
  -1   1   1 1541.66   68.71 
  -1   1   1 1653.71   68.42 
   0  -1  -1 1016.83   48.48 
   0  -1  -1 1206.39   48.52 
   0  -1  -1 1114.68   48.34 
   0  -1  -1 1210.62   48.29 
   0   1   1 1091.72   48.51 
   0   1   1 1048.11   48.46 
   0   1   1 1184.49   48.33 
   0   1   1 1059.22   48.32 
   0   1   1 1156.42   48.28 
  -1  -1  -1  228.01    9.62 
  -1  -1  -1  215.17    9.46 
  -1  -1  -1  222.03    9.49 
  -1  -1  -1  201.39    9.64 
  -1  -1  -1  226.52    9.66 
  -1  -1  -1  208.06    9.68 
   1   1   1  217.14    9.47 
   1   1   1  225.80    9.67 
   1   1   1  218.17    9.61 
   1   1   1  228.05    9.65 
   1   1   1  214.08    9.49 
   1   1   1  222.53    9.64 
  -2  -1  -1 2793.05  111.65 
  -2  -1  -1 2611.69  111.93 
   2   1   1 2666.38  111.36 
   2   1   1 2429.52  111.31 
   2   1   1 2453.10  111.54 
   2   1   1 2534.36  111.74 
   2   1   1 2610.96  111.63 
  -3  -1  -1  114.60    5.50 
  -3  -1  -1  112.48    5.56 
  -3  -1  -1  113.95    6.00 
   3   1   1  125.70    5.60 
   3   1   1  135.27    5.75 
   3   1   1  139.97    6.11 
   3   1   1  129.66    5.75 
   3   1   1  125.55    5.68 
  -4  -1  -1 1167.10   53.78 
  -4  -1  -1 1286.01   53.39 
   4   1   1 1167.44   53.32 
   4   1   1 1308.23   53.34 
   4   1   1 1183.86   53.35 
   4   1   1 1286.24   53.49 
  -5  -1  -1   79.73    4.88 
  -5  -1  -1   69.75    4.02 
  -5  -1  -1   74.74    4.20 
   5   1   1   76.77    4.24 
   5   1   1   81.35    3.93 
   5   1   1   76.75    3.99 
   5   1   1   83.19    4.33 
  -6  -1  -1 1055.07   45.18 
  -6  -1  -1  921.36   45.50 
   6   1   1 1046.00   44.73 
   6   1   1 1087.50   45.12 
   6   1   1 1033.40   44.85 
  -7  -1  -1  243.97   12.65 
  -7  -1  -1  261.35   12.78 
  -7  -1  -1  293.30   13.48 
   7   1   1  263.57   12.25 
   7   1   1  263.63   12.05 
   7   1   1  265.13   12.64 
  -8  -1  -1   63.69    5.14 
  -8  -1  -1   58.84    5.17 
  -8  -1  -1   67.21    5.87 
   8   1   1   73.95    4.50 
   8   1   1   69.14    4.09 
   8   1   1   60.93    5.01 
  -9  -1  -1  154.67    9.55 
  -9  -1  -1  166.62    9.70 
   9   1   1  161.53    8.21 
   9   1   1  181.32    8.75 
   9   1   1  161.28    8.88 
  10   1   1  267.73   13.29 
  10   1   1  260.38   13.77 
  11   1   1  248.68   14.27 
  11   1   1  256.94   13.71 
  11   1   1  244.84   12.84 
  10  -2  -1  222.73   11.79 
  10  -2  -1  229.96   12.71 
 -10   2   1  235.53   13.38 
 -10   2   1  214.60   13.78 
   9  -2  -1   96.48    7.16 
   9  -2  -1   93.73    6.14 
   9  -2  -1   90.63    5.98 
  -9   2   1   95.96    8.07 
  -9   2   1   98.62    8.37 
   8  -2  -1  253.07   12.18 
   8  -2  -1  244.88   12.13 
   8  -2  -1  245.95   11.64 
  -8   2   1  238.94   13.23 
  -8   2   1  224.83   13.27 
   7  -2  -1  165.58    9.06 
   7  -2  -1  175.35    8.48 
   7  -2  -1  170.95    8.92 
  -7   2   1  175.52    9.99 
  -7   2   1  162.10    9.53 
   6  -2  -1  807.54   36.01 
   6  -2  -1  804.26   36.35 
   6  -2  -1  817.04   36.23 
  -6   2   1  830.50   37.04 
  -6   2   1  775.00   36.90 
  -6   2   1  882.91   37.42 
   5  -2  -1 1575.78   66.67 
   5  -2  -1 1578.69   66.79 
  -5   2   1 1522.82   67.66 
  -5   2   1 1434.84   67.38 
  -5   2   1 1488.11   66.83 
  -5   2   1 1617.77   67.52 
   4  -2  -1 1426.29   61.95 
   4  -2  -1 1470.29   62.04 
  -4   2   1 1462.68   62.62 
  -4   2   1 1407.31   62.54 
  -4   2   1 1375.85   62.05 
  -4   2   1 1434.36   62.82 
   3  -2  -1 1610.00   70.20 
   3  -2  -1 1608.95   70.17 
  -3   2   1 1764.68   70.80 
  -3   2   1 1563.49   70.57 
  -3   2   1 1569.02   70.21 
   2  -2  -1 1349.81   58.86 
   2  -2  -1 1306.21   59.38 
   2  -2  -1 1296.22   58.83 
   2  -2  -1 1373.64   58.87 
   2  -2  -1 1383.51   59.48 
   2  -2  -1 1459.22   59.63 
  -2   2   1 1240.60   58.82 
  -2   2   1 1352.35   58.88 
  -2   2   1 1394.90   59.19 
  -2   2   1 1479.44   59.39 
  -2   2   1 1391.64   59.02 
  -2   2   1 1319.85   59.41 
   1  -2  -1  176.48    8.46 
   1  -2  -1  176.76    8.06 
   1  -2  -1  177.80    8.01 
   1  -2  -1  182.83    8.01 
   1  -2  -1  183.54    8.30 
  -1   2   1  177.46    8.57 
  -1   2   1  183.96    7.99 
  -1   2   1  186.10    8.29 
  -1   2   1  174.02    8.47 
  -1   2   1  174.99    8.06 
   0  -2  -1 2307.93   91.58 
   0  -2  -1 2172.80   91.34 
   0   2   1 1991.88   91.19 
   0   2   1 2128.36   91.51 
   0   2   1 2011.14   91.63 
  -1  -2  -1 6225.81  279.87 
  -1  -2  -1 6028.00  279.24 
  -1  -2  -1 6979.97  281.40 
  -1  -2  -1 6125.26  281.81 
  -1  -2  -1 6043.21  280.21 
   1   2   1 6953.04  280.34 
   1   2   1 6818.75  286.28 
   1   2   1 6461.35  281.00 
   1   2   1 6879.39  279.89 
  -2  -2  -1  269.57   11.76 
  -2  -2  -1  230.94   11.62 
  -2  -2  -1  271.27   11.44 
  -2  -2  -1  279.64   11.73 
   2   2   1  261.45   11.46 
   2   2   1  263.36   11.45 
   2   2   1  238.28   11.61 
   2   2   1  269.77   11.59 
   2   2   1  258.62   11.69 
  -3  -2  -1 1972.15   97.32 
  -3  -2  -1 2410.99   97.26 
  -3  -2  -1 2190.28   97.18 
   3   2   1 2276.48   97.27 
   3   2   1 2361.34   97.28 
   3   2   1 2373.34   97.70 
   3   2   1 2387.16   97.59 
   3   2   1 2197.66   97.07 
   3   2   1 2373.14   97.22 
   3   2   1 2041.66   97.54 
  -4  -2  -1  112.68    5.28 
  -4  -2  -1   91.92    5.30 
  -4  -2  -1   97.28    4.92 
   4   2   1  106.86    4.89 
   4   2   1  109.43    5.01 
   4   2   1  113.30    5.23 
   4   2   1  104.98    4.89 
   4   2   1  103.25    5.48 
  -5  -2  -1  188.29    8.66 
   5   2   1  182.06    8.75 
   5   2   1  203.11    9.48 
   5   2   1  190.96    8.72 
   5   2   1  193.12    9.06 
  -6  -2  -1   21.09    2.59 
   6   2   1   20.34    3.05 
   6   2   1   19.23    2.75 
   6   2   1   21.50    2.08 
   6   2   1   28.94    1.96 
  -7  -2  -1  217.63   11.46 
   7   2   1  245.03   12.25 
   7   2   1  238.93   10.78 
   7   2   1  248.04   11.52 
   7   2   1  233.64   10.96 
  -8  -2  -1  555.86   28.15 
   8   2   1  624.43   27.59 
   8   2   1  640.88   27.31 
   8   2   1  643.90   28.14 
   8   2   1  646.30   28.93 
  -9  -2  -1  706.51   31.96 
   9   2   1  709.86   32.50 
   9   2   1  688.82   31.54 
   9   2   1  673.45   30.98 
 -10  -2  -1  506.12   24.43 
  10   2   1  515.75   23.94 
  10   2   1  515.65   23.45 
  10   2   1  510.29   25.18 
 -11  -2  -1  277.15   15.08 
  11   2   1  281.15   15.51 
  11   2   1  273.58   13.99 
  11   2   1  280.82   14.82 
  10  -3  -1   99.99    7.54 
  10  -3  -1   94.01    7.86 
 -10   3   1   95.49    8.96 
 -10   3   1   82.58    9.07 
   9  -3  -1  273.74   13.80 
   9  -3  -1  310.03   14.54 
   9  -3  -1  285.61   14.33 
  -9   3   1  275.10   15.81 
  -9   3   1  282.86   15.92 
   8  -3  -1  566.47   26.32 
   8  -3  -1  557.14   26.80 
   8  -3  -1  594.69   26.71 
  -8   3   1  563.48   27.76 
  -8   3   1  648.91   28.15 
   7  -3  -1  386.35   17.61 
   7  -3  -1  366.77   17.53 
   7  -3  -1  370.66   17.28 
  -7   3   1  379.27   18.65 
  -7   3   1  371.30   18.64 
   6  -3  -1  407.00   18.84 
   6  -3  -1  420.01   19.05 
  -6   3   1  388.64   19.85 
  -6   3   1  430.70   19.87 
  -6   3   1  419.48   19.02 
  -6   3   1  429.91   20.21 
   5  -3  -1  344.55   16.41 
   5  -3  -1  353.95   16.44 
  -5   3   1  349.90   16.50 
  -5   3   1  366.25   17.55 
  -5   3   1  383.89   17.49 
  -5   3   1  371.68   17.23 
   4  -3  -1 1085.81   45.21 
   4  -3  -1 1035.28   45.20 
  -4   3   1 1121.64   46.02 
  -4   3   1  950.67   45.18 
  -4   3   1  949.32   45.94 
  -4   3   1 1072.24   45.80 
   3  -3  -1  508.65   22.12 
   3  -3  -1  515.33   22.85 
   3  -3  -1  470.53   22.04 
  -3   3   1  494.50   22.73 
  -3   3   1  512.73   22.11 
  -3   3   1  495.50   22.52 
   2  -3  -1 1535.96   65.97 
   2  -3  -1 1581.93   66.07 
  -2   3   1 1516.92   66.72 
  -2   3   1 1471.86   65.97 
   1  -3  -1 1532.24   69.50 
   1  -3  -1 1543.72   69.07 
   1  -3  -1 1577.48   69.21 
   1  -3  -1 1639.56   69.83 
   1  -3  -1 1600.63   69.70 
   1  -3  -1 1674.09   69.14 
  -1   3   1 1620.61   69.51 
  -1   3   1 1587.63   69.07 
  -1   3   1 1746.99   69.82 
  -1   3   1 1564.08   69.09 
  -1   3   1 1573.26   69.23 
  -1   3   1 1564.24   69.80 
   0  -3  -1  242.84   12.15 
   0  -3  -1  289.72   11.53 
   0  -3  -1  271.68   12.14 
   0  -3  -1  271.03   12.02 
   0  -3  -1  243.03   11.57 
   0  -3  -1  257.21   11.40 
   0   3   1  253.78   12.08 
   0   3   1  270.83   11.41 
   0   3   1  264.97   11.58 
   0   3   1  288.50   12.02 
   0   3   1  234.00   11.44 
   0   3   1  240.83   12.14 
  -1  -3  -1 1429.29   60.97 
  -1  -3  -1 1401.51   60.97 
  -1  -3  -1 1521.17   61.64 
  -1  -3  -1 1385.10   60.99 
  -1  -3  -1 1472.32   61.37 
   1   3   1 1370.69   61.29 
   1   3   1 1300.56   60.88 
   1   3   1 1370.18   61.50 
   1   3   1 1494.66   61.48 
   1   3   1 1386.11   60.97 
  -2  -3  -1  557.18   22.75 
  -2  -3  -1  521.13   23.19 
  -2  -3  -1  543.91   23.13 
  -2  -3  -1  494.60   23.21 
  -2  -3  -1  488.36   22.73 
   2   3   1  487.82   23.04 
   2   3   1  560.12   23.23 
   2   3   1  534.91   22.75 
   2   3   1  521.54   23.06 
   2   3   1  502.39   22.67 
  -3  -3  -1   69.61    3.53 
  -3  -3  -1   81.69    4.16 
  -3  -3  -1   63.22    3.93 
  -3  -3  -1   65.77    3.48 
   3   3   1   67.94    4.07 
   3   3   1   67.77    3.13 
   3   3   1   72.32    3.62 
   3   3   1   66.01    3.39 
   3   3   1   70.15    3.76 
  -4  -3  -1  860.47   33.89 
  -4  -3  -1  704.46   34.35 
  -4  -3  -1  720.41   34.30 
   4   3   1  795.01   33.72 
   4   3   1  797.86   34.10 
   4   3   1  749.42   33.84 
   4   3   1  810.88   33.73 
   4   3   1  786.93   33.87 
   4   3   1  794.48   34.51 
  -5  -3  -1 2365.49  100.75 
  -5  -3  -1 2310.02  100.13 
  -5  -3  -1 2161.21  100.77 
   5   3   1 2210.60  100.10 
   5   3   1 2361.40  100.18 
   5   3   1 2363.36  100.98 
   5   3   1 2421.83  100.12 
   5   3   1 2403.57  100.52 
  -6  -3  -1  339.63   16.26 
  -6  -3  -1  338.23   16.09 
  -6  -3  -1  373.87   15.33 
   6   3   1  332.18   15.39 
   6   3   1  330.60   15.38 
   6   3   1  361.01   15.93 
   6   3   1  345.24   16.38 
  -7  -3  -1 1231.38   53.13 
  -7  -3  -1 1176.56   52.92 
   7   3   1 1228.44   53.35 
   7   3   1 1196.81   52.01 
   7   3   1 1169.81   52.18 
   7   3   1 1204.55   52.71 
  -8  -3  -1  502.71   24.00 
  -8  -3  -1  538.24   24.24 
   8   3   1  510.95   23.72 
   8   3   1  519.37   22.81 
   8   3   1  519.45   23.15 
   8   3   1  512.34   24.35 
  -9  -3  -1  559.95   29.53 
   9   3   1  652.87   28.65 
   9   3   1  682.35   30.40 
   9   3   1  692.70   29.46 
 -10  -3  -1  278.17   15.24 
  10   3   1  308.65   15.05 
  10   3   1  288.30   13.98 
  10   3   1  303.22   15.70 
 -11  -3  -1  284.08   15.02 
  11   3   1  271.95   14.65 
  11   3   1  261.36   15.23 
  10  -4  -1  271.45   15.17 
  10  -4  -1  293.57   15.12 
 -10   4   1  285.52   16.89 
 -10   4   1  287.77   16.77 
   9  -4  -1  273.03   14.18 
   9  -4  -1  251.99   13.53 
   9  -4  -1  272.45   13.99 
  -9   4   1  281.98   15.60 
  -9   4   1  270.31   15.45 
   8  -4  -1  618.13   28.32 
   8  -4  -1  619.32   28.48 
   8  -4  -1  634.68   28.16 
  -8   4   1  579.48   29.23 
  -8   4   1  637.20   29.59 
   7  -4  -1  511.17   23.28 
   7  -4  -1  509.48   23.09 
  -7   4   1  502.68   23.34 
  -7   4   1  526.34   24.57 
  -7   4   1  477.04   24.31 
   6  -4  -1  669.06   29.28 
   6  -4  -1  662.17   29.25 
  -6   4   1  669.40   30.48 
  -6   4   1  573.81   30.11 
  -6   4   1  693.06   29.48 
   5  -4  -1  208.89   10.57 
   5  -4  -1  194.33   11.18 
   5  -4  -1  225.43   10.59 
  -5   4   1  223.32   10.54 
  -5   4   1  203.77   11.41 
  -5   4   1  235.07   11.67 
  -5   4   1  239.25   11.81 
   4  -4  -1  134.68    7.84 
   4  -4  -1  125.50    6.95 
   4  -4  -1  132.45    7.02 
  -4   4   1  141.21    6.91 
  -4   4   1  139.01    8.01 
  -4   4   1  147.59    8.04 
  -4   4   1  147.17    7.63 
   3  -4  -1  673.22   29.00 
   3  -4  -1  624.34   28.85 
   3  -4  -1  639.50   29.75 
  -3   4   1  729.31   29.89 
  -3   4   1  668.82   29.95 
  -3   4   1  600.41   28.86 
  -3   4   1  662.21   29.47 
   2  -4  -1  225.91   11.41 
   2  -4  -1  210.55   10.36 
   2  -4  -1  231.87   10.58 
  -2   4   1  232.01   11.34 
  -2   4   1  222.68   10.91 
  -2   4   1  225.43   11.39 
  -2   4   1  248.74   10.50 
   1  -4  -1  555.75   25.21 
   1  -4  -1  610.83   26.30 
   1  -4  -1  569.79   25.41 
  -1   4   1  540.01   25.25 
  -1   4   1  559.91   26.19 
  -1   4   1  572.23   25.80 
  -1   4   1  639.32   26.23 
   0  -4  -1  843.28   37.33 
   0  -4  -1  804.94   38.29 
   0  -4  -1  838.55   37.49 
   0  -4  -1  945.96   38.37 
   0  -4  -1  880.56   37.33 
   0  -4  -1  863.69   37.58 
   0   4   1  846.97   38.21 
   0   4   1  882.39   38.03 
  -1  -4  -1 1174.76   51.97 
  -1  -4  -1 1188.86   51.97 
  -1  -4  -1 1218.45   52.31 
  -1  -4  -1 1171.78   52.94 
  -1  -4  -1 1123.46   52.99 
  -1  -4  -1 1180.96   52.30 
   1   4   1 1143.08   52.23 
   1   4   1 1215.67   52.20 
   1   4   1 1266.53   52.97 
   1   4   1 1342.14   53.18 
   1   4   1 1261.19   52.79 
  -2  -4  -1 2261.52   95.19 
  -2  -4  -1 2262.71   95.90 
  -2  -4  -1 2145.53   95.75 
   2   4   1 2168.68   95.03 
   2   4   1 2167.12   95.51 
   2   4   1 2241.52   95.68 
   2   4   1 2192.07   95.08 
  -3  -4  -1 1427.52   59.44 
  -3  -4  -1 1375.10   58.68 
  -3  -4  -1 1435.68   59.36 
  -3  -4  -1 1308.17   58.61 
   3   4   1 1293.88   58.48 
   3   4   1 1349.90   58.70 
   3   4   1 1384.25   59.14 
   3   4   1 1264.77   59.02 
  -4  -4  -1 1837.37   76.50 
  -4  -4  -1 1557.71   75.54 
  -4  -4  -1 1849.65   76.39 
   4   4   1 1750.56   75.83 
   4   4   1 1809.31   75.30 
   4   4   1 1770.19   75.96 
   4   4   1 1747.47   75.50 
   4   4   1 1776.17   76.29 
   4   4   1 1661.17   75.27 
  -5  -4  -1  618.45   24.57 
  -5  -4  -1  618.64   25.56 
   5   4   1  537.76   25.39 
   5   4   1  528.66   24.92 
   5   4   1  578.01   24.39 
   5   4   1  528.95   24.37 
   5   4   1  512.36   24.46 
  -6  -4  -1 1594.10   67.90 
  -6  -4  -1 1408.77   68.78 
  -6  -4  -1 1519.04   68.94 
   6   4   1 1635.81   68.49 
   6   4   1 1693.66   69.19 
   6   4   1 1535.32   67.89 
   6   4   1 1627.88   67.91 
  -7  -4  -1  593.74   27.89 
  -7  -4  -1  597.96   27.82 
   7   4   1  601.12   27.98 
   7   4   1  616.15   26.74 
   7   4   1  635.24   27.44 
   7   4   1  606.76   26.54 
  -8  -4  -1 1042.35   50.45 
   8   4   1 1126.24   50.05 
   8   4   1 1197.94   50.98 
   8   4   1 1168.92   49.37 
  -9  -4  -1  128.48    8.50 
   9   4   1  127.34    6.93 
   9   4   1  126.50    9.07 
   9   4   1  135.91    8.08 
 -10  -4  -1  431.79   21.52 
  10   4   1  428.39   20.98 
  10   4   1  450.47   22.23 
 -11  -4  -1  170.70   10.76 
  11   4   1  160.44   10.26 
  11   4   1  153.33   11.59 
   9  -5  -1  573.87   27.90 
   9  -5  -1  629.94   27.91 
   9  -5  -1  561.22   27.38 
  -9   5   1  629.18   29.23 
  -9   5   1  592.57   29.43 
   8  -5  -1  283.68   14.41 
   8  -5  -1  297.35   14.79 
  -8   5   1  309.20   16.47 
  -8   5   1  278.28   16.11 
   7  -5  -1  323.37   16.11 
   7  -5  -1  345.48   16.06 
  -7   5   1  340.02   16.25 
  -7   5   1  346.03   17.22 
  -7   5   1  321.14   17.35 
   6  -5  -1  445.43   20.90 
   6  -5  -1  459.69   20.92 
  -6   5   1  477.96   21.08 
  -6   5   1  418.88   21.70 
  -6   5   1  468.41   22.25 
   5  -5  -1  514.82   24.93 
   5  -5  -1  552.76   25.11 
  -5   5   1  570.81   25.16 
  -5   5   1  590.15   26.15 
  -5   5   1  562.52   26.28 
   4  -5  -1  923.62   41.34 
   4  -5  -1  983.06   41.50 
   4  -5  -1  960.85   42.48 
  -4   5   1  943.11   41.40 
  -4   5   1  915.65   42.41 
  -4   5   1  925.15   42.10 
   3  -5  -1  341.84   16.52 
   3  -5  -1  353.72   16.65 
   3  -5  -1  404.81   17.96 
  -3   5   1  359.60   17.25 
  -3   5   1  388.62   17.81 
  -3   5   1  352.18   16.54 
   2  -5  -1  707.97   32.64 
   2  -5  -1  675.90   31.44 
   2  -5  -1  725.56   31.72 
  -2   5   1  739.63   32.76 
  -2   5   1  697.55   32.54 
  -2   5   1  677.33   32.17 
  -2   5   1  808.33   31.60 
   1  -5  -1  870.08   38.40 
   1  -5  -1  932.84   39.76 
   1  -5  -1  864.70   38.66 
  -1   5   1  907.34   38.52 
  -1   5   1  792.56   39.51 
  -1   5   1  898.08   39.54 
  -1   5   1  923.87   39.23 
   0  -5  -1  888.15   43.79 
   0  -5  -1 1002.75   42.95 
   0  -5  -1  956.62   42.63 
   0  -5  -1  981.28   42.62 
   0  -5  -1 1088.41   43.95 
   0   5   1  977.65   43.72 
   0   5   1  978.35   43.45 
   0   5   1 1058.63   44.08 
   0   5   1  935.77   42.75 
  -1  -5  -1 1634.23   75.89 
  -1  -5  -1 1710.00   74.97 
  -1  -5  -1 1831.46   75.05 
  -1  -5  -1 1699.77   74.59 
  -1  -5  -1 1607.05   75.75 
  -1  -5  -1 1756.64   74.59 
   1   5   1 1703.97   75.74 
   1   5   1 1750.33   75.56 
   1   5   1 1904.61   74.90 
  -2  -5  -1 1426.94   61.86 
  -2  -5  -1 1507.86   62.84 
  -2  -5  -1 1273.72   62.45 
  -2  -5  -1 1396.55   61.30 
  -2  -5  -1 1585.38   61.34 
   2   5   1 1409.61   61.65 
   2   5   1 1404.54   62.23 
   2   5   1 1386.03   62.42 
  -3  -5  -1 1165.36   51.54 
  -3  -5  -1 1224.53   51.69 
  -3  -5  -1 1138.31   50.63 
   3   5   1 1212.20   51.27 
   3   5   1 1078.31   50.46 
   3   5   1 1129.72   51.27 
   3   5   1 1217.77   50.72 
  -4  -5  -1 1922.90   86.13 
  -4  -5  -1 2123.38   86.39 
   4   5   1 2076.20   85.83 
   4   5   1 1865.08   85.00 
   4   5   1 1944.92   85.91 
   4   5   1 1896.80   85.38 
  -5  -5  -1 1808.79   71.75 
  -5  -5  -1 1710.12   72.90 
  -5  -5  -1 1652.11   72.91 
   5   5   1 1564.03   71.57 
   5   5   1 1608.13   71.34 
   5   5   1 1735.49   72.76 
   5   5   1 1710.14   71.40 
   5   5   1 1485.53   72.94 
   5   5   1 1657.69   72.13 
  -6  -5  -1  889.09   35.14 
  -6  -5  -1  764.64   36.34 
  -6  -5  -1  743.61   36.39 
   6   5   1  816.95   36.48 
   6   5   1  823.81   34.95 
   6   5   1  775.41   35.01 
   6   5   1  802.31   34.99 
   6   5   1  837.56   35.82 
  -7  -5  -1  268.74   13.95 
  -7  -5  -1  287.60   14.22 
   7   5   1  286.25   14.22 
   7   5   1  262.97   12.28 
   7   5   1  260.26   13.20 
  -8  -5  -1  500.11   25.91 
   8   5   1  527.52   24.65 
   8   5   1  584.48   26.45 
   8   5   1  622.18   25.62 
  -9  -5  -1  115.84    8.15 
   9   5   1  105.59    6.75 
   9   5   1   99.89    7.64 
 -10  -5  -1   39.89    5.92 
  10   5   1   52.05    5.96 
  10   5   1   43.76    5.55 
 -11  -5  -1  145.18   10.25 
  11   5   1  145.59    9.66 
  11   5   1  135.64   11.11 
   9  -6  -1  292.30   14.68 
   9  -6  -1  284.70   15.02 
   9  -6  -1  258.95   15.04 
  -9   6   1  287.29   16.79 
  -9   6   1  296.56   17.18 
   8  -6  -1  551.75   26.42 
   8  -6  -1  574.90   26.65 
  -8   6   1  589.07   26.54 
  -8   6   1  578.00   28.25 
  -8   6   1  568.82   28.43 
   7  -6  -1   74.43    6.19 
   7  -6  -1   83.91    6.12 
  -7   6   1   77.85    8.10 
  -7   6   1   89.16    5.75 
  -7   6   1   83.70    6.87 
   6  -6  -1  244.65   12.18 
   6  -6  -1  242.89   11.89 
  -6   6   1  225.72   12.14 
  -6   6   1  261.73   13.59 
  -6   6   1  237.94   13.84 
   5  -6  -1  286.33   14.41 
   5  -6  -1  292.90   14.54 
  -5   6   1  320.62   14.42 
  -5   6   1  295.96   16.06 
  -5   6   1  329.44   15.53 
   4  -6  -1 1262.55   55.97 
   4  -6  -1 1275.75   56.12 
   4  -6  -1 1271.80   57.33 
  -4   6   1 1303.14   57.37 
  -4   6   1 1284.17   56.99 
  -4   6   1 1288.19   56.02 
   3  -6  -1  764.65   31.58 
   3  -6  -1  711.62   31.25 
  -3   6   1  646.68   32.58 
  -3   6   1  721.75   31.31 
  -3   6   1  695.44   32.12 
   2  -6  -1 1878.41   78.47 
   2  -6  -1 1875.96   78.17 
   2  -6  -1 1705.04   79.49 
  -2   6   1 1729.28   79.40 
  -2   6   1 1773.55   79.03 
  -2   6   1 1913.49   79.80 
  -2   6   1 1761.49   78.22 
   1  -6  -1 1918.67   95.02 
   1  -6  -1 2273.56   94.11 
   1  -6  -1 2351.99   93.78 
  -1   6   1 2142.22   95.25 
  -1   6   1 2157.14   93.86 
  -1   6   1 2123.30   95.03 
  -1   6   1 2236.39   94.72 
   0  -6  -1 2439.39  100.78 
   0  -6  -1 2311.69  100.34 
   0  -6  -1 2354.55  101.97 
   0   6   1 2266.23  100.52 
   0   6   1 2221.54  101.62 
   0   6   1 2381.76  101.38 
  -1  -6  -1 1986.78   87.38 
  -1  -6  -1 2038.55   86.93 
  -1  -6  -1 2048.16   88.49 
  -1  -6  -1 2024.94   86.95 
   1   6   1 2116.87   88.13 
   1   6   1 1980.48   88.32 
   1   6   1 1940.15   87.22 
  -2  -6  -1  949.95   39.54 
  -2  -6  -1  839.73   38.09 
  -2  -6  -1  820.77   37.50 
  -2  -6  -1  874.46   37.53 
   2   6   1  883.56   38.04 
   2   6   1  873.14   39.05 
   2   6   1  859.17   38.76 
  -3  -6  -1 1981.24   85.65 
  -3  -6  -1 1847.45   85.65 
  -3  -6  -1 1953.12   84.52 
   3   6   1 2041.23   85.21 
   3   6   1 2047.59   84.54 
   3   6   1 1847.63   85.30 
  -4  -6  -1  419.44   20.17 
  -4  -6  -1  453.54   20.22 
  -4  -6  -1  413.40   18.86 
   4   6   1  414.49   19.67 
   4   6   1  412.81   18.99 
   4   6   1  412.33   19.71 
  -5  -6  -1  864.12   36.05 
  -5  -6  -1  730.06   35.58 
  -5  -6  -1  768.49   34.35 
   5   6   1  796.75   35.47 
   5   6   1  764.23   34.70 
  -6  -6  -1  265.84   13.51 
  -6  -6  -1  254.25   11.44 
  -6  -6  -1  252.69   13.21 
   6   6   1  251.29   11.01 
   6   6   1  234.67   12.16 
   6   6   1  247.43   12.81 
  -7  -6  -1  160.58    9.61 
   7   6   1  138.08    8.25 
   7   6   1  151.29    8.90 
  -8  -6  -1  357.10   18.38 
   8   6   1  362.81   17.37 
   8   6   1  362.73   18.40 
  -9  -6  -1  334.49   17.72 
   9   6   1  348.20   17.55 
   9   6   1  329.66   16.67 
 -10  -6  -1  134.56   10.02 
  10   6   1  143.89    9.02 
  10   6   1  134.35   10.57 
   8  -7  -1   52.56    5.68 
   8  -7  -1   44.43    5.96 
  -8   7   1   45.70    4.93 
  -8   7   1   46.08    6.39 
  -8   7   1   45.67    7.49 
   7  -7  -1  364.73   17.93 
   7  -7  -1  371.41   17.76 
  -7   7   1  370.27   18.01 
  -7   7   1  400.54   19.39 
  -7   7   1  349.60   19.68 
   6  -7  -1  402.00   18.61 
   6  -7  -1  392.48   18.52 
  -6   7   1  373.35   19.60 
  -6   7   1  400.38   20.63 
  -6   7   1  389.78   18.64 
   5  -7  -1  657.42   30.82 
   5  -7  -1  654.22   31.03 
  -5   7   1  697.05   32.19 
  -5   7   1  709.48   30.97 
  -5   7   1  719.17   32.72 
   4  -7  -1 1160.73   51.29 
   4  -7  -1 1132.33   50.99 
  -4   7   1 1122.94   52.55 
  -4   7   1 1122.12   51.06 
  -4   7   1 1285.27   52.35 
   3  -7  -1  948.90   43.05 
   3  -7  -1  954.78   41.65 
   3  -7  -1  948.22   41.36 
  -3   7   1  903.34   42.45 
  -3   7   1  864.69   41.35 
  -3   7   1 1025.58   43.20 
   2  -7  -1  815.72   35.58 
   2  -7  -1  792.64   35.15 
   2  -7  -1  893.37   37.19 
  -2   7   1  874.65   36.91 
  -2   7   1  721.21   36.08 
  -2   7   1  766.98   35.25 
  -2   7   1  738.61   36.83 
   1  -7  -1 2361.91  101.14 
   1  -7  -1 2260.74   99.63 
  -1   7   1 2242.21  100.76 
  -1   7   1 2513.50   99.49 
  -1   7   1 2108.92  100.23 
   0  -7  -1  702.58   31.01 
   0  -7  -1  717.85   31.51 
   0  -7  -1  744.72   33.08 
   0   7   1  700.42   31.26 
   0   7   1  692.14   32.18 
   0   7   1  707.06   32.70 
  -1  -7  -1  831.09   38.49 
  -1  -7  -1  837.66   36.47 
  -1  -7  -1  828.43   37.03 
  -1  -7  -1  823.09   36.49 
   1   7   1  821.17   36.83 
   1   7   1  853.32   38.23 
   1   7   1  898.69   37.94 
  -2  -7  -1  547.51   25.68 
  -2  -7  -1  577.61   25.01 
  -2  -7  -1  577.25   25.04 
  -2  -7  -1  567.16   27.23 
  -2  -7  -1  583.78   27.10 
   2   7   1  605.17   26.97 
   2   7   1  575.01   25.60 
   2   7   1  590.26   26.65 
  -3  -7  -1  696.56   31.76 
  -3  -7  -1  795.34   33.60 
  -3  -7  -1  722.24   33.13 
   3   7   1  696.20   31.72 
   3   7   1  688.55   32.48 
   3   7   1  717.29   32.91 
  -4  -7  -1  270.18   12.82 
  -4  -7  -1  260.43   14.26 
  -4  -7  -1  282.79   14.54 
   4   7   1  282.77   13.72 
   4   7   1  288.06   13.91 
   4   7   1  273.11   12.91 
  -5  -7  -1  273.01   13.40 
  -5  -7  -1  300.06   15.44 
   5   7   1  294.62   14.75 
   5   7   1  300.04   13.79 
   6   7   1  492.56   23.89 
   6   7   1  511.52   22.99 
  -7  -7  -1  381.46   20.21 
   7   7   1  401.80   19.95 
   7   7   1  421.26   18.94 
  -8  -7  -1  479.63   24.46 
   8   7   1  500.05   23.13 
   8   7   1  504.73   24.29 
  -9  -7  -1  340.00   18.51 
   9   7   1  335.31   18.41 
   9   7   1  360.98   17.21 
 -10  -7  -1  340.12   18.74 
  10   7   1  352.48   18.19 
  10   7   1  317.03   17.06 
   8  -8  -1  119.48    7.73 
   8  -8  -1  120.36    8.44 
  -8   8   1  114.93   10.53 
  -8   8   1  107.77    8.42 
  -8   8   1  118.61   10.59 
   7  -8  -1  331.06   16.57 
   7  -8  -1  335.94   16.69 
  -7   8   1  341.54   16.35 
  -7   8   1  319.97   18.96 
  -7   8   1  328.56   17.85 
   6  -8  -1  421.22   20.22 
   6  -8  -1  403.27   19.92 
  -6   8   1  440.12   21.74 
  -6   8   1  439.12   22.20 
  -6   8   1  403.74   19.99 
   5  -8  -1  295.51   14.73 
   5  -8  -1  302.04   14.84 
  -5   8   1  283.88   16.70 
  -5   8   1  328.85   14.76 
  -5   8   1  313.50   16.06 
   4  -8  -1  882.66   38.55 
   4  -8  -1  832.98   38.15 
  -4   8   1  858.11   38.35 
  -4   8   1  853.04   40.16 
  -4   8   1  884.52   39.60 
   3  -8  -1  534.88   24.24 
   3  -8  -1  544.86   23.73 
  -3   8   1  512.41   25.69 
  -3   8   1  538.09   23.95 
  -3   8   1  505.62   25.14 
   2  -8  -1  802.47   36.24 
   2  -8  -1  838.63   37.95 
   2  -8  -1  809.30   35.77 
  -2   8   1  776.51   37.62 
  -2   8   1  862.31   35.99 
  -2   8   1  783.70   37.09 
   1  -8  -1  889.77   42.98 
   1  -8  -1  996.79   41.54 
  -1   8   1  886.45   41.09 
  -1   8   1  977.81   42.43 
   0  -8  -1   40.37    2.88 
   0  -8  -1   40.11    3.31 
   0  -8  -1   46.29    5.60 
   0   8   1   50.64    5.42 
   0   8   1   40.24    3.24 
   0   8   1   31.88    3.97 
  -1  -8  -1  685.77   31.26 
  -1  -8  -1  755.32   33.18 
  -1  -8  -1  684.24   30.58 
   1   8   1  737.90   31.05 
   1   8   1  664.66   32.53 
   1   8   1  687.00   32.17 
  -2  -8  -1  106.86    8.24 
  -2  -8  -1  108.76    5.33 
  -2  -8  -1  114.66    5.37 
  -2  -8  -1  119.05    6.40 
   2   8   1  116.63    7.66 
   2   8   1  131.74    8.02 
   2   8   1  120.03    6.13 
  -3  -8  -1  321.13   16.15 
  -3  -8  -1  283.51   14.03 
  -3  -8  -1  338.62   16.27 
   3   8   1  290.94   13.99 
   3   8   1  295.72   15.19 
   3   8   1  276.83   15.25 
  -4  -8  -1  297.31   16.45 
  -4  -8  -1  313.11   14.58 
   4   8   1  321.09   14.60 
   4   8   1  310.80   15.43 
  -5  -8  -1  343.45   16.74 
  -5  -8  -1  276.86   14.34 
   5   8   1  309.36   15.77 
   5   8   1  310.44   14.60 
  -6  -8  -1  602.66   29.63 
   6   8   1  618.00   28.98 
   6   8   1  626.28   27.88 
  -7  -8  -1  603.45   29.26 
   7   8   1  602.58   28.41 
   7   8   1  595.62   27.46 
  -8  -8  -1  412.86   21.58 
   8   8   1  409.23   21.01 
   8   8   1  409.35   19.65 
  -9  -8  -1  260.76   14.95 
   9   8   1  216.24   12.59 
   9   8   1  229.07   13.65 
 -10  -8  -1  725.00   34.46 
  10   8   1  665.57   32.52 
  10   8   1  712.20   34.19 
   7  -9  -1  574.45   27.22 
   7  -9  -1  563.57   26.76 
  -7   9   1  589.88   29.59 
  -7   9   1  558.95   27.04 
  -7   9   1  597.38   29.12 
   6  -9  -1  347.81   17.02 
   6  -9  -1  332.32   16.95 
  -6   9   1  349.09   19.49 
  -6   9   1  375.49   19.17 
  -6   9   1  331.66   16.73 
   5  -9  -1  553.35   25.49 
   5  -9  -1  587.30   26.00 
  -5   9   1  536.30   26.92 
  -5   9   1  525.65   27.75 
  -5   9   1  571.23   25.67 
   4  -9  -1  567.45   26.13 
   4  -9  -1  544.38   25.50 
  -4   9   1  567.78   27.39 
  -4   9   1  573.05   28.03 
  -4   9   1  567.19   25.82 
   3  -9  -1   88.50    5.61 
   3  -9  -1   81.87    5.36 
  -3   9   1   78.06    7.93 
  -3   9   1   74.49    5.53 
  -3   9   1   83.79    7.41 
   2  -9  -1  241.69   11.68 
   2  -9  -1  220.60   11.11 
  -2   9   1  218.39   12.50 
  -2   9   1  246.93   11.46 
  -2   9   1  233.15   13.65 
   1  -9  -1   20.33    2.54 
   1  -9  -1   19.20    4.41 
   1  -9  -1   21.91    3.05 
  -1   9   1   24.03    3.08 
  -1   9   1   16.20    4.18 
  -1   9   1   16.53    3.40 
   0  -9  -1  450.06   22.34 
   0  -9  -1  461.85   20.33 
   0  -9  -1  435.34   19.50 
   0   9   1  402.41   21.13 
   0   9   1  470.35   19.93 
   0   9   1  399.38   21.67 
  -1  -9  -1   34.43    3.78 
  -1  -9  -1   31.36    2.48 
  -1  -9  -1   35.16    5.96 
   1   9   1   25.79    5.25 
   1   9   1   28.05    4.40 
   1   9   1   32.25    3.14 
  -2  -9  -1  672.00   32.30 
  -2  -9  -1  701.89   31.43 
  -2  -9  -1  732.56   34.49 
   2   9   1  750.17   34.03 
   2   9   1  704.90   33.27 
   2   9   1  786.19   32.19 
  -3  -9  -1  634.38   32.70 
   3   9   1  704.62   32.03 
   3   9   1  724.96   30.71 
  -4  -9  -1  557.87   26.92 
  -4  -9  -1  536.78   24.58 
   4   9   1  549.70   25.90 
   4   9   1  526.45   24.53 
  -5  -9  -1  403.95   18.74 
  -5  -9  -1  388.55   21.03 
   5   9   1  411.02   20.19 
   5   9   1  416.75   18.81 
  -6  -9  -1  731.84   35.93 
   6   9   1  765.50   33.95 
   6   9   1  766.86   35.19 
  -7  -9  -1  308.22   17.43 
   7   9   1  312.17   16.84 
   7   9   1  316.01   15.32 
  -8  -9  -1  277.83   16.23 
   8   9   1  264.40   14.29 
   8   9   1  286.73   15.33 
  -9  -9  -1  244.68   15.86 
   9   9   1  268.81   15.56 
   9   9   1  250.04   13.45 
   6 -10  -1  234.31   12.62 
   6 -10  -1  255.89   13.28 
  -6  10   1  242.87   12.73 
  -6  10   1  206.83   15.22 
  -6  10   1  234.93   14.17 
   5 -10  -1  198.91   10.67 
   5 -10  -1  197.73   11.28 
  -5  10   1  184.58   12.83 
  -5  10   1  198.92   13.67 
  -5  10   1  187.91   10.76 
   4 -10  -1   26.42    4.24 
   4 -10  -1   33.72    4.35 
  -4  10   1   25.03    5.70 
  -4  10   1   33.60    5.34 
  -4  10   1   31.86    4.63 
   3 -10  -1  271.58   13.47 
   3 -10  -1  263.61   14.14 
  -3  10   1  305.04   16.55 
  -3  10   1  281.38   15.58 
  -3  10   1  271.44   13.72 
   2 -10  -1  114.08    6.86 
   2 -10  -1  117.51    7.69 
  -2  10   1  127.76    9.10 
  -2  10   1  123.01    8.33 
  -2  10   1  113.63    6.93 
   1 -10  -1  244.01   11.85 
   1 -10  -1  259.90   12.81 
  -1  10   1  244.81   14.69 
  -1  10   1  254.90   12.17 
  -1  10   1  241.71   13.48 
   0 -10  -1  605.80   29.21 
   0 -10  -1  564.87   26.78 
   0 -10  -1  579.77   25.95 
   0  10   1  601.21   26.39 
   0  10   1  598.33   28.71 
   0  10   1  559.57   27.83 
  -1 -10  -1  524.60   25.03 
  -1 -10  -1  521.54   24.07 
  -1 -10  -1  554.32   27.45 
   1  10   1  594.68   27.11 
   1  10   1  524.49   26.14 
   1  10   1  558.75   24.65 
  -2 -10  -1  292.46   16.30 
  -2 -10  -1  284.37   13.69 
   2  10   1  271.41   13.21 
   2  10   1  263.18   14.90 
  -3 -10  -1  890.70   42.14 
   3  10   1  898.11   39.49 
   3  10   1  887.26   41.02 
  -4 -10  -1 1000.81   44.10 
  -4 -10  -1  999.32   46.54 
   4  10   1  988.21   45.44 
   4  10   1  983.62   43.91 
  -5 -10  -1  542.71   27.09 
  -5 -10  -1  517.79   24.33 
   5  10   1  508.24   25.83 
   5  10   1  554.71   24.36 
  -6 -10  -1  484.99   23.94 
   6  10   1  437.96   22.49 
   6  10   1  420.05   20.92 
  -7 -10  -1   93.51    9.42 
   7  10   1   81.52    6.28 
   7  10   1   85.97    7.42 
  -8 -10  -1  112.29   10.37 
   8  10   1   97.97    9.68 
   8  10   1  119.68    7.64 
  -9 -10  -1   32.89    6.95 
   9  10   1   39.93    6.83 
   9  10   1   31.84    6.99 
   5 -11  -1  179.93   10.94 
   5 -11  -1  183.97   10.13 
  -5  11   1  157.70   13.20 
  -5  11   1  168.39   12.66 
  -5  11   1  174.58   10.24 
   4 -11  -1   10.38    3.25 
   4 -11  -1   16.53    3.40 
  -4  11   1   15.66    5.65 
  -4  11   1   16.59    3.64 
  -4  11   1   14.26    4.33 
   3 -11  -1  459.87   21.88 
   3 -11  -1  484.35   22.67 
  -3  11   1  492.06   22.13 
  -3  11   1  458.72   24.81 
  -3  11   1  463.56   24.02 
   2 -11  -1  122.80    7.59 
   2 -11  -1  156.90    9.20 
  -2  11   1  147.06   10.56 
  -2  11   1  167.20    8.42 
  -2  11   1  139.49   11.18 
   1 -11  -1  263.58   13.56 
   1 -11  -1  263.26   12.53 
  -1  11   1  270.08   13.04 
  -1  11   1  269.56   14.91 
  -1  11   1  237.41   15.52 
   0 -11  -1  613.38   27.13 
   0 -11  -1  617.52   28.10 
   0  11   1  603.13   29.06 
   0  11   1  600.41   30.15 
   0  11   1  609.19   27.53 
  -1 -11  -1  799.94   38.02 
  -1 -11  -1  818.80   35.40 
   1  11   1  739.09   36.23 
   1  11   1  764.40   34.84 
  -2 -11  -1  971.62   43.77 
  -2 -11  -1  892.20   40.85 
   2  11   1  890.57   40.41 
   2  11   1  896.98   42.15 
  -3 -11  -1  953.37   46.69 
  -3 -11  -1 1185.65   49.99 
   3  11   1 1097.04   46.50 
   3  11   1  971.56   47.94 
  -4 -11  -1   21.65    5.57 
  -4 -11  -1   17.89    3.04 
   4  11   1   13.73    4.89 
   4  11   1   19.28    3.22 
  -5 -11  -1  467.28   25.49 
   5  11   1  496.09   22.16 
   5  11   1  464.86   23.65 
  -6 -11  -1  159.77   11.94 
   6  11   1  135.64    9.67 
   6  11   1  125.72    8.12 
  -7 -11  -1  203.92   14.59 
   7  11   1  208.58   11.50 
   7  11   1  219.77   13.75 
  -8 -11  -1  107.15   11.02 
   8  11   1  104.99   10.19 
   4 -12  -1  206.03   11.27 
   4 -12  -1  197.03   12.34 
  -4  12   1  213.71   15.18 
  -4  12   1  208.61   14.16 
  -4  12   1  219.25   11.68 
   3 -12  -1  488.58   22.49 
   3 -12  -1  514.20   23.30 
  -3  12   1  447.35   25.73 
  -3  12   1  499.86   24.72 
  -3  12   1  473.52   22.77 
   2 -12  -1  679.36   30.88 
  -2  12   1  676.12   30.37 
  -2  12   1  698.44   32.66 
  -2  12   1  618.93   33.21 
   1 -12  -1  820.41   37.07 
  -1  12   1  833.56   38.26 
  -1  12   1  782.44   36.33 
   0 -12  -1  361.16   16.91 
   0  12   1  326.20   16.01 
   0  12   1  315.33   18.10 
  -1 -12  -1  328.72   16.36 
   1  12   1  311.03   17.20 
   1  12   1  336.97   15.80 
  -2 -12  -1  478.52   24.12 
  -2 -12  -1  425.33   20.34 
   2  12   1  396.34   19.67 
   2  12   1  402.56   21.72 
  -3 -12  -1   30.17    6.55 
  -3 -12  -1   30.48    4.03 
   3  12   1   26.93    3.99 
   3  12   1   34.58    5.90 
  -4 -12  -1  371.67   21.73 
  -4 -12  -1  378.91   18.69 
   4  12   1  397.45   18.21 
   4  12   1  374.80   19.77 
  -5 -12  -1   15.86    6.03 
   5  12   1   19.79    3.26 
   5  12   1   17.65    5.58 
  -6 -12  -1   63.62    9.66 
   6  12   1   64.47    7.23 
  -7 -12  -1  350.22   20.68 
   7  12   1  324.72   19.27 
   2 -13  -1  311.36   15.70 
  -2  13   1  310.70   17.42 
  -2  13   1  255.95   14.42 
   1 -13  -1  323.65   17.18 
  -1  13   1  350.02   18.39 
  -1  13   1  330.55   16.31 
   0 -13  -1  451.84   21.30 
   0  13   1  414.42   20.31 
   0  13   1  435.52   22.77 
  -1 -13  -1  234.53   12.83 
   1  13   1  248.38   14.66 
   1  13   1  221.06   11.86 
  -2 -13  -1  183.75   10.72 
   2  13   1  179.38   10.09 
   2  13   1  188.46   12.60 
  -3 -13  -1   23.65    3.99 
   3  13   1   15.19    3.07 
   3  13   1   15.11    4.46 
  -4 -13  -1  439.31   25.07 
   4  13   1  448.42   23.32 
  -5 -13  -1  144.10   13.12 
   5  13   1  141.17   11.51 
  -1 -14  -1  407.73   20.96 
   1  14   1  439.54   22.83 
  -2 -14  -1  166.59   10.40 
   2  14   1  157.66   12.17 
   4  13  -2  406.15   22.04 
   4  13  -2  401.75   19.97 
   3  13  -2  465.13   22.80 
   3  13  -2  485.07   24.86 
   2  13  -2  325.66   18.63 
   2  13  -2  330.25   16.60 
   1  13  -2  197.02   12.47 
   1  13  -2  200.60   11.15 
  -1 -13   2  188.75   11.33 
   0  13  -2  292.83   17.79 
   0  13  -2  344.87   16.04 
   0 -13   2  297.60   15.96 
  -1  13  -2   62.29    6.35 
  -1  13  -2   52.97    8.51 
   1 -13   2   73.82    6.81 
  -2  13  -2   80.17    7.25 
  -2  13  -2   98.75    9.79 
   2 -13   2   96.52    6.97 
   6  12  -2  521.51   24.57 
   6  12  -2  501.90   25.80 
  -6 -12   2  495.92   28.15 
   5  12  -2  439.05   21.50 
   5  12  -2  444.71   23.38 
  -5 -12   2  436.94   25.21 
   4  12  -2  381.44   19.94 
   4  12  -2  350.58   17.91 
  -4 -12   2  349.80   21.51 
   3  12  -2  407.00   19.74 
   3  12  -2  404.91   20.99 
   2  12  -2  125.96   10.04 
   2  12  -2  125.17    8.11 
  -2 -12   2  115.29    8.61 
   1  12  -2  420.56   20.44 
   1  12  -2  426.37   21.83 
  -1 -12   2  435.87   20.54 
   0  12  -2  187.19    9.93 
   0  12  -2  167.83   12.08 
   0 -12   2  185.23   10.32 
  -1  12  -2  198.70   10.90 
  -1  12  -2  192.15   13.78 
  -1  12  -2  195.41   12.12 
   1 -12   2  189.48   10.92 
  -2  12  -2  211.03   12.67 
  -2  12  -2  261.50   15.05 
  -2  12  -2  241.18   15.63 
   2 -12   2  257.79   13.22 
  -3  12  -2  316.81   16.12 
  -3  12  -2  312.31   19.04 
  -3  12  -2  319.74   18.19 
   3 -12   2  325.03   16.52 
   3 -12   2  317.03   15.44 
  -4  12  -2  212.46   14.53 
  -4  12  -2  206.15   12.32 
  -4  12  -2  240.67   15.68 
   4 -12   2  220.10   11.79 
   4 -12   2  236.52   12.97 
   7  11  -2  396.71   19.74 
   7  11  -2  391.08   21.28 
  -7 -11   2  388.71   23.39 
   6  11  -2  272.18   16.25 
   6  11  -2  276.69   14.67 
  -6 -11   2  279.82   17.91 
   5  11  -2  172.42   12.23 
   5  11  -2  183.42   10.16 
  -5 -11   2  185.24   13.86 
   4  11  -2   90.27    7.12 
   4  11  -2   89.72    8.87 
  -4 -11   2  106.72   10.54 
   3  11  -2  485.09   23.56 
   3  11  -2  485.52   24.94 
  -3 -11   2  531.63   26.90 
   2  11  -2   40.68    5.99 
   2  11  -2   44.45    5.08 
  -2 -11   2   43.68    7.93 
  -2 -11   2   46.88    4.77 
   1  11  -2  250.73   14.11 
   1  11  -2  253.72   13.04 
  -1 -11   2  257.35   12.80 
   0  11  -2  530.98   26.27 
   0  11  -2  521.56   24.73 
   0  11  -2  567.63   27.30 
   0 -11   2  523.51   24.71 
   0 -11   2  527.68   23.95 
  -1  11  -2  420.21   21.79 
  -1  11  -2  470.10   23.57 
  -1  11  -2  466.82   24.32 
   1 -11   2  494.52   22.10 
   1 -11   2  478.51   21.22 
  -2  11  -2 1063.20   49.78 
  -2  11  -2 1085.14   47.51 
  -2  11  -2 1055.53   49.03 
   2 -11   2 1066.54   47.58 
   2 -11   2 1046.22   46.83 
  -3  11  -2  673.04   30.92 
  -3  11  -2  651.69   33.22 
  -3  11  -2  696.16   32.71 
   3 -11   2  684.50   31.14 
   3 -11   2  667.92   30.36 
  -4  11  -2  894.67   42.72 
  -4  11  -2  862.40   43.40 
  -4  11  -2  914.62   40.82 
   4 -11   2  927.42   40.51 
   4 -11   2  925.80   41.01 
  -5  11  -2  379.87   21.08 
  -5  11  -2  373.52   18.80 
  -5  11  -2  408.84   21.90 
   5 -11   2  390.62   19.03 
   5 -11   2  377.07   18.63 
   8  10  -2  129.87   10.80 
   8  10  -2  115.28    8.09 
  -8 -10   2  117.04   12.76 
   7  10  -2  122.52    8.85 
   7  10  -2  133.29   10.56 
  -7 -10   2  135.34   11.95 
   6  10  -2  433.99   21.79 
   6  10  -2  423.11   20.48 
  -6 -10   2  404.87   23.06 
   5  10  -2  139.23    9.48 
   5  10  -2  145.62    9.01 
  -5 -10   2  152.75   11.87 
   4  10  -2  226.86   11.84 
   4  10  -2  209.16   13.06 
  -4 -10   2  225.34   14.54 
   3  10  -2  342.59   15.84 
   3  10  -2  317.66   17.26 
  -3 -10   2  322.39   15.34 
  -3 -10   2  317.05   18.55 
   2  10  -2   89.36    6.12 
   2  10  -2   77.79    7.46 
  -2 -10   2   74.06    8.65 
  -2 -10   2   79.31    5.52 
   1  10  -2  943.61   42.56 
   1  10  -2  922.74   44.39 
   1  10  -2 1010.69   43.95 
  -1 -10   2  945.76   42.33 
  -1 -10   2  954.81   44.98 
   0  10  -2  695.18   31.35 
   0  10  -2  730.48   33.49 
   0  10  -2  662.47   32.39 
   0 -10   2  680.63   31.26 
  -1  10  -2  488.01   24.27 
  -1  10  -2  478.91   23.61 
  -1  10  -2  473.48   22.15 
   1 -10   2  471.30   22.15 
   1 -10   2  470.68   21.44 
  -2  10  -2 1131.02   49.94 
  -2  10  -2 1113.19   51.87 
  -2  10  -2 1184.96   51.46 
   2 -10   2 1084.23   49.35 
   2 -10   2 1119.44   49.88 
  -3  10  -2  609.26   29.32 
  -3  10  -2  591.40   29.83 
  -3  10  -2  594.97   27.78 
   3 -10   2  614.03   27.78 
   3 -10   2  616.85   27.35 
  -4  10  -2  582.88   27.40 
  -4  10  -2  620.93   29.70 
  -4  10  -2  559.29   28.89 
   4 -10   2  595.61   27.03 
   4 -10   2  602.95   27.59 
  -5  10  -2  150.47   11.26 
  -5  10  -2  160.41    9.67 
  -5  10  -2  162.47   12.50 
   5 -10   2  163.15    9.82 
   5 -10   2  159.00    9.17 
  -6  10  -2  175.15   10.63 
  -6  10  -2  192.81   13.64 
  -6  10  -2  167.63   11.50 
   6 -10   2  173.68   10.71 
   6 -10   2  172.73   10.18 
  -7  10  -2  233.16   14.71 
  -7  10  -2  210.67   12.56 
  -7  10  -2  206.44   14.63 
   7 -10   2  229.11   12.31 
   8   9  -2  154.27   10.17 
   8   9  -2  148.06   11.53 
  -8  -9   2  166.35   12.86 
   7   9  -2  107.94    8.45 
   7   9  -2  111.88    7.46 
  -7  -9   2  120.94   11.46 
   6   9  -2  159.51    9.58 
   6   9  -2  164.17   10.11 
  -6  -9   2  154.25   11.98 
   5   9  -2  385.41   18.34 
   5   9  -2  371.50   19.23 
  -5  -9   2  373.77   20.94 
   4   9  -2  353.98   16.95 
   4   9  -2  347.04   17.58 
  -4  -9   2  346.81   19.22 
   3   9  -2  292.43   15.83 
   3   9  -2  308.98   15.24 
  -3  -9   2  311.18   17.01 
  -3  -9   2  327.54   14.55 
   2   9  -2 1722.94   77.52 
   2   9  -2 1719.27   76.62 
   2   9  -2 1774.90   78.26 
   2   9  -2 1794.92   75.65 
  -2  -9   2 1662.50   78.56 
  -2  -9   2 1824.14   76.26 
   1   9  -2  839.13   38.49 
   1   9  -2  823.20   36.05 
   1   9  -2  799.68   36.79 
   1   9  -2  831.70   37.97 
  -1  -9   2  826.68   36.61 
  -1  -9   2  830.92   39.03 
   0   9  -2  724.70   30.70 
   0   9  -2  666.89   29.92 
   0   9  -2  689.59   31.63 
   0   9  -2  619.55   32.12 
   0  -9   2  692.41   30.41 
   0  -9   2  687.12   32.68 
  -1   9  -2 1058.81   47.90 
  -1   9  -2 1029.64   48.48 
  -1   9  -2 1056.08   46.28 
  -1   9  -2 1085.39   46.88 
   1  -9   2 1081.00   48.84 
   1  -9   2 1039.61   46.75 
  -2   9  -2   56.37    6.80 
  -2   9  -2   70.26    5.22 
  -2   9  -2   71.94    5.89 
   2  -9   2   63.80    4.60 
   2  -9   2   57.65    5.13 
  -3   9  -2  295.34   15.91 
  -3   9  -2  306.52   16.77 
  -3   9  -2  323.04   15.04 
   3  -9   2  304.06   14.54 
   3  -9   2  306.98   15.08 
  -4   9  -2  406.56   20.41 
  -4   9  -2  404.76   20.82 
  -4   9  -2  399.75   18.95 
   4  -9   2  391.19   18.56 
   4  -9   2  388.10   19.00 
  -5   9  -2   26.96    3.87 
  -5   9  -2   23.79    5.10 
  -5   9  -2   18.33    4.90 
   5  -9   2   24.49    3.87 
   5  -9   2   19.01    3.41 
  -6   9  -2   64.13    6.24 
  -6   9  -2   53.57    7.44 
  -6   9  -2   67.88    8.60 
   6  -9   2   61.10    5.02 
   6  -9   2   69.99    5.54 
  -7   9  -2  163.72    9.96 
  -7   9  -2  144.51   10.52 
  -7   9  -2  162.90   11.77 
   7  -9   2  151.91    9.52 
   7  -9   2  153.66    9.26 
   9   8  -2   16.84    4.57 
   9   8  -2    9.61    4.25 
  -9  -8   2    8.49    5.45 
   8   8  -2  189.49   11.42 
   8   8  -2  189.95   11.88 
  -8  -8   2  200.43   13.92 
   7   8  -2  323.89   17.28 
   7   8  -2  319.78   15.98 
  -7  -8   2  318.83   18.44 
   6   8  -2  422.58   19.66 
   6   8  -2  389.98   20.04 
  -6  -8   2  405.23   21.67 
   5   8  -2  585.38   27.85 
   5   8  -2  573.00   27.26 
  -5  -8   2  619.33   29.43 
   4   8  -2 1215.85   51.32 
   4   8  -2 1073.03   50.15 
   4   8  -2 1238.00   52.12 
  -4  -8   2 1046.77   52.91 
  -4  -8   2 1229.43   50.48 
   3   8  -2  912.05   37.13 
   3   8  -2  847.72   38.18 
   3   8  -2  848.86   38.91 
  -3  -8   2  818.10   39.91 
  -3  -8   2  841.23   37.52 
   2   8  -2 1357.35   58.47 
   2   8  -2 1356.10   60.75 
   2   8  -2 1333.80   60.14 
   2   8  -2 1397.13   59.38 
  -2  -8   2 1279.50   60.86 
  -2  -8   2 1384.96   58.91 
   1   8  -2  641.29   29.11 
   1   8  -2  638.82   28.16 
   1   8  -2  610.04   27.39 
   1   8  -2  613.20   29.57 
   0   8  -2  629.90   29.52 
   0   8  -2  627.69   27.95 
   0   8  -2  660.73   28.63 
   0   8  -2  635.55   30.03 
   0  -8   2  624.74   30.24 
   0  -8   2  632.15   28.36 
  -1   8  -2  417.71   20.03 
  -1   8  -2  473.42   21.56 
  -1   8  -2  452.20   20.62 
  -1   8  -2  435.62   22.07 
   1  -8   2  457.61   20.45 
   1  -8   2  460.88   22.32 
  -2   8  -2  234.43   13.64 
  -2   8  -2  263.70   12.28 
  -2   8  -2  250.41   11.72 
  -2   8  -2  248.39   13.31 
   2  -8   2  243.39   12.16 
   2  -8   2  249.64   13.70 
  -3   8  -2   70.55    6.84 
  -3   8  -2   92.35    5.64 
  -3   8  -2   77.85    6.01 
   3  -8   2   82.18    5.00 
   3  -8   2   71.04    4.97 
  -4   8  -2   40.26    4.74 
  -4   8  -2   43.40    5.95 
  -4   8  -2   45.69    4.59 
   4  -8   2   44.07    4.62 
   4  -8   2   45.53    4.24 
  -5   8  -2  144.46    7.94 
  -5   8  -2  156.30    9.80 
  -5   8  -2  135.52   10.14 
   5  -8   2  138.15    7.95 
   5  -8   2  136.36    7.97 
  -6   8  -2  489.63   24.79 
  -6   8  -2  551.55   24.90 
  -6   8  -2  457.32   23.23 
   6  -8   2  494.33   23.09 
   6  -8   2  500.76   23.37 
  -7   8  -2  445.01   20.17 
  -7   8  -2  402.38   21.70 
  -7   8  -2  406.66   21.01 
   7  -8   2  410.95   20.01 
   7  -8   2  399.99   19.52 
  -8   8  -2  248.67   13.95 
  -8   8  -2  264.76   15.88 
  -8   8  -2  258.30   15.60 
   8  -8   2  261.19   13.82 
   8  -8   2  259.96   13.53 
   9   7  -2  376.80   18.65 
   9   7  -2  352.01   19.63 
  -9  -7   2  360.81   20.74 
   8   7  -2  172.61   11.70 
   8   7  -2  188.70   10.90 
  -8  -7   2  182.70   12.62 
   7   7  -2  500.97   25.95 
   7   7  -2  536.35   25.28 
  -7  -7   2  573.02   27.42 
   6   7  -2  316.94   16.57 
   6   7  -2  299.24   15.84 
  -6  -7   2  369.91   18.51 
   5   7  -2  987.43   44.64 
   5   7  -2  992.21   43.99 
   5   7  -2 1083.59   42.94 
  -5  -7   2  880.73   45.43 
   4   7  -2   89.14    6.93 
   4   7  -2   93.62    6.26 
   4   7  -2  108.68    4.90 
   4   7  -2  104.30    6.52 
  -4  -7   2   94.06    4.93 
  -4  -7   2   95.98    7.99 
   3   7  -2 1045.59   45.48 
   3   7  -2  987.70   43.36 
   3   7  -2 1019.88   44.33 
   3   7  -2 1025.00   44.86 
  -3  -7   2 1017.93   43.67 
  -3  -7   2  996.25   43.60 
  -3  -7   2  917.51   45.67 
   2   7  -2 1251.98   53.67 
   2   7  -2 1223.54   52.48 
   2   7  -2 1162.26   52.98 
   2   7  -2 1097.09   51.61 
  -2  -7   2 1176.22   51.91 
  -2  -7   2 1255.53   54.05 
   1   7  -2  116.01    6.05 
   1   7  -2  127.72    8.17 
   1   7  -2  130.88    7.47 
   1   7  -2  127.40    6.74 
  -1  -7   2  134.47    8.12 
   0   7  -2  241.58   11.00 
   0   7  -2  256.45   11.54 
   0   7  -2  237.35   12.82 
   0   7  -2  250.35   12.51 
   0  -7   2  226.64   12.96 
   0  -7   2  229.79   11.28 
  -1   7  -2  544.99   26.21 
  -1   7  -2  551.49   24.54 
  -1   7  -2  530.75   24.88 
  -1   7  -2  549.48   25.68 
   1  -7   2  560.56   24.83 
   1  -7   2  591.73   26.50 
  -2   7  -2  354.67   17.75 
  -2   7  -2  375.31   18.23 
  -2   7  -2  325.76   18.11 
  -2   7  -2  385.47   16.58 
  -2   7  -2  365.89   16.91 
   2  -7   2  379.37   16.88 
   2  -7   2  361.98   18.14 
  -3   7  -2  378.86   16.53 
  -3   7  -2  356.45   16.28 
  -3   7  -2  322.17   17.64 
  -3   7  -2  383.60   17.61 
   3  -7   2  337.21   17.65 
   3  -7   2  355.76   16.44 
  -4   7  -2 1279.32   55.69 
  -4   7  -2 1253.17   54.73 
  -4   7  -2 1209.36   55.83 
   4  -7   2 1254.19   54.47 
   4  -7   2 1227.54   54.66 
  -5   7  -2  298.91   15.85 
  -5   7  -2  317.33   15.79 
  -5   7  -2  291.75   14.63 
   5  -7   2  306.88   14.45 
   5  -7   2  293.40   14.65 
  -6   7  -2  555.13   27.30 
  -6   7  -2  581.89   27.55 
  -6   7  -2  543.82   26.10 
   6  -7   2  595.26   26.16 
   6  -7   2  578.37   26.32 
  -7   7  -2  331.35   17.85 
  -7   7  -2  335.79   17.68 
  -7   7  -2  339.19   16.20 
   7  -7   2  327.14   16.39 
   7  -7   2  325.41   15.97 
  -8   7  -2  585.70   29.19 
  -8   7  -2  565.22   27.60 
   8  -7   2  606.71   27.76 
   8  -7   2  632.09   27.75 
  -9   7  -2  153.01   11.35 
  -9   7  -2  157.16   10.06 
  -9   7  -2  140.56   11.41 
   9  -7   2  155.32    9.79 
   9  -7   2  159.85    9.22 
  10   6  -2   90.92    8.52 
  10   6  -2  120.00    8.91 
 -10  -6   2  105.83   10.14 
   9   6  -2  629.78   32.40 
   9   6  -2  681.79   31.75 
  -9  -6   2  734.80   34.04 
   8   6  -2  443.60   20.98 
   8   6  -2  381.49   21.48 
  -8  -6   2  460.92   22.66 
   7   6  -2  417.06   20.52 
   7   6  -2  411.38   19.79 
  -7  -6   2  404.51   21.43 
   6   6  -2  620.46   26.13 
   6   6  -2  569.51   27.09 
   6   6  -2  567.41   27.47 
  -6  -6   2  596.94   28.57 
   5   6  -2  469.46   20.60 
   5   6  -2  460.19   22.08 
   5   6  -2  492.12   21.67 
  -5  -6   2  440.62   22.80 
   4   6  -2  537.89   24.55 
   4   6  -2  540.53   22.79 
   4   6  -2  544.09   23.66 
   4   6  -2  518.84   24.13 
  -4  -6   2  529.83   22.97 
  -4  -6   2  511.04   22.55 
  -4  -6   2  527.63   24.83 
  -4  -6   2  455.58   22.45 
  -4  -6   2  517.33   25.01 
   3   6  -2  138.24    7.77 
   3   6  -2  134.47    7.38 
   3   6  -2  138.35    6.51 
   3   6  -2  145.77    6.65 
   3   6  -2  143.01    8.50 
  -3  -6   2  138.58    6.67 
  -3  -6   2  143.14    6.81 
  -3  -6   2  134.98    8.63 
  -3  -6   2  167.08    9.31 
   2   6  -2   26.34    3.91 
   2   6  -2   27.77    3.03 
   2   6  -2   30.32    2.06 
   2   6  -2   24.22    3.12 
  -2  -6   2   33.63    2.27 
  -2  -6   2   24.64    2.21 
  -2  -6   2   30.71    3.79 
  -2  -6   2   35.07    3.67 
   1   6  -2  834.98   37.50 
   1   6  -2  826.31   37.03 
   1   6  -2  861.08   35.94 
   1   6  -2  855.34   36.56 
  -1  -6   2  800.22   37.63 
  -1  -6   2  780.07   36.08 
   0   6  -2  214.33   11.14 
   0   6  -2  231.68   11.64 
   0   6  -2  228.27   10.79 
   0   6  -2  217.09   10.18 
   0  -6   2  233.39   10.47 
   0  -6   2  216.42   11.87 
  -1   6  -2  120.02    7.25 
  -1   6  -2  104.31    7.20 
  -1   6  -2  118.47    5.66 
  -1   6  -2  104.57    6.45 
  -1   6  -2  108.71    6.10 
   1  -6   2  124.18    7.36 
   1  -6   2  105.01    5.87 
  -2   6  -2 1375.75   55.18 
  -2   6  -2 1136.89   53.87 
  -2   6  -2 1350.70   53.76 
  -2   6  -2 1219.98   54.60 
  -2   6  -2 1232.14   55.12 
   2  -6   2 1081.82   54.74 
   2  -6   2 1242.56   53.90 
  -3   6  -2 1119.90   53.36 
  -3   6  -2 1258.72   53.53 
  -3   6  -2 1278.05   52.45 
  -3   6  -2 1239.09   53.14 
  -3   6  -2 1237.68   52.22 
   3  -6   2 1156.91   52.31 
   3  -6   2 1090.12   53.15 
  -4   6  -2  780.10   32.92 
  -4   6  -2  721.31   33.61 
  -4   6  -2  725.09   33.82 
  -4   6  -2  785.79   34.11 
   4  -6   2  704.39   33.57 
   4  -6   2  728.03   32.72 
   4  -6   2  727.03   32.84 
  -5   6  -2 3403.71  143.46 
  -5   6  -2 3376.94  144.41 
  -5   6  -2 3088.07  144.08 
   5  -6   2 3376.80  143.30 
   5  -6   2 3315.48  143.40 
  -6   6  -2  632.92   29.53 
  -6   6  -2  614.33   29.46 
  -6   6  -2  599.11   28.53 
   6  -6   2  634.25   28.45 
   6  -6   2  664.38   28.54 
  -7   6  -2  470.94   21.95 
  -7   6  -2  462.52   23.12 
  -7   6  -2  474.28   22.98 
   7  -6   2  481.32   22.09 
   7  -6   2  471.78   21.81 
  -8   6  -2  490.27   22.84 
  -8   6  -2  485.82   24.05 
  -8   6  -2  460.60   24.17 
   8  -6   2  497.37   22.74 
   8  -6   2  497.95   22.80 
  -9   6  -2   79.56    7.00 
  -9   6  -2   76.74    7.76 
  -9   6  -2   70.13    7.03 
   9  -6   2   76.25    6.58 
   9  -6   2   76.82    6.90 
  10   5  -2  293.93   17.19 
  10   5  -2  306.24   16.15 
 -10  -5   2  298.60   17.98 
   9   5  -2  370.52   18.93 
   9   5  -2  365.47   19.79 
  -9  -5   2  396.24   20.87 
   8   5  -2  401.48   18.57 
   8   5  -2  407.50   19.65 
   8   5  -2  384.03   20.31 
  -8  -5   2  418.38   21.18 
   7   5  -2  571.18   26.52 
   7   5  -2  581.93   25.62 
   7   5  -2  565.25   26.95 
  -7  -5   2  573.94   28.05 
   6   5  -2  453.26   22.16 
   6   5  -2  484.46   20.86 
   6   5  -2  459.04   21.53 
  -6  -5   2  460.16   22.97 
   5   5  -2  356.16   17.58 
   5   5  -2  362.60   16.37 
   5   5  -2  368.09   17.62 
   5   5  -2  363.96   17.18 
  -5  -5   2  364.60   18.23 
  -5  -5   2  367.25   18.41 
   4   5  -2  488.08   22.70 
   4   5  -2  470.06   22.01 
   4   5  -2  457.70   22.39 
   4   5  -2  465.12   21.38 
  -4  -5   2  528.40   23.43 
  -4  -5   2  499.81   23.09 
   3   5  -2  186.33    9.59 
   3   5  -2  184.05    9.82 
   3   5  -2  204.11   10.43 
   3   5  -2  208.28    9.01 
  -3  -5   2  182.44    8.72 
  -3  -5   2  198.86   10.62 
  -3  -5   2  204.76    9.09 
  -3  -5   2  201.92   10.88 
  -3  -5   2  203.43    8.82 
   2   5  -2 1465.36   65.66 
   2   5  -2 1516.86   64.38 
   2   5  -2 1479.57   64.31 
   2   5  -2 1436.63   65.17 
   2   5  -2 1480.62   64.95 
  -2  -5   2 1610.06   66.16 
  -2  -5   2 1414.73   65.74 
  -2  -5   2 1532.73   64.57 
  -2  -5   2 1481.19   64.38 
   1   5  -2   91.86    5.03 
   1   5  -2   91.90    5.39 
   1   5  -2   87.34    4.24 
   1   5  -2   83.15    5.67 
  -1  -5   2   80.20    5.75 
  -1  -5   2   93.56    6.07 
  -1  -5   2   87.67    4.37 
  -1  -5   2   80.84    4.33 
   0   5  -2 2645.99  113.62 
   0   5  -2 2477.73  114.40 
   0   5  -2 2742.25  114.43 
   0   5  -2 2606.48  113.21 
   0   5  -2 2535.73  113.97 
   0  -5   2 2817.90  114.61 
   0  -5   2 2566.74  113.32 
  -1   5  -2 1633.04   73.32 
  -1   5  -2 1722.82   72.30 
  -1   5  -2 1630.99   72.54 
  -1   5  -2 1566.65   72.96 
   1  -5   2 1619.18   72.39 
   1  -5   2 1855.35   73.63 
  -2   5  -2 2290.82  101.65 
  -2   5  -2 2459.92  101.02 
  -2   5  -2 2445.33  102.04 
  -2   5  -2 2172.48  101.14 
   2  -5   2 2342.57  101.98 
   2  -5   2 2317.40  101.11 
  -3   5  -2  957.39   41.50 
  -3   5  -2  902.48   42.41 
  -3   5  -2  997.61   42.23 
  -3   5  -2  950.81   41.62 
  -3   5  -2  905.92   42.34 
   3  -5   2  906.67   41.57 
   3  -5   2 1021.19   42.40 
  -4   5  -2  767.43   34.31 
  -4   5  -2  733.27   34.09 
  -4   5  -2  825.03   33.51 
  -4   5  -2  706.23   33.49 
   4  -5   2  751.09   33.97 
   4  -5   2  758.60   33.49 
  -5   5  -2  925.98   41.61 
  -5   5  -2 1056.08   42.54 
  -5   5  -2  825.10   42.11 
  -5   5  -2  904.43   42.39 
   5  -5   2  956.35   41.60 
   5  -5   2  984.02   41.59 
  -6   5  -2  238.43   11.56 
  -6   5  -2  236.14   12.49 
  -6   5  -2  234.12   12.26 
   6  -5   2  233.98   11.69 
   6  -5   2  233.18   11.61 
  -7   5  -2  858.52   39.41 
  -7   5  -2  901.15   38.75 
  -7   5  -2  769.13   39.41 
   7  -5   2  884.48   38.62 
   7  -5   2  909.25   38.62 
  -8   5  -2  123.76    7.25 
  -8   5  -2  119.19    8.35 
  -8   5  -2  113.68    8.76 
   8  -5   2  112.09    7.58 
   8  -5   2  128.90    7.58 
  -9   5  -2  266.28   15.38 
  -9   5  -2  284.42   15.43 
  -9   5  -2  287.73   14.81 
   9  -5   2  301.04   14.40 
   9  -5   2  293.19   14.53 
 -10   5  -2   61.50    8.11 
 -10   5  -2   69.69    7.67 
 -10   5  -2   72.67    6.01 
  10  -5   2   71.59    6.87 
  10  -5   2   73.43    6.45 
  10   4  -2  364.55   18.11 
  10   4  -2  357.57   19.45 
 -10  -4   2  357.52   20.11 
   9   4  -2   70.66    7.41 
   9   4  -2   59.07    4.71 
   9   4  -2   63.00    6.45 
  -9  -4   2   55.53    7.88 
   8   4  -2  219.00   10.85 
   8   4  -2  196.67   12.52 
   8   4  -2  216.37   11.92 
  -8  -4   2  252.00   13.88 
   7   4  -2  396.54   18.78 
   7   4  -2  394.18   19.37 
   7   4  -2  397.59   18.00 
  -7  -4   2  386.64   20.21 
   6   4  -2  350.90   15.81 
   6   4  -2  334.12   16.95 
   6   4  -2  341.34   16.51 
  -6  -4   2  356.74   17.78 
   5   4  -2  470.69   21.40 
   5   4  -2  453.57   20.76 
   5   4  -2  477.08   21.70 
   5   4  -2  439.14   21.57 
  -5  -4   2  490.68   22.31 
   4   4  -2 2108.95   94.16 
   4   4  -2 2060.47   93.40 
   4   4  -2 2082.59   93.88 
   4   4  -2 2188.39   94.41 
  -4  -4   2 2325.63   94.86 
  -4  -4   2 2212.02   94.99 
   3   4  -2 2716.07  112.42 
   3   4  -2 2580.05  112.55 
   3   4  -2 2615.24  111.90 
   3   4  -2 2555.44  112.93 
  -3  -4   2 2426.63  111.75 
  -3  -4   2 2445.76  111.82 
  -3  -4   2 2695.01  113.16 
  -3  -4   2 2743.72  111.93 
   2   4  -2 2450.03  109.60 
   2   4  -2 2595.87  110.72 
   2   4  -2 2492.94  110.21 
   2   4  -2 2456.80  110.04 
  -2  -4   2 2671.37  110.96 
  -2  -4   2 2652.18  110.83 
  -2  -4   2 2431.40  109.45 
  -2  -4   2 2680.10  109.87 
  -2  -4   2 2478.86  109.72 
   1   4  -2 3083.70  133.46 
   1   4  -2 2814.28  134.51 
   1   4  -2 3039.41  134.04 
   1   4  -2 3302.72  133.52 
   1   4  -2 3174.56  133.91 
  -1  -4   2 3091.27  133.58 
  -1  -4   2 3070.71  133.49 
  -1  -4   2 3243.67  134.64 
   0   4  -2 1116.63   50.49 
   0   4  -2 1246.22   50.71 
   0   4  -2 1130.21   49.55 
   0   4  -2 1114.60   49.88 
   0   4  -2 1096.67   49.73 
   0   4  -2 1095.65   50.12 
   0  -4   2 1181.16   49.60 
   0  -4   2 1117.33   49.59 
   0  -4   2 1207.43   50.61 
  -1   4  -2 1605.10   69.14 
  -1   4  -2 1551.38   69.82 
  -1   4  -2 1639.69   69.79 
  -1   4  -2 1550.08   69.42 
  -1   4  -2 1665.15   68.93 
   1  -4   2 1550.65   69.79 
   1  -4   2 1599.22   68.97 
  -2   4  -2 2547.01  112.80 
  -2   4  -2 2523.74  113.44 
  -2   4  -2 2658.82  112.67 
  -2   4  -2 2639.86  113.16 
  -2   4  -2 2668.93  113.41 
   2  -4   2 2635.99  112.75 
  -3   4  -2 1662.39   70.29 
  -3   4  -2 1531.83   69.46 
  -3   4  -2 1558.54   69.92 
  -3   4  -2 1636.77   69.59 
  -3   4  -2 1605.77   70.14 
   3  -4   2 1603.17   69.99 
   3  -4   2 1623.27   69.56 
  -4   4  -2  540.28   22.80 
  -4   4  -2  478.96   22.78 
  -4   4  -2  487.93   23.28 
  -4   4  -2  546.47   23.55 
  -4   4  -2  532.30   23.47 
   4  -4   2  475.94   22.94 
   4  -4   2  514.44   22.86 
  -5   4  -2  649.37   29.55 
  -5   4  -2  607.86   29.04 
  -5   4  -2  679.97   29.72 
  -5   4  -2  674.08   29.67 
   5  -4   2  641.06   29.00 
   5  -4   2  663.43   29.03 
  -6   4  -2  304.14   13.67 
  -6   4  -2  281.80   14.06 
  -6   4  -2  280.18   14.03 
  -6   4  -2  279.59   14.08 
   6  -4   2  277.57   13.33 
   6  -4   2  280.46   13.48 
  -7   4  -2   16.75    2.50 
  -7   4  -2   15.47    3.08 
  -7   4  -2   17.36    3.75 
   7  -4   2   20.88    2.89 
   7  -4   2   13.73    2.78 
  -8   4  -2  322.93   16.71 
  -8   4  -2  323.65   16.25 
   8  -4   2  345.24   16.01 
   8  -4   2  351.86   16.14 
  -9   4  -2  362.52   19.39 
  -9   4  -2  366.53   18.32 
  -9   4  -2  385.57   18.86 
   9  -4   2  384.32   18.02 
   9  -4   2  380.27   18.05 
 -10   4  -2  442.99   24.18 
 -10   4  -2  480.55   23.69 
  10  -4   2  508.88   23.05 
  10  -4   2  491.37   22.76 
  10   3  -2   20.37    3.85 
  10   3  -2   33.97    5.51 
  10   3  -2   25.44    3.57 
 -10  -3   2   21.99    5.54 
   9   3  -2  200.03   10.60 
   9   3  -2  208.31   11.72 
   9   3  -2  213.98   12.11 
  -9  -3   2  213.19   13.24 
   8   3  -2  154.98    8.49 
   8   3  -2  155.15    8.82 
   8   3  -2  144.70    9.99 
  -8  -3   2  178.87   11.02 
   7   3  -2  762.60   34.98 
   7   3  -2  783.58   34.29 
   7   3  -2  756.84   33.77 
  -7  -3   2  750.19   35.54 
   6   3  -2  234.60   10.83 
   6   3  -2  222.92   11.90 
   6   3  -2  219.31   11.37 
  -6  -3   2  224.96   12.47 
  -6  -3   2  234.36   12.38 
   5   3  -2 1569.62   69.65 
   5   3  -2 1597.39   69.27 
   5   3  -2 1541.90   69.51 
   5   3  -2 1666.73   68.89 
  -5  -3   2 1412.29   70.11 
  -5  -3   2 1744.30   70.33 
   4   3  -2 1194.15   51.68 
   4   3  -2 1169.73   52.05 
   4   3  -2 1171.52   51.92 
   4   3  -2 1193.10   51.28 
  -4  -3   2 1176.79   52.60 
   3   3  -2 1295.69   57.99 
   3   3  -2 1313.96   57.50 
   3   3  -2 1335.75   57.85 
   3   3  -2 1362.42   58.36 
  -3  -3   2 1180.48   58.52 
  -3  -3   2 1477.18   58.64 
  -3  -3   2 1331.39   57.48 
   2   3  -2 3364.09  142.29 
   2   3  -2 3346.63  141.87 
   2   3  -2 3284.15  141.46 
   2   3  -2 3342.84  141.79 
  -2  -3   2 3018.42  141.55 
  -2  -3   2 3086.43  142.41 
  -2  -3   2 3430.25  141.52 
  -2  -3   2 3288.82  142.34 
  -2  -3   2 3421.40  141.93 
   1   3  -2 4216.45  185.44 
   1   3  -2 4307.78  185.40 
   1   3  -2 4137.37  184.85 
  -1  -3   2 4576.14  185.28 
  -1  -3   2 4522.85  184.88 
  -1  -3   2 4226.55  185.37 
  -1  -3   2 4364.84  185.41 
  -1  -3   2 3997.21  185.38 
   0   3  -2 5309.85  244.77 
   0   3  -2 5201.88  243.60 
   0   3  -2 6027.11  246.85 
   0   3  -2 5665.42  242.83 
   0   3  -2 5496.55  243.47 
   0  -3   2 5778.28  243.59 
   0  -3   2 6041.94  246.24 
   0  -3   2 5755.92  243.98 
   0  -3   2 5927.88  244.10 
   0  -3   2 5211.92  245.27 
  -1   3  -2 3107.21  145.76 
  -1   3  -2 3197.41  145.63 
  -1   3  -2 3531.54  146.14 
  -1   3  -2 3508.66  145.55 
  -1   3  -2 3439.61  145.50 
   1  -3   2 3508.34  146.16 
   1  -3   2 3315.86  145.75 
   1  -3   2 3275.41  145.50 
   1  -3   2 3668.20  146.19 
   1  -3   2 3257.04  145.50 
  -2   3  -2  431.63   17.72 
  -2   3  -2  393.00   18.19 
  -2   3  -2  393.78   17.96 
  -2   3  -2  399.42   17.78 
  -2   3  -2  398.13   18.22 
   2  -3   2  411.02   17.92 
   2  -3   2  386.02   17.67 
   2  -3   2  384.72   18.10 
  -3   3  -2  314.93   14.44 
  -3   3  -2  295.99   14.76 
  -3   3  -2  351.02   14.50 
  -3   3  -2  290.98   14.69 
   3  -3   2  321.14   14.43 
   3  -3   2  350.11   14.68 
  -4   3  -2  366.21   17.99 
  -4   3  -2  397.27   17.71 
  -4   3  -2  409.08   18.15 
  -4   3  -2  414.09   18.08 
  -4   3  -2  373.02   17.67 
   4  -3   2  405.52   17.74 
  -5   3  -2  754.55   35.31 
  -5   3  -2  792.10   35.16 
  -5   3  -2  774.54   34.89 
  -5   3  -2  783.17   35.18 
   5  -3   2  826.35   34.90 
   5  -3   2  820.43   34.92 
  -6   3  -2  430.25   20.47 
  -6   3  -2  459.96   20.82 
  -6   3  -2  410.13   21.10 
  -6   3  -2  482.42   20.91 
   6  -3   2  451.88   20.53 
   6  -3   2  469.83   20.53 
  -7   3  -2  780.49   35.23 
  -7   3  -2  724.84   35.60 
  -7   3  -2  755.70   35.18 
  -7   3  -2  817.09   34.99 
   7  -3   2  821.10   34.90 
   7  -3   2  809.22   34.84 
  -8   3  -2  273.08   15.17 
  -8   3  -2  312.78   14.99 
  -8   3  -2  303.68   14.76 
   8  -3   2  313.63   14.53 
   8  -3   2  300.13   14.41 
  -9   3  -2  351.92   17.20 
  -9   3  -2  329.28   16.11 
  -9   3  -2  316.35   16.48 
   9  -3   2  343.13   16.05 
   9  -3   2  332.06   15.99 
 -10   3  -2  461.40   22.86 
 -10   3  -2  452.35   23.37 
  10  -3   2  513.99   22.90 
  10  -3   2  468.93   22.26 
  10  -3   2  475.78   22.42 
  10   2  -2  476.31   24.29 
  10   2  -2  499.26   23.08 
  10   2  -2  456.40   22.33 
 -10  -2   2  488.80   24.93 
   9   2  -2  266.14   13.35 
   9   2  -2  269.26   14.68 
   9   2  -2  256.89   13.00 
  -9  -2   2  248.09   15.00 
   8   2  -2  276.14   13.56 
   8   2  -2  256.05   14.24 
   8   2  -2  263.78   12.81 
   7   2  -2 1268.91   55.71 
   7   2  -2 1271.44   56.11 
   7   2  -2 1284.07   56.74 
   6   2  -2  536.74   25.28 
   6   2  -2  592.37   26.35 
   6   2  -2  607.59   26.02 
   6   2  -2  624.22   25.29 
  -6  -2   2  566.15   27.27 
   5   2  -2 1209.20   53.99 
   5   2  -2 1238.27   54.30 
   5   2  -2 1267.09   53.39 
   5   2  -2 1304.62   54.56 
  -5  -2   2 1186.23   55.08 
   4   2  -2 3067.54  126.35 
   4   2  -2 2636.69  126.83 
   4   2  -2 2926.42  126.89 
   4   2  -2 3097.73  126.65 
   3   2  -2  937.65   41.43 
   3   2  -2  934.61   41.20 
   3   2  -2  949.21   41.88 
   3   2  -2  943.47   41.62 
  -3  -2   2  916.76   42.02 
  -3  -2   2 1000.60   42.35 
  -3  -2   2  957.71   41.39 
   2   2  -2   53.82    3.08 
   2   2  -2   56.08    2.93 
   2   2  -2   49.84    3.06 
   2   2  -2   57.11    3.10 
   2   2  -2   49.15    3.52 
  -2  -2   2   58.56    2.92 
  -2  -2   2   54.84    3.94 
  -2  -2   2   48.52    3.60 
  -2  -2   2   53.44    2.39 
  -2  -2   2   56.34    2.42 
   1   2  -2  149.16    7.38 
   1   2  -2  155.41    6.75 
   1   2  -2  137.40    6.87 
   1   2  -2  141.05    7.34 
   1   2  -2  145.82    6.89 
  -1  -2   2  149.49    6.79 
  -1  -2   2  139.46    6.48 
  -1  -2   2  149.83    6.85 
  -1  -2   2  130.35    7.29 
  -1  -2   2  170.20    7.63 
  -1  -2   2  151.46    6.92 
   0   2  -2  750.64   33.75 
   0   2  -2  800.63   33.94 
   0   2  -2  748.17   34.28 
   0   2  -2  717.67   34.27 
   0  -2   2  813.01   33.86 
   0  -2   2  800.85   34.32 
   0  -2   2  832.31   33.95 
   0  -2   2  775.43   33.78 
   0  -2   2  776.15   33.72 
  -1   2  -2  108.05    4.94 
  -1   2  -2  106.46    5.04 
  -1   2  -2   92.82    5.29 
  -1   2  -2   95.43    5.01 
  -1   2  -2  110.36    5.40 
   1  -2   2  111.84    5.37 
   1  -2   2   98.57    4.85 
   1  -2   2  101.97    4.99 
   1  -2   2  111.02    4.94 
   1  -2   2  104.14    5.31 
   1  -2   2  103.02    4.92 
   1  -2   2  110.41    4.99 
  -2   2  -2 1577.47   66.11 
  -2   2  -2 1439.99   66.10 
  -2   2  -2 1429.03   66.34 
  -2   2  -2 1563.53   66.39 
   2  -2   2 1565.45   66.21 
   2  -2   2 1476.01   66.25 
   2  -2   2 1633.55   66.19 
   2  -2   2 1460.34   66.09 
   2  -2   2 1538.83   66.13 
   2  -2   2 1622.58   66.16 
  -3   2  -2 2465.16  109.06 
  -3   2  -2 2582.98  108.93 
  -3   2  -2 2461.43  109.10 
  -3   2  -2 2684.65  108.94 
  -3   2  -2 2243.30  108.98 
   3  -2   2 2638.07  108.94 
   3  -2   2 2611.87  109.78 
  -4   2  -2 1992.05   88.25 
  -4   2  -2 2069.93   88.19 
  -4   2  -2 1994.46   88.50 
  -4   2  -2 1988.70   88.20 
   4  -2   2 2156.25   88.21 
  -5   2  -2  379.44   18.28 
  -5   2  -2  429.97   18.79 
  -5   2  -2  406.01   18.30 
  -5   2  -2  411.98   18.36 
   5  -2   2  410.09   18.30 
   5  -2   2  408.49   18.29 
  -6   2  -2  665.30   32.54 
  -6   2  -2  786.26   32.69 
  -6   2  -2  656.43   32.96 
  -6   2  -2  766.31   32.64 
   6  -2   2  767.18   32.56 
   6  -2   2  781.45   32.61 
  -7   2  -2  854.88   38.10 
  -7   2  -2  850.54   38.13 
  -7   2  -2  853.96   38.79 
  -7   2  -2  867.73   38.15 
   7  -2   2  859.08   37.98 
   7  -2   2  872.79   37.98 
  -8   2  -2  751.70   34.14 
  -8   2  -2  739.67   33.34 
  -8   2  -2  727.65   33.29 
  -8   2  -2  742.78   33.25 
   8  -2   2  734.99   33.18 
   8  -2   2  758.05   33.10 
  -9   2  -2  940.00   41.66 
  -9   2  -2  878.53   42.27 
   9  -2   2  935.81   41.23 
   9  -2   2  955.38   41.44 
   9  -2   2  930.43   41.64 
 -10   2  -2  136.37    8.60 
 -10   2  -2  126.79    9.62 
  10  -2   2  137.00    8.34 
  10  -2   2  140.37    8.84 
  10  -2   2  130.00    7.81 
 -11   2  -2   80.63    7.21 
 -11   2  -2   91.91    8.64 
  11  -2   2   77.65    7.40 
  11  -2   2   75.57    6.76 
  10   1  -2  300.22   15.60 
  10   1  -2  337.18   16.56 
   9   1  -2  850.65   41.02 
   9   1  -2  852.25   40.65 
  -9  -1   2  919.62   42.19 
  -9  -1   2 1030.30   43.16 
   8   1  -2 1069.27   46.80 
   8   1  -2 1093.37   47.18 
  -8  -1   2 1097.97   47.98 
  -8  -1   2  986.43   48.41 
   7   1  -2  760.56   35.09 
   7   1  -2  773.41   34.19 
   7   1  -2  747.27   34.80 
  -7  -1   2  773.21   36.42 
  -7  -1   2  888.07   36.16 
   6   1  -2 1251.35   53.81 
   6   1  -2 1248.85   53.52 
   6   1  -2 1228.62   52.98 
  -6  -1   2 1116.34   54.66 
  -6  -1   2 1211.82   54.36 
  -6  -1   2 1299.19   55.01 
   5   1  -2  396.67   17.54 
   5   1  -2  400.94   16.77 
   5   1  -2  348.94   16.76 
   5   1  -2  404.21   17.28 
  -5  -1   2  403.03   18.54 
  -5  -1   2  344.42   17.88 
   4   1  -2  222.43   10.29 
   4   1  -2  211.28    9.70 
   4   1  -2  210.79    9.25 
   4   1  -2  203.95    9.91 
  -4  -1   2  208.67    9.25 
  -4  -1   2  212.54   10.81 
  -4  -1   2  210.09   10.19 
  -4  -1   2  194.41   10.54 
   3   1  -2  172.37    8.16 
   3   1  -2  188.23    8.03 
   3   1  -2  186.25    7.61 
   3   1  -2  149.28    8.44 
  -3  -1   2  177.28    8.81 
  -3  -1   2  168.58    9.04 
  -3  -1   2  181.30    7.60 
  -3  -1   2  150.82    8.34 
   2   1  -2 1218.99   51.53 
   2   1  -2 1112.13   51.03 
   2   1  -2 1235.78   51.32 
   2   1  -2 1211.47   52.01 
   2   1  -2 1172.38   51.40 
   2   1  -2 1044.73   51.77 
  -2  -1   2 1251.79   51.34 
  -2  -1   2 1164.00   51.94 
  -2  -1   2 1214.79   51.54 
  -2  -1   2 1215.13   51.21 
  -2  -1   2 1079.90   51.99 
  -2  -1   2 1322.37   51.71 
   1   1  -2   91.02    4.48 
   1   1  -2   95.11    4.27 
   1   1  -2   85.38    4.50 
   1   1  -2   91.16    4.62 
   1   1  -2  101.70    5.12 
   1   1  -2   91.33    5.06 
  -1  -1   2   93.19    5.08 
  -1  -1   2  101.92    4.65 
  -1  -1   2   96.47    4.56 
  -1  -1   2  101.44    4.30 
   0   1  -2  840.47   36.65 
   0   1  -2  808.40   36.78 
   0   1  -2  825.82   36.73 
   0   1  -2  817.05   37.15 
   0   1  -2  815.70   36.65 
   0   1  -2  924.46   37.24 
   0  -1   2  887.95   36.67 
   0  -1   2  898.25   36.81 
   0  -1   2  835.14   37.14 
   0  -1   2  850.07   36.75 
   0  -1   2  833.31   36.62 
  -1   1  -2  480.24   21.54 
  -1   1  -2  512.46   21.46 
  -1   1  -2  534.54   21.88 
  -1   1  -2  455.10   21.50 
  -1   1  -2  470.36   21.75 
  -1   1  -2  455.72   21.52 
   1  -1   2  486.89   21.51 
   1  -1   2  511.36   21.45 
   1  -1   2  510.65   21.54 
   1  -1   2  451.47   21.70 
   1  -1   2  517.85   21.54 
   1  -1   2  542.98   21.84 
  -2   1  -2  406.76   17.68 
  -2   1  -2  376.96   17.69 
  -2   1  -2  401.06   17.71 
  -2   1  -2  393.76   17.72 
  -2   1  -2  392.83   17.65 
   2  -1   2  406.47   17.70 
   2  -1   2  434.14   17.61 
   2  -1   2  400.60   17.53 
   2  -1   2  415.43   17.68 
  -3   1  -2  459.82   21.00 
  -3   1  -2  474.54   21.18 
  -3   1  -2  472.74   20.88 
  -3   1  -2  464.78   21.00 
   3  -1   2  487.09   21.05 
   3  -1   2  513.66   21.20 
  -4   1  -2 1454.90   58.47 
  -4   1  -2 1347.41   58.42 
  -4   1  -2 1238.29   58.19 
  -4   1  -2 1350.14   58.71 
  -4   1  -2 1235.65   58.18 
   4  -1   2 1473.75   58.46 
  -5   1  -2 1982.55   79.32 
  -5   1  -2 1797.38   78.62 
  -5   1  -2 1771.38   78.81 
  -5   1  -2 1668.63   78.55 
   5  -1   2 1834.53   78.76 
   5  -1   2 1875.27   78.79 
  -6   1  -2  709.45   31.42 
  -6   1  -2  634.96   31.16 
  -6   1  -2  744.27   31.20 
  -6   1  -2  730.38   31.91 
   6  -1   2  731.78   31.29 
   6  -1   2  713.23   31.32 
  -7   1  -2  814.28   35.47 
  -7   1  -2  774.95   34.65 
  -7   1  -2  760.06   34.54 
  -7   1  -2  763.54   34.72 
   7  -1   2  811.28   34.61 
   7  -1   2  782.97   34.66 
  -8   1  -2  338.37   17.02 
  -8   1  -2  340.06   16.26 
  -8   1  -2  350.99   16.37 
   8  -1   2  350.48   16.17 
   8  -1   2  362.02   16.60 
   8  -1   2  350.15   16.13 
  -9   1  -2  238.16   13.31 
  -9   1  -2  227.19   14.16 
  -9   1  -2  243.41   12.26 
   9  -1   2  252.66   11.87 
   9  -1   2  251.80   12.17 
   9  -1   2  239.80   12.43 
 -10   1  -2  303.96   17.02 
 -10   1  -2  329.65   16.07 
  10  -1   2  319.97   15.80 
  10  -1   2  335.46   15.75 
  10  -1   2  312.90   15.30 
 -11   1  -2  258.49   13.75 
 -11   1  -2  258.96   14.98 
  11  -1   2  248.10   13.18 
  11  -1   2  247.58   13.75 
  10   0  -2  415.24   20.44 
  10   0  -2  413.42   19.82 
 -10   0   2  408.38   21.07 
 -10   0   2  412.00   22.22 
   9   0  -2  186.88   10.16 
   9   0  -2  185.13   10.03 
  -9   0   2  191.06   11.13 
  -9   0   2  177.12   11.98 
   8   0  -2  862.72   39.61 
   8   0  -2  860.61   39.27 
  -8   0   2  906.18   40.42 
  -8   0   2  904.00   41.01 
   7   0  -2  411.67   18.91 
   7   0  -2  411.27   18.30 
   7   0  -2  410.60   19.22 
  -7   0   2  401.91   19.94 
  -7   0   2  417.16   20.41 
   6   0  -2  565.75   25.89 
   6   0  -2  544.11   26.08 
   6   0  -2  547.75   25.43 
  -6   0   2  652.32   27.53 
  -6   0   2  592.89   26.80 
  -6   0   2  580.97   27.12 
   5   0  -2  240.79   11.90 
   5   0  -2  249.42   11.22 
   5   0  -2  252.00   11.83 
   5   0  -2  254.70   11.65 
  -5   0   2  234.45   12.28 
  -5   0   2  259.93   11.26 
  -5   0   2  251.36   12.74 
  -5   0   2  251.71   12.78 
   4   0  -2  524.09   23.93 
   4   0  -2  557.47   23.14 
   4   0  -2  529.74   23.56 
   4   0  -2  536.78   23.41 
  -4   0   2  561.52   24.53 
  -4   0   2  538.37   23.16 
  -4   0   2  513.41   24.26 
  -4   0   2  475.39   23.79 
   3   0  -2  638.40   29.34 
   3   0  -2  670.74   29.05 
   3   0  -2  665.28   29.27 
   3   0  -2  732.23   30.03 
  -3   0   2  649.38   30.01 
  -3   0   2  667.26   29.66 
  -3   0   2  657.66   30.15 
  -3   0   2  678.23   29.08 
   2   0  -2   56.01    2.77 
   2   0  -2   57.35    3.63 
   2   0  -2   56.07    2.95 
   2   0  -2   57.84    3.67 
   2   0  -2   55.92    3.07 
   2   0  -2   59.17    3.18 
  -2   0   2   59.54    3.78 
  -2   0   2   62.62    3.96 
  -2   0   2   54.05    3.26 
  -2   0   2   59.33    3.05 
  -2   0   2   59.50    3.04 
  -2   0   2   53.52    2.77 
   1   0  -2  825.34   35.64 
   1   0  -2  798.51   35.59 
   1   0  -2  818.60   35.51 
   1   0  -2  788.07   36.12 
   1   0  -2  871.93   35.70 
  -1   0   2  827.71   35.67 
  -1   0   2  834.20   36.16 
  -1   0   2  836.88   35.61 
  -1   0   2  842.04   35.52 
  -1   0   2  833.75   35.64 
  -1   0   2  765.73   36.18 
   0   0  -2 3367.49  157.20 
   0   0  -2 3716.69  157.51 
   0   0  -2 3341.52  157.41 
   0   0   2 3806.93  157.97 
   0   0   2 4025.82  160.01 
   0   0   2 3636.00  156.81 
  -1   0  -2 1438.35   61.04 
  -1   0  -2 1340.26   60.94 
  -1   0  -2 1364.12   61.16 
  -1   0  -2 1543.69   61.03 
   1   0   2 1330.68   61.10 
   1   0   2 1260.97   60.89 
   1   0   2 1499.20   61.87 
   1   0   2 1576.63   61.04 
   1   0   2 1339.84   60.87 
   1   0   2 1459.15   60.96 
  -2   0  -2  771.71   35.82 
  -2   0  -2  890.82   35.87 
  -2   0  -2  781.01   35.89 
  -2   0  -2  829.94   35.98 
  -2   0  -2  811.90   35.69 
   2   0   2  858.83   35.85 
   2   0   2  880.46   35.94 
   2   0   2  832.35   35.79 
   2   0   2  797.74   35.85 
  -3   0  -2 6038.04  262.56 
  -3   0  -2 6216.72  262.66 
  -3   0  -2 5532.15  263.15 
   3   0   2 6432.90  261.87 
   3   0   2 6176.09  263.25 
  -4   0  -2   49.84    3.26 
  -4   0  -2   53.77    2.95 
  -4   0  -2   49.05    2.94 
  -4   0  -2   49.20    2.92 
  -5   0  -2  569.74   26.72 
  -5   0  -2  645.39   27.69 
  -5   0  -2  617.79   27.25 
   5   0   2  616.37   27.16 
   5   0   2  651.54   27.17 
  -6   0  -2 1170.28   48.86 
  -6   0  -2 1052.33   49.65 
  -6   0  -2 1115.01   49.21 
   6   0   2 1146.39   49.08 
   6   0   2 1145.56   49.12 
  -7   0  -2  280.00   13.99 
  -7   0  -2  275.28   13.10 
  -7   0  -2  276.64   12.98 
   7   0   2  294.92   13.13 
   7   0   2  287.74   13.16 
   7   0   2  282.05   13.26 
  -8   0  -2  206.63    9.98 
  -8   0  -2  177.47    9.05 
  -8   0  -2  165.46    8.95 
   8   0   2  168.73    8.73 
   8   0   2  180.67    8.89 
   8   0   2  174.74    9.29 
  -9   0  -2  116.27    7.06 
  -9   0  -2  122.09    7.69 
  -9   0  -2  118.00    6.99 
   9   0   2  121.08    6.90 
   9   0   2  107.32    7.24 
   9   0   2  114.89    6.63 
 -10   0  -2   90.34    6.56 
 -10   0  -2   76.83    7.51 
  10   0   2   83.75    6.67 
  10   0   2   87.97    6.13 
 -11   0  -2  150.72    9.79 
 -11   0  -2  149.30   10.91 
  11   0   2  170.65    9.36 
  11   0   2  170.76    9.48 
  10  -1  -2   62.73    5.80 
  10  -1  -2   68.17    6.26 
 -10   1   2   56.77    6.73 
 -10   1   2   69.65    8.73 
   9  -1  -2  465.29   21.74 
   9  -1  -2  472.56   21.36 
  -9   1   2  422.82   22.25 
  -9   1   2  448.27   23.08 
   8  -1  -2   33.50    4.20 
   8  -1  -2   29.85    3.08 
   8  -1  -2   26.11    3.77 
  -8   1   2   24.78    5.59 
  -8   1   2   20.84    4.51 
   7  -1  -2   67.48    5.05 
   7  -1  -2   71.32    4.79 
   7  -1  -2   75.77    4.33 
  -7   1   2   61.48    6.11 
  -7   1   2   68.00    6.40 
   6  -1  -2  204.86   10.09 
   6  -1  -2  204.20    9.46 
   6  -1  -2  198.70    9.91 
  -6   1   2  200.51   11.29 
  -6   1   2  185.83   10.42 
  -6   1   2  208.33   11.20 
   5  -1  -2  414.53   18.89 
   5  -1  -2  424.23   18.88 
   5  -1  -2  414.88   18.55 
  -5   1   2  435.95   19.62 
  -5   1   2  381.82   19.86 
  -5   1   2  439.54   19.92 
   4  -1  -2  228.06   10.32 
   4  -1  -2  193.13   10.73 
   4  -1  -2  226.08   10.06 
   4  -1  -2  217.49   10.25 
  -4   1   2  234.48   11.38 
  -4   1   2  229.09   11.19 
  -4   1   2  219.61   10.86 
   3  -1  -2 2058.40   87.07 
   3  -1  -2 1914.48   87.19 
   3  -1  -2 2032.16   87.94 
   3  -1  -2 2051.01   87.22 
  -3   1   2 1889.84   88.02 
  -3   1   2 2142.21   87.64 
  -3   1   2 1967.27   87.08 
  -3   1   2 2101.05   87.92 
   2  -1  -2 2098.51   88.88 
   2  -1  -2 2034.33   89.14 
   2  -1  -2 2136.14   88.91 
   2  -1  -2 2147.42   88.82 
   2  -1  -2 2277.87   88.94 
   2  -1  -2 1889.52   89.55 
   2  -1  -2 2211.84   89.85 
  -2   1   2 1902.75   89.58 
  -2   1   2 2127.32   88.84 
  -2   1   2 1816.66   89.06 
  -2   1   2 2035.29   89.45 
   1  -1  -2 3725.83  162.72 
   1  -1  -2 4025.68  165.13 
   1  -1  -2 4044.93  163.22 
   1  -1  -2 3818.55  164.94 
   1  -1  -2 3731.87  162.67 
   1  -1  -2 3468.39  162.63 
  -1   1   2 3615.30  162.00 
  -1   1   2 3632.22  163.82 
  -1   1   2 3866.58  162.28 
   0  -1  -2 5523.69  248.38 
   0  -1  -2 5874.17  248.50 
   0  -1  -2 5386.62  248.43 
   0  -1  -2 5917.05  247.82 
   0  -1  -2 6178.98  250.89 
   0   1   2 6004.36  250.73 
   0   1   2 5044.42  247.32 
   0   1   2 5649.17  248.99 
   0   1   2 5793.55  248.61 
   0   1   2 6167.15  247.81 
  -1  -1  -2 1254.85   55.65 
  -1  -1  -2 1352.47   55.84 
  -1  -1  -2 1256.73   55.79 
  -1  -1  -2 1355.94   55.55 
   1   1   2 1233.29   55.76 
   1   1   2 1408.59   55.68 
   1   1   2 1219.90   55.77 
   1   1   2 1329.43   55.56 
   1   1   2 1248.06   55.63 
   1   1   2 1231.42   55.52 
  -2  -1  -2 2100.27   97.72 
  -2  -1  -2 2546.45   98.14 
   2   1   2 2190.14   97.75 
   2   1   2 2268.36   97.72 
   2   1   2 2309.96   97.93 
   2   1   2 2208.97   97.60 
  -3  -1  -2  334.53   14.15 
   3   1   2  299.87   14.24 
   3   1   2  339.69   14.02 
   3   1   2  295.15   14.11 
   3   1   2  323.10   14.01 
  -4  -1  -2 2109.14   96.44 
  -4  -1  -2 2197.59   96.15 
   4   1   2 2397.81   96.31 
   4   1   2 2216.22   96.13 
  -5  -1  -2  173.79    8.04 
  -5  -1  -2  150.34    6.95 
   5   1   2  147.51    7.46 
   5   1   2  160.11    7.33 
  -6  -1  -2   25.17    3.28 
  -6  -1  -2   22.70    2.07 
  -6  -1  -2   27.86    1.93 
   6   1   2   23.60    2.27 
   6   1   2   26.20    2.41 
   6   1   2   23.80    2.66 
  -7  -1  -2  592.10   25.54 
  -7  -1  -2  576.55   25.60 
  -7  -1  -2  535.46   26.32 
   7   1   2  586.05   25.55 
   7   1   2  571.90   25.80 
   7   1   2  584.25   25.46 
  -8  -1  -2  899.74   40.67 
  -8  -1  -2  859.09   39.80 
  -8  -1  -2  901.78   39.89 
   8   1   2  940.49   39.56 
   8   1   2  909.13   39.66 
   8   1   2  896.15   39.97 
  -9  -1  -2   88.02    6.03 
  -9  -1  -2   90.29    6.15 
  -9  -1  -2   90.82    7.19 
   9   1   2   97.01    5.55 
   9   1   2  105.84    6.49 
   9   1   2   91.34    5.72 
  10   1   2  387.48   18.77 
  10   1   2  386.85   18.18 
  11   1   2  140.21   10.52 
  11   1   2  141.79    9.23 
  11   1   2  141.44    8.33 
  10  -2  -2   91.09    7.32 
  10  -2  -2   85.78    6.75 
 -10   2   2   89.25    9.22 
 -10   2   2   90.83    9.20 
   9  -2  -2  145.26    9.05 
   9  -2  -2  160.55    8.94 
  -9   2   2  155.77   10.95 
  -9   2   2  145.52    9.80 
   8  -2  -2  145.82    7.48 
   8  -2  -2  137.16    8.11 
   8  -2  -2  130.69    7.82 
  -8   2   2  140.08    9.71 
  -8   2   2  128.63    9.30 
   7  -2  -2  190.30    9.74 
   7  -2  -2  201.98    9.34 
   7  -2  -2  194.12    9.87 
  -7   2   2  186.61   11.22 
  -7   2   2  172.96   10.81 
   6  -2  -2  263.08   12.12 
   6  -2  -2  256.90   12.42 
   6  -2  -2  274.20   12.55 
  -6   2   2  289.65   13.58 
  -6   2   2  253.62   13.60 
  -6   2   2  235.05   13.57 
   5  -2  -2  532.84   24.47 
   5  -2  -2  540.17   23.71 
   5  -2  -2  535.25   23.93 
   5  -2  -2  553.28   23.94 
  -5   2   2  511.57   24.59 
  -5   2   2  535.15   24.83 
  -5   2   2  533.92   25.15 
   4  -2  -2  890.67   38.97 
   4  -2  -2  885.75   38.84 
   4  -2  -2  861.27   38.96 
  -4   2   2  871.02   39.76 
  -4   2   2  934.61   39.62 
  -4   2   2  901.52   40.09 
   3  -2  -2 1296.01   54.48 
   3  -2  -2 1307.67   54.55 
   3  -2  -2 1131.35   55.27 
  -3   2   2 1292.17   54.53 
  -3   2   2 1189.59   55.18 
  -3   2   2 1282.29   55.52 
  -3   2   2 1300.03   54.97 
   2  -2  -2 1765.02   75.99 
   2  -2  -2 1710.27   75.98 
  -2   2   2 1813.83   76.87 
  -2   2   2 1727.75   76.62 
  -2   2   2 1820.70   76.04 
  -2   2   2 1750.40   75.96 
  -2   2   2 1731.58   76.28 
   1  -2  -2 5142.22  236.25 
   1  -2  -2 5912.57  237.61 
   1  -2  -2 5014.56  236.84 
   1  -2  -2 6073.57  237.73 
   1  -2  -2 5541.53  238.98 
  -1   2   2 5176.23  236.95 
  -1   2   2 5655.06  240.08 
  -1   2   2 5586.66  237.55 
  -1   2   2 5555.44  237.03 
  -1   2   2 5294.49  237.81 
   0  -2  -2  420.51   18.54 
   0  -2  -2  430.83   18.29 
   0  -2  -2  377.21   18.74 
   0  -2  -2  404.86   18.36 
   0  -2  -2  422.12   18.15 
   0   2   2  412.67   18.14 
   0   2   2  441.30   18.39 
   0   2   2  459.34   18.52 
   0   2   2  428.71   18.27 
   0   2   2  436.55   18.84 
   0   2   2  377.09   18.81 
  -1  -2  -2 1792.90   81.52 
  -1  -2  -2 1912.27   81.95 
  -1  -2  -2 1668.29   81.91 
  -1  -2  -2 1944.93   81.69 
  -1  -2  -2 1980.56   81.78 
  -1  -2  -2 1864.86   81.62 
   1   2   2 1988.62   81.68 
   1   2   2 1940.20   81.50 
   1   2   2 2026.53   81.51 
   1   2   2 1910.78   81.97 
   1   2   2 1883.31   81.91 
   1   2   2 1818.31   81.71 
  -2  -2  -2  246.64   11.30 
  -2  -2  -2  254.11   10.86 
  -2  -2  -2  255.11   11.26 
  -2  -2  -2  227.00   11.11 
  -2  -2  -2  264.30   11.20 
   2   2   2  257.02   11.12 
   2   2   2  237.44   10.86 
   2   2   2  257.74   10.81 
   2   2   2  241.47   11.16 
   2   2   2  242.23   11.13 
   2   2   2  252.49   10.84 
   2   2   2  245.39   11.19 
  -3  -2  -2  481.13   21.67 
  -3  -2  -2  453.66   21.45 
  -3  -2  -2  478.62   21.73 
   3   2   2  496.43   21.88 
   3   2   2  553.47   21.94 
   3   2   2  511.96   21.53 
   3   2   2  504.01   21.72 
   3   2   2  483.55   21.54 
  -4  -2  -2 1564.89   67.62 
  -4  -2  -2 1522.90   67.55 
  -4  -2  -2 1440.07   67.61 
   4   2   2 1589.15   67.77 
   4   2   2 1661.22   67.64 
   4   2   2 1635.32   68.02 
   4   2   2 1544.32   67.49 
  -5  -2  -2  265.66   12.41 
  -5  -2  -2  287.10   12.53 
  -5  -2  -2  259.24   12.48 
   5   2   2  285.98   12.61 
   5   2   2  277.04   12.37 
   5   2   2  295.38   13.15 
  -6  -2  -2 1709.40   75.24 
  -6  -2  -2 1517.19   75.28 
   6   2   2 1831.94   76.02 
   6   2   2 1827.28   75.48 
   6   2   2 1821.90   75.20 
  -7  -2  -2  230.22   10.89 
   7   2   2  227.01   11.46 
   7   2   2  224.19   10.53 
   7   2   2  223.84   10.97 
   7   2   2  225.44   10.52 
  -8  -2  -2  305.01   13.48 
  -8  -2  -2  276.39   13.50 
   8   2   2  276.13   13.39 
   8   2   2  279.89   13.13 
   8   2   2  279.01   14.38 
   8   2   2  264.61   12.90 
  -9  -2  -2  403.87   18.83 
  -9  -2  -2  381.80   18.78 
   9   2   2  398.62   18.37 
   9   2   2  412.09   19.58 
   9   2   2  401.09   18.88 
   9   2   2  399.54   18.08 
 -10  -2  -2  622.59   28.61 
  10   2   2  619.07   29.44 
  10   2   2  634.63   28.71 
  10   2   2  612.62   28.08 
 -11  -2  -2  265.90   14.27 
  11   2   2  277.30   14.50 
  11   2   2  287.51   13.88 
  11   2   2  275.15   15.78 
  10  -3  -2   48.22    6.28 
  10  -3  -2   46.11    5.43 
 -10   3   2   56.33    8.29 
 -10   3   2   54.31    6.67 
   9  -3  -2  246.38   12.43 
   9  -3  -2  235.21   12.58 
  -9   3   2  226.87   14.29 
  -9   3   2  232.72   14.02 
   8  -3  -2  195.37   10.68 
   8  -3  -2  183.20    9.77 
   8  -3  -2  198.49   10.54 
  -8   3   2  208.90   11.95 
  -8   3   2  190.99   12.01 
   7  -3  -2  600.09   27.75 
   7  -3  -2  638.69   27.73 
   7  -3  -2  601.46   27.32 
  -7   3   2  585.15   28.64 
  -7   3   2  624.17   29.03 
   6  -3  -2 1600.14   69.54 
   6  -3  -2 1617.45   69.31 
   6  -3  -2 1629.79   69.51 
  -6   3   2 1463.09   70.17 
  -6   3   2 1646.81   70.71 
   5  -3  -2  803.57   35.21 
   5  -3  -2  826.84   35.11 
  -5   3   2  811.58   36.26 
  -5   3   2  803.33   36.49 
  -5   3   2  734.98   35.80 
   4  -3  -2 3036.68  129.01 
   4  -3  -2 3043.31  129.05 
   4  -3  -2 2991.12  130.06 
  -4   3   2 3002.69  130.20 
  -4   3   2 2733.59  128.98 
  -4   3   2 3068.22  129.99 
  -4   3   2 3045.80  129.66 
   3  -3  -2  453.08   21.90 
   3  -3  -2  485.21   20.94 
   3  -3  -2  480.05   20.97 
  -3   3   2  486.61   20.95 
  -3   3   2  411.23   21.26 
  -3   3   2  511.79   21.92 
   2  -3  -2 2795.77  129.62 
   2  -3  -2 2967.37  128.86 
   2  -3  -2 2959.76  128.80 
  -2   3   2 2910.94  128.75 
  -2   3   2 3069.16  129.61 
  -2   3   2 3236.97  129.27 
   1  -3  -2  460.02   21.10 
   1  -3  -2  452.45   20.33 
   1  -3  -2  492.50   21.02 
   1  -3  -2  478.23   20.17 
   1  -3  -2  473.49   20.23 
  -1   3   2  415.70   20.11 
  -1   3   2  426.74   20.85 
  -1   3   2  496.00   20.39 
  -1   3   2  456.85   20.59 
   0  -3  -2  639.05   30.11 
   0  -3  -2  688.00   30.67 
   0  -3  -2  693.26   30.37 
   0  -3  -2  665.76   30.88 
   0  -3  -2  699.22   31.02 
   0   3   2  744.36   31.08 
   0   3   2  763.29   30.13 
   0   3   2  662.07   30.83 
   0   3   2  698.59   30.36 
   0   3   2  728.34   30.60 
   0   3   2  678.05   30.16 
  -1  -3  -2 3412.49  153.01 
  -1  -3  -2 3492.12  152.57 
  -1  -3  -2 3691.32  153.06 
  -1  -3  -2 3669.04  152.86 
   1   3   2 3601.51  152.69 
   1   3   2 3458.05  152.81 
   1   3   2 3463.74  153.06 
   1   3   2 3365.44  152.75 
   1   3   2 3746.19  152.57 
  -2  -3  -2  783.85   38.26 
  -2  -3  -2  827.01   38.00 
  -2  -3  -2  811.71   37.64 
  -2  -3  -2  863.83   38.43 
  -2  -3  -2  952.25   38.29 
  -2  -3  -2  903.52   37.73 
   2   3   2  869.84   37.96 
   2   3   2  907.82   37.66 
   2   3   2  944.86   38.23 
   2   3   2  881.40   37.75 
  -3  -3  -2  385.63   16.69 
  -3  -3  -2  386.92   17.28 
  -3  -3  -2  393.10   17.21 
   3   3   2  377.15   16.88 
   3   3   2  362.12   16.55 
   3   3   2  359.41   16.93 
   3   3   2  403.41   16.79 
   3   3   2  388.53   17.17 
  -4  -3  -2  370.01   18.34 
  -4  -3  -2  377.72   18.14 
   4   3   2  427.84   18.17 
   4   3   2  406.83   17.85 
   4   3   2  401.00   18.14 
   4   3   2  436.15   18.67 
   4   3   2  449.71   17.90 
   4   3   2  415.29   18.07 
  -5  -3  -2  996.62   44.77 
  -5  -3  -2  991.80   44.72 
  -5  -3  -2  990.30   44.47 
   5   3   2 1028.93   45.09 
   5   3   2 1030.17   44.27 
   5   3   2 1027.24   44.59 
   5   3   2 1098.66   44.33 
  -6  -3  -2  406.97   20.27 
  -6  -3  -2  474.62   20.81 
  -6  -3  -2  479.37   20.75 
   6   3   2  463.70   21.25 
   6   3   2  454.37   20.22 
   6   3   2  477.20   20.65 
  -7  -3  -2 2723.61  120.68 
  -7  -3  -2 2541.35  120.53 
  -7  -3  -2 2765.19  120.15 
   7   3   2 2914.31  120.62 
   7   3   2 2887.19  121.27 
   7   3   2 2892.42  120.16 
  -8  -3  -2  333.93   16.92 
  -8  -3  -2  370.16   17.10 
   8   3   2  379.98   17.03 
   8   3   2  363.71   16.38 
   8   3   2  352.82   17.54 
   8   3   2  369.66   16.27 
  -9  -3  -2  470.92   22.00 
   9   3   2  460.31   21.89 
   9   3   2  477.04   21.30 
   9   3   2  472.98   22.63 
 -10  -3  -2  468.97   22.18 
  10   3   2  473.73   22.16 
  10   3   2  453.33   21.40 
  10   3   2  477.02   23.25 
 -11  -3  -2  332.23   16.31 
  11   3   2  311.04   16.24 
  11   3   2  302.73   17.45 
   9  -4  -2  305.43   15.45 
   9  -4  -2  312.33   15.38 
   9  -4  -2  291.14   14.93 
  -9   4   2  319.70   17.68 
  -9   4   2  307.00   16.66 
   8  -4  -2  960.81   41.60 
   8  -4  -2  895.91   41.18 
   8  -4  -2  963.92   41.69 
  -8   4   2  956.80   43.19 
  -8   4   2  849.77   42.55 
   7  -4  -2  923.55   41.51 
   7  -4  -2  918.15   41.36 
   7  -4  -2  932.71   41.61 
  -7   4   2  967.48   43.15 
  -7   4   2  927.60   42.71 
   6  -4  -2 1236.98   54.31 
   6  -4  -2 1167.38   54.14 
  -6   4   2 1226.60   55.29 
  -6   4   2 1343.72   55.79 
  -6   4   2 1206.00   54.27 
   5  -4  -2 1137.04   49.98 
   5  -4  -2 1141.63   49.93 
  -5   4   2 1222.92   50.94 
  -5   4   2 1129.07   49.99 
  -5   4   2 1173.13   51.25 
  -5   4   2 1040.76   51.17 
   4  -4  -2  881.49   38.44 
   4  -4  -2  887.32   38.43 
   4  -4  -2  866.42   39.55 
  -4   4   2  917.04   39.58 
  -4   4   2  907.32   39.12 
  -4   4   2  876.68   38.42 
  -4   4   2  784.36   39.48 
   3  -4  -2  451.34   22.45 
   3  -4  -2  477.93   21.42 
   3  -4  -2  460.18   21.37 
  -3   4   2  522.49   22.55 
  -3   4   2  479.13   21.94 
  -3   4   2  475.83   21.36 
  -3   4   2  494.04   22.64 
   2  -4  -2 1390.40   58.48 
   2  -4  -2 1389.79   58.60 
   2  -4  -2 1348.52   59.58 
  -2   4   2 1374.17   59.44 
  -2   4   2 1336.06   58.97 
  -2   4   2 1313.62   59.53 
  -2   4   2 1285.02   58.39 
   1  -4  -2  576.53   24.68 
   1  -4  -2  546.69   24.64 
   1  -4  -2  545.08   24.42 
   1  -4  -2  605.32   25.65 
  -1   4   2  517.02   24.90 
  -1   4   2  507.01   24.37 
  -1   4   2  558.07   25.40 
  -1   4   2  612.89   25.69 
   0  -4  -2  491.13   20.48 
   0  -4  -2  379.77   20.31 
   0  -4  -2  416.73   19.61 
   0  -4  -2  445.00   19.42 
   0   4   2  458.56   19.99 
   0   4   2  426.17   20.28 
   0   4   2  471.18   19.37 
   0   4   2  461.07   20.52 
   0   4   2  440.20   19.35 
  -1  -4  -2  875.78   42.32 
  -1  -4  -2  979.25   41.79 
  -1  -4  -2  965.43   41.46 
  -1  -4  -2  989.23   41.59 
  -1  -4  -2 1010.88   42.61 
   1   4   2  951.58   42.12 
   1   4   2  956.68   41.41 
   1   4   2  952.35   41.46 
  -2  -4  -2  335.20   17.18 
  -2  -4  -2  386.58   16.54 
  -2  -4  -2  373.42   16.29 
  -2  -4  -2  368.65   16.75 
  -2  -4  -2  384.92   17.46 
   2   4   2  373.29   16.45 
   2   4   2  403.00   17.29 
   2   4   2  372.93   16.22 
   2   4   2  384.94   17.08 
  -3  -4  -2 3179.39  136.88 
  -3  -4  -2 3321.00  136.80 
  -3  -4  -2 3235.07  136.05 
   3   4   2 3217.73  136.10 
   3   4   2 3031.79  136.33 
   3   4   2 3063.11  136.52 
   3   4   2 3194.08  135.89 
   3   4   2 3079.62  136.55 
   3   4   2 3130.09  135.85 
  -4  -4  -2 2427.80  104.52 
  -4  -4  -2 2444.21  104.59 
   4   4   2 2311.70  103.75 
   4   4   2 2423.45  104.06 
   4   4   2 2422.04  104.47 
   4   4   2 2394.75  103.97 
   4   4   2 2441.00  103.52 
  -5  -4  -2 1355.56   56.99 
  -5  -4  -2 1358.84   57.63 
   5   4   2 1330.39   57.66 
   5   4   2 1264.73   56.59 
   5   4   2 1256.23   57.04 
  -6  -4  -2 1793.80   82.93 
  -6  -4  -2 1717.65   82.90 
  -6  -4  -2 1871.86   82.31 
   6   4   2 2069.32   83.33 
   6   4   2 2005.70   82.66 
   6   4   2 1890.13   82.13 
   6   4   2 1993.56   82.12 
  -7  -4  -2  122.10    7.15 
  -7  -4  -2  123.61    6.16 
  -7  -4  -2  127.72    7.19 
   7   4   2  120.82    5.98 
   7   4   2  116.16    6.71 
   7   4   2  121.99    7.27 
  -8  -4  -2  588.65   28.06 
  -8  -4  -2  579.96   28.01 
   8   4   2  624.74   27.16 
   8   4   2  629.79   28.72 
   8   4   2  631.00   27.08 
   8   4   2  645.81   27.90 
  -9  -4  -2  548.00   25.29 
   9   4   2  524.02   24.24 
   9   4   2  554.55   25.04 
   9   4   2  544.79   25.77 
 -10  -4  -2   72.29    6.19 
  10   4   2   74.88    7.57 
  10   4   2   69.09    6.13 
 -11  -4  -2  364.28   19.14 
  11   4   2  401.86   19.22 
  11   4   2  404.62   20.57 
   9  -5  -2  563.62   26.77 
   9  -5  -2  566.54   26.71 
   9  -5  -2  540.18   26.24 
  -9   5   2  609.74   28.88 
  -9   5   2  544.48   27.76 
   8  -5  -2  472.93   21.97 
   8  -5  -2  459.25   22.34 
   8  -5  -2  478.81   22.12 
  -8   5   2  467.90   23.71 
  -8   5   2  472.17   24.15 
   7  -5  -2  191.17   10.13 
   7  -5  -2  186.24    9.81 
   7  -5  -2  177.20    9.76 
  -7   5   2  188.29   11.68 
  -7   5   2  182.98   10.89 
   6  -5  -2  390.64   18.69 
   6  -5  -2  416.37   18.83 
  -6   5   2  396.08   19.73 
  -6   5   2  404.02   20.36 
  -6   5   2  412.85   18.79 
   5  -5  -2  853.03   36.97 
   5  -5  -2  824.71   36.86 
  -5   5   2  851.69   38.34 
  -5   5   2  832.91   37.85 
  -5   5   2  800.50   36.84 
   4  -5  -2  475.23   21.47 
   4  -5  -2  480.69   21.56 
   4  -5  -2  439.11   22.73 
  -4   5   2  520.70   22.52 
  -4   5   2  451.40   22.90 
  -4   5   2  483.35   22.85 
  -4   5   2  496.48   21.57 
   3  -5  -2  323.97   15.43 
   3  -5  -2  364.79   16.90 
   3  -5  -2  326.39   15.59 
  -3   5   2  321.45   16.77 
  -3   5   2  334.18   16.10 
  -3   5   2  329.41   16.68 
  -3   5   2  372.19   15.50 
   2  -5  -2  342.49   15.94 
   2  -5  -2  349.70   16.18 
  -2   5   2  377.71   16.68 
  -2   5   2  342.86   17.27 
  -2   5   2  374.41   17.26 
  -2   5   2  342.77   15.91 
   1  -5  -2 1261.47   55.53 
   1  -5  -2 1287.09   55.28 
   1  -5  -2 1173.22   56.45 
  -1   5   2 1331.97   56.02 
  -1   5   2 1334.37   56.68 
  -1   5   2 1304.79   55.27 
  -1   5   2 1237.67   56.36 
   0  -5  -2  808.22   33.84 
   0  -5  -2  791.79   34.16 
   0  -5  -2  755.80   35.02 
   0  -5  -2  703.88   35.04 
   0  -5  -2  805.36   33.96 
   0   5   2  697.34   33.79 
   0   5   2  787.45   33.81 
   0   5   2  779.98   35.79 
   0   5   2  835.15   35.09 
   0   5   2  823.80   34.68 
  -1  -5  -2 2332.32   97.42 
  -1  -5  -2 2211.43   98.34 
  -1  -5  -2 2263.85   97.17 
  -1  -5  -2 2189.91   97.55 
  -1  -5  -2 2233.47   98.52 
   1   5   2 2378.26   97.26 
   1   5   2 2054.42   98.19 
   1   5   2 2313.56   97.12 
   1   5   2 2339.99   98.05 
  -2  -5  -2 2116.20   93.88 
  -2  -5  -2 2125.33   93.45 
  -2  -5  -2 1989.70   94.68 
  -2  -5  -2 2363.08   95.07 
  -2  -5  -2 2155.66   94.03 
  -2  -5  -2 2317.95   93.67 
   2   5   2 2142.50   93.73 
   2   5   2 2167.24   94.67 
   2   5   2 2199.76   94.47 
  -3  -5  -2 1356.65   63.99 
  -3  -5  -2 1487.72   64.00 
  -3  -5  -2 1460.50   63.03 
   3   5   2 1417.04   63.68 
   3   5   2 1533.20   63.02 
   3   5   2 1484.21   63.66 
  -4  -5  -2  891.00   36.91 
  -4  -5  -2  748.31   36.00 
  -4  -5  -2  845.39   36.88 
   4   5   2  820.17   36.37 
   4   5   2  812.70   36.51 
   4   5   2  811.70   35.94 
  -5  -5  -2 1565.66   75.86 
  -5  -5  -2 1804.96   76.02 
  -5  -5  -2 1678.29   75.12 
   5   5   2 1787.79   75.26 
   5   5   2 1780.97   75.90 
   5   5   2 1788.32   74.55 
  -6  -5  -2  891.95   42.11 
  -6  -5  -2 1025.10   43.30 
   6   5   2 1036.18   43.24 
   6   5   2 1005.13   41.78 
   6   5   2  996.70   42.52 
   6   5   2  857.22   41.73 
  -7  -5  -2  157.28    8.82 
  -7  -5  -2  153.23    8.66 
  -7  -5  -2  156.15    7.39 
   7   5   2  151.88    8.67 
   7   5   2  149.95    8.03 
   7   5   2  142.82    7.10 
  -8  -5  -2 1285.35   60.33 
   8   5   2 1408.82   59.90 
   8   5   2 1360.94   59.70 
   8   5   2 1397.83   60.77 
  -9  -5  -2   60.94    6.00 
   9   5   2   56.17    5.64 
   9   5   2   57.51    5.24 
 -10  -5  -2  338.56   16.47 
  10   5   2  284.85   16.86 
  10   5   2  303.63   15.91 
 -11  -5  -2   67.29    7.15 
  11   5   2   73.54    7.21 
  11   5   2   79.35    6.90 
   9  -6  -2  134.37    8.53 
   9  -6  -2  121.53    8.27 
   9  -6  -2  123.51    9.16 
  -9   6   2  136.74   11.51 
  -9   6   2  123.94    9.68 
   8  -6  -2  129.93    7.95 
   8  -6  -2  126.40    8.06 
   8  -6  -2  112.08    8.57 
  -8   6   2  135.65   11.06 
  -8   6   2  139.69   10.43 
   7  -6  -2  484.98   23.09 
   7  -6  -2  482.03   22.98 
  -7   6   2  506.47   24.34 
  -7   6   2  502.26   23.16 
  -7   6   2  498.13   24.95 
   6  -6  -2  125.16    7.02 
   6  -6  -2  112.00    6.93 
  -6   6   2  130.43    7.55 
  -6   6   2  128.59    8.21 
  -6   6   2  121.20    9.58 
   5  -6  -2   42.00    4.21 
   5  -6  -2   34.11    4.03 
  -5   6   2   37.46    5.34 
  -5   6   2   35.32    3.42 
  -5   6   2   41.18    5.77 
   4  -6  -2   89.10    5.12 
   4  -6  -2   90.76    5.70 
  -4   6   2   87.17    7.09 
  -4   6   2   91.07    6.70 
  -4   6   2   82.96    5.37 
   3  -6  -2  889.72   39.19 
   3  -6  -2  837.44   37.51 
   3  -6  -2  883.63   37.79 
  -3   6   2  792.30   38.83 
  -3   6   2  867.51   37.54 
  -3   6   2  835.23   39.13 
  -3   6   2  865.23   38.47 
   2  -6  -2  612.69   28.10 
   2  -6  -2  642.39   28.38 
   2  -6  -2  636.55   29.69 
  -2   6   2  668.92   28.16 
  -2   6   2  659.43   29.00 
  -2   6   2  601.11   29.62 
  -2   6   2  638.92   29.55 
   1  -6  -2  927.88   39.91 
   1  -6  -2  881.64   41.42 
   1  -6  -2  930.14   40.25 
  -1   6   2  918.57   39.92 
  -1   6   2  865.36   41.19 
  -1   6   2  971.33   40.85 
   0  -6  -2 1859.73   79.25 
   0  -6  -2 1805.31   77.55 
   0  -6  -2 1791.71   77.96 
   0   6   2 1747.11   78.89 
   0   6   2 1671.70   77.57 
   0   6   2 1907.12   78.56 
  -1  -6  -2 1034.66   48.80 
  -1  -6  -2 1067.14   47.86 
  -1  -6  -2 1108.96   47.38 
  -1  -6  -2 1076.08   47.40 
  -1  -6  -2 1008.14   48.95 
   1   6   2 1181.76   47.58 
   1   6   2 1197.27   48.98 
   1   6   2 1093.84   48.47 
  -2  -6  -2 1642.63   71.65 
  -2  -6  -2 1576.43   70.98 
  -2  -6  -2 1686.25   71.04 
  -2  -6  -2 1673.76   72.82 
  -2  -6  -2 1549.88   72.55 
  -2  -6  -2 1696.75   71.86 
   2   6   2 1745.98   72.27 
   2   6   2 1636.73   71.32 
  -3  -6  -2 2078.43   87.80 
  -3  -6  -2 2054.19   87.92 
   3   6   2 1925.96   87.41 
   3   6   2 2003.06   87.25 
   3   6   2 1949.52   86.47 
  -4  -6  -2  250.92   13.27 
  -4  -6  -2  252.29   12.93 
  -4  -6  -2  253.54   12.04 
   4   6   2  256.58   12.54 
   4   6   2  270.24   12.62 
   4   6   2  253.37   11.79 
  -5  -6  -2  524.00   24.10 
  -5  -6  -2  498.98   22.88 
  -5  -6  -2  505.52   23.90 
   5   6   2  499.36   23.57 
   5   6   2  505.11   23.43 
   5   6   2  537.20   22.97 
  -6  -6  -2  525.03   24.79 
  -6  -6  -2  527.12   24.76 
  -6  -6  -2  483.65   23.40 
   6   6   2  540.63   23.80 
   6   6   2  569.16   24.78 
  -7  -6  -2  119.43    5.92 
  -7  -6  -2  122.47    7.93 
   7   6   2  105.34    6.61 
   7   6   2  110.65    7.88 
  -8  -6  -2  142.04    8.94 
   8   6   2  132.55    7.85 
   8   6   2  132.26    9.10 
  -9  -6  -2  190.72   11.44 
   9   6   2  188.88   10.41 
   9   6   2  192.44   11.76 
 -10  -6  -2  239.16   13.62 
  10   6   2  231.40   12.61 
  10   6   2  231.18   14.04 
 -11  -6  -2  318.01   17.21 
  11   6   2  318.02   16.37 
  11   6   2  308.57   17.84 
   8  -7  -2   83.78    7.66 
   8  -7  -2   94.63    6.86 
   8  -7  -2  107.41    7.46 
  -8   7   2  101.81    9.82 
  -8   7   2   97.23    8.42 
   7  -7  -2   79.27    6.75 
   7  -7  -2   89.96    6.70 
  -7   7   2   91.93    9.58 
  -7   7   2   77.46    5.94 
  -7   7   2   91.97    7.52 
   6  -7  -2  254.02   12.59 
   6  -7  -2  242.16   12.44 
  -6   7   2  240.50   13.68 
  -6   7   2  266.10   14.95 
  -6   7   2  250.79   12.51 
   5  -7  -2  270.03   13.82 
   5  -7  -2  278.90   13.46 
  -5   7   2  289.11   15.68 
  -5   7   2  302.89   13.75 
  -5   7   2  252.14   14.80 
   4  -7  -2  694.74   30.50 
   4  -7  -2  720.39   30.87 
  -4   7   2  660.65   32.25 
  -4   7   2  658.06   30.44 
  -4   7   2  682.41   31.73 
   3  -7  -2  322.67   16.13 
   3  -7  -2  374.13   18.20 
   3  -7  -2  352.20   16.57 
  -3   7   2  352.31   16.21 
  -3   7   2  363.18   18.02 
  -3   7   2  338.97   17.35 
   2  -7  -2 1502.01   65.22 
   2  -7  -2 1550.31   65.63 
  -2   7   2 1450.55   65.23 
  -2   7   2 1436.73   66.75 
  -2   7   2 1566.32   66.32 
   1  -7  -2  754.63   34.10 
   1  -7  -2  678.72   32.07 
   1  -7  -2  729.57   32.57 
  -1   7   2  697.83   33.18 
  -1   7   2  782.80   32.21 
  -1   7   2  743.80   33.73 
   0  -7  -2  520.63   22.63 
   0  -7  -2  464.71   24.42 
   0  -7  -2  524.44   23.19 
   0   7   2  571.99   24.01 
   0   7   2  469.06   24.16 
   0   7   2  535.29   22.75 
  -1  -7  -2 1176.12   51.26 
  -1  -7  -2 1097.88   51.78 
  -1  -7  -2 1228.32   53.31 
  -1  -7  -2 1219.32   51.25 
   1   7   2 1150.71   51.43 
   1   7   2 1191.06   52.48 
   1   7   2 1227.56   52.98 
  -2  -7  -2  865.18   36.73 
  -2  -7  -2  946.39   39.12 
  -2  -7  -2  796.32   38.59 
  -2  -7  -2  816.92   37.42 
  -2  -7  -2  823.57   36.68 
   2   7   2  853.89   38.12 
   2   7   2  814.73   38.42 
   2   7   2  880.86   37.10 
  -3  -7  -2   53.43    5.02 
  -3  -7  -2   48.43    3.73 
  -3  -7  -2   51.49    5.37 
   3   7   2   56.66    3.34 
   3   7   2   53.96    4.70 
   3   7   2   58.06    5.01 
  -4  -7  -2  207.64    9.97 
  -4  -7  -2  203.72   11.21 
  -4  -7  -2  209.30   11.49 
   4   7   2  193.05   10.49 
   4   7   2  195.31   10.72 
   4   7   2  214.18    9.69 
  -5  -7  -2  295.46   14.71 
  -5  -7  -2  301.02   17.22 
  -5  -7  -2  319.25   16.22 
   5   7   2  336.46   15.82 
   5   7   2  332.75   14.73 
  -6  -7  -2   59.53    4.07 
  -6  -7  -2   69.20    5.99 
   6   7   2   54.72    4.57 
   6   7   2   63.24    5.18 
  -7  -7  -2  260.21   14.22 
   7   7   2  259.11   14.00 
   7   7   2  262.35   12.77 
  -8  -7  -2  194.53   11.44 
   8   7   2  191.01   11.50 
   8   7   2  173.78   10.16 
  -9  -7  -2  356.36   19.16 
   9   7   2  387.37   19.53 
   9   7   2  377.55   18.08 
 -10  -7  -2  205.10   13.15 
  10   7   2  218.64   11.82 
  10   7   2  215.92   13.49 
   7  -8  -2  373.68   18.21 
   7  -8  -2  362.35   18.07 
  -7   8   2  366.51   17.80 
  -7   8   2  349.10   19.31 
  -7   8   2  378.80   20.97 
   6  -8  -2  233.90   12.24 
   6  -8  -2  209.22   12.30 
  -6   8   2  250.73   14.22 
  -6   8   2  252.23   12.18 
  -6   8   2  245.57   14.86 
   5  -8  -2  310.79   15.43 
   5  -8  -2  326.29   15.79 
  -5   8   2  324.65   17.02 
  -5   8   2  310.90   15.42 
  -5   8   2  320.03   17.68 
   4  -8  -2  856.72   38.15 
   4  -8  -2  849.76   37.91 
  -4   8   2  889.44   37.91 
  -4   8   2  820.91   39.18 
  -4   8   2  840.93   39.92 
   3  -8  -2  758.17   32.56 
   3  -8  -2  695.10   31.97 
  -3   8   2  698.34   32.07 
  -3   8   2  756.81   33.53 
  -3   8   2  698.84   34.01 
   2  -8  -2  185.14    9.01 
   2  -8  -2  192.62   11.45 
   2  -8  -2  182.04    9.65 
  -2   8   2  169.98    9.02 
  -2   8   2  193.20   11.33 
  -2   8   2  165.56   10.42 
   1  -8  -2  822.53   37.89 
  -1   8   2  813.57   38.62 
  -1   8   2  926.78   39.54 
  -1   8   2  843.44   37.45 
   0  -8  -2  674.81   29.22 
   0  -8  -2  714.06   31.75 
   0  -8  -2  666.02   29.79 
   0   8   2  604.11   29.30 
   0   8   2  652.75   31.19 
   0   8   2  687.50   30.70 
  -1  -8  -2  452.84   20.86 
  -1  -8  -2  432.70   21.53 
  -1  -8  -2  534.63   23.63 
   1   8   2  502.90   21.19 
   1   8   2  454.95   22.23 
   1   8   2  467.75   22.90 
  -2  -8  -2  135.25    6.19 
  -2  -8  -2  142.83    9.20 
  -2  -8  -2  122.60    6.13 
  -2  -8  -2  136.78    7.05 
   2   8   2  132.16    8.53 
   2   8   2  140.38    8.35 
   2   8   2  141.10    6.81 
  -3  -8  -2  451.12   23.85 
  -3  -8  -2  478.59   23.87 
  -3  -8  -2  468.67   22.18 
   3   8   2  489.65   23.13 
   3   8   2  525.43   23.52 
   3   8   2  516.46   21.89 
  -4  -8  -2  333.45   15.79 
  -4  -8  -2  348.82   17.57 
   4   8   2  321.30   15.39 
   4   8   2  341.48   16.73 
  -5  -8  -2  132.16    7.18 
  -5  -8  -2  129.41    9.05 
   5   8   2  124.87    8.34 
   5   8   2  127.41    6.81 
  -6  -8  -2  395.93   19.96 
  -6  -8  -2  361.22   17.92 
   6   8   2  423.10   18.22 
   6   8   2  383.16   19.06 
  -7  -8  -2  228.48   12.79 
   7   8   2  209.05   11.02 
   7   8   2  199.83   12.27 
  -8  -8  -2  157.07   11.35 
   8   8   2  182.65   11.31 
   8   8   2  183.55    9.57 
  -9  -8  -2  388.31   20.12 
   9   8   2  368.05   18.32 
   9   8   2  374.05   19.46 
 -10  -8  -2  320.49   17.58 
  10   8   2  293.89   15.65 
  10   8   2  303.44   16.91 
   7  -9  -2  266.74   14.45 
   7  -9  -2  264.04   14.27 
  -7   9   2  258.22   16.93 
  -7   9   2  263.42   14.25 
  -7   9   2  301.67   16.68 
   6  -9  -2  331.79   16.78 
   6  -9  -2  343.97   17.18 
  -6   9   2  347.51   18.81 
  -6   9   2  344.83   16.88 
  -6   9   2  332.85   19.45 
   5  -9  -2  459.18   20.63 
   5  -9  -2  451.42   20.97 
  -5   9   2  408.13   22.32 
  -5   9   2  470.50   23.54 
  -5   9   2  411.03   20.50 
   4  -9  -2  280.92   13.77 
   4  -9  -2  284.02   14.00 
  -4   9   2  287.79   13.82 
  -4   9   2  251.29   15.25 
  -4   9   2  292.70   16.81 
   3  -9  -2  514.12   24.42 
   3  -9  -2  519.35   23.87 
  -3   9   2  526.64   23.96 
  -3   9   2  542.48   25.36 
  -3   9   2  526.69   26.29 
   2  -9  -2  298.54   14.18 
   2  -9  -2  314.94   14.96 
  -2   9   2  289.10   15.83 
  -2   9   2  291.57   16.56 
  -2   9   2  316.48   14.33 
   1  -9  -2  206.61   10.42 
   1  -9  -2  232.87   11.43 
   1  -9  -2  241.68   13.55 
  -1   9   2  214.94   10.74 
  -1   9   2  202.16   12.86 
  -1   9   2  230.88   12.03 
   0  -9  -2  369.89   19.06 
   0  -9  -2  366.66   16.13 
   0  -9  -2  347.77   16.90 
   0   9   2  339.06   18.40 
   0   9   2  354.91   17.60 
  -1  -9  -2  140.37   10.27 
  -1  -9  -2  147.00    8.31 
  -1  -9  -2  156.17    7.33 
   1   9   2  157.12   10.03 
   1   9   2  154.81    7.62 
   1   9   2  153.05    9.48 
  -2  -9  -2  149.57    7.15 
  -2  -9  -2  156.15   10.56 
  -2  -9  -2  159.90    8.39 
   2   9   2  145.31    9.80 
   2   9   2  160.53    9.11 
   2   9   2  160.05    7.70 
  -3  -9  -2  356.89   16.74 
  -3  -9  -2  359.76   18.69 
   3   9   2  353.85   16.17 
   3   9   2  338.40   17.68 
  -4  -9  -2  663.94   31.90 
  -4  -9  -2  658.78   29.91 
   4   9   2  658.00   29.53 
   4   9   2  675.53   30.86 
  -5  -9  -2  787.45   34.45 
  -5  -9  -2  744.33   36.28 
   5   9   2  788.82   34.13 
   5   9   2  747.71   35.27 
  -6  -9  -2  377.95   18.68 
  -6  -9  -2  400.54   21.01 
   6   9   2  410.71   18.63 
   6   9   2  421.87   20.24 
  -7  -9  -2  603.84   30.86 
   7   9   2  649.84   30.10 
   7   9   2  654.04   28.82 
  -8  -9  -2  670.59   33.17 
   8   9   2  670.77   30.98 
   8   9   2  704.90   32.39 
  -9  -9  -2  274.49   16.49 
   9   9   2  286.99   14.63 
   9   9   2  295.92   16.56 
   6 -10  -2  252.76   13.16 
   6 -10  -2  273.98   14.22 
  -6  10   2  261.04   13.61 
  -6  10   2  236.83   16.50 
  -6  10   2  259.19   15.12 
   5 -10  -2  191.22   11.21 
   5 -10  -2  186.79   10.13 
  -5  10   2  194.34   12.05 
  -5  10   2  190.43   13.67 
  -5  10   2  190.71   10.60 
   4 -10  -2   93.16    7.17 
   4 -10  -2   87.62    6.20 
  -4  10   2   80.26    9.20 
  -4  10   2   89.50    8.53 
  -4  10   2   78.50    6.16 
   3 -10  -2  477.18   21.80 
   3 -10  -2  451.47   22.20 
  -3  10   2  483.76   21.94 
  -3  10   2  486.57   23.76 
  -3  10   2  469.95   24.58 
   2 -10  -2   36.23    4.16 
   2 -10  -2   35.84    4.01 
  -2  10   2   34.12    6.86 
  -2  10   2   30.72    3.88 
  -2  10   2   29.36    5.14 
   1 -10  -2  261.98   13.58 
   1 -10  -2  264.17   12.63 
  -1  10   2  272.94   12.86 
  -1  10   2  279.81   15.59 
  -1  10   2  258.46   14.67 
   0 -10  -2  633.69   27.64 
   0 -10  -2  653.93   28.59 
   0 -10  -2  603.54   30.64 
   0  10   2  596.29   30.16 
   0  10   2  614.55   27.83 
   0  10   2  639.37   29.59 
  -1 -10  -2  186.33   10.38 
  -1 -10  -2  224.50   12.60 
  -1 -10  -2  192.18    9.24 
   1  10   2  203.44   11.16 
   1  10   2  193.53    9.59 
   1  10   2  173.62   11.96 
  -2 -10  -2 1071.04   48.29 
  -2 -10  -2 1034.50   45.91 
   2  10   2 1043.70   45.33 
   2  10   2  980.47   46.70 
  -3 -10  -2  216.86   13.55 
  -3 -10  -2  216.73   11.10 
   3  10   2  204.12   12.35 
   3  10   2  218.11   10.55 
  -4 -10  -2  743.33   32.78 
   4  10   2  623.85   29.51 
   4  10   2  623.98   30.99 
  -5 -10  -2  252.73   15.23 
  -5 -10  -2  253.07   12.79 
   5  10   2  250.68   12.35 
   5  10   2  254.23   13.80 
  -6 -10  -2  862.43   42.18 
   6  10   2  884.27   40.93 
   6  10   2  915.29   39.54 
  -7 -10  -2  563.18   28.34 
   7  10   2  560.65   25.69 
   7  10   2  551.33   27.35 
  -8 -10  -2  276.94   17.48 
   8  10   2  298.96   16.53 
  -9 -10  -2  343.11   19.12 
   9  10   2  303.10   18.27 
   5 -11  -2  182.31   10.75 
   5 -11  -2  166.13    9.69 
  -5  11   2  145.43   12.88 
  -5  11   2  161.39   12.22 
  -5  11   2  156.88    9.68 
   4 -11  -2  187.91   10.25 
   4 -11  -2  201.71   11.31 
  -4  11   2  174.08   10.26 
  -4  11   2  174.14   13.56 
  -4  11   2  195.94   12.87 
   3 -11  -2  395.24   19.47 
   3 -11  -2  417.00   20.36 
  -3  11   2  436.89   22.99 
  -3  11   2  426.62   19.71 
  -3  11   2  407.33   21.68 
   2 -11  -2  495.64   22.96 
   2 -11  -2  510.96   23.71 
  -2  11   2  505.86   26.12 
  -2  11   2  504.43   23.19 
  -2  11   2  501.32   24.81 
   1 -11  -2  417.87   19.17 
   1 -11  -2  415.05   20.15 
  -1  11   2  409.35   21.31 
  -1  11   2  414.12   19.31 
  -1  11   2  426.43   22.37 
   0 -11  -2  287.01   14.40 
   0 -11  -2  254.74   13.49 
   0  11   2  288.67   15.65 
   0  11   2  300.25   18.03 
   0  11   2  282.19   13.47 
  -1 -11  -2  454.84   21.14 
  -1 -11  -2  430.55   23.59 
   1  11   2  455.08   22.28 
   1  11   2  438.15   20.30 
  -2 -11  -2  273.11   16.91 
  -2 -11  -2  298.73   14.39 
   2  11   2  302.73   15.31 
   2  11   2  267.48   13.53 
  -3 -11  -2  921.40   39.82 
  -3 -11  -2  889.49   42.35 
   3  11   2  856.67   39.06 
   3  11   2  868.24   40.86 
  -4 -11  -2  591.52   29.84 
   4  11   2  592.75   26.55 
   4  11   2  582.60   28.53 
  -5 -11  -2  404.81   20.02 
  -5 -11  -2  418.00   22.79 
   5  11   2  450.22   21.41 
   5  11   2  411.39   19.43 
  -6 -11  -2  243.44   15.62 
   6  11   2  240.40   13.88 
  -7 -11  -2  214.42   15.20 
   7  11   2  214.63   13.75 
  -8 -11  -2  113.36   10.91 
   8  11   2  121.82   10.53 
   4 -12  -2  255.86   13.71 
   4 -12  -2  259.14   13.29 
  -4  12   2  279.52   16.25 
  -4  12   2  256.02   13.41 
  -4  12   2  231.46   16.83 
   3 -12  -2  211.08   12.15 
   3 -12  -2  204.79   10.92 
  -3  12   2  211.04   14.93 
  -3  12   2  196.86   11.00 
  -3  12   2  202.54   12.81 
   2 -12  -2  337.49   17.22 
  -2  12   2  326.94   18.51 
  -2  12   2  376.84   25.27 
  -2  12   2  317.11   16.19 
   1 -12  -2  641.19   28.57 
  -1  12   2  603.43   29.72 
  -1  12   2  580.76   27.53 
   0 -12  -2  988.81   43.97 
   0  12   2  979.23   43.10 
   0  12   2  946.93   45.04 
  -1 -12  -2  779.91   35.13 
   1  12   2  758.24   34.29 
   1  12   2  764.50   36.30 
  -2 -12  -2  290.71   18.09 
  -2 -12  -2  293.93   15.07 
   2  12   2  306.15   16.04 
   2  12   2  290.22   14.08 
  -3 -12  -2  274.85   13.68 
  -3 -12  -2  234.13   16.49 
   3  12   2  259.36   14.58 
   3  12   2  271.98   12.83 
  -4 -12  -2  540.79   28.19 
   4  12   2  528.79   26.60 
  -5 -12  -2  129.39   11.78 
   5  12   2  134.32    9.59 
  -6 -12  -2   58.54    9.24 
   6  12   2   60.53    7.01 
  -7 -12  -2  316.45   19.30 
   7  12   2  309.07   18.18 
   2 -13  -2  424.83   19.92 
  -2  13   2  410.14   21.78 
  -2  13   2  367.89   19.21 
   1 -13  -2  206.55   11.68 
  -1  13   2  174.02   10.14 
  -1  13   2  196.43   13.13 
   0 -13  -2  131.86    8.28 
   0  13   2  120.92    9.37 
   0  13   2  122.65    7.47 
  -1 -13  -2  238.27   12.98 
   1  13   2  225.57   13.68 
  -2 -13  -2  527.93   24.98 
   2  13   2  516.86   25.91 
  -3 -13  -2  206.40   11.68 
   3  13   2  203.92   13.43 
  -4 -13  -2  347.08   21.06 
   4  13   2  346.31   19.26 
  -5 -13  -2  145.98   13.35 
   5  13   2  168.80   12.12 
   6  13   2  286.33   17.28 
  -1 -14  -2   59.30    7.04 
   1  14   2   59.24    8.78 
  -2 -14  -2  208.17   12.52 
   2  14   2  221.48   13.44 
   3  13  -3  545.42   25.77 
   3  13  -3  528.43   27.47 
   2  13  -3  790.52   38.10 
   2  13  -3  790.29   36.39 
   1  13  -3  248.64   13.59 
   1  13  -3  248.64   15.46 
  -1 -13   3  251.65   13.96 
   0  13  -3  416.26   22.23 
   0  13  -3  421.69   20.40 
   0 -13   3  404.52   20.21 
  -1  13  -3  224.20   13.46 
  -1  13  -3  217.56   12.18 
   1 -13   3  199.99   12.05 
  -2  13  -3  343.37   19.05 
  -2  13  -3  322.80   16.52 
   2 -13   3  324.00   16.60 
   5  12  -3  231.10   14.90 
   5  12  -3  225.07   13.04 
  -5 -12   3  227.71   16.85 
   4  12  -3  606.73   28.42 
   4  12  -3  594.10   29.92 
   3  12  -3  321.87   18.58 
   3  12  -3  348.65   17.17 
   2  12  -3  109.92    7.11 
   2  12  -3   94.45    9.39 
   1  12  -3  250.32   15.29 
   1  12  -3  254.14   13.32 
  -1 -12   3  271.14   13.70 
   0  12  -3  280.14   13.85 
   0  12  -3  267.94   15.20 
   0 -12   3  262.37   14.08 
  -1  12  -3  181.95   10.66 
  -1  12  -3  164.41   12.22 
   1 -12   3  198.20   10.63 
  -2  12  -3  322.28   16.71 
  -2  12  -3  320.57   19.26 
  -2  12  -3  331.81   18.46 
   2 -12   3  342.37   16.80 
  -3  12  -3  153.40   11.12 
  -3  12  -3  133.24    9.16 
  -3  12  -3  137.50   12.07 
   3 -12   3  138.07    9.35 
   3 -12   3  138.51    8.19 
  -4  12  -3  187.77   14.06 
  -4  12  -3  190.36   11.19 
  -4  12  -3  194.54   13.26 
   4 -12   3  188.55   11.37 
   4 -12   3  170.49   10.23 
   6  11  -3  410.11   22.46 
   6  11  -3  432.21   21.20 
  -6 -11   3  434.80   24.64 
   5  11  -3  231.93   12.59 
   5  11  -3  219.01   13.19 
  -5 -11   3  209.53   15.55 
   4  11  -3  195.45   11.44 
   4  11  -3  195.76   12.89 
  -4 -11   3  204.06   14.74 
   3  11  -3  275.06   14.19 
   3  11  -3  253.08   15.34 
  -3 -11   3  277.60   17.38 
   2  11  -3  174.07   10.07 
   2  11  -3  171.62   11.40 
  -2 -11   3  171.32    9.19 
   1  11  -3  101.08    8.83 
   1  11  -3  116.90    7.46 
  -1 -11   3   93.76    6.42 
   0  11  -3  109.65    6.94 
   0  11  -3  110.81    9.92 
   0  11  -3  102.45    6.22 
   0  11  -3  109.58    8.17 
   0 -11   3  122.84    7.27 
  -1  11  -3  236.50   14.31 
  -1  11  -3  274.47   16.03 
  -1  11  -3  286.08   13.67 
   1 -11   3  250.19   12.46 
   1 -11   3  258.54   13.34 
  -2  11  -3  132.55    9.29 
  -2  11  -3  113.74   10.61 
  -2  11  -3  145.05    8.10 
   2 -11   3  140.15    7.97 
   2 -11   3  133.70    7.49 
  -3  11  -3  468.04   25.64 
  -3  11  -3  539.11   23.61 
  -3  11  -3  498.98   25.03 
   3 -11   3  483.54   23.22 
   3 -11   3  486.01   22.75 
  -4  11  -3  498.29   23.35 
  -4  11  -3  473.33   25.67 
  -4  11  -3  478.21   24.60 
   4 -11   3  506.07   23.51 
   4 -11   3  485.18   22.72 
  -5  11  -3  455.69   24.39 
  -5  11  -3  475.49   25.20 
  -5  11  -3  468.50   22.73 
   5 -11   3  473.50   22.22 
   5 -11   3  471.70   22.87 
   7  10  -3  116.10    8.20 
   7  10  -3  115.11   10.33 
  -7 -10   3  140.91   12.50 
   6  10  -3  143.18   10.79 
   6  10  -3  140.91    9.52 
  -6 -10   3  153.43   12.68 
   5  10  -3  261.54   14.33 
   5  10  -3  257.70   15.39 
  -5 -10   3  303.54   17.74 
   4  10  -3   92.96    7.52 
   4  10  -3  106.29    7.42 
  -4 -10   3   94.73    9.99 
   3  10  -3  649.82   29.75 
   3  10  -3  652.00   30.97 
  -3 -10   3  642.17   32.40 
   2  10  -3  247.66   13.76 
   2  10  -3  246.49   13.09 
  -2 -10   3  260.61   15.83 
  -2 -10   3  252.93   12.25 
   1  10  -3  632.64   30.84 
   1  10  -3  615.16   28.84 
   1  10  -3  607.22   27.80 
   1  10  -3  615.76   29.76 
  -1 -10   3  676.73   31.59 
   0  10  -3  646.76   27.94 
   0  10  -3  616.41   30.79 
   0  10  -3  643.03   30.06 
   0  10  -3  604.18   28.77 
   0 -10   3  632.14   28.51 
  -1  10  -3  239.68   11.15 
  -1  10  -3  212.50   11.94 
  -1  10  -3  219.47   14.04 
  -1  10  -3  242.81   13.48 
   1 -10   3  236.42   11.84 
  -2  10  -3  341.67   17.49 
  -2  10  -3  388.22   19.86 
  -2  10  -3  367.83   16.86 
  -2  10  -3  349.77   18.81 
   2 -10   3  356.83   17.45 
  -3  10  -3  428.55   22.25 
  -3  10  -3  436.11   20.23 
  -3  10  -3  385.86   21.30 
   3 -10   3  419.39   20.17 
   3 -10   3  432.36   19.60 
  -4  10  -3  279.19   16.79 
  -4  10  -3  321.59   14.95 
  -4  10  -3  281.06   16.16 
   4 -10   3  285.69   14.23 
   4 -10   3  285.63   14.51 
  -5  10  -3  370.69   20.23 
  -5  10  -3  378.70   17.86 
  -5  10  -3  330.74   19.29 
   5 -10   3  376.71   18.23 
   5 -10   3  360.14   17.58 
  -6  10  -3  271.55   16.60 
  -6  10  -3  257.25   15.92 
  -6  10  -3  293.72   14.71 
   6 -10   3  269.61   14.58 
   6 -10   3  267.28   14.06 
   8   9  -3   93.76    9.51 
   8   9  -3   99.63    8.36 
  -8  -9   3   88.07   10.76 
   7   9  -3  150.52   10.98 
   7   9  -3  148.94    9.89 
  -7  -9   3  151.67   12.62 
   6   9  -3  130.40    8.93 
   6   9  -3  135.87    9.94 
  -6  -9   3  136.65   11.61 
   5   9  -3  228.24   12.62 
   5   9  -3  236.09   13.50 
  -5  -9   3  238.80   15.25 
   4   9  -3  487.91   24.50 
   4   9  -3  496.79   23.75 
  -4  -9   3  530.02   26.32 
   3   9  -3  331.66   17.96 
   3   9  -3  345.64   17.15 
   3   9  -3  378.31   16.76 
  -3  -9   3  358.89   16.20 
  -3  -9   3  341.68   19.36 
   2   9  -3  731.87   30.53 
   2   9  -3  704.68   31.55 
   2   9  -3  655.47   33.09 
   2   9  -3  692.64   32.37 
  -2  -9   3  699.55   33.75 
  -2  -9   3  683.28   30.93 
   1   9  -3  218.95   11.55 
   1   9  -3  234.68   13.64 
   1   9  -3  231.46   10.76 
   1   9  -3  222.08   12.84 
  -1  -9   3  238.07   14.11 
   0   9  -3 1278.15   53.57 
   0   9  -3 1242.58   54.51 
   0   9  -3 1202.94   52.71 
   0   9  -3 1233.23   55.24 
   0  -9   3 1161.40   53.09 
   0  -9   3 1142.76   55.28 
  -1   9  -3 1619.26   72.45 
  -1   9  -3 1616.35   71.74 
  -1   9  -3 1583.63   70.69 
  -1   9  -3 1660.64   70.13 
   1  -9   3 1578.79   70.50 
  -2   9  -3  668.50   30.08 
  -2   9  -3  673.44   32.40 
  -2   9  -3  655.79   31.70 
  -2   9  -3  705.85   30.63 
   2  -9   3  671.13   30.53 
  -3   9  -3  352.37   17.92 
  -3   9  -3  335.01   16.01 
  -3   9  -3  310.52   15.37 
  -3   9  -3  311.45   17.02 
   3  -9   3  321.33   15.88 
  -4   9  -3  422.67   21.68 
  -4   9  -3  419.98   20.91 
  -4   9  -3  422.33   19.78 
   4  -9   3  426.03   19.54 
   4  -9   3  401.05   19.90 
  -5   9  -3  230.73   13.88 
  -5   9  -3  218.57   12.05 
  -5   9  -3  220.60   13.31 
   5  -9   3  231.56   12.17 
   5  -9   3  226.38   11.70 
  -6   9  -3  147.59    9.15 
  -6   9  -3  167.94   11.48 
  -6   9  -3  157.48   11.00 
   6  -9   3  157.00    9.32 
   6  -9   3  168.53    9.90 
  -7   9  -3  189.99   12.52 
  -7   9  -3  179.11   10.51 
  -7   9  -3  190.95   12.79 
   7  -9   3  169.85   10.58 
   7  -9   3  198.64   11.25 
   8   8  -3  140.10    9.54 
   8   8  -3  126.19    9.53 
  -8  -8   3  140.16   12.75 
   7   8  -3  119.10    8.97 
   7   8  -3  129.09    9.12 
  -7  -8   3  151.54   11.75 
   6   8  -3  223.42   12.38 
   6   8  -3  227.63   12.69 
  -6  -8   3  229.21   14.83 
   5   8  -3  263.86   14.87 
   5   8  -3  269.27   14.21 
  -5  -8   3  299.08   16.68 
   4   8  -3  643.54   30.25 
   4   8  -3  640.45   29.65 
   4   8  -3  678.76   28.45 
  -4  -8   3  622.37   31.61 
   3   8  -3  835.51   37.90 
   3   8  -3  843.41   37.35 
   3   8  -3  812.68   36.31 
   3   8  -3  846.91   38.81 
  -3  -8   3  810.37   39.31 
  -3  -8   3  846.34   36.53 
   2   8  -3 1259.83   55.64 
   2   8  -3 1225.05   54.80 
   2   8  -3 1194.79   54.17 
   2   8  -3 1180.00   53.25 
  -2  -8   3 1310.52   56.21 
  -2  -8   3 1194.82   53.50 
   1   8  -3  423.98   20.84 
   1   8  -3  420.57   20.15 
   1   8  -3  431.13   18.49 
   1   8  -3  422.21   19.42 
  -1  -8   3  390.18   18.69 
  -1  -8   3  389.67   20.92 
   0   8  -3  786.11   35.91 
   0   8  -3  787.00   35.30 
   0   8  -3  761.26   34.36 
   0   8  -3  767.49   33.75 
   0  -8   3  739.42   34.02 
  -1   8  -3  251.37   11.69 
  -1   8  -3  246.33   13.41 
  -1   8  -3  224.62   11.09 
  -1   8  -3  234.30   12.40 
   1  -8   3  225.73   11.48 
   1  -8   3  234.36   13.36 
  -2   8  -3  701.59   31.30 
  -2   8  -3  737.35   32.91 
  -2   8  -3  649.37   30.73 
  -2   8  -3  695.86   32.18 
   2  -8   3  687.21   31.10 
  -3   8  -3  750.09   34.04 
  -3   8  -3  775.56   34.67 
  -3   8  -3  716.19   32.62 
  -3   8  -3  702.85   33.03 
   3  -8   3  725.05   32.94 
  -4   8  -3  560.18   26.05 
  -4   8  -3  547.97   27.55 
  -4   8  -3  581.89   27.13 
  -4   8  -3  590.54   25.67 
   4  -8   3  559.08   25.99 
  -5   8  -3  330.78   17.17 
  -5   8  -3  343.92   17.89 
  -5   8  -3  340.10   16.46 
   5  -8   3  329.11   16.11 
   5  -8   3  338.65   16.22 
  -6   8  -3   39.05    7.05 
  -6   8  -3   45.05    6.17 
  -6   8  -3   48.67    4.56 
   6  -8   3   37.60    4.89 
   6  -8   3   48.99    4.56 
  -7   8  -3  322.00   17.24 
  -7   8  -3  326.50   15.61 
  -7   8  -3  281.53   16.48 
   7  -8   3  282.94   15.02 
   7  -8   3  292.00   15.12 
  -8   8  -3  229.20   14.69 
  -8   8  -3  207.42   14.12 
  -8   8  -3  242.52   12.64 
   8  -8   3  251.16   13.14 
   8  -8   3  239.55   12.85 
   9   7  -3  353.25   18.70 
   9   7  -3  333.97   17.48 
  -9  -7   3  309.75   19.87 
   8   7  -3  406.88   19.80 
   8   7  -3  399.40   20.61 
  -8  -7   3  376.23   21.68 
   7   7  -3  782.88   38.94 
   7   7  -3  842.77   38.38 
  -7  -7   3  896.25   40.77 
   6   7  -3  799.36   36.03 
   6   7  -3  751.40   36.38 
  -6  -7   3  823.56   38.21 
   5   7  -3 1367.91   60.10 
   5   7  -3 1344.10   58.45 
   5   7  -3 1382.57   59.60 
  -5  -7   3 1292.35   61.23 
   4   7  -3  761.50   34.10 
   4   7  -3  764.28   35.12 
   4   7  -3  762.78   35.57 
  -4  -7   3  831.53   37.17 
   3   7  -3   21.56    3.11 
   3   7  -3   22.03    3.46 
   3   7  -3   28.71    4.90 
   3   7  -3   26.43    2.35 
  -3  -7   3   30.71    5.70 
  -3  -7   3   21.40    2.22 
   2   7  -3  898.81   40.27 
   2   7  -3  883.62   39.51 
   2   7  -3  902.65   39.07 
   2   7  -3  839.54   38.17 
  -2  -7   3  860.45   38.29 
   1   7  -3  858.83   39.23 
   1   7  -3  829.34   37.96 
   1   7  -3  891.95   38.69 
   1   7  -3  844.06   37.30 
  -1  -7   3  832.30   37.46 
  -1  -7   3  872.95   39.54 
   0   7  -3  451.90   21.90 
   0   7  -3  486.44   21.29 
   0   7  -3  432.14   20.62 
   0   7  -3  467.95   20.02 
   0  -7   3  448.01   20.21 
   0  -7   3  407.74   21.83 
  -1   7  -3  943.80   42.79 
  -1   7  -3  983.47   44.52 
  -1   7  -3  955.51   43.93 
  -1   7  -3 1007.10   43.31 
   1  -7   3 1047.59   44.79 
   1  -7   3  940.15   42.97 
  -2   7  -3  148.66    9.30 
  -2   7  -3  140.28    8.80 
  -2   7  -3  146.66    8.10 
  -2   7  -3  161.16    7.49 
  -2   7  -3  153.51    9.52 
   2  -7   3  137.45    7.59 
   2  -7   3  160.53    9.53 
  -3   7  -3  201.54    9.96 
  -3   7  -3  175.88   10.50 
  -3   7  -3  194.91   11.16 
  -3   7  -3  205.23    9.56 
   3  -7   3  180.13   12.64 
   3  -7   3  188.20    9.74 
  -4   7  -3  892.26   38.78 
  -4   7  -3  873.93   38.42 
  -4   7  -3  869.06   39.93 
  -4   7  -3  851.74   39.48 
   4  -7   3  855.96   38.66 
  -5   7  -3  496.50   25.03 
  -5   7  -3  544.56   24.34 
  -5   7  -3  561.89   25.66 
   5  -7   3  514.09   24.24 
   5  -7   3  515.54   24.03 
  -6   7  -3  359.50   17.91 
  -6   7  -3  339.65   16.75 
  -6   7  -3  325.23   17.56 
   6  -7   3  344.31   16.52 
   6  -7   3  346.54   16.73 
  -7   7  -3  819.09   37.90 
  -7   7  -3  786.11   36.60 
  -7   7  -3  753.36   37.51 
   7  -7   3  841.42   36.68 
   7  -7   3  835.03   36.49 
  -8   7  -3  455.93   21.21 
  -8   7  -3  428.99   22.33 
   8  -7   3  419.61   20.77 
   8  -7   3  444.11   20.97 
  -9   7  -3  359.16   19.07 
  -9   7  -3  328.14   18.86 
  -9   7  -3  339.16   17.60 
   9  -7   3  340.75   17.46 
   9  -7   3  346.33   17.38 
   9   6  -3  542.82   27.28 
   9   6  -3  547.72   28.16 
  -9  -6   3  615.25   29.70 
   8   6  -3  465.65   21.87 
   8   6  -3  442.94   22.58 
  -8  -6   3  432.85   23.65 
   7   6  -3  749.11   36.02 
   7   6  -3  746.06   35.26 
  -7  -6   3  829.28   37.56 
   6   6  -3  404.99   20.49 
   6   6  -3  414.30   21.03 
   6   6  -3  440.02   19.51 
  -6  -6   3  460.28   22.49 
   5   6  -3 1020.89   46.37 
   5   6  -3 1042.91   46.01 
   5   6  -3 1010.52   45.15 
  -5  -6   3 1063.24   47.72 
   4   6  -3 1135.48   50.81 
   4   6  -3 1187.95   51.52 
   4   6  -3 1185.88   49.72 
   4   6  -3 1156.43   50.55 
  -4  -6   3 1043.05   51.77 
   3   6  -3 1801.36   80.41 
   3   6  -3 1864.80   79.72 
   3   6  -3 1860.88   80.77 
   3   6  -3 1997.77   81.58 
  -3  -6   3 1990.66   82.08 
  -3  -6   3 1762.84   79.51 
  -3  -6   3 1807.91   81.63 
  -3  -6   3 1676.20   79.45 
   2   6  -3  225.46   11.08 
   2   6  -3  233.47   10.23 
   2   6  -3  219.36   11.14 
   2   6  -3  227.39   12.06 
  -2  -6   3  217.18   10.17 
  -2  -6   3  212.15   12.40 
   1   6  -3  489.50   22.53 
   1   6  -3  520.46   24.24 
   1   6  -3  523.67   23.17 
   1   6  -3  537.61   23.67 
  -1  -6   3  498.81   24.41 
  -1  -6   3  501.90   22.60 
   0   6  -3  534.73   22.58 
   0   6  -3  530.40   24.16 
   0   6  -3  495.78   23.04 
   0   6  -3  535.53   23.63 
   0  -6   3  479.38   24.10 
   0  -6   3  486.19   22.63 
  -1   6  -3  542.64   24.51 
  -1   6  -3  491.81   23.45 
  -1   6  -3  565.42   24.06 
  -1   6  -3  543.70   24.99 
   1  -6   3  517.82   23.62 
  -2   6  -3  842.04   36.80 
  -2   6  -3  818.03   37.63 
  -2   6  -3  857.21   38.17 
  -2   6  -3  854.10   38.34 
  -2   6  -3  857.04   37.16 
   2  -6   3  820.95   38.10 
   2  -6   3  819.44   36.94 
  -3   6  -3 1242.64   54.51 
  -3   6  -3 1204.98   54.98 
  -3   6  -3 1321.02   55.57 
  -3   6  -3 1243.78   54.24 
  -3   6  -3 1234.13   55.58 
   3  -6   3 1212.28   54.34 
   3  -6   3 1236.62   55.32 
  -4   6  -3  160.12    8.42 
  -4   6  -3  155.38    9.30 
  -4   6  -3  155.40    7.92 
  -4   6  -3  166.38    9.37 
  -4   6  -3  162.10    9.01 
   4  -6   3  144.65    8.24 
  -5   6  -3  748.93   33.35 
  -5   6  -3  674.16   33.54 
  -5   6  -3  729.08   32.64 
  -5   6  -3  749.39   32.58 
   5  -6   3  747.85   32.72 
  -6   6  -3  772.83   35.97 
  -6   6  -3  812.89   35.98 
  -6   6  -3  773.57   35.04 
   6  -6   3  781.69   34.95 
   6  -6   3  766.94   35.05 
  -7   6  -3  497.21   24.03 
  -7   6  -3  477.52   23.08 
  -7   6  -3  497.15   23.84 
   7  -6   3  493.65   22.94 
   7  -6   3  504.78   22.94 
  -8   6  -3 1019.74   45.43 
  -8   6  -3  931.75   44.37 
  -8   6  -3  950.00   45.46 
   8  -6   3 1033.08   44.40 
   8  -6   3 1011.02   44.43 
  -9   6  -3  299.35   15.32 
  -9   6  -3  278.38   16.09 
  -9   6  -3  288.79   16.39 
   9  -6   3  304.50   15.19 
   9  -6   3  298.97   15.13 
   9   5  -3  477.52   23.12 
   9   5  -3  453.28   23.86 
  -9  -5   3  484.52   25.45 
   8   5  -3  504.60   23.38 
   8   5  -3  456.56   23.25 
   8   5  -3  441.36   22.50 
  -8  -5   3  478.54   24.51 
   7   5  -3  633.95   28.60 
   7   5  -3  637.34   29.35 
   7   5  -3  640.26   30.07 
  -7  -5   3  644.22   31.27 
   6   5  -3  279.90   15.49 
   6   5  -3  305.87   15.18 
   6   5  -3  321.81   14.25 
  -6  -5   3  311.71   17.06 
   5   5  -3  383.44   17.51 
   5   5  -3  368.14   18.42 
   5   5  -3  371.52   18.27 
  -5  -5   3  421.07   20.01 
   4   5  -3  279.94   13.79 
   4   5  -3  251.00   12.17 
   4   5  -3  273.25   12.85 
   4   5  -3  250.54   12.97 
  -4  -5   3  282.95   14.50 
  -4  -5   3  253.04   13.94 
   3   5  -3  308.22   15.23 
   3   5  -3  301.92   15.80 
   3   5  -3  328.36   14.40 
   3   5  -3  318.74   15.10 
  -3  -5   3  339.70   13.96 
  -3  -5   3  320.56   16.10 
  -3  -5   3  321.10   16.32 
  -3  -5   3  307.11   13.95 
   2   5  -3 2873.96  123.86 
   2   5  -3 2857.63  124.57 
   2   5  -3 2776.79  124.37 
  -2  -5   3 3015.05  125.62 
  -2  -5   3 2821.44  125.33 
  -2  -5   3 2894.54  123.71 
   1   5  -3 1194.80   50.08 
   1   5  -3 1183.48   50.79 
   1   5  -3 1064.92   51.30 
   1   5  -3 1161.80   50.56 
  -1  -5   3 1180.22   51.70 
  -1  -5   3 1138.54   50.01 
   0   5  -3 1541.94   66.72 
   0   5  -3 1586.31   66.19 
   0   5  -3 1365.52   66.61 
   0   5  -3 1497.03   65.39 
   0   5  -3 1516.37   65.84 
   0  -5   3 1558.64   66.84 
   0  -5   3 1511.92   65.43 
  -1   5  -3 1307.52   56.35 
  -1   5  -3 1380.64   57.35 
  -1   5  -3 1274.85   55.98 
  -1   5  -3 1309.23   57.19 
  -1   5  -3 1251.55   56.63 
   1  -5   3 1254.94   56.04 
   1  -5   3 1249.96   57.13 
  -2   5  -3 1994.42   88.65 
  -2   5  -3 2075.36   88.07 
  -2   5  -3 2133.06   88.34 
  -2   5  -3 2090.47   89.15 
   2  -5   3 1918.04   89.00 
   2  -5   3 2003.69   88.13 
  -3   5  -3 1326.71   56.89 
  -3   5  -3 1319.91   56.51 
  -3   5  -3 1416.09   57.38 
  -3   5  -3 1251.11   57.27 
  -3   5  -3 1292.31   56.29 
   3  -5   3 1286.13   56.38 
   3  -5   3 1158.73   56.91 
  -4   5  -3  874.70   39.10 
  -4   5  -3  806.74   39.28 
  -4   5  -3  954.31   38.61 
  -4   5  -3  897.16   39.53 
  -4   5  -3  852.51   38.65 
   4  -5   3  872.47   38.61 
  -5   5  -3 1726.00   78.03 
  -5   5  -3 1739.84   77.30 
  -5   5  -3 1753.77   78.02 
  -5   5  -3 1875.09   77.26 
  -5   5  -3 1779.09   77.89 
   5  -5   3 1775.38   77.29 
  -6   5  -3  274.60   13.62 
  -6   5  -3  255.46   13.50 
  -6   5  -3  254.32   12.72 
   6  -5   3  266.59   12.82 
   6  -5   3  266.64   12.91 
  -7   5  -3  517.97   23.58 
  -7   5  -3  513.34   24.14 
  -7   5  -3  463.39   24.17 
   7  -5   3  516.46   23.44 
   7  -5   3  529.67   23.53 
  -8   5  -3  251.91   13.51 
  -8   5  -3  239.07   12.80 
  -8   5  -3  238.46   13.71 
   8  -5   3  251.51   12.75 
   8  -5   3  256.01   12.79 
  -9   5  -3  179.36   10.95 
  -9   5  -3  160.63   11.12 
  -9   5  -3  174.25   10.32 
   9  -5   3  175.19   10.08 
   9  -5   3  184.45   10.21 
 -10   5  -3   94.57    8.94 
 -10   5  -3  118.01    7.43 
 -10   5  -3   95.76    8.39 
  10  -5   3   96.46    7.80 
  10  -5   3  109.87    7.66 
  10   4  -3  406.31   22.39 
  10   4  -3  431.88   21.53 
 -10  -4   3  444.77   23.81 
   9   4  -3  110.78    7.76 
   9   4  -3  134.76    9.16 
   9   4  -3  137.28    9.17 
  -9  -4   3  140.41   11.37 
   8   4  -3  198.46   11.00 
   8   4  -3  187.95   11.59 
   8   4  -3  184.92    9.73 
  -8  -4   3  190.89   12.58 
   7   4  -3   70.93    5.79 
   7   4  -3   72.68    5.03 
   7   4  -3   66.03    5.27 
  -7  -4   3   73.59    7.96 
   6   4  -3  279.06   14.97 
   6   4  -3  288.85   13.90 
   6   4  -3  301.75   14.68 
  -6  -4   3  318.37   16.31 
   5   4  -3  325.88   17.16 
   5   4  -3  345.93   16.58 
   5   4  -3  349.84   16.89 
   5   4  -3  363.39   16.16 
  -5  -4   3  358.74   18.19 
  -5  -4   3  376.88   17.95 
   4   4  -3  739.14   31.61 
   4   4  -3  692.23   31.07 
   4   4  -3  670.29   31.75 
   4   4  -3  775.23   32.45 
  -4  -4   3  685.28   32.52 
  -4  -4   3  674.57   32.75 
   3   4  -3  200.73    9.81 
   3   4  -3  206.66   10.37 
   3   4  -3  204.58   10.46 
   3   4  -3  218.25   11.22 
  -3  -4   3  223.59   11.64 
  -3  -4   3  222.27   11.32 
  -3  -4   3  197.81    9.15 
  -3  -4   3  216.72    9.17 
   2   4  -3  670.13   28.99 
   2   4  -3  616.18   29.43 
   2   4  -3  666.92   29.41 
   2   4  -3  659.43   30.16 
  -2  -4   3  667.29   30.46 
  -2  -4   3  649.66   28.67 
  -2  -4   3  630.31   28.67 
  -2  -4   3  735.88   30.45 
   1   4  -3 2286.41   99.57 
   1   4  -3 2296.36   99.52 
   1   4  -3 2277.32   99.12 
   1   4  -3 2373.27  100.30 
  -1  -4   3 2248.98  100.25 
  -1  -4   3 2288.26   98.98 
  -1  -4   3 2305.41   99.00 
  -1  -4   3 2306.05  100.38 
   0   4  -3 5365.57  229.05 
   0   4  -3 5161.55  228.25 
   0   4  -3 5265.07  228.42 
   0   4  -3 5579.65  228.90 
   0   4  -3 5133.53  228.90 
  -1   4  -3   96.70    6.07 
  -1   4  -3   87.47    5.98 
  -1   4  -3  110.68    5.14 
  -1   4  -3  105.97    5.34 
   1  -4   3  108.12    6.14 
   1  -4   3  101.16    5.11 
  -2   4  -3 3101.46  135.14 
  -2   4  -3 3268.09  135.82 
  -2   4  -3 3359.99  135.01 
  -2   4  -3 3101.56  135.34 
  -2   4  -3 2880.39  135.74 
   2  -4   3 3111.20  135.70 
   2  -4   3 3091.68  134.99 
  -3   4  -3 1183.02   50.23 
  -3   4  -3 1078.95   49.44 
  -3   4  -3 1112.55   49.60 
  -3   4  -3 1186.43   49.91 
  -3   4  -3 1034.78   50.09 
   3  -4   3 1198.83   50.04 
   3  -4   3 1153.43   49.53 
  -4   4  -3  693.87   31.12 
  -4   4  -3  752.60   30.78 
  -4   4  -3  668.58   30.72 
  -4   4  -3  684.00   31.30 
  -4   4  -3  680.32   31.27 
   4  -4   3  690.00   30.72 
  -5   4  -3  684.62   31.26 
  -5   4  -3  720.71   31.34 
  -5   4  -3  684.85   31.77 
  -5   4  -3  683.92   31.83 
  -5   4  -3  758.22   31.89 
   5  -4   3  701.58   31.34 
  -6   4  -3  967.05   43.49 
  -6   4  -3  945.43   43.84 
  -6   4  -3  989.62   44.01 
  -6   4  -3 1017.96   43.92 
   6  -4   3  993.36   43.42 
   6  -4   3  991.44   43.46 
  -7   4  -3  302.89   15.50 
  -7   4  -3  299.28   14.27 
  -7   4  -3  279.56   15.06 
  -7   4  -3  299.33   14.80 
   7  -4   3  304.35   14.38 
   7  -4   3  298.01   14.19 
  -8   4  -3  144.71    8.39 
  -8   4  -3  144.51    9.04 
  -8   4  -3  161.75    9.69 
   8  -4   3  165.99    8.42 
   8  -4   3  160.46    8.77 
  -9   4  -3  181.78   10.06 
  -9   4  -3  186.32   11.04 
  -9   4  -3  159.91   10.18 
   9  -4   3  176.43    9.76 
   9  -4   3  173.42    9.88 
 -10   4  -3   82.99    8.02 
 -10   4  -3   78.91    6.99 
 -10   4  -3   81.37    7.04 
  10  -4   3   91.68    6.58 
  10  -4   3   71.14    6.76 
  10   3  -3  392.57   20.97 
  10   3  -3  384.58   19.53 
 -10  -3   3  401.85   22.15 
   9   3  -3  215.07   13.34 
   9   3  -3  229.33   11.67 
   9   3  -3  229.22   12.58 
  -9  -3   3  214.26   14.38 
   8   3  -3  200.64   10.88 
   8   3  -3  202.62   11.85 
   8   3  -3  219.00   11.34 
  -8  -3   3  230.52   13.80 
   7   3  -3  211.05   11.66 
   7   3  -3  231.18   10.99 
   7   3  -3  217.94   12.31 
  -7  -3   3  228.88   13.27 
   6   3  -3  231.96   11.34 
   6   3  -3  219.80   11.94 
   6   3  -3  226.53   10.89 
  -6  -3   3  226.56   12.93 
   5   3  -3  439.76   20.39 
   5   3  -3  455.25   20.76 
   5   3  -3  479.96   19.97 
  -5  -3   3  394.14   21.45 
  -5  -3   3  443.62   21.49 
   4   3  -3 1294.06   55.32 
   4   3  -3 1186.26   54.74 
   4   3  -3 1264.99   54.28 
   4   3  -3 1243.97   54.60 
  -4  -3   3 1242.13   55.80 
   3   3  -3  659.11   28.75 
   3   3  -3  628.91   29.68 
   3   3  -3  610.88   29.10 
   3   3  -3  683.21   29.09 
  -3  -3   3  733.12   30.38 
  -3  -3   3  610.12   29.82 
   2   3  -3 1683.18   71.56 
   2   3  -3 1611.72   72.49 
   2   3  -3 1612.95   71.83 
   2   3  -3 1619.05   71.84 
  -2  -3   3 1722.98   72.66 
  -2  -3   3 1586.83   71.18 
  -2  -3   3 1721.84   72.83 
  -2  -3   3 1671.40   71.15 
   1   3  -3  729.62   33.32 
   1   3  -3  727.24   32.62 
   1   3  -3  675.55   32.63 
   1   3  -3  811.19   32.45 
  -1  -3   3  720.63   32.16 
  -1  -3   3  745.89   32.20 
  -1  -3   3  789.54   32.77 
  -1  -3   3  741.69   32.54 
   0   3  -3  116.98    5.51 
   0   3  -3  112.69    6.43 
   0   3  -3  115.07    5.72 
   0   3  -3   98.16    5.69 
   0   3  -3  123.77    6.52 
   0  -3   3  104.72    6.33 
   0  -3   3  115.40    5.57 
   0  -3   3  112.28    6.36 
   0  -3   3  124.03    5.42 
  -1   3  -3 3527.50  151.42 
  -1   3  -3 3442.08  151.92 
  -1   3  -3 3250.75  151.39 
  -1   3  -3 3468.87  151.94 
  -1   3  -3 3652.30  151.23 
   1  -3   3 3602.50  151.96 
   1  -3   3 3510.08  151.32 
   1  -3   3 3643.00  151.21 
  -2   3  -3  630.26   27.27 
  -2   3  -3  628.11   27.09 
  -2   3  -3  606.36   27.16 
  -2   3  -3  584.68   27.64 
  -2   3  -3  634.55   27.69 
   2  -3   3  625.22   27.08 
   2  -3   3  656.82   27.23 
   2  -3   3  571.18   27.53 
  -3   3  -3 1617.95   69.93 
  -3   3  -3 1738.78   69.53 
  -3   3  -3 1548.43   69.52 
  -3   3  -3 1537.03   69.91 
   3  -3   3 1582.15   69.49 
   3  -3   3 1598.73   69.66 
  -4   3  -3  467.66   20.13 
  -4   3  -3  473.27   20.03 
  -4   3  -3  419.03   20.01 
  -4   3  -3  416.58   19.70 
  -4   3  -3  427.99   19.74 
   4  -3   3  435.57   19.75 
  -5   3  -3  126.67    6.92 
  -5   3  -3  132.79    6.93 
  -5   3  -3  123.09    6.60 
  -5   3  -3  129.04    6.79 
  -5   3  -3  132.63    7.02 
   5  -3   3  129.78    6.61 
  -6   3  -3   71.47    5.09 
  -6   3  -3   77.85    5.08 
  -6   3  -3   86.55    5.66 
  -6   3  -3   81.79    5.27 
  -6   3  -3   83.22    4.78 
   6  -3   3   81.15    5.06 
  -7   3  -3  381.13   18.46 
  -7   3  -3  395.84   18.69 
  -7   3  -3  399.21   18.71 
  -7   3  -3  410.77   19.28 
   7  -3   3  414.46   18.62 
   7  -3   3  405.28   18.57 
  -8   3  -3  339.39   16.30 
  -8   3  -3  333.81   16.72 
  -8   3  -3  351.47   17.09 
  -8   3  -3  339.29   16.13 
   8  -3   3  333.90   16.12 
   8  -3   3  339.16   16.02 
  -9   3  -3  210.95   12.15 
  -9   3  -3  203.81   11.17 
  -9   3  -3  214.26   11.31 
   9  -3   3  209.06   11.12 
   9  -3   3  216.01   11.03 
 -10   3  -3  460.16   23.00 
 -10   3  -3  509.04   22.94 
 -10   3  -3  480.62   24.11 
  10  -3   3  485.16   22.72 
  10  -3   3  498.59   22.95 
  10   2  -3   65.85    6.21 
  10   2  -3   64.33    8.32 
  10   2  -3   68.49    5.95 
 -10  -2   3   70.28    9.29 
   9   2  -3  112.42    7.94 
   9   2  -3   97.07    6.71 
   9   2  -3   98.35    7.72 
  -9  -2   3  102.33    9.73 
   8   2  -3  208.42   11.67 
   8   2  -3  227.34   11.04 
   8   2  -3  212.96   12.01 
   7   2  -3 1249.41   54.32 
   7   2  -3 1186.85   54.83 
   7   2  -3 1245.50   53.86 
   6   2  -3  648.10   30.29 
   6   2  -3  687.87   29.99 
   6   2  -3  657.32   29.53 
   5   2  -3 1071.46   44.49 
   5   2  -3  994.87   44.19 
   5   2  -3 1008.49   43.56 
   5   2  -3 1003.36   43.88 
  -5  -2   3  894.45   44.78 
   4   2  -3  411.13   18.04 
   4   2  -3  404.69   17.72 
   4   2  -3  388.21   18.22 
   4   2  -3  394.45   18.63 
  -4  -2   3  371.80   18.83 
   3   2  -3 3123.02  131.44 
   3   2  -3 3012.97  131.62 
   3   2  -3 2999.53  132.27 
   3   2  -3 3099.87  131.78 
  -3  -2   3 3342.42  132.63 
  -3  -2   3 2850.77  132.55 
  -3  -2   3 2909.09  131.20 
   2   2  -3 1452.02   64.95 
   2   2  -3 1553.37   64.83 
   2   2  -3 1583.02   65.72 
   2   2  -3 1489.07   64.97 
   2   2  -3 1460.00   64.39 
  -2  -2   3 1501.12   64.43 
  -2  -2   3 1520.13   65.88 
  -2  -2   3 1412.88   65.62 
   1   2  -3 2039.04   88.09 
   1   2  -3 1990.45   88.22 
   1   2  -3 2254.00   87.86 
   1   2  -3 2121.61   88.90 
  -1  -2   3 1910.06   88.79 
  -1  -2   3 1924.52   87.83 
  -1  -2   3 1949.64   88.91 
  -1  -2   3 2132.31   88.17 
   0   2  -3  195.69    9.33 
   0   2  -3  172.65    8.69 
   0   2  -3  172.86    9.20 
   0   2  -3  183.03    8.53 
   0   2  -3  173.48    8.40 
   0   2  -3  181.46    8.51 
   0  -2   3  196.28    9.31 
   0  -2   3  195.65    8.44 
   0  -2   3  198.31    8.68 
   0  -2   3  181.70    8.44 
   0  -2   3  202.97    9.38 
   0  -2   3  189.79    8.57 
  -1   2  -3   57.80    3.50 
  -1   2  -3   54.38    3.39 
  -1   2  -3   45.09    2.74 
  -1   2  -3   44.60    2.62 
  -1   2  -3   43.56    2.78 
  -1   2  -3   48.53    2.80 
   1  -2   3   49.37    3.28 
   1  -2   3   51.73    2.68 
   1  -2   3   56.76    2.80 
   1  -2   3   45.24    2.72 
   1  -2   3   46.62    3.24 
   1  -2   3   50.76    2.75 
  -2   2  -3   38.09    2.52 
  -2   2  -3   39.22    2.93 
  -2   2  -3   35.93    2.30 
  -2   2  -3   40.83    2.41 
  -2   2  -3   38.79    2.47 
  -2   2  -3   35.61    2.68 
   2  -2   3   41.06    2.36 
  -3   2  -3   93.96    4.48 
  -3   2  -3   88.91    4.46 
  -3   2  -3   86.02    4.31 
  -3   2  -3   81.00    4.60 
  -3   2  -3   83.00    4.64 
   3  -2   3   79.58    4.12 
   3  -2   3   80.51    4.45 
  -4   2  -3  125.03    6.30 
  -4   2  -3  132.85    6.24 
  -4   2  -3  124.86    6.34 
  -4   2  -3  127.77    6.45 
  -4   2  -3  125.93    6.35 
   4  -2   3  122.56    6.33 
  -5   2  -3  719.02   32.18 
  -5   2  -3  667.90   31.76 
  -5   2  -3  722.16   31.81 
  -5   2  -3  770.20   31.89 
  -5   2  -3  722.31   31.84 
   5  -2   3  738.41   31.87 
  -6   2  -3 1146.45   50.81 
  -6   2  -3 1145.81   50.35 
  -6   2  -3 1155.72   50.29 
  -6   2  -3 1114.03   50.35 
  -6   2  -3 1140.43   50.25 
   6  -2   3 1201.04   50.38 
  -7   2  -3  380.54   17.56 
  -7   2  -3  369.95   17.77 
  -7   2  -3  402.26   18.41 
  -7   2  -3  389.57   17.59 
   7  -2   3  376.08   17.67 
   7  -2   3  384.49   17.73 
  -8   2  -3  102.67    6.38 
  -8   2  -3   98.92    5.88 
  -8   2  -3   96.60    6.95 
  -8   2  -3   96.66    5.86 
   8  -2   3   88.77    5.67 
   8  -2   3  104.13    6.11 
  -9   2  -3  737.96   34.02 
  -9   2  -3  696.74   34.94 
  -9   2  -3  769.24   34.20 
   9  -2   3  803.56   34.10 
   9  -2   3  787.32   34.19 
 -10   2  -3  378.99   18.24 
 -10   2  -3  370.48   19.13 
  10  -2   3  381.02   18.07 
  10  -2   3  384.01   18.28 
  10  -2   3  381.16   18.61 
 -11   2  -3  189.75   12.48 
 -11   2  -3  200.03   11.11 
  11  -2   3  172.88   11.61 
  11  -2   3  207.91   10.67 
  11  -2   3  194.67   11.48 
  10   1  -3  153.44   10.94 
  10   1  -3  131.37    8.68 
  10   1  -3  145.26    9.87 
   9   1  -3  164.98   10.05 
   9   1  -3  152.66    9.48 
  -9  -1   3  162.23   12.15 
  -9  -1   3  176.79   10.48 
   8   1  -3  370.52   17.82 
   8   1  -3  359.19   17.27 
  -8  -1   3  372.97   19.75 
  -8  -1   3  358.00   18.62 
   7   1  -3  172.25    9.07 
   7   1  -3  176.00    8.95 
  -7  -1   3  162.00    9.65 
  -7  -1   3  173.31   10.94 
   6   1  -3 1419.76   59.37 
   6   1  -3 1357.33   59.99 
   6   1  -3 1334.26   60.25 
  -6  -1   3 1263.24   64.43 
  -6  -1   3 1460.67   60.90 
  -6  -1   3 1399.63   61.77 
   5   1  -3  889.31   40.22 
   5   1  -3  987.19   41.09 
   5   1  -3  859.71   40.36 
   5   1  -3  946.65   39.69 
  -5  -1   3  951.90   41.82 
  -5  -1   3  912.93   39.68 
  -5  -1   3  863.33   40.79 
   4   1  -3 1459.26   66.59 
   4   1  -3 1525.74   66.47 
   4   1  -3 1615.31   66.03 
  -4  -1   3 1525.36   66.98 
  -4  -1   3 1571.89   67.85 
  -4  -1   3 1559.10   66.02 
  -4  -1   3 1461.05   67.65 
   3   1  -3 1552.50   67.07 
   3   1  -3 1481.82   67.16 
   3   1  -3 1541.35   67.93 
   3   1  -3 1584.89   66.69 
  -3  -1   3 1724.01   68.45 
  -3  -1   3 1466.96   67.34 
  -3  -1   3 1603.32   68.22 
  -3  -1   3 1434.47   66.66 
   2   1  -3  113.06    4.87 
   2   1  -3  102.70    5.23 
   2   1  -3  102.13    5.25 
   2   1  -3  105.65    6.08 
  -2  -1   3  102.99    6.16 
  -2  -1   3  106.40    4.85 
  -2  -1   3  107.59    5.40 
  -2  -1   3   97.92    6.29 
   1   1  -3  334.72   14.67 
   1   1  -3  355.70   14.42 
   1   1  -3  352.49   15.52 
   1   1  -3  309.64   15.34 
   1   1  -3  290.67   14.50 
   1   1  -3  308.53   14.53 
   1   1  -3  336.87   14.65 
  -1  -1   3  336.66   14.69 
  -1  -1   3  312.80   14.39 
  -1  -1   3  337.36   14.67 
  -1  -1   3  337.05   15.43 
   0   1  -3  854.52   37.60 
   0   1  -3  853.95   37.86 
   0   1  -3  869.15   37.85 
   0   1  -3  907.86   38.51 
   0   1  -3  849.10   37.63 
   0   1  -3  922.75   38.54 
   0   1  -3  847.43   37.71 
   0  -1   3  912.94   37.87 
   0  -1   3  836.78   37.71 
   0  -1   3  864.25   37.85 
   0  -1   3  859.93   38.45 
  -1   1  -3 1093.99   51.57 
  -1   1  -3 1155.44   52.00 
  -1   1  -3 1297.65   51.70 
  -1   1  -3 1256.28   51.63 
  -1   1  -3 1193.22   51.63 
  -1   1  -3 1173.76   52.09 
   1  -1   3 1235.85   51.61 
   1  -1   3 1211.32   51.59 
   1  -1   3 1197.97   51.46 
   1  -1   3 1186.82   51.59 
   1  -1   3 1171.53   52.06 
   1  -1   3 1137.93   51.95 
  -2   1  -3 1741.12   83.66 
  -2   1  -3 1967.13   83.50 
  -2   1  -3 1996.17   83.85 
  -2   1  -3 1844.48   83.50 
  -2   1  -3 1974.69   83.60 
  -2   1  -3 1864.04   83.37 
   2  -1   3 1985.16   83.60 
   2  -1   3 1948.70   83.49 
   2  -1   3 2172.45   83.66 
   2  -1   3 1917.75   83.37 
   2  -1   3 1781.97   83.64 
   2  -1   3 2047.07   83.57 
  -3   1  -3  230.22   11.43 
  -3   1  -3  269.75   11.52 
  -3   1  -3  260.41   11.58 
  -3   1  -3  251.62   11.46 
  -3   1  -3  220.00   11.50 
  -3   1  -3  265.14   11.46 
   3  -1   3  282.80   11.51 
  -4   1  -3  396.66   16.45 
  -4   1  -3  365.09   16.18 
  -4   1  -3  355.61   16.45 
  -4   1  -3  385.81   16.42 
  -4   1  -3  336.92   16.20 
  -5   1  -3  715.04   30.39 
  -5   1  -3  654.38   29.69 
  -5   1  -3  668.26   30.01 
  -5   1  -3  683.59   30.05 
   5  -1   3  694.76   30.08 
  -6   1  -3 1041.00   41.81 
  -6   1  -3  978.30   42.14 
  -6   1  -3  962.56   42.15 
  -6   1  -3  886.79   42.43 
  -6   1  -3  924.81   41.73 
   6  -1   3  966.22   42.12 
  -7   1  -3  741.63   32.49 
  -7   1  -3  700.21   32.01 
  -7   1  -3  732.20   33.01 
  -7   1  -3  766.46   32.07 
   7  -1   3  709.45   32.33 
   7  -1   3  730.10   32.38 
  -8   1  -3  979.23   45.35 
  -8   1  -3 1030.30   46.08 
  -8   1  -3 1052.51   45.00 
  -8   1  -3 1021.30   44.97 
   8  -1   3 1034.14   45.28 
   8  -1   3 1041.48   45.24 
  -9   1  -3  303.40   14.51 
  -9   1  -3  304.57   14.63 
  -9   1  -3  300.84   15.61 
   9  -1   3  324.52   14.78 
   9  -1   3  315.03   15.20 
   9  -1   3  311.70   14.78 
 -10   1  -3  414.04   20.93 
 -10   1  -3  418.44   19.89 
  10  -1   3  417.87   20.30 
  10  -1   3  431.98   19.93 
  10  -1   3  438.32   20.06 
 -11   1  -3  199.60   10.58 
 -11   1  -3  194.55   12.25 
  11  -1   3  174.51   11.05 
  11  -1   3  187.62   10.66 
  10   0  -3  142.66    8.93 
  10   0  -3  141.96    8.32 
 -10   0   3  143.39   11.97 
 -10   0   3  127.57   10.81 
   9   0  -3  617.91   28.14 
   9   0  -3  600.51   28.55 
  -9   0   3  615.03   30.52 
  -9   0   3  615.13   29.60 
   8   0  -3  255.71   13.46 
   8   0  -3  267.21   13.13 
  -8   0   3  266.02   14.08 
  -8   0   3  262.65   15.30 
   7   0  -3  293.69   14.25 
   7   0  -3  278.89   13.13 
   7   0  -3  288.27   13.76 
  -7   0   3  298.21   15.77 
  -7   0   3  292.74   14.75 
   6   0  -3 1084.78   46.89 
   6   0  -3 1060.90   47.42 
   6   0  -3 1053.22   47.60 
  -6   0   3  975.11   48.71 
  -6   0   3 1202.59   48.44 
  -6   0   3 1117.17   52.53 
   5   0  -3   25.28    2.00 
   5   0  -3   23.62    3.14 
   5   0  -3   24.57    2.46 
   5   0  -3   23.53    3.57 
  -5   0   3   29.64    4.26 
  -5   0   3   28.59    4.02 
  -5   0   3   28.91    2.45 
  -5   0   3   25.47    3.77 
   4   0  -3  833.46   38.56 
   4   0  -3  895.49   38.55 
   4   0  -3  901.46   38.18 
  -4   0   3  884.18   38.98 
  -4   0   3  845.44   39.63 
  -4   0   3  915.19   38.22 
   3   0  -3  781.47   35.12 
   3   0  -3  765.14   34.18 
   3   0  -3  792.16   34.19 
   3   0  -3  808.97   33.89 
  -3   0   3  768.33   35.17 
  -3   0   3  725.69   34.43 
  -3   0   3  820.76   35.39 
  -3   0   3  782.23   33.90 
   2   0  -3  454.78   20.87 
   2   0  -3  465.67   21.79 
   2   0  -3  454.21   20.65 
   2   0  -3  452.21   20.86 
  -2   0   3  473.62   20.69 
  -2   0   3  479.28   21.89 
  -2   0   3  524.69   21.95 
  -2   0   3  484.48   21.06 
   1   0  -3  538.04   24.07 
   1   0  -3  531.26   24.81 
   1   0  -3  535.90   23.96 
   1   0  -3  557.30   24.06 
   1   0  -3  542.26   24.11 
  -1   0   3  558.53   24.05 
  -1   0   3  566.23   24.16 
  -1   0   3  545.78   24.92 
  -1   0   3  567.15   24.93 
  -1   0   3  558.43   23.99 
   0   0  -3  889.74   39.39 
   0   0  -3  891.06   39.49 
   0   0  -3  933.61   40.16 
   0   0   3  884.59   39.48 
   0   0   3  861.30   39.38 
   0   0   3  933.72   40.10 
   0   0   3  924.09   39.23 
   0   0   3  926.88   40.11 
   0   0   3  933.75   39.36 
  -1   0  -3  290.18   12.79 
  -1   0  -3  299.82   12.78 
  -1   0  -3  286.60   13.25 
  -1   0  -3  282.78   12.66 
   1   0   3  294.96   12.77 
   1   0   3  271.63   13.09 
   1   0   3  296.09   12.79 
   1   0   3  287.77   12.64 
   1   0   3  277.49   13.13 
  -2   0  -3  669.78   28.46 
  -2   0  -3  625.73   28.78 
  -2   0  -3  636.71   28.85 
  -2   0  -3  640.38   28.72 
  -2   0  -3  672.84   28.53 
   2   0   3  706.52   28.76 
   2   0   3  600.06   28.55 
   2   0   3  654.67   28.53 
   2   0   3  666.71   28.64 
   2   0   3  707.68   28.48 
  -3   0  -3 2943.61  128.41 
  -3   0  -3 2872.45  127.31 
  -3   0  -3 2945.03  127.21 
  -3   0  -3 2948.20  128.44 
  -3   0  -3 2967.02  127.21 
   3   0   3 2838.16  127.39 
   3   0   3 2980.44  127.24 
   3   0   3 3136.20  127.16 
  -4   0  -3 4310.19  188.45 
  -4   0  -3 4108.39  188.57 
  -4   0  -3 4723.95  188.55 
  -5   0  -3 1464.54   65.35 
  -5   0  -3 1544.38   65.08 
  -5   0  -3 1491.84   65.13 
  -5   0  -3 1502.97   65.06 
  -6   0  -3 1205.78   54.98 
  -6   0  -3 1290.25   55.08 
  -6   0  -3 1328.05   55.52 
   6   0   3 1232.63   55.02 
  -7   0  -3  969.17   41.07 
  -7   0  -3  917.45   39.81 
  -7   0  -3  882.06   40.40 
   7   0   3  910.61   40.29 
   7   0   3  912.95   40.31 
  -8   0  -3  440.67   20.84 
  -8   0  -3  439.03   19.71 
  -8   0  -3  440.23   19.68 
   8   0   3  443.28   20.10 
   8   0   3  442.67   20.34 
   8   0   3  439.67   20.02 
  -9   0  -3  310.35   15.35 
  -9   0  -3  303.47   13.94 
  -9   0  -3  275.66   13.73 
   9   0   3  289.26   14.24 
   9   0   3  288.41   14.12 
   9   0   3  311.42   14.17 
 -10   0  -3  110.99    6.75 
 -10   0  -3  107.25    8.29 
  10   0   3  108.01    6.90 
  10   0   3  110.83    7.45 
  10   0   3  107.08    6.79 
 -11   0  -3   94.46    6.46 
  11   0   3   86.23    7.14 
  11   0   3   73.04    6.39 
  10  -1  -3  189.09   11.41 
  10  -1  -3  189.10   12.01 
 -10   1   3  217.10   14.31 
 -10   1   3  216.28   13.56 
   9  -1  -3  445.97   21.07 
   9  -1  -3  422.12   21.08 
  -9   1   3  468.44   23.31 
  -9   1   3  431.60   22.49 
   8  -1  -3  480.68   21.76 
   8  -1  -3  441.40   21.91 
  -8   1   3  472.59   23.53 
  -8   1   3  464.49   22.94 
   7  -1  -3  258.79   12.74 
   7  -1  -3  245.50   12.93 
   7  -1  -3  267.78   12.08 
  -7   1   3  260.41   13.50 
  -7   1   3  259.25   14.59 
   6  -1  -3  694.33   30.97 
   6  -1  -3  699.81   31.05 
   6  -1  -3  718.06   30.53 
  -6   1   3  647.45   32.22 
  -6   1   3  710.17   31.71 
   5  -1  -3  235.60   11.82 
   5  -1  -3  205.64   10.87 
   5  -1  -3  211.98   10.99 
   5  -1  -3  220.43   10.49 
  -5   1   3  258.52   11.84 
  -5   1   3  219.38   12.14 
  -5   1   3  251.12   12.69 
   4  -1  -3  337.33   14.44 
   4  -1  -3  339.73   14.77 
   4  -1  -3  316.75   15.65 
   4  -1  -3  326.37   14.70 
  -4   1   3  298.98   15.99 
  -4   1   3  321.46   15.82 
  -4   1   3  311.13   15.20 
   3  -1  -3  109.50    5.43 
   3  -1  -3  105.41    5.10 
   3  -1  -3  107.14    5.23 
  -3   1   3   93.15    5.70 
  -3   1   3   94.27    6.56 
  -3   1   3  106.33    6.43 
  -3   1   3  109.35    5.16 
   2  -1  -3  593.00   26.07 
   2  -1  -3  593.87   26.16 
   2  -1  -3  586.03   27.20 
   2  -1  -3  607.94   26.24 
  -2   1   3  626.22   26.44 
  -2   1   3  587.26   26.11 
  -2   1   3  550.92   26.96 
  -2   1   3  635.16   27.30 
   1  -1  -3 1873.50   78.18 
   1  -1  -3 1750.27   77.32 
   1  -1  -3 1651.92   77.46 
   1  -1  -3 1839.38   78.34 
   1  -1  -3 1829.10   77.38 
   1  -1  -3 1732.97   77.44 
  -1   1   3 1892.15   77.70 
  -1   1   3 1822.53   78.31 
  -1   1   3 1774.19   77.47 
  -1   1   3 1818.44   77.33 
  -1   1   3 1749.46   78.12 
  -1   1   3 1792.62   77.40 
   0  -1  -3  640.80   29.60 
   0  -1  -3  600.65   30.04 
   0  -1  -3  701.67   29.60 
   0  -1  -3  703.74   29.51 
   0  -1  -3  669.51   30.24 
   0  -1  -3  701.12   29.41 
   0   1   3  684.57   29.59 
   0   1   3  719.40   29.63 
   0   1   3  639.96   30.17 
   0   1   3  643.74   29.43 
   0   1   3  739.70   30.25 
   0   1   3  703.85   29.38 
  -1  -1  -3 8334.38  343.92 
  -1  -1  -3 8007.33  340.86 
  -1  -1  -3 7157.35  339.92 
  -1  -1  -3 8625.74  341.26 
  -1  -1  -3 7373.56  342.56 
  -1  -1  -3 6958.67  339.59 
   1   1   3 7799.31  339.98 
   1   1   3 7849.03  339.42 
   1   1   3 8202.90  340.64 
   1   1   3 8288.95  340.90 
   1   1   3 8235.42  343.69 
  -2  -1  -3 2856.47  114.02 
  -2  -1  -3 2525.75  111.97 
  -2  -1  -3 2411.18  112.11 
  -2  -1  -3 2516.89  113.03 
   2   1   3 2602.90  112.69 
   2   1   3 2687.29  112.38 
   2   1   3 2617.85  111.98 
  -3  -1  -3 2366.88   95.61 
  -3  -1  -3 2202.85   95.87 
  -3  -1  -3 2114.11   96.61 
  -3  -1  -3 2104.50   95.67 
   3   1   3 2335.22   95.60 
   3   1   3 2035.85   95.66 
   3   1   3 2247.56   95.78 
   3   1   3 2358.70   95.82 
  -4  -1  -3 2018.81   89.45 
   4   1   3 2129.24   89.45 
  -5  -1  -3 1543.20   68.67 
  -5  -1  -3 1547.82   68.89 
  -5  -1  -3 1548.87   68.53 
  -5  -1  -3 1696.36   68.61 
  -6  -1  -3  361.44   15.99 
  -6  -1  -3  356.29   16.46 
   6   1   3  347.77   15.85 
   6   1   3  344.25   15.92 
  -7  -1  -3  300.83   15.33 
  -7  -1  -3  312.24   14.19 
   7   1   3  332.31   14.70 
   7   1   3  325.50   14.64 
   7   1   3  330.11   14.89 
  -8  -1  -3  300.06   13.78 
  -8  -1  -3  323.05   15.10 
  -8  -1  -3  282.46   13.68 
   8   1   3  310.00   14.05 
   8   1   3  301.00   13.97 
   8   1   3  300.31   14.32 
   9   1   3  239.39   12.34 
   9   1   3  247.93   11.96 
   9   1   3  250.56   11.83 
 -10  -1  -3  228.59   11.49 
  10   1   3  238.28   11.64 
  10   1   3  227.20   13.14 
  10   1   3  229.72   11.47 
  10   1   3  233.14   12.15 
 -11  -1  -3  275.62   13.14 
  11   1   3  250.87   13.35 
  11   1   3  252.19   14.91 
  11   1   3  260.14   13.50 
  10  -2  -3  356.46   18.11 
  10  -2  -3  370.03   17.75 
 -10   2   3  341.41   19.34 
 -10   2   3  335.30   19.97 
   9  -2  -3  112.47    8.19 
   9  -2  -3  112.65    7.86 
  -9   2   3  116.65   10.15 
  -9   2   3  106.44    9.35 
   8  -2  -3  312.65   15.66 
   8  -2  -3  307.00   15.59 
   8  -2  -3  327.11   15.01 
  -8   2   3  316.97   16.94 
  -8   2   3  332.07   17.81 
   7  -2  -3  995.37   43.22 
   7  -2  -3  977.85   43.00 
   7  -2  -3 1007.05   42.62 
  -7   2   3  969.79   44.01 
  -7   2   3  898.85   44.48 
   6  -2  -3  163.77    8.75 
   6  -2  -3  170.31    8.18 
   6  -2  -3  151.68    8.47 
  -6   2   3  179.90    9.42 
  -6   2   3  165.29   10.14 
   5  -2  -3  785.71   34.18 
   5  -2  -3  801.70   34.44 
   5  -2  -3  774.12   34.47 
   5  -2  -3  721.24   35.24 
  -5   2   3  834.87   35.85 
  -5   2   3  754.04   35.93 
   4  -2  -3  969.31   41.37 
   4  -2  -3  848.48   42.28 
   4  -2  -3  978.01   41.17 
   4  -2  -3  934.17   41.29 
  -4   2   3  967.81   42.74 
  -4   2   3  968.08   42.43 
  -4   2   3  935.89   41.83 
   3  -2  -3 1668.35   70.35 
   3  -2  -3 1496.69   71.47 
   3  -2  -3 1562.88   70.37 
   3  -2  -3 1672.20   70.49 
  -3   2   3 1603.21   71.36 
  -3   2   3 1567.65   71.60 
  -3   2   3 1810.50   70.95 
   2  -2  -3 1912.54   81.00 
   2  -2  -3 1903.22   81.11 
   2  -2  -3 2016.26   81.08 
   2  -2  -3 1852.76   82.13 
  -2   2   3 1883.63   81.93 
  -2   2   3 1771.75   81.30 
  -2   2   3 1791.37   82.11 
   1  -2  -3  813.35   34.90 
   1  -2  -3  887.79   34.95 
   1  -2  -3  757.38   35.57 
   1  -2  -3  840.07   35.85 
   1  -2  -3  827.11   35.12 
   1  -2  -3  801.06   34.76 
  -1   2   3  825.05   35.15 
  -1   2   3  721.30   34.98 
  -1   2   3  805.66   35.64 
  -1   2   3  738.48   35.70 
   0  -2  -3 1862.22   80.16 
   0  -2  -3 1886.47   79.92 
   0  -2  -3 1911.64   80.23 
   0  -2  -3 2004.46   80.34 
   0  -2  -3 1768.65   80.83 
   0  -2  -3 1742.29   79.90 
   0   2   3 1805.70   80.18 
   0   2   3 1781.82   80.20 
   0   2   3 1807.92   80.73 
   0   2   3 2009.92   80.17 
  -1  -2  -3 9177.27  390.19 
  -1  -2  -3 9999.00  389.51 
  -1  -2  -3 8690.61  387.21 
  -1  -2  -3 8387.17  386.83 
   1   2   3 8706.02  387.05 
   1   2   3 8830.81  386.31 
  -2  -2  -3  538.03   22.85 
  -2  -2  -3  556.63   22.96 
  -2  -2  -3  488.86   23.09 
  -2  -2  -3  539.92   22.70 
  -2  -2  -3  512.22   23.11 
   2   2   3  493.72   23.00 
   2   2   3  533.21   22.92 
   2   2   3  521.36   22.80 
   2   2   3  571.02   23.36 
   2   2   3  518.92   22.42 
   2   2   3  517.85   22.68 
   2   2   3  464.05   22.41 
  -3  -2  -3 2090.35   93.62 
  -3  -2  -3 1988.33   93.59 
  -3  -2  -3 2373.50   94.46 
   3   2   3 2079.87   93.34 
   3   2   3 2195.31   93.27 
   3   2   3 2226.49   93.61 
   3   2   3 2224.98   93.25 
  -4  -2  -3 1793.94   87.08 
  -4  -2  -3 1884.38   86.75 
  -4  -2  -3 2136.57   87.42 
  -4  -2  -3 1976.52   87.03 
   4   2   3 2074.19   87.17 
   4   2   3 2160.66   86.79 
   4   2   3 2069.27   86.80 
  -5  -2  -3   26.29    2.07 
  -5  -2  -3   28.49    1.90 
  -5  -2  -3   21.93    1.71 
   5   2   3   22.53    2.26 
   5   2   3   24.48    2.22 
  -6  -2  -3 1659.65   76.79 
   6   2   3 1780.99   77.09 
   6   2   3 1841.34   76.94 
   6   2   3 1840.54   77.62 
  -7  -2  -3  139.47    6.33 
  -7  -2  -3  121.09    6.01 
  -7  -2  -3  111.07    5.87 
   7   2   3  120.01    7.24 
   7   2   3  122.01    6.24 
   7   2   3  120.73    6.29 
  -8  -2  -3  111.67    5.78 
  -8  -2  -3  107.07    5.85 
   8   2   3  111.39    6.45 
   8   2   3  110.10    6.05 
   8   2   3  109.56    7.31 
   8   2   3  112.39    5.93 
  -9  -2  -3  279.83   12.55 
  -9  -2  -3  233.75   12.40 
   9   2   3  254.97   12.34 
   9   2   3  259.63   13.56 
   9   2   3  285.15   13.13 
   9   2   3  268.14   12.50 
 -10  -2  -3  313.92   15.07 
  10   2   3  327.53   15.72 
  10   2   3  322.06   16.70 
  10   2   3  306.83   14.98 
 -11  -2  -3  383.73   18.05 
  11   2   3  396.22   18.76 
  11   2   3  356.73   18.00 
  11   2   3  382.69   19.44 
   9  -3  -3  261.25   14.13 
   9  -3  -3  263.57   13.91 
  -9   3   3  266.18   15.81 
  -9   3   3  261.89   15.38 
   8  -3  -3  463.44   22.05 
   8  -3  -3  455.14   21.70 
   8  -3  -3  450.21   21.26 
  -8   3   3  500.22   23.33 
  -8   3   3  462.51   23.89 
   7  -3  -3  146.66    8.32 
   7  -3  -3  143.56    8.37 
   7  -3  -3  140.52    7.60 
  -7   3   3  152.62   10.33 
  -7   3   3  131.34    9.38 
   6  -3  -3  461.82   21.16 
   6  -3  -3  459.33   21.39 
   6  -3  -3  474.15   21.42 
  -6   3   3  455.40   22.96 
  -6   3   3  492.22   22.31 
   5  -3  -3  996.69   43.85 
   5  -3  -3  971.52   45.94 
   5  -3  -3  961.98   43.74 
   5  -3  -3  995.18   43.64 
  -5   3   3  951.08   44.50 
  -5   3   3  973.47   45.36 
  -5   3   3 1115.48   45.32 
   4  -3  -3  953.14   41.31 
   4  -3  -3  955.35   42.62 
   4  -3  -3  940.65   41.18 
   4  -3  -3  948.75   41.22 
  -4   3   3  923.94   41.86 
  -4   3   3  900.89   42.64 
  -4   3   3  958.15   42.45 
   3  -3  -3 1550.35   63.74 
   3  -3  -3 1505.79   63.68 
   3  -3  -3 1307.97   64.78 
   3  -3  -3 1416.80   63.71 
  -3   3   3 1584.89   64.92 
  -3   3   3 1419.35   64.15 
  -3   3   3 1486.88   65.07 
   2  -3  -3 3680.17  154.42 
   2  -3  -3 3253.72  155.36 
   2  -3  -3 3811.74  154.46 
  -2   3   3 3627.72  154.75 
  -2   3   3 3641.64  154.29 
  -2   3   3 3230.40  155.18 
  -2   3   3 3843.01  155.67 
   1  -3  -3 3833.76  156.10 
   1  -3  -3 3593.37  154.99 
   1  -3  -3 3552.53  155.05 
   1  -3  -3 3447.50  154.84 
   1  -3  -3 3438.22  156.24 
  -1   3   3 3962.44  156.17 
  -1   3   3 3204.57  154.79 
  -1   3   3 3560.54  155.26 
  -1   3   3 3811.19  155.91 
   0  -3  -3 1684.49   75.51 
   0  -3  -3 1808.45   74.92 
   0  -3  -3 1665.24   74.53 
   0  -3  -3 1689.81   75.11 
   0  -3  -3 1699.87   74.73 
   0  -3  -3 1707.35   75.63 
   0   3   3 1784.13   74.72 
   0   3   3 1749.46   75.52 
   0   3   3 1714.71   74.52 
   0   3   3 1699.45   74.98 
   0   3   3 1845.19   75.72 
  -1  -3  -3 2968.06  122.84 
  -1  -3  -3 2717.67  122.63 
  -1  -3  -3 3021.63  122.45 
  -1  -3  -3 3051.09  122.65 
  -1  -3  -3 2877.59  123.12 
  -1  -3  -3 2739.06  123.14 
   1   3   3 2780.76  122.66 
   1   3   3 2652.48  122.99 
   1   3   3 2915.02  122.35 
   1   3   3 2714.07  122.35 
  -2  -3  -3  486.03   21.43 
  -2  -3  -3  467.19   20.68 
  -2  -3  -3  473.75   20.98 
  -2  -3  -3  476.53   21.09 
  -2  -3  -3  458.44   21.29 
   2   3   3  496.87   21.29 
   2   3   3  461.10   20.40 
   2   3   3  464.05   20.99 
   2   3   3  480.07   20.66 
  -3  -3  -3  643.53   30.08 
  -3  -3  -3  658.48   29.43 
  -3  -3  -3  632.77   29.99 
  -3  -3  -3  720.61   29.93 
   3   3   3  647.55   29.46 
   3   3   3  729.54   29.39 
   3   3   3  698.61   29.44 
   3   3   3  697.51   29.93 
   3   3   3  691.60   29.83 
  -4  -3  -3  485.64   22.57 
  -4  -3  -3  526.45   22.20 
  -4  -3  -3  499.11   22.74 
  -4  -3  -3  506.84   22.67 
   4   3   3  520.23   22.30 
   4   3   3  543.95   22.24 
   4   3   3  519.40   22.80 
   4   3   3  472.63   22.18 
  -5  -3  -3  762.50   34.38 
  -5  -3  -3  758.53   34.02 
  -5  -3  -3  775.56   34.45 
   5   3   3  806.76   34.07 
   5   3   3  820.10   34.75 
   5   3   3  781.53   34.22 
  -6  -3  -3   50.75    3.35 
  -6  -3  -3   50.54    3.30 
  -6  -3  -3   50.34    3.49 
   6   3   3   49.04    4.17 
   6   3   3   52.66    3.39 
   6   3   3   49.81    2.99 
  -7  -3  -3  297.37   13.71 
  -7  -3  -3  291.80   13.70 
  -7  -3  -3  307.72   13.61 
   7   3   3  285.96   13.83 
   7   3   3  291.66   13.40 
   7   3   3  296.60   14.51 
  -8  -3  -3 2168.75   92.72 
  -8  -3  -3 2106.84   92.69 
   8   3   3 2137.81   92.86 
   8   3   3 2160.70   93.54 
   8   3   3 2106.92   92.41 
  -9  -3  -3  330.91   16.09 
   9   3   3  358.92   15.89 
   9   3   3  348.86   17.09 
   9   3   3  340.52   15.77 
   9   3   3  342.07   16.41 
 -10  -3  -3  496.13   23.01 
  10   3   3  514.17   23.41 
  10   3   3  499.23   22.66 
  10   3   3  489.94   24.35 
 -11  -3  -3  503.60   23.02 
  11   3   3  488.73   23.47 
  11   3   3  482.46   24.56 
   9  -4  -3  153.16    9.68 
   9  -4  -3  149.95    9.75 
  -9   4   3  155.15   10.32 
  -9   4   3  141.55   11.87 
   8  -4  -3  293.66   15.24 
   8  -4  -3  312.99   15.79 
   8  -4  -3  324.29   15.93 
  -8   4   3  332.59   18.02 
  -8   4   3  313.99   17.08 
   7  -4  -3  300.31   14.78 
   7  -4  -3  288.59   14.27 
   7  -4  -3  292.79   14.48 
  -7   4   3  312.18   16.48 
  -7   4   3  296.10   15.88 
   6  -4  -3  634.96   29.12 
   6  -4  -3  621.55   28.93 
   6  -4  -3  638.07   29.04 
  -6   4   3  634.78   30.60 
  -6   4   3  701.37   30.15 
   5  -4  -3 1073.20   46.92 
   5  -4  -3 1071.34   46.87 
   5  -4  -3 1084.44   47.02 
  -5   4   3 1084.41   48.42 
  -5   4   3 1020.88   47.64 
   4  -4  -3 1550.87   68.79 
   4  -4  -3 1614.92   68.82 
   4  -4  -3 1397.07   69.94 
  -4   4   3 1665.07   70.20 
  -4   4   3 1607.54   70.41 
  -4   4   3 1579.14   69.46 
  -4   4   3 1653.38   68.80 
   3  -4  -3  380.66   17.27 
   3  -4  -3  367.22   17.22 
   3  -4  -3  362.41   18.50 
  -3   4   3  390.35   18.50 
  -3   4   3  351.88   18.52 
  -3   4   3  429.41   17.22 
  -3   4   3  378.30   17.80 
   2  -4  -3  762.79   34.78 
   2  -4  -3  815.28   34.92 
   2  -4  -3  858.56   36.22 
  -2   4   3  756.18   35.19 
  -2   4   3  806.55   35.93 
  -2   4   3  808.40   36.12 
  -2   4   3  752.78   34.65 
   1  -4  -3  719.06   30.71 
   1  -4  -3  685.93   30.50 
   1  -4  -3  754.88   31.89 
  -1   4   3  715.85   30.38 
  -1   4   3  652.90   31.63 
  -1   4   3  723.97   31.01 
  -1   4   3  631.43   31.42 
   0  -4  -3 2161.62  101.13 
   0  -4  -3 2609.32  101.46 
   0  -4  -3 2311.02  102.25 
   0  -4  -3 2373.68  102.17 
   0  -4  -3 2403.13  101.04 
   0   4   3 2082.53  102.10 
   0   4   3 2442.80  101.00 
   0   4   3 2271.70  102.08 
   0   4   3 2467.26  101.65 
  -1  -4  -3   27.08    2.56 
  -1  -4  -3   29.71    2.13 
  -1  -4  -3   32.20    3.12 
  -1  -4  -3   37.95    3.54 
  -1  -4  -3   37.72    1.93 
   1   4   3   28.80    1.93 
   1   4   3   34.79    1.77 
   1   4   3   39.27    2.98 
   1   4   3   34.81    3.16 
  -2  -4  -3  441.46   20.83 
  -2  -4  -3  447.17   19.66 
  -2  -4  -3  448.18   20.73 
  -2  -4  -3  454.65   20.20 
  -2  -4  -3  466.73   19.84 
   2   4   3  458.70   20.42 
   2   4   3  465.37   19.64 
   2   4   3  435.91   19.71 
   2   4   3  462.14   20.64 
  -3  -4  -3  395.77   17.03 
  -3  -4  -3  396.56   17.63 
  -3  -4  -3  347.16   16.98 
  -3  -4  -3  395.06   17.99 
  -3  -4  -3  370.54   18.04 
   3   4   3  398.47   17.76 
   3   4   3  418.66   17.12 
   3   4   3  394.87   17.78 
   3   4   3  402.94   17.03 
  -4  -4  -3  603.99   27.55 
  -4  -4  -3  618.74   27.99 
  -4  -4  -3  626.69   27.90 
   4   4   3  614.42   27.42 
   4   4   3  619.24   27.22 
   4   4   3  641.41   27.12 
   4   4   3  613.67   27.00 
   4   4   3  647.90   27.87 
  -5  -4  -3  918.52   41.71 
  -5  -4  -3  906.34   41.62 
  -5  -4  -3 1035.06   41.44 
   5   4   3  928.15   41.16 
   5   4   3  894.93   40.86 
   5   4   3  979.89   40.84 
   5   4   3  956.48   41.80 
  -6  -4  -3  909.82   37.53 
  -6  -4  -3  770.12   37.79 
   6   4   3  895.03   37.52 
   6   4   3  837.30   38.08 
   6   4   3  863.70   37.07 
  -7  -4  -3 1163.25   53.92 
  -7  -4  -3 1252.12   54.42 
  -7  -4  -3 1239.24   54.44 
   7   4   3 1273.55   54.17 
   7   4   3 1250.80   53.66 
   7   4   3 1250.82   54.87 
  -8  -4  -3  612.17   29.33 
  -8  -4  -3  643.18   29.97 
  -8  -4  -3  657.90   29.95 
   8   4   3  683.33   29.83 
   8   4   3  705.30   30.74 
   8   4   3  691.93   29.24 
  -9  -4  -3  887.62   41.60 
   9   4   3  954.58   42.40 
   9   4   3  958.18   41.60 
   9   4   3  938.07   40.90 
 -10  -4  -3  207.04   11.13 
  10   4   3  204.06   11.13 
  10   4   3  208.31   11.82 
 -11  -4  -3  284.40   14.96 
  11   4   3  301.79   16.51 
  11   4   3  299.35   15.18 
   9  -5  -3  274.96   14.66 
   9  -5  -3  264.95   14.12 
  -9   5   3  288.45   16.38 
  -9   5   3  264.72   16.57 
   8  -5  -3  582.03   28.43 
   8  -5  -3  594.25   28.65 
   8  -5  -3  582.55   28.29 
  -8   5   3  642.27   30.94 
  -8   5   3  704.38   30.43 
   7  -5  -3  165.88    9.23 
   7  -5  -3  165.88    9.65 
   7  -5  -3  176.33    9.75 
  -7   5   3  159.99   11.30 
  -7   5   3  182.47   10.51 
   6  -5  -3  570.55   25.52 
   6  -5  -3  543.13   25.71 
   6  -5  -3  558.73   25.60 
  -6   5   3  586.95   27.58 
  -6   5   3  550.64   26.80 
   5  -5  -3   77.53    5.45 
   5  -5  -3   77.00    5.25 
  -5   5   3   79.09    5.30 
  -5   5   3   78.77    6.51 
  -5   5   3   74.40    7.00 
   4  -5  -3  601.56   26.71 
   4  -5  -3  567.93   26.61 
  -4   5   3  577.56   26.62 
  -4   5   3  609.50   28.34 
  -4   5   3  625.95   27.59 
   3  -5  -3  966.67   41.53 
   3  -5  -3  904.39   39.89 
   3  -5  -3  928.26   39.99 
  -3   5   3  848.32   40.42 
  -3   5   3  953.29   41.35 
  -3   5   3  913.71   39.79 
  -3   5   3  837.76   41.30 
   2  -5  -3  190.93   10.50 
   2  -5  -3  174.28    8.87 
   2  -5  -3  188.77    9.14 
  -2   5   3  201.06   10.57 
  -2   5   3  174.36    8.69 
  -2   5   3  165.34    9.30 
  -2   5   3  205.33   10.44 
   1  -5  -3 1016.77   47.24 
   1  -5  -3 1025.32   45.87 
   1  -5  -3 1051.51   46.13 
  -1   5   3 1054.69   45.75 
  -1   5   3 1074.46   47.09 
  -1   5   3 1059.68   47.32 
  -1   5   3 1097.47   46.54 
   0  -5  -3   25.48    1.91 
   0  -5  -3   25.60    3.72 
   0  -5  -3   25.62    2.65 
   0   5   3   25.77    3.48 
   0   5   3   25.39    1.90 
   0   5   3   26.85    3.12 
  -1  -5  -3  200.59    9.86 
  -1  -5  -3  165.35    8.64 
  -1  -5  -3  178.63    8.18 
  -1  -5  -3  167.68    8.17 
  -1  -5  -3  186.33    9.53 
   1   5   3  172.62    9.02 
   1   5   3  174.10    9.38 
   1   5   3  179.01    8.04 
   1   5   3  189.19    8.10 
  -2  -5  -3 1063.82   49.63 
  -2  -5  -3 1117.93   49.56 
  -2  -5  -3 1075.61   48.81 
  -2  -5  -3 1156.54   48.43 
  -2  -5  -3 1134.51   48.40 
   2   5   3 1165.48   48.29 
   2   5   3 1127.85   49.43 
   2   5   3 1108.21   49.13 
   2   5   3 1113.08   48.23 
  -3  -5  -3  252.12   12.24 
  -3  -5  -3  267.17   11.68 
   3   5   3  266.84   12.46 
   3   5   3  259.65   11.43 
   3   5   3  269.26   11.69 
   3   5   3  262.49   12.62 
  -4  -5  -3  464.30   21.85 
  -4  -5  -3  464.57   22.39 
  -4  -5  -3  474.73   21.36 
  -4  -5  -3  518.71   22.70 
   4   5   3  486.71   21.04 
   4   5   3  504.24   22.20 
   4   5   3  510.45   21.50 
   4   5   3  480.22   22.01 
  -5  -5  -3 1283.81   54.66 
  -5  -5  -3 1271.13   55.23 
  -5  -5  -3 1128.51   55.15 
   5   5   3 1243.08   53.86 
   5   5   3 1292.28   53.92 
   5   5   3 1267.50   54.41 
   5   5   3 1274.86   55.13 
  -6  -5  -3  806.99   35.82 
  -6  -5  -3  800.16   35.84 
  -6  -5  -3  797.90   35.15 
   6   5   3  811.60   34.52 
   6   5   3  779.55   35.78 
   6   5   3  809.05   35.15 
   6   5   3  776.64   34.54 
  -7  -5  -3  542.32   25.76 
  -7  -5  -3  576.62   25.89 
  -7  -5  -3  569.61   25.01 
   7   5   3  579.15   26.13 
   7   5   3  559.03   24.51 
   7   5   3  540.68   25.17 
  -8  -5  -3  859.50   41.68 
  -8  -5  -3  997.39   42.77 
   8   5   3  936.19   42.17 
   8   5   3  966.37   43.02 
   8   5   3 1002.53   41.71 
  -9  -5  -3   28.07    4.74 
   9   5   3   26.58    4.37 
   9   5   3   27.17    4.05 
 -10  -5  -3  415.91   20.05 
  10   5   3  411.16   19.81 
  10   5   3  399.39   20.84 
 -11  -5  -3  176.95   10.69 
  11   5   3  183.68   10.51 
  11   5   3  170.11   11.93 
   8  -6  -3  103.62    7.81 
   8  -6  -3  105.34    7.81 
   8  -6  -3  100.63    7.11 
  -8   6   3   89.01   10.30 
  -8   6   3   99.67    9.37 
   7  -6  -3  553.98   26.68 
   7  -6  -3  589.53   26.80 
   7  -6  -3  561.14   26.73 
  -7   6   3  598.84   28.15 
  -7   6   3  605.55   29.13 
   6  -6  -3  209.13   10.88 
   6  -6  -3  190.73   10.56 
  -6   6   3  216.38   13.06 
  -6   6   3  216.00   12.36 
  -6   6   3  206.07   10.55 
   5  -6  -3  547.41   24.73 
   5  -6  -3  529.63   24.62 
  -5   6   3  529.65   25.54 
  -5   6   3  548.18   26.55 
  -5   6   3  551.22   24.66 
   4  -6  -3  100.86    6.21 
   4  -6  -3   98.01    6.04 
  -4   6   3  100.74    7.82 
  -4   6   3   94.05    7.05 
  -4   6   3   97.97    5.88 
   3  -6  -3  173.67    8.95 
   3  -6  -3  176.50    8.99 
   3  -6  -3  171.97   10.63 
  -3   6   3  183.94    9.66 
  -3   6   3  206.90   10.96 
  -3   6   3  161.72   10.69 
  -3   6   3  179.60    8.82 
   2  -6  -3  126.14    8.53 
   2  -6  -3  130.70    6.79 
   2  -6  -3  125.02    7.13 
  -2   6   3  139.49    8.57 
  -2   6   3  141.69    6.65 
  -2   6   3  127.60    7.72 
  -2   6   3  127.31    8.53 
   1  -6  -3  469.16   21.20 
   1  -6  -3  455.48   20.89 
   1  -6  -3  463.18   22.61 
  -1   6   3  457.06   22.23 
  -1   6   3  513.79   20.84 
  -1   6   3  455.64   21.63 
   0  -6  -3  426.16   18.58 
   0  -6  -3  400.69   20.23 
   0  -6  -3  402.89   18.91 
   0   6   3  443.04   20.04 
   0   6   3  411.98   18.46 
   0   6   3  423.46   19.40 
  -1  -6  -3 1237.82   51.76 
  -1  -6  -3 1095.69   51.31 
  -1  -6  -3 1165.04   49.93 
  -1  -6  -3 1123.83   50.39 
  -1  -6  -3 1230.22   50.09 
   1   6   3 1166.65   50.83 
   1   6   3 1026.89   51.13 
   1   6   3 1173.37   49.83 
  -2  -6  -3  769.38   36.32 
  -2  -6  -3  834.46   36.05 
  -2  -6  -3  873.80   37.64 
  -2  -6  -3  793.42   35.82 
   2   6   3  802.82   36.81 
   2   6   3  820.56   35.81 
   2   6   3  875.83   37.28 
   2   6   3  833.77   35.68 
  -3  -6  -3 2048.25   86.73 
  -3  -6  -3 1863.15   87.42 
  -3  -6  -3 2045.60   87.76 
  -3  -6  -3 2022.19   86.23 
   3   6   3 2099.90   87.37 
   3   6   3 1914.91   86.13 
   3   6   3 1990.98   87.08 
  -4  -6  -3  814.08   37.48 
  -4  -6  -3  816.90   37.62 
  -4  -6  -3  855.37   36.71 
   4   6   3  809.85   37.02 
   4   6   3  879.89   36.21 
   4   6   3  801.96   37.04 
  -5  -6  -3  429.44   19.79 
  -5  -6  -3  419.56   20.72 
  -5  -6  -3  427.68   20.60 
   5   6   3  453.61   20.42 
   5   6   3  440.28   19.42 
  -6  -6  -3  662.46   29.95 
  -6  -6  -3  660.18   29.88 
  -6  -6  -3  597.40   28.80 
   6   6   3  664.58   28.84 
   6   6   3  656.03   29.72 
  -7  -6  -3  258.39   13.08 
  -7  -6  -3  246.38   11.81 
   7   6   3  242.72   12.08 
   7   6   3  247.70   12.83 
  -8  -6  -3   66.41    6.17 
   8   6   3   65.46    5.65 
   8   6   3   72.56    5.36 
  -9  -6  -3  129.10    8.58 
   9   6   3  120.21    8.30 
   9   6   3  125.72    7.89 
 -10  -6  -3   16.67    3.98 
  10   6   3   15.25    3.43 
  10   6   3   26.19    5.30 
 -11  -6  -3    9.10    3.84 
  11   6   3   10.87    4.14 
  11   6   3   18.75    3.90 
   8  -7  -3  143.45    9.56 
   8  -7  -3  141.69    9.18 
   8  -7  -3  142.91    9.63 
  -8   7   3  155.24   10.59 
  -8   7   3  143.79   11.87 
   7  -7  -3   83.69    6.12 
   7  -7  -3   81.56    6.85 
   7  -7  -3   78.62    6.58 
  -7   7   3   84.58    8.67 
  -7   7   3   81.61    9.94 
   6  -7  -3   19.29    2.97 
   6  -7  -3   16.11    2.93 
  -6   7   3   16.08    4.79 
  -6   7   3   18.41    3.45 
  -6   7   3   15.00    5.49 
   5  -7  -3  367.18   17.83 
   5  -7  -3  361.37   17.96 
  -5   7   3  363.72   17.73 
  -5   7   3  415.69   20.22 
  -5   7   3  374.60   18.82 
   4  -7  -3  333.83   16.46 
   4  -7  -3  353.48   16.48 
  -4   7   3  386.55   17.85 
  -4   7   3  341.04   18.41 
  -4   7   3  337.88   16.32 
   3  -7  -3  297.02   15.37 
   3  -7  -3  311.76   15.07 
   3  -7  -3  383.51   21.55 
  -3   7   3  319.64   17.00 
  -3   7   3  341.08   14.92 
  -3   7   3  299.94   16.11 
   2  -7  -3  496.62   23.55 
   2  -7  -3  506.32   25.29 
   2  -7  -3  504.70   23.29 
  -2   7   3  497.68   23.22 
  -2   7   3  558.50   25.29 
  -2   7   3  560.11   24.48 
   1  -7  -3 1596.31   69.35 
   1  -7  -3 1577.24   69.71 
   1  -7  -3 1625.81   71.35 
  -1   7   3 1671.06   71.13 
  -1   7   3 1621.37   70.31 
  -1   7   3 1497.15   69.23 
   0  -7  -3  958.99   42.53 
   0  -7  -3  934.40   40.99 
   0  -7  -3  937.44   40.48 
   0   7   3  823.50   41.92 
   0   7   3  969.55   40.44 
   0   7   3  942.50   41.56 
  -1  -7  -3  517.98   23.64 
  -1  -7  -3  531.81   23.04 
  -1  -7  -3  508.16   25.06 
   1   7   3  556.32   23.05 
   1   7   3  534.03   24.15 
   1   7   3  489.91   24.62 
  -2  -7  -3 1102.91   49.35 
  -2  -7  -3 1067.48   51.38 
  -2  -7  -3 1245.77   51.54 
  -2  -7  -3 1145.47   50.18 
  -2  -7  -3 1087.24   49.46 
   2   7   3 1194.06   51.23 
   2   7   3 1128.47   49.54 
   2   7   3 1182.53   50.71 
  -3  -7  -3  933.09   41.44 
  -3  -7  -3  959.34   41.64 
  -3  -7  -3  854.13   40.20 
   3   7   3  949.86   39.68 
   3   7   3  870.05   40.98 
   3   7   3  900.06   40.82 
  -4  -7  -3 1008.77   45.98 
  -4  -7  -3 1024.11   44.92 
  -4  -7  -3  973.49   46.01 
   4   7   3 1037.29   44.36 
   4   7   3 1045.79   45.56 
   4   7   3 1022.94   45.46 
  -5  -7  -3  488.73   22.38 
  -5  -7  -3  500.91   23.67 
  -5  -7  -3  489.26   24.43 
   5   7   3  485.08   21.86 
   5   7   3  485.86   22.97 
  -6  -7  -3  216.08   12.73 
  -6  -7  -3  232.34   11.21 
   6   7   3  241.06   11.11 
   6   7   3  231.16   11.99 
  -7  -7  -3  100.68    7.81 
  -7  -7  -3  113.75    6.09 
   7   7   3  105.35    6.34 
   7   7   3  100.52    7.01 
  -8  -7  -3   49.16    5.95 
   8   7   3   40.33    5.04 
   8   7   3   48.28    4.71 
  -9  -7  -3  264.86   15.03 
   9   7   3  283.87   13.98 
   9   7   3  294.89   15.59 
 -10  -7  -3   98.80    8.47 
  10   7   3   92.78    8.91 
  10   7   3   92.43    6.93 
   7  -8  -3  180.55   11.07 
   7  -8  -3  180.44   10.96 
  -7   8   3  202.16   14.42 
  -7   8   3  197.18   12.19 
   6  -8  -3  384.24   19.25 
   6  -8  -3  391.05   19.17 
  -6   8   3  409.46   22.10 
  -6   8   3  409.25   20.40 
  -6   8   3  390.95   19.04 
   5  -8  -3  240.59   13.03 
   5  -8  -3  238.35   12.75 
  -5   8   3  256.71   15.30 
  -5   8   3  263.25   12.73 
  -5   8   3  256.01   13.86 
   4  -8  -3  485.67   22.10 
   4  -8  -3  491.46   22.60 
  -4   8   3  492.83   22.15 
  -4   8   3  438.43   23.13 
  -4   8   3  498.33   24.57 
   3  -8  -3  543.16   24.20 
   3  -8  -3  520.71   23.73 
  -3   8   3  475.92   24.64 
  -3   8   3  531.71   23.64 
  -3   8   3  538.76   26.01 
   2  -8  -3  976.62   41.63 
   2  -8  -3  875.20   39.45 
   2  -8  -3  895.45   39.01 
  -2   8   3  834.73   38.87 
  -2   8   3  875.55   41.00 
  -2   8   3  848.04   40.10 
   1  -8  -3  321.50   14.78 
   1  -8  -3  306.34   16.72 
   1  -8  -3  297.58   14.23 
  -1   8   3  326.06   15.50 
  -1   8   3  307.13   16.41 
  -1   8   3  301.87   14.27 
   0  -8  -3 1307.21   58.13 
   0  -8  -3 1482.87   60.77 
   0  -8  -3 1284.08   58.69 
   0   8   3 1249.32   59.93 
   0   8   3 1404.43   58.15 
   0   8   3 1299.44   59.32 
  -1  -8  -3  536.66   24.15 
  -1  -8  -3  510.68   24.72 
  -1  -8  -3  613.82   26.92 
   1   8   3  510.27   24.14 
   1   8   3  567.00   26.25 
   1   8   3  558.71   25.61 
  -2  -8  -3  740.64   33.01 
  -2  -8  -3  625.18   30.67 
  -2  -8  -3  684.59   31.20 
  -2  -8  -3  688.87   30.35 
   2   8   3  695.91   32.37 
   2   8   3  719.74   30.53 
   2   8   3  723.24   31.83 
  -3  -8  -3  335.08   15.51 
  -3  -8  -3  339.33   17.20 
   3   8   3  308.05   15.97 
   3   8   3  322.41   16.47 
   3   8   3  329.44   14.75 
  -4  -8  -3  365.89   19.25 
  -4  -8  -3  384.24   17.77 
   4   8   3  378.63   18.35 
   4   8   3  389.86   17.12 
  -5  -8  -3   55.83    6.14 
  -5  -8  -3   44.82    4.53 
   5   8   3   51.84    5.56 
   5   8   3   54.77    3.71 
  -6  -8  -3  542.24   27.20 
  -6  -8  -3  568.54   25.82 
   6   8   3  584.84   26.78 
   6   8   3  574.60   25.43 
  -7  -8  -3  673.37   32.21 
  -7  -8  -3  736.96   34.11 
   7   8   3  753.72   33.53 
   7   8   3  730.77   32.29 
  -8  -8  -3  185.53   12.20 
   8   8   3  200.98   10.37 
   8   8   3  202.37   11.98 
  -9  -8  -3  423.61   21.67 
   9   8   3  407.16   20.21 
   9   8   3  422.94   21.09 
 -10  -8  -3  286.61   16.43 
  10   8   3  275.15   15.65 
   6  -9  -3  388.15   19.05 
   6  -9  -3  389.35   19.31 
  -6   9   3  424.61   19.05 
  -6   9   3  375.00   21.77 
  -6   9   3  369.41   20.23 
   5  -9  -3  512.30   24.66 
   5  -9  -3  542.74   25.25 
  -5   9   3  517.64   27.47 
  -5   9   3  572.86   26.39 
  -5   9   3  536.48   24.78 
   4  -9  -3  522.80   24.29 
   4  -9  -3  506.06   23.81 
  -4   9   3  481.16   23.65 
  -4   9   3  521.65   26.46 
  -4   9   3  559.15   25.61 
   3  -9  -3  854.08   38.47 
   3  -9  -3  835.41   38.07 
  -3   9   3  921.14   39.72 
  -3   9   3  817.52   40.38 
  -3   9   3  858.67   38.02 
   2  -9  -3  748.70   34.17 
   2  -9  -3  749.12   33.72 
  -2   9   3  762.12   36.13 
  -2   9   3  776.53   33.75 
  -2   9   3  753.67   35.14 
   1  -9  -3  626.31   31.14 
   1  -9  -3  621.13   29.09 
  -1   9   3  634.46   30.62 
  -1   9   3  670.55   29.89 
  -1   9   3  645.51   28.45 
   0  -9  -3   99.53    6.22 
   0  -9  -3   97.32    5.67 
   0  -9  -3  117.42    9.07 
   0   9   3  104.06    7.67 
   0   9   3   94.32    7.53 
   0   9   3  113.82    5.66 
  -1  -9  -3  193.07    9.50 
  -1  -9  -3  197.45   12.55 
  -1  -9  -3  179.81   10.13 
   1   9   3  196.38   12.01 
   1   9   3  222.91   11.54 
   1   9   3  225.76    9.72 
  -2  -9  -3  403.32   20.53 
  -2  -9  -3  380.72   18.42 
  -2  -9  -3  376.07   17.38 
   2   9   3  414.02   17.69 
   2   9   3  384.14   19.03 
   2   9   3  394.62   19.87 
  -3  -9  -3  202.92   12.70 
  -3  -9  -3  201.01   10.65 
   3   9   3  204.04   11.24 
   3   9   3  217.62    9.85 
  -4  -9  -3  147.75    8.36 
  -4  -9  -3  154.24   10.46 
   4   9   3  153.82    7.56 
   4   9   3  145.69    8.96 
  -5  -9  -3  473.42   22.37 
  -5  -9  -3  402.60   20.28 
   5   9   3  425.84   21.24 
   5   9   3  431.69   19.62 
  -6  -9  -3  488.25   23.86 
  -6  -9  -3  444.30   21.65 
   6   9   3  453.43   22.70 
   6   9   3  474.32   21.17 
  -7  -9  -3  362.82   19.55 
   7   9   3  363.07   16.88 
   7   9   3  356.22   18.62 
  -8  -9  -3  438.94   22.85 
   8   9   3  451.06   22.49 
  -9  -9  -3  681.74   33.69 
   9   9   3  704.46   33.31 
   6 -10  -3  448.94   21.97 
   6 -10  -3  454.67   21.69 
  -6  10   3  425.40   25.08 
  -6  10   3  488.26   23.96 
  -6  10   3  424.46   21.42 
   5 -10  -3  499.06   22.98 
   5 -10  -3  497.41   23.43 
  -5  10   3  461.94   22.74 
  -5  10   3  504.54   24.90 
  -5  10   3  464.69   25.86 
   4 -10  -3  130.33    8.00 
   4 -10  -3  134.13    8.87 
  -4  10   3  128.30   11.16 
  -4  10   3  129.57    7.80 
  -4  10   3  123.71    9.11 
   3 -10  -3  748.54   32.42 
   3 -10  -3  746.79   32.88 
  -3  10   3  664.69   34.90 
  -3  10   3  697.00   34.01 
  -3  10   3  734.12   32.32 
   2 -10  -3   71.81    5.17 
   2 -10  -3   72.30    5.53 
  -2  10   3   70.03    7.41 
  -2  10   3   70.62    5.10 
  -2  10   3   78.21    8.51 
   1 -10  -3  177.65    9.81 
   1 -10  -3  165.46    8.82 
  -1  10   3  164.20   11.66 
  -1  10   3  169.77   10.83 
  -1  10   3  172.33    8.70 
   0 -10  -3  732.98   30.70 
   0 -10  -3  689.07   29.68 
   0 -10  -3  635.44   32.63 
   0  10   3  629.24   29.64 
   0  10   3  688.87   31.49 
   0  10   3  644.92   32.25 
  -1 -10  -3  246.94   14.98 
  -1 -10  -3  251.13   12.68 
  -1 -10  -3  246.15   11.46 
   1  10   3  254.28   11.70 
   1  10   3  217.21   12.94 
   1  10   3  257.64   14.49 
  -2 -10  -3  396.01   20.12 
  -2 -10  -3  456.43   22.71 
   2  10   3  426.80   20.87 
   2  10   3  431.97   19.33 
  -3 -10  -3  558.14   26.00 
  -3 -10  -3  579.59   28.32 
   3  10   3  570.67   25.15 
   3  10   3  548.03   26.89 
  -4 -10  -3  649.00   30.37 
  -4 -10  -3  610.31   28.04 
   4  10   3  583.56   27.15 
   4  10   3  605.60   29.03 
  -5 -10  -3  464.73   22.68 
  -5 -10  -3  515.14   25.09 
   5  10   3  484.12   23.64 
   5  10   3  482.06   21.97 
  -6 -10  -3  472.34   25.04 
  -6 -10  -3  482.53   22.70 
   6  10   3  495.02   24.01 
  -7 -10  -3  495.98   25.27 
   7  10   3  480.64   24.32 
  -8 -10  -3  112.81   10.83 
   8  10   3  120.00    9.79 
  -9 -10  -3  189.87   13.86 
   9  10   3  199.59   13.08 
   5 -11  -3  282.43   14.61 
   5 -11  -3  297.50   15.39 
  -5  11   3  258.66   14.33 
  -5  11   3  296.00   16.99 
  -5  11   3  272.97   18.17 
   4 -11  -3   24.48    3.97 
   4 -11  -3   26.16    4.75 
  -4  11   3   28.48    6.08 
  -4  11   3   23.39    6.46 
  -4  11   3   16.00    3.50 
   3 -11  -3  216.01   11.75 
   3 -11  -3  220.12   11.36 
  -3  11   3  206.61   14.74 
  -3  11   3  228.03   13.75 
  -3  11   3  214.88   11.27 
   2 -11  -3   96.11    6.54 
   2 -11  -3  117.69    7.27 
  -2  11   3  106.42    6.60 
  -2  11   3  111.14    9.17 
  -2  11   3  103.44   10.13 
   1 -11  -3  261.94   12.78 
   1 -11  -3  271.33   13.86 
  -1  11   3  249.13   12.79 
  -1  11   3  248.90   15.90 
  -1  11   3  279.65   14.52 
   0 -11  -3  493.07   23.00 
   0  11   3  480.54   23.96 
   0  11   3  477.44   21.92 
  -1 -11  -3  584.90   30.26 
  -1 -11  -3  604.33   27.63 
   1  11   3  592.46   26.76 
   1  11   3  615.51   28.81 
  -2 -11  -3  744.66   33.98 
  -2 -11  -3  749.39   36.51 
   2  11   3  716.42   34.64 
   2  11   3  766.94   33.06 
  -3 -11  -3  539.81   26.54 
  -3 -11  -3  467.67   23.60 
   3  11   3  527.24   22.80 
   3  11   3  481.47   24.75 
  -4 -11  -3  747.44   36.71 
  -4 -11  -3  771.73   34.29 
   4  11   3  733.24   35.28 
  -5 -11  -3  440.59   21.99 
  -5 -11  -3  493.12   24.76 
   5  11   3  456.69   23.38 
  -6 -11  -3  465.87   24.69 
   6  11   3  446.36   23.26 
  -7 -11  -3  133.11   11.33 
   7  11   3  123.87   10.33 
  -8 -11  -3  420.92   22.65 
   8  11   3  392.22   21.65 
   3 -12  -3  137.45    9.47 
   3 -12  -3  123.23    8.11 
  -3  12   3  137.01   11.02 
  -3  12   3  134.49    8.14 
   2 -12  -3  278.73   14.82 
  -2  12   3  280.29   14.11 
  -2  12   3  307.78   16.74 
   1 -12  -3  194.78   11.55 
  -1  12   3  189.57   10.13 
  -1  12   3  204.75   12.83 
   0 -12  -3  384.03   18.51 
   0  12   3  334.67   19.36 
   0  12   3  379.32   17.21 
  -1 -12  -3  497.40   22.30 
   1  12   3  429.80   21.30 
   1  12   3  453.45   22.85 
  -2 -12  -3  726.75   33.16 
  -2 -12  -3  707.46   35.93 
   2  12   3  722.65   34.17 
  -3 -12  -3  330.33   16.79 
  -3 -12  -3  323.61   19.72 
   3  12   3  349.82   18.17 
  -4 -12  -3  405.46   20.75 
  -4 -12  -3  467.85   24.09 
   4  12   3  416.40   21.64 
  -5 -12  -3  304.44   19.32 
   5  12   3  363.88   18.49 
  -6 -12  -3   27.00    6.90 
   6  12   3   32.09    6.38 
  -7 -12  -3  246.94   16.44 
   7  12   3  240.50   15.31 
   2 -13  -3  491.76   23.62 
  -2  13   3  461.63   24.30 
   1 -13  -3  426.66   21.88 
  -1  13   3  456.49   23.30 
   0 -13  -3  234.37   13.19 
   0  13   3  224.00   14.44 
  -1 -13  -3  358.72   18.63 
   1  13   3  375.78   19.95 
  -2 -13  -3   84.61    7.42 
   2  13   3   81.43    8.87 
  -3 -13  -3   16.60    4.08 
   3  13   3   11.97    5.31 
  -4 -13  -3   88.60   11.07 
  -4 -13  -3   94.34    7.54 
   4  13   3   98.37    9.49 
  -5 -13  -3   37.90    7.55 
   5  13   3   38.18    6.27 
   6  13   3  247.15   14.76 
   2  13  -4  200.77   12.31 
   2  13  -4  214.40   14.02 
   1  13  -4  355.33   19.63 
   1  13  -4  343.78   17.52 
   0  13  -4  446.05   23.71 
   0  13  -4  440.59   22.06 
   0 -13   4  461.04   21.78 
  -1  13  -4  214.50   13.96 
  -1  13  -4  201.30   12.19 
   1 -13   4  209.15   11.98 
   4  12  -4  444.26   22.44 
   4  12  -4  462.46   23.47 
   3  12  -4  405.02   21.84 
   3  12  -4  414.20   20.55 
   2  12  -4  530.29   27.06 
   2  12  -4  546.24   25.77 
   1  12  -4  268.90   14.49 
   1  12  -4  271.26   15.91 
   0  12  -4  227.16   12.60 
   0  12  -4  219.45   13.91 
   0 -12   4  224.65   12.28 
  -1  12  -4   19.29    4.36 
  -1  12  -4   24.10    5.62 
   1 -12   4   20.69    3.88 
  -2  12  -4  162.70   10.15 
  -2  12  -4  149.53   10.62 
  -2  12  -4  146.59   12.60 
   2 -12   4  166.26    9.10 
   2 -12   4  167.68    9.94 
  -3  12  -4   45.90    6.32 
  -3  12  -4   45.10    8.79 
  -3  12  -4   43.44    6.73 
   3 -12   4   43.71    4.98 
   3 -12   4   51.71    6.29 
  -4  12  -4  259.98   15.92 
  -4  12  -4  270.24   14.29 
  -4  12  -4  261.49   17.07 
   4 -12   4  242.88   14.12 
   4 -12   4  254.68   13.34 
   6  11  -4  674.74   32.93 
   6  11  -4  686.85   34.14 
  -6 -11   4  739.45   36.90 
   5  11  -4  282.38   15.96 
   5  11  -4  276.14   15.33 
  -5 -11   4  290.64   19.54 
   4  11  -4  427.74   22.00 
   4  11  -4  441.10   21.01 
  -4 -11   4  421.05   24.40 
   3  11  -4  232.52   14.23 
   3  11  -4  236.31   13.10 
   2  11  -4  186.12   10.82 
   2  11  -4  211.97   12.71 
   1  11  -4  211.54   12.81 
   1  11  -4  232.76   11.94 
   0  11  -4  222.33   16.54 
   0  11  -4  221.19   11.66 
   0  11  -4  248.27   13.00 
   0  11  -4  249.50   14.21 
   0 -11   4  265.96   12.48 
  -1  11  -4  127.89    9.50 
  -1  11  -4  116.92    7.11 
  -1  11  -4  114.72   10.56 
  -1  11  -4  124.24    8.25 
   1 -11   4  119.63    7.66 
  -2  11  -4  194.02   12.67 
  -2  11  -4  201.77   11.04 
  -2  11  -4  203.88   10.67 
  -2  11  -4  211.01   14.07 
   2 -11   4  203.49   11.23 
  -3  11  -4  264.37   15.13 
  -3  11  -4  279.34   14.45 
  -3  11  -4  271.51   16.74 
   3 -11   4  274.30   13.53 
   3 -11   4  269.37   13.87 
  -4  11  -4  119.91    9.67 
  -4  11  -4  112.74    8.37 
  -4  11  -4  120.38   10.80 
   4 -11   4  108.48    7.38 
   4 -11   4  106.10    8.34 
  -5  11  -4  392.96   21.95 
  -5  11  -4  378.36   19.04 
  -5  11  -4  351.91   20.33 
   5 -11   4  375.10   19.11 
   5 -11   4  384.66   18.43 
   7  10  -4  273.17   17.00 
   7  10  -4  298.17   16.14 
  -7 -10   4  308.30   19.78 
   6  10  -4   98.54    8.26 
   6  10  -4   98.67    9.16 
  -6 -10   4   89.39   11.22 
   5  10  -4  104.26    9.30 
   5  10  -4  111.50    8.52 
  -5 -10   4  133.38   12.09 
   4  10  -4  114.43    7.97 
   4  10  -4   93.35    8.68 
  -4 -10   4  107.17   10.92 
   3  10  -4  174.28   10.43 
   3  10  -4  173.05   11.45 
  -3 -10   4  181.06   13.23 
   2  10  -4  124.69    9.20 
   2  10  -4  114.70    8.21 
  -2 -10   4  122.68    7.04 
  -2 -10   4  127.68   10.81 
   1  10  -4  188.24   11.74 
   1  10  -4  180.48   12.64 
   1  10  -4  198.54    9.39 
   1  10  -4  202.76   10.84 
  -1 -10   4  180.19    9.73 
   0  10  -4  410.24   19.58 
   0  10  -4  393.80   20.68 
   0  10  -4  433.40   22.05 
   0  10  -4  391.96   18.73 
   0 -10   4  421.77   19.25 
  -1  10  -4  670.29   34.02 
  -1  10  -4  727.20   31.27 
  -1  10  -4  702.81   33.14 
  -1  10  -4  722.82   32.11 
   1 -10   4  680.15   31.68 
  -2  10  -4  767.24   36.75 
  -2  10  -4  747.61   33.99 
  -2  10  -4  786.82   34.76 
  -2  10  -4  765.04   35.77 
   2 -10   4  740.86   34.41 
  -3  10  -4  784.38   38.38 
  -3  10  -4  884.36   37.41 
  -3  10  -4  757.71   39.14 
  -3  10  -4  891.41   36.85 
   3 -10   4  795.77   37.07 
  -4  10  -4  448.19   22.11 
  -4  10  -4  479.88   24.50 
  -4  10  -4  435.20   23.19 
   4 -10   4  461.18   22.08 
   4 -10   4  478.13   21.61 
  -5  10  -4  739.77   35.13 
  -5  10  -4  688.34   34.20 
  -5  10  -4  738.26   32.98 
   5 -10   4  700.06   32.43 
   5 -10   4  711.78   32.88 
  -6  10  -4  147.41    9.38 
  -6  10  -4  152.07   11.27 
  -6  10  -4  160.83   12.68 
   6 -10   4  164.76    9.65 
   6 -10   4  158.20   10.18 
   7   9  -4  175.04   10.38 
   7   9  -4  154.17   10.90 
  -7  -9   4  187.00   14.27 
   6   9  -4  231.01   13.22 
   6   9  -4  252.45   14.18 
  -6  -9   4  227.86   16.04 
   5   9  -4   74.98    6.65 
   5   9  -4   59.30    7.09 
  -5  -9   4   51.46    8.60 
   4   9  -4  115.72    8.29 
   4   9  -4  115.81    8.98 
  -4  -9   4  138.03   11.19 
   3   9  -4  132.00    7.45 
   3   9  -4  143.46    8.35 
   3   9  -4  142.76    9.62 
  -3  -9   4  153.12   11.45 
   2   9  -4  634.66   30.17 
   2   9  -4  662.78   28.30 
   2   9  -4  613.53   29.36 
   2   9  -4  629.46   31.24 
  -2  -9   4  646.63   28.53 
  -2  -9   4  636.58   31.36 
   1   9  -4  453.62   21.57 
   1   9  -4  450.93   22.71 
   1   9  -4  390.70   19.82 
   1   9  -4  421.40   20.92 
  -1  -9   4  458.02   20.27 
  -1  -9   4  480.81   23.35 
   0   9  -4  427.74   20.27 
   0   9  -4  390.49   18.33 
   0   9  -4  394.38   21.01 
   0   9  -4  409.97   19.35 
   0  -9   4  401.07   18.79 
  -1   9  -4 1290.68   56.46 
  -1   9  -4 1182.18   55.40 
  -1   9  -4 1230.75   57.24 
  -1   9  -4 1321.58   54.89 
   1  -9   4 1241.92   55.18 
  -2   9  -4  538.86   25.47 
  -2   9  -4  511.15   24.51 
  -2   9  -4  552.07   24.08 
  -2   9  -4  519.88   26.43 
   2  -9   4  532.97   24.44 
  -3   9  -4  931.62   41.76 
  -3   9  -4  968.07   42.29 
  -3   9  -4  876.67   42.96 
  -3   9  -4  995.90   44.22 
   3  -9   4  938.65   42.05 
  -4   9  -4  806.98   38.32 
  -4   9  -4  865.34   36.22 
  -4   9  -4  808.35   36.59 
  -4   9  -4  768.32   37.47 
   4  -9   4  783.09   36.34 
  -5   9  -4  326.56   17.92 
  -5   9  -4  329.06   16.29 
  -5   9  -4  318.63   17.21 
   5  -9   4  326.06   15.79 
   5  -9   4  314.15   16.15 
  -6   9  -4  433.91   19.95 
  -6   9  -4  396.57   21.67 
  -6   9  -4  394.57   20.83 
   6  -9   4  391.62   19.41 
   6  -9   4  405.77   19.53 
  -7   9  -4  297.89   14.52 
  -7   9  -4  280.32   15.96 
  -7   9  -4  272.95   16.29 
   7  -9   4  265.74   14.30 
   7  -9   4  262.22   14.27 
   8   8  -4  118.54    8.74 
   8   8  -4  142.43    9.84 
  -8  -8   4  138.65   12.51 
   7   8  -4  246.02   15.36 
   7   8  -4  262.04   14.78 
  -7  -8   4  305.20   18.32 
   6   8  -4   94.06    7.49 
   6   8  -4   81.94    6.92 
  -6  -8   4   81.69    9.67 
   5   8  -4  956.19   43.12 
   5   8  -4  906.86   43.57 
  -5  -8   4 1000.63   45.76 
   4   8  -4  312.23   16.16 
   4   8  -4  288.00   15.27 
   4   8  -4  316.49   14.32 
  -4  -8   4  324.85   18.11 
   3   8  -4  237.80   13.27 
   3   8  -4  275.76   11.67 
   3   8  -4  240.09   12.80 
  -3  -8   4  252.30   15.08 
  -3  -8   4  227.16   11.55 
   2   8  -4 2648.97  117.46 
   2   8  -4 2599.90  116.51 
   2   8  -4 2753.61  116.06 
   2   8  -4 2716.07  115.10 
  -2  -8   4 2637.49  117.92 
  -2  -8   4 2630.55  115.17 
   1   8  -4  752.52   34.35 
   1   8  -4  851.81   36.99 
   1   8  -4  782.31   35.20 
   1   8  -4  765.90   35.83 
  -1  -8   4  762.10   34.50 
  -1  -8   4  774.46   36.99 
   0   8  -4 1534.62   71.42 
   0   8  -4 1699.87   72.27 
   0   8  -4 1632.97   73.65 
   0   8  -4 1745.88   72.97 
   0  -8   4 1704.35   71.72 
   0  -8   4 1563.41   73.73 
  -1   8  -4  676.41   29.68 
  -1   8  -4  691.32   30.26 
  -1   8  -4  632.96   31.66 
  -1   8  -4  680.28   31.01 
   1  -8   4  663.12   31.85 
   1  -8   4  659.97   29.86 
  -2   8  -4  509.27   24.58 
  -2   8  -4  471.14   22.99 
  -2   8  -4  525.16   22.53 
  -2   8  -4  499.11   23.80 
   2  -8   4  477.13   22.71 
  -3   8  -4  342.75   17.56 
  -3   8  -4  352.87   18.38 
  -3   8  -4  348.72   16.24 
  -3   8  -4  361.90   16.77 
   3  -8   4  343.21   16.49 
  -4   8  -4   98.31    6.48 
  -4   8  -4  114.79    6.65 
  -4   8  -4  102.70    7.74 
  -4   8  -4  108.12    8.47 
   4  -8   4  104.55    6.41 
  -5   8  -4  185.30    9.72 
  -5   8  -4  170.77    9.65 
  -5   8  -4  159.07   10.59 
  -5   8  -4  192.85   11.99 
   5  -8   4  182.15   10.04 
  -6   8  -4  297.79   16.91 
  -6   8  -4  285.90   15.61 
  -6   8  -4  343.42   16.82 
   6  -8   4  308.28   15.70 
   6  -8   4  332.05   15.27 
  -7   8  -4  170.13   11.10 
  -7   8  -4  175.33   11.99 
  -7   8  -4  164.03    9.71 
   7  -8   4  174.72   10.34 
   7  -8   4  168.97    9.95 
  -8   8  -4  472.13   24.70 
  -8   8  -4  463.97   23.30 
  -8   8  -4  491.73   24.90 
   8  -8   4  526.77   23.75 
   8  -8   4  487.39   23.36 
   8   7  -4   79.48    8.74 
   8   7  -4  101.02    8.26 
  -8  -7   4   89.26   10.26 
   7   7  -4  325.92   17.29 
   7   7  -4  317.43   16.57 
  -7  -7   4  316.17   18.81 
   6   7  -4  394.98   20.61 
   6   7  -4  391.40   20.80 
  -6  -7   4  490.06   23.41 
   5   7  -4  902.60   42.14 
   5   7  -4  943.48   40.67 
   5   7  -4  907.88   41.62 
  -5  -7   4  946.57   43.87 
   4   7  -4 1853.24   85.75 
   4   7  -4 2060.66   84.97 
   4   7  -4 1884.48   86.17 
  -4  -7   4 2036.21   87.96 
   3   7  -4 2165.94   98.43 
   3   7  -4 2192.61   98.11 
   3   7  -4 2467.32   99.69 
  -3  -7   4 2174.27   97.08 
   2   7  -4 1492.78   68.03 
   2   7  -4 1586.67   66.87 
   2   7  -4 1536.14   65.99 
   2   7  -4 1477.71   67.09 
  -2  -7   4 1460.33   68.40 
  -2  -7   4 1566.47   65.96 
   1   7  -4  356.84   17.11 
   1   7  -4  371.58   17.58 
   1   7  -4  371.30   18.56 
   1   7  -4  338.63   16.40 
  -1  -7   4  356.17   16.43 
  -1  -7   4  385.08   18.99 
   0   7  -4  831.71   37.80 
   0   7  -4  793.72   37.24 
   0   7  -4  863.46   36.69 
   0   7  -4  845.02   38.60 
   0  -7   4  832.72   36.77 
   0  -7   4  839.06   38.73 
  -1   7  -4  656.86   28.88 
  -1   7  -4  647.67   29.44 
  -1   7  -4  589.50   28.26 
  -1   7  -4  689.04   30.31 
   1  -7   4  633.80   28.47 
   1  -7   4  618.84   30.19 
  -2   7  -4  492.24   22.24 
  -2   7  -4  486.67   22.88 
  -2   7  -4  536.06   21.95 
  -2   7  -4  459.97   23.47 
   2  -7   4  449.26   23.43 
   2  -7   4  485.08   22.03 
  -3   7  -4  214.26   10.96 
  -3   7  -4  227.89   11.26 
  -3   7  -4  234.39   12.03 
  -3   7  -4  227.50   12.67 
   3  -7   4  223.71   11.23 
  -4   7  -4  309.47   15.21 
  -4   7  -4  295.57   15.75 
  -4   7  -4  299.52   14.08 
  -4   7  -4  298.90   14.58 
   4  -7   4  288.16   14.39 
  -5   7  -4  474.85   22.55 
  -5   7  -4  411.36   21.56 
  -5   7  -4  490.61   23.14 
  -5   7  -4  486.85   21.65 
   5  -7   4  475.04   21.82 
  -6   7  -4  236.93   12.18 
  -6   7  -4  244.17   13.52 
  -6   7  -4  243.46   13.22 
   6  -7   4  238.80   12.26 
   6  -7   4  234.58   12.44 
  -7   7  -4  392.32   19.44 
  -7   7  -4  396.40   20.24 
  -7   7  -4  416.63   20.67 
   7  -7   4  394.91   19.20 
   7  -7   4  398.95   19.39 
  -8   7  -4  353.02   17.60 
  -8   7  -4  331.06   18.38 
  -8   7  -4  360.24   18.71 
   8  -7   4  346.48   17.49 
   8  -7   4  346.97   17.30 
  -9   7  -4  425.81   21.52 
  -9   7  -4  382.00   21.13 
  -9   7  -4  396.78   20.22 
   9  -7   4  403.94   20.16 
   9  -7   4  434.24   20.14 
   9   6  -4  111.49   10.17 
   9   6  -4  115.12    9.38 
  -9  -6   4  128.71   12.45 
   8   6  -4  688.83   31.95 
   8   6  -4  666.19   32.31 
  -8  -6   4  688.63   34.30 
   7   6  -4  412.98   20.57 
   7   6  -4  418.46   21.15 
  -7  -6   4  427.12   22.86 
   6   6  -4  783.38   34.52 
   6   6  -4  752.01   35.72 
   6   6  -4  748.04   35.29 
  -6  -6   4  826.43   37.94 
   5   6  -4  524.21   25.29 
   5   6  -4  560.37   25.08 
   5   6  -4  541.66   24.24 
  -5  -6   4  535.99   27.03 
   4   6  -4  490.44   23.21 
   4   6  -4  529.28   24.01 
   4   6  -4  497.24   24.17 
  -4  -6   4  566.88   26.06 
   3   6  -4 1159.34   51.96 
   3   6  -4 1096.20   50.60 
   3   6  -4 1206.22   50.01 
   3   6  -4 1101.28   50.81 
  -3  -6   4 1116.93   49.58 
  -3  -6   4 1193.86   52.42 
   2   6  -4  897.54   41.11 
   2   6  -4  921.50   40.92 
   2   6  -4 1003.33   40.33 
   2   6  -4  860.77   41.97 
  -2  -6   4  913.86   40.08 
  -2  -6   4  925.38   42.50 
   1   6  -4 1211.95   48.39 
   1   6  -4 1056.72   49.13 
   1   6  -4 1102.73   48.95 
  -1  -6   4 1061.16   48.21 
   0   6  -4  521.40   22.71 
   0   6  -4  530.04   22.45 
   0   6  -4  437.40   21.62 
   0  -6   4  494.87   21.71 
   0  -6   4  461.20   23.37 
  -1   6  -4  256.12   13.70 
  -1   6  -4  265.85   12.50 
  -1   6  -4  249.95   12.87 
  -1   6  -4  277.06   13.89 
  -1   6  -4  273.17   12.10 
   1  -6   4  249.38   13.56 
   1  -6   4  244.47   12.08 
  -2   6  -4  695.63   29.17 
  -2   6  -4  635.26   30.14 
  -2   6  -4  657.15   30.25 
  -2   6  -4  642.56   28.70 
  -2   6  -4  626.19   29.45 
   2  -6   4  633.48   30.05 
   2  -6   4  649.84   28.87 
  -3   6  -4  278.65   14.68 
  -3   6  -4  293.96   14.04 
  -3   6  -4  275.09   13.30 
  -3   6  -4  287.99   13.69 
  -3   6  -4  273.34   14.70 
   3  -6   4  281.76   14.42 
   3  -6   4  294.93   13.50 
  -4   6  -4  171.73   10.27 
  -4   6  -4  194.58    9.22 
  -4   6  -4  183.57    9.79 
  -4   6  -4  163.07    9.33 
   4  -6   4  182.43    9.28 
  -5   6  -4 2490.11  107.55 
  -5   6  -4 2386.51  107.88 
  -5   6  -4 2587.89  106.89 
  -5   6  -4 2364.34  106.98 
   5  -6   4 2477.17  106.97 
  -6   6  -4  484.44   23.03 
  -6   6  -4  475.04   21.73 
  -6   6  -4  483.91   22.67 
  -6   6  -4  453.05   22.00 
   6  -6   4  464.30   21.99 
  -7   6  -4  492.48   22.90 
  -7   6  -4  513.62   23.85 
  -7   6  -4  478.12   23.75 
   7  -6   4  474.53   22.64 
   7  -6   4  499.74   22.85 
  -8   6  -4  716.30   33.32 
  -8   6  -4  679.14   32.49 
  -8   6  -4  682.03   33.32 
   8  -6   4  735.26   32.40 
   8  -6   4  729.28   32.41 
  -9   6  -4  108.86    8.83 
  -9   6  -4  104.68    8.78 
  -9   6  -4  101.54    7.10 
   9  -6   4   97.88    7.77 
   9  -6   4  102.84    7.76 
   9   5  -4  521.70   25.49 
   9   5  -4  526.04   25.90 
  -9  -5   4  522.94   27.81 
   8   5  -4  211.91   12.66 
   8   5  -4  224.24   12.20 
  -8  -5   4  234.70   15.49 
   7   5  -4  634.06   29.70 
   7   5  -4  617.83   28.25 
   7   5  -4  602.48   29.08 
  -7  -5   4  648.66   31.34 
   6   5  -4  811.37   37.55 
   6   5  -4  810.51   38.06 
   6   5  -4  867.65   36.98 
  -6  -5   4  837.97   39.64 
   5   5  -4  546.44   25.85 
   5   5  -4  559.23   25.46 
   5   5  -4  536.33   24.82 
  -5  -5   4  573.09   27.47 
   4   5  -4  648.58   28.20 
   4   5  -4  641.79   27.58 
   4   5  -4  576.95   29.03 
   4   5  -4  625.81   28.33 
  -4  -5   4  610.94   29.82 
   3   5  -4   98.83    5.87 
   3   5  -4   96.40    5.43 
   3   5  -4  102.59    7.13 
   3   5  -4  103.91    5.89 
  -3  -5   4   79.19    7.37 
  -3  -5   4   93.59    4.55 
  -3  -5   4   99.14    4.56 
  -3  -5   4  114.31    8.30 
   2   5  -4  107.62    6.73 
   2   5  -4  128.41    7.92 
   2   5  -4  123.24    6.10 
  -2  -5   4  120.36    5.71 
  -2  -5   4  129.74    8.24 
  -2  -5   4  111.89    5.64 
   1   5  -4  562.87   28.05 
   1   5  -4  589.15   27.19 
   1   5  -4  596.01   27.25 
   1   5  -4  638.11   26.71 
  -1  -5   4  668.59   28.50 
  -1  -5   4  573.34   26.47 
   0   5  -4   68.31    5.55 
   0   5  -4   59.21    4.45 
   0   5  -4   70.45    3.96 
   0   5  -4   74.53    4.78 
   0   5  -4   77.21    6.38 
   0  -5   4   63.87    5.55 
  -1   5  -4  751.01   33.51 
  -1   5  -4  737.41   34.37 
  -1   5  -4  803.92   34.62 
  -1   5  -4  773.04   33.16 
   1  -5   4  712.91   34.31 
   1  -5   4  747.90   33.11 
  -2   5  -4 1527.97   62.91 
  -2   5  -4 1523.07   64.14 
  -2   5  -4 1397.80   63.94 
  -2   5  -4 1395.42   63.10 
   2  -5   4 1389.71   62.86 
   2  -5   4 1440.69   63.94 
  -3   5  -4 1776.22   75.70 
  -3   5  -4 1901.27   74.63 
  -3   5  -4 1525.32   75.37 
   3  -5   4 1598.26   75.23 
   3  -5   4 1787.21   74.65 
  -4   5  -4 1461.19   65.64 
  -4   5  -4 1498.80   65.62 
  -4   5  -4 1446.80   65.12 
  -4   5  -4 1596.37   64.79 
  -4   5  -4 1497.86   64.87 
   4  -5   4 1440.55   64.77 
   4  -5   4 1449.95   65.41 
  -5   5  -4  876.33   40.77 
  -5   5  -4  894.17   41.60 
  -5   5  -4  918.03   40.91 
  -5   5  -4  979.28   41.82 
  -5   5  -4  957.11   41.39 
   5  -5   4  916.47   40.87 
  -6   5  -4  275.03   13.64 
  -6   5  -4  276.31   14.21 
  -6   5  -4  288.45   13.66 
  -6   5  -4  284.90   14.47 
   6  -5   4  284.76   13.81 
  -7   5  -4  754.33   34.50 
  -7   5  -4  746.30   34.56 
  -7   5  -4  728.40   33.83 
   7  -5   4  774.19   33.94 
   7  -5   4  754.21   33.72 
  -8   5  -4  313.97   15.95 
  -8   5  -4  304.67   15.60 
  -8   5  -4  286.85   15.12 
   8  -5   4  307.59   15.15 
   8  -5   4  303.90   15.08 
  -9   5  -4  205.71   12.19 
  -9   5  -4  200.49   11.85 
  -9   5  -4  204.05   11.42 
   9  -5   4  203.31   11.29 
   9  -5   4  202.47   11.28 
 -10   5  -4  137.42    9.73 
 -10   5  -4  147.77    8.76 
 -10   5  -4  141.17   10.18 
  10  -5   4  137.59    9.17 
  10  -5   4  131.04    8.37 
   9   4  -4  389.70   20.84 
   9   4  -4  415.10   20.20 
  -9  -4   4  391.21   22.61 
   8   4  -4  635.20   30.21 
   8   4  -4  664.18   31.77 
   8   4  -4  654.87   31.13 
  -8  -4   4  725.85   33.76 
   7   4  -4  404.46   19.51 
   7   4  -4  406.18   20.27 
   7   4  -4  408.19   18.93 
  -7  -4   4  410.24   21.70 
   6   4  -4   87.02    6.18 
   6   4  -4   87.22    5.86 
   6   4  -4   85.84    5.63 
  -6  -4   4   85.09    8.67 
   5   4  -4  194.61    9.45 
   5   4  -4  194.99    9.92 
   5   4  -4  202.31   10.47 
  -5  -4   4  170.88   11.61 
   4   4  -4  284.61   13.15 
   4   4  -4  250.87   14.50 
   4   4  -4  287.97   13.89 
   4   4  -4  291.44   13.79 
  -4  -4   4  294.16   14.99 
  -4  -4   4  286.61   15.30 
   3   4  -4  254.05   12.62 
   3   4  -4  265.01   13.82 
   3   4  -4  291.46   12.32 
   3   4  -4  257.32   12.76 
  -3  -4   4  257.51   11.53 
  -3  -4   4  283.28   14.02 
  -3  -4   4  257.76   14.13 
  -3  -4   4  248.74   11.48 
   2   4  -4  552.28   23.73 
   2   4  -4  515.67   22.60 
   2   4  -4  470.99   22.54 
   2   4  -4  500.14   22.15 
  -2  -4   4  503.90   23.68 
  -2  -4   4  475.34   23.72 
  -2  -4   4  475.36   21.73 
  -2  -4   4  489.12   21.70 
   1   4  -4  421.48   19.57 
   1   4  -4  463.89   19.21 
   1   4  -4  440.33   20.51 
  -1  -4   4  410.64   18.86 
  -1  -4   4  437.12   20.63 
  -1  -4   4  405.34   18.90 
   0   4  -4 1387.88   60.45 
   0   4  -4 1428.31   59.70 
   0   4  -4 1327.30   59.60 
   0   4  -4 1422.25   59.28 
   0  -4   4 1259.63   60.35 
  -1   4  -4  651.59   28.61 
  -1   4  -4  680.86   29.43 
  -1   4  -4  677.34   28.26 
  -1   4  -4  659.47   28.58 
  -1   4  -4  596.46   29.23 
   1  -4   4  626.10   29.26 
   1  -4   4  601.59   28.16 
  -2   4  -4 1331.41   56.30 
  -2   4  -4 1265.27   56.05 
  -2   4  -4 1355.38   57.07 
  -2   4  -4 1286.07   56.31 
  -2   4  -4 1270.37   56.95 
   2  -4   4 1230.69   56.81 
   2  -4   4 1284.88   56.07 
  -3   4  -4  559.37   27.26 
  -3   4  -4  584.35   26.50 
  -3   4  -4  610.58   26.80 
  -3   4  -4  643.42   26.75 
  -3   4  -4  603.15   27.39 
   3  -4   4  580.97   27.05 
   3  -4   4  613.63   26.62 
  -4   4  -4 1281.35   53.79 
  -4   4  -4 1220.57   53.85 
  -4   4  -4 1348.81   54.58 
  -4   4  -4 1126.31   54.29 
   4  -4   4 1176.78   53.76 
  -5   4  -4  503.24   23.72 
  -5   4  -4  523.33   23.36 
  -5   4  -4  534.78   24.02 
  -5   4  -4  496.12   23.39 
  -5   4  -4  549.86   24.01 
   5  -4   4  502.52   23.38 
  -6   4  -4  514.88   25.20 
  -6   4  -4  527.86   25.21 
  -6   4  -4  533.38   24.90 
  -6   4  -4  611.77   25.43 
  -6   4  -4  560.93   24.86 
   6  -4   4  534.27   24.78 
  -7   4  -4  100.73    6.85 
  -7   4  -4  105.14    6.68 
  -7   4  -4  108.06    7.09 
   7  -4   4  108.05    6.17 
   7  -4   4  104.00    6.61 
  -8   4  -4  110.48    7.39 
  -8   4  -4  119.59    7.33 
  -8   4  -4  124.80    7.92 
   8  -4   4  117.20    7.22 
   8  -4   4   96.83    7.06 
  -9   4  -4  257.06   13.49 
  -9   4  -4  260.88   13.39 
  -9   4  -4  257.64   14.06 
   9  -4   4  240.09   13.11 
   9  -4   4  262.89   13.21 
 -10   4  -4   27.31    4.62 
 -10   4  -4   35.30    5.40 
 -10   4  -4   44.01    6.49 
  10  -4   4   34.46    4.69 
  10  -4   4   34.62    5.21 
   9   3  -4   31.25    5.19 
   9   3  -4   39.97    4.82 
   9   3  -4   31.92    5.84 
  -9  -3   4   40.84    7.80 
   8   3  -4  339.90   17.07 
   8   3  -4  326.52   17.69 
   8   3  -4  338.06   16.26 
  -8  -3   4  348.54   19.10 
   7   3  -4  251.01   13.63 
   7   3  -4  245.85   13.09 
   7   3  -4  245.32   12.48 
  -7  -3   4  261.92   15.04 
   6   3  -4  400.00   18.78 
   6   3  -4  402.19   19.35 
   6   3  -4  402.35   19.75 
  -6  -3   4  428.59   21.23 
   5   3  -4  138.63    7.89 
   5   3  -4  136.62    7.24 
   5   3  -4  136.60    7.74 
   5   3  -4  147.48    9.26 
  -5  -3   4  127.36    9.28 
   4   3  -4  718.59   33.10 
   4   3  -4  771.59   32.67 
   4   3  -4  746.92   32.95 
  -4  -3   4  727.39   34.14 
  -4  -3   4  725.66   34.40 
   3   3  -4  597.00   27.90 
   3   3  -4  606.70   28.21 
   3   3  -4  677.58   29.26 
   3   3  -4  554.84   28.11 
  -3  -3   4  624.84   27.19 
  -3  -3   4  689.15   29.74 
  -3  -3   4  653.27   29.34 
  -3  -3   4  634.68   27.23 
   2   3  -4 1713.60   73.74 
   2   3  -4 1603.54   73.92 
   2   3  -4 1640.36   73.90 
   2   3  -4 1733.04   74.91 
  -2  -3   4 1623.17   73.30 
  -2  -3   4 1804.53   75.26 
  -2  -3   4 1787.12   75.04 
   1   3  -4 1069.10   46.79 
   1   3  -4 1025.75   46.99 
   1   3  -4 1169.23   46.53 
   1   3  -4 1118.28   47.95 
  -1  -3   4 1059.29   47.93 
  -1  -3   4  975.80   46.48 
  -1  -3   4 1099.28   48.09 
   0   3  -4 1682.29   70.71 
   0   3  -4 1519.24   70.40 
   0   3  -4 1651.62   71.60 
   0   3  -4 1635.50   70.58 
   0   3  -4 1551.01   70.79 
   0  -3   4 1624.79   70.50 
   0  -3   4 1743.67   71.70 
  -1   3  -4 3476.63  142.36 
  -1   3  -4 3310.85  142.38 
  -1   3  -4 3130.50  143.18 
  -1   3  -4 3408.57  143.30 
  -1   3  -4 3093.97  142.45 
  -1   3  -4 3227.40  142.59 
   1  -3   4 3340.14  142.31 
   1  -3   4 3438.60  143.28 
  -2   3  -4  930.87   39.03 
  -2   3  -4  919.33   39.78 
  -2   3  -4  842.35   39.13 
  -2   3  -4  857.70   39.02 
  -2   3  -4  920.28   39.79 
   2  -3   4  872.48   38.98 
   2  -3   4  937.85   39.65 
   2  -3   4  860.86   39.00 
  -3   3  -4  853.10   36.38 
  -3   3  -4  879.33   37.00 
  -3   3  -4  845.89   36.43 
  -3   3  -4  768.31   36.86 
  -3   3  -4  807.90   36.44 
   3  -3   4  834.64   36.64 
   3  -3   4  818.90   36.41 
  -4   3  -4  786.67   36.09 
  -4   3  -4  810.17   36.19 
  -4   3  -4  852.74   36.55 
  -4   3  -4  794.14   36.46 
  -4   3  -4  863.63   36.13 
   4  -3   4  815.78   36.13 
  -5   3  -4   31.02    3.16 
  -5   3  -4   27.67    2.99 
  -5   3  -4   27.37    3.22 
  -5   3  -4   31.67    3.10 
  -5   3  -4   20.95    2.53 
   5  -3   4   26.71    2.60 
  -6   3  -4  680.51   31.89 
  -6   3  -4  714.33   32.07 
  -6   3  -4  726.58   32.12 
  -6   3  -4  740.51   32.02 
  -6   3  -4  703.08   32.29 
   6  -3   4  737.54   32.01 
  -7   3  -4   56.66    4.54 
  -7   3  -4   54.16    4.89 
  -7   3  -4   54.55    4.44 
  -7   3  -4   56.82    4.61 
  -7   3  -4   50.94    4.56 
   7  -3   4   53.31    4.01 
  -8   3  -4  141.34    8.05 
  -8   3  -4  135.15    8.15 
  -8   3  -4  139.38    8.00 
  -8   3  -4  147.92    8.75 
   8  -3   4  149.37    8.16 
   8  -3   4  146.53    8.18 
  -9   3  -4  273.31   14.08 
  -9   3  -4  266.85   13.47 
  -9   3  -4  245.64   13.57 
   9  -3   4  277.05   13.57 
   9  -3   4  279.71   13.55 
 -10   3  -4  205.49   11.27 
 -10   3  -4  207.46   11.25 
 -10   3  -4  221.96   12.63 
  10  -3   4  206.60   11.49 
  10  -3   4  218.48   11.44 
   9   2  -4   47.19    6.46 
   9   2  -4   47.14    7.17 
   9   2  -4   50.97    5.29 
  -9  -2   4   47.94    8.76 
   8   2  -4   31.36    5.14 
   8   2  -4   32.62    4.34 
   8   2  -4   32.69    4.34 
  -8  -2   4   43.27    7.01 
   7   2  -4   97.91    7.05 
   7   2  -4  112.59    6.73 
   7   2  -4  109.49    6.55 
   6   2  -4  235.76   11.67 
   6   2  -4  249.01   12.68 
   6   2  -4  234.11   12.13 
   5   2  -4  770.16   34.25 
   5   2  -4  777.69   34.57 
   5   2  -4  759.16   35.33 
   5   2  -4  749.90   34.82 
  -5  -2   4  810.06   36.21 
   4   2  -4 1585.75   71.88 
   4   2  -4 1690.79   70.92 
   4   2  -4 1690.85   72.14 
   4   2  -4 1664.03   72.82 
   4   2  -4 1658.24   71.68 
  -4  -2   4 1617.76   73.16 
  -4  -2   4 1634.93   70.94 
   3   2  -4 1214.59   59.71 
   3   2  -4 1372.48   58.19 
   3   2  -4 1334.19   58.96 
   3   2  -4 1425.94   58.82 
   3   2  -4 1340.13   58.99 
  -3  -2   4 1309.85   60.17 
  -3  -2   4 1430.70   60.21 
  -3  -2   4 1374.00   58.22 
   2   2  -4 1019.88   44.19 
   2   2  -4  997.19   44.12 
   2   2  -4 1024.52   44.29 
   2   2  -4 1071.77   43.69 
  -2  -2   4  924.41   45.23 
  -2  -2   4 1027.12   43.72 
  -2  -2   4 1000.14   45.17 
   1   2  -4 3211.65  134.51 
   1   2  -4 2769.76  134.36 
   1   2  -4 3126.32  134.55 
   1   2  -4 3266.88  134.71 
   1   2  -4 3188.94  134.26 
  -1  -2   4 3115.22  135.61 
  -1  -2   4 3293.49  134.30 
  -1  -2   4 2985.73  135.44 
   0   2  -4 2443.56  103.65 
   0   2  -4 2330.40  103.89 
   0   2  -4 2349.08  103.65 
   0   2  -4 2325.19  103.77 
   0   2  -4 2274.98  104.59 
   0   2  -4 2447.57  104.67 
   0  -2   4 2436.34  103.55 
   0  -2   4 2367.55  103.62 
   0  -2   4 2659.97  104.83 
  -1   2  -4 1119.21   47.37 
  -1   2  -4 1064.98   46.74 
  -1   2  -4 1037.22   46.46 
  -1   2  -4 1070.94   47.39 
  -1   2  -4 1073.15   46.61 
  -1   2  -4 1060.82   46.56 
   1  -2   4 1076.39   46.34 
  -2   2  -4  182.33    9.05 
  -2   2  -4  179.35    8.47 
  -2   2  -4  180.59    8.44 
  -2   2  -4  178.21    9.08 
  -2   2  -4  171.96    8.23 
  -2   2  -4  181.07    8.41 
   2  -2   4  187.68    8.91 
   2  -2   4  181.29    8.23 
  -3   2  -4 1632.34   70.50 
  -3   2  -4 1748.63   70.45 
  -3   2  -4 1446.64   70.80 
  -3   2  -4 1687.73   70.59 
  -3   2  -4 1605.11   70.48 
   3  -2   4 1649.39   70.39 
   3  -2   4 1621.56   70.50 
  -4   2  -4   48.25    3.07 
  -4   2  -4   45.07    2.96 
  -4   2  -4   49.45    3.45 
  -4   2  -4   47.21    3.35 
  -4   2  -4   43.25    2.88 
   4  -2   4   39.35    3.29 
  -5   2  -4  451.08   20.99 
  -5   2  -4  475.41   21.10 
  -5   2  -4  471.12   21.13 
  -5   2  -4  473.66   21.09 
   5  -2   4  474.51   21.16 
  -6   2  -4  268.87   13.24 
  -6   2  -4  304.99   13.37 
  -6   2  -4  281.48   13.10 
  -6   2  -4  279.05   13.54 
   6  -2   4  277.32   13.30 
  -7   2  -4  692.69   30.19 
  -7   2  -4  706.45   30.13 
  -7   2  -4  690.39   29.96 
  -7   2  -4  649.09   29.88 
  -7   2  -4  621.95   30.46 
   7  -2   4  683.71   30.16 
  -8   2  -4  567.88   25.75 
  -8   2  -4  557.73   25.38 
  -8   2  -4  544.05   25.34 
  -8   2  -4  577.40   26.33 
   8  -2   4  564.16   25.57 
   8  -2   4  585.20   25.71 
  -9   2  -4  702.04   31.88 
  -9   2  -4  764.94   33.18 
  -9   2  -4  694.16   31.85 
  -9   2  -4  697.25   32.31 
   9  -2   4  713.01   32.20 
   9  -2   4  718.76   32.22 
 -10   2  -4  390.68   18.59 
 -10   2  -4  414.00   20.14 
 -10   2  -4  384.85   18.90 
  10  -2   4  402.74   19.02 
  10  -2   4  393.78   18.90 
 -11   2  -4  326.96   17.41 
 -11   2  -4  320.92   15.65 
  11  -2   4  314.21   16.40 
  11  -2   4  312.64   16.01 
  11  -2   4  315.83   15.84 
   9   1  -4  558.03   26.28 
   9   1  -4  547.02   25.67 
   8   1  -4  449.95   21.76 
   8   1  -4  427.88   21.93 
  -8  -1   4  503.79   23.25 
  -8  -1   4  493.42   24.51 
   7   1  -4  296.29   15.11 
   7   1  -4  298.31   14.73 
  -7  -1   4  307.18   15.55 
  -7  -1   4  324.15   17.54 
   6   1  -4 1136.28   51.24 
   6   1  -4 1100.38   50.94 
   6   1  -4 1193.79   50.24 
  -6  -1   4 1201.96   53.18 
  -6  -1   4 1166.81   51.73 
   5   1  -4  628.28   27.12 
   5   1  -4  587.34   27.19 
  -5  -1   4  606.42   27.62 
  -5  -1   4  601.99   28.91 
  -5  -1   4  604.36   26.38 
   4   1  -4  542.75   21.82 
   4   1  -4  490.89   23.47 
   4   1  -4  504.43   22.38 
   4   1  -4  489.41   22.51 
  -4  -1   4  440.47   23.77 
  -4  -1   4  496.44   21.79 
  -4  -1   4  509.64   23.97 
  -4  -1   4  509.28   22.84 
   3   1  -4 2046.43   92.38 
   3   1  -4 2169.46   91.91 
   3   1  -4 2173.35   92.36 
  -3  -1   4 2108.54   93.72 
  -3  -1   4 2261.34   92.63 
  -3  -1   4 2134.61   91.91 
  -3  -1   4 2037.65   93.60 
   2   1  -4  348.36   16.89 
   2   1  -4  360.21   16.88 
   2   1  -4  355.42   17.91 
   2   1  -4  353.97   16.48 
  -2  -1   4  425.96   18.38 
  -2  -1   4  400.38   18.17 
  -2  -1   4  376.63   16.52 
  -2  -1   4  381.76   16.93 
   1   1  -4 2213.23   93.24 
   1   1  -4 2067.96   93.20 
   1   1  -4 2350.16   93.47 
   1   1  -4 1981.03   94.24 
   1   1  -4 2032.37   94.27 
   1   1  -4 2344.69   93.47 
  -1  -1   4 2284.79   93.17 
  -1  -1   4 2012.59   94.25 
   0   1  -4  340.90   15.86 
   0   1  -4  369.28   17.13 
   0   1  -4  358.01   16.24 
   0   1  -4  364.16   15.91 
   0   1  -4  357.87   16.07 
   0   1  -4  365.72   16.26 
   0  -1   4  397.16   17.21 
   0  -1   4  331.50   16.04 
   0  -1   4  380.59   17.11 
   0  -1   4  365.42   16.18 
  -1   1  -4 1285.12   54.89 
  -1   1  -4 1200.61   54.12 
  -1   1  -4 1260.74   54.15 
   1  -1   4 1231.08   54.68 
   1  -1   4 1269.44   54.07 
   1  -1   4 1240.23   53.73 
  -2   1  -4   90.97    3.99 
  -2   1  -4   81.43    4.36 
  -2   1  -4   84.12    5.06 
  -2   1  -4   86.46    4.86 
  -2   1  -4   91.17    4.44 
  -2   1  -4   81.47    4.44 
   2  -1   4   87.34    4.66 
   2  -1   4   87.23    4.00 
   2  -1   4   80.02    4.29 
  -3   1  -4 1462.86   60.48 
  -3   1  -4 1437.87   60.28 
  -3   1  -4 1282.70   60.50 
  -3   1  -4 1449.75   60.41 
  -3   1  -4 1332.14   60.61 
  -3   1  -4 1404.84   60.79 
   3  -1   4 1340.87   60.16 
   3  -1   4 1445.56   60.28 
  -4   1  -4 1841.58   89.29 
  -4   1  -4 2012.79   89.18 
  -4   1  -4 2153.94   89.29 
  -4   1  -4 2152.66   89.25 
   4  -1   4 2157.01   89.29 
  -5   1  -4  458.37   20.10 
  -5   1  -4  446.36   20.38 
  -5   1  -4  461.89   20.02 
  -5   1  -4  461.56   20.24 
  -5   1  -4  469.71   20.25 
  -5   1  -4  413.83   20.30 
  -6   1  -4  851.49   38.32 
  -6   1  -4  943.33   38.05 
  -6   1  -4  802.06   37.92 
  -6   1  -4  832.45   38.33 
  -6   1  -4  905.35   38.68 
   6  -1   4  896.72   38.45 
  -7   1  -4  967.34   42.10 
  -7   1  -4  893.46   41.12 
  -7   1  -4  965.04   41.66 
  -7   1  -4  938.76   41.11 
  -7   1  -4  938.06   41.61 
   7  -1   4  971.66   41.67 
  -8   1  -4  797.59   35.73 
  -8   1  -4  833.19   36.96 
  -8   1  -4  823.04   35.79 
  -8   1  -4  806.29   36.37 
   8  -1   4  813.71   36.30 
   8  -1   4  827.78   36.25 
  -9   1  -4  342.97   16.02 
  -9   1  -4  342.80   16.82 
  -9   1  -4  353.31   16.11 
  -9   1  -4  386.54   17.74 
   9  -1   4  338.07   16.51 
   9  -1   4  356.11   16.71 
 -10   1  -4  568.66   24.72 
 -10   1  -4  483.01   23.12 
 -10   1  -4  515.22   22.87 
  10  -1   4  484.53   23.26 
  10  -1   4  484.49   23.62 
  10  -1   4  499.21   23.38 
 -11   1  -4  775.90   33.39 
 -11   1  -4  757.48   34.90 
  11  -1   4  738.90   33.80 
  11  -1   4  727.72   34.10 
  11  -1   4  706.75   33.66 
   9   0  -4  365.11   18.78 
   9   0  -4  391.75   19.07 
  -9   0   4  382.03   20.40 
  -9   0   4  418.87   22.17 
   8   0  -4  674.13   30.67 
   8   0  -4  673.70   30.85 
  -8   0   4  691.71   33.25 
  -8   0   4  655.94   31.81 
   7   0  -4  660.51   30.38 
   7   0  -4  661.79   30.12 
  -7   0   4  679.84   32.43 
   6   0  -4 1416.62   56.96 
   6   0  -4 1298.18   57.67 
   6   0  -4 1361.41   57.59 
  -6   0   4 1283.54   58.28 
  -6   0   4 1197.20   59.16 
   5   0  -4  661.11   27.92 
   5   0  -4  640.89   29.58 
   5   0  -4  656.60   28.48 
   5   0  -4  625.67   28.49 
  -5   0   4  643.42   29.08 
  -5   0   4  617.16   30.12 
  -5   0   4  612.90   30.05 
   4   0  -4 1181.65   52.16 
   4   0  -4 1146.07   50.51 
   4   0  -4 1183.48   50.99 
   4   0  -4 1183.20   50.96 
  -4   0   4 1127.26   51.33 
  -4   0   4 1154.09   50.57 
  -4   0   4 1256.84   52.68 
  -4   0   4 1095.49   52.29 
   3   0  -4  231.42   12.71 
   3   0  -4  235.74   11.64 
   3   0  -4  257.98   11.27 
   3   0  -4  240.63   11.65 
  -3   0   4  238.68   12.96 
  -3   0   4  254.74   11.30 
  -3   0   4  267.21   13.13 
  -3   0   4  273.62   11.91 
   2   0  -4  826.56   36.80 
   2   0  -4  790.30   36.72 
   2   0  -4  874.93   38.01 
   2   0  -4  844.79   36.56 
  -2   0   4  825.58   36.57 
  -2   0   4  926.33   36.95 
  -2   0   4  860.27   37.96 
  -2   0   4  777.83   37.88 
   1   0  -4  853.91   36.75 
   1   0  -4  735.76   37.46 
   1   0  -4  907.97   36.62 
   1   0  -4  924.27   37.91 
   1   0  -4  834.25   36.63 
   1   0  -4  821.03   36.53 
  -1   0   4  836.00   36.55 
  -1   0   4  779.77   37.58 
  -1   0   4  838.87   37.73 
  -1   0   4  866.53   36.60 
   0   0  -4  749.54   34.04 
   0   0  -4  838.35   35.01 
   0   0  -4  745.68   33.93 
   0   0  -4  808.64   33.72 
   0   0  -4  792.63   34.86 
   0   0   4  757.18   33.87 
   0   0   4  824.19   34.94 
   0   0   4  734.65   34.77 
   0   0   4  763.29   33.94 
   0   0   4  771.83   33.71 
  -1   0  -4  669.82   31.15 
  -1   0  -4  752.33   31.98 
  -1   0  -4  705.00   31.20 
  -1   0  -4  750.00   31.89 
  -1   0  -4  711.90   31.06 
   1   0   4  718.91   30.99 
   1   0   4  718.90   31.75 
   1   0   4  677.68   31.15 
   1   0   4  710.96   32.16 
  -2   0  -4 2598.30  108.93 
  -2   0  -4 2425.37  109.53 
  -2   0  -4 2789.53  109.14 
  -2   0  -4 2523.11  109.51 
  -2   0  -4 2469.23  109.16 
   2   0   4 2439.11  108.90 
   2   0   4 2585.13  109.31 
   2   0   4 2402.65  109.05 
   2   0   4 2535.78  109.22 
  -3   0  -4  971.93   41.32 
  -3   0  -4  944.46   41.49 
  -3   0  -4  962.63   41.77 
  -3   0  -4  928.79   41.35 
  -3   0  -4  889.81   41.61 
  -3   0  -4  965.96   41.68 
   3   0   4 1004.98   41.34 
   3   0   4  959.66   41.38 
  -4   0  -4  821.21   36.20 
  -4   0  -4  847.97   36.30 
  -4   0  -4  838.13   36.50 
  -4   0  -4  822.93   36.32 
  -4   0  -4  791.47   36.32 
   4   0   4  870.04   36.38 
  -5   0  -4  795.84   32.79 
  -5   0  -4  748.01   33.26 
  -5   0  -4  693.69   33.21 
  -5   0  -4  744.23   33.12 
  -5   0  -4  789.44   33.10 
  -6   0  -4 2085.98   92.91 
  -6   0  -4 2355.32   92.64 
  -6   0  -4 2326.16   93.11 
  -6   0  -4 2079.95   93.21 
  -6   0  -4 1943.08   92.48 
  -6   0  -4 2090.61   92.89 
  -7   0  -4  654.85   29.48 
  -7   0  -4  676.22   29.47 
  -7   0  -4  664.96   29.94 
  -7   0  -4  607.28   28.61 
  -7   0  -4  701.30   28.68 
   7   0   4  675.27   29.53 
  -8   0  -4 1117.10   50.79 
  -8   0  -4 1140.97   51.37 
  -8   0  -4 1190.87   49.99 
   8   0   4 1173.69   50.77 
   8   0   4 1151.45   50.72 
  -9   0  -4  304.20   15.68 
  -9   0  -4  318.25   14.07 
   9   0   4  315.70   14.85 
   9   0   4  299.89   15.04 
   9   0   4  309.99   14.79 
 -10   0  -4  396.79   17.79 
 -10   0  -4  322.87   15.67 
 -10   0  -4  320.89   15.42 
  10   0   4  351.19   16.41 
  10   0   4  351.58   16.31 
  10   0   4  337.38   16.69 
  11   0   4  109.54    7.74 
  11   0   4  101.91    7.09 
   9  -1  -4  722.16   33.55 
   9  -1  -4  748.56   33.94 
  -9   1   4  770.31   36.41 
  -9   1   4  691.49   34.83 
   8  -1  -4  486.21   22.92 
   8  -1  -4  492.88   23.20 
  -8   1   4  464.11   24.02 
  -8   1   4  513.82   25.54 
   7  -1  -4  337.33   15.98 
   7  -1  -4  340.24   16.38 
   7  -1  -4  328.06   15.35 
  -7   1   4  366.43   17.38 
  -7   1   4  317.45   18.24 
   6  -1  -4  553.30   25.71 
   6  -1  -4  540.44   25.57 
   6  -1  -4  566.01   25.03 
  -6   1   4  589.98   27.59 
  -6   1   4  573.43   26.27 
   5  -1  -4  379.97   16.52 
   5  -1  -4  376.67   16.91 
   5  -1  -4  375.53   16.96 
  -5   1   4  334.81   18.51 
  -5   1   4  372.38   17.62 
  -5   1   4  362.08   18.55 
   4  -1  -4  230.58   10.89 
   4  -1  -4  227.66   11.00 
   4  -1  -4  246.78   12.46 
   4  -1  -4  231.81   10.60 
  -4   1   4  198.04   11.32 
  -4   1   4  250.64   12.71 
  -4   1   4  224.38   12.40 
   3  -1  -4 1421.33   60.66 
   3  -1  -4 1383.65   60.83 
   3  -1  -4 1438.22   60.90 
   3  -1  -4 1290.78   62.05 
  -3   1   4 1410.46   62.13 
  -3   1   4 1457.09   61.22 
   2  -1  -4 1671.65   79.56 
   2  -1  -4 1998.34   81.12 
   2  -1  -4 1877.90   79.57 
   2  -1  -4 1729.55   79.69 
  -2   1   4 1862.39   79.86 
  -2   1   4 2040.66   81.18 
  -2   1   4 1714.12   80.65 
   1  -1  -4  241.77   12.26 
   1  -1  -4  266.95   12.39 
   1  -1  -4  280.44   12.57 
   1  -1  -4  291.87   13.76 
   1  -1  -4  290.42   12.50 
  -1   1   4  286.17   12.32 
  -1   1   4  266.47   12.44 
  -1   1   4  248.60   13.35 
  -1   1   4  310.24   12.71 
  -1   1   4  274.53   13.59 
   0  -1  -4 2549.31  119.22 
   0  -1  -4 2716.53  118.48 
   0  -1  -4 2873.06  118.27 
   0  -1  -4 2571.08  118.24 
   0  -1  -4 2659.00  119.18 
   0  -1  -4 2812.66  118.43 
   0   1   4 2621.08  118.40 
   0   1   4 2984.89  118.70 
   0   1   4 2711.06  119.18 
   0   1   4 2944.48  119.37 
   0   1   4 2774.16  118.19 
  -1  -1  -4 2156.12   89.73 
  -1  -1  -4 2127.97   89.09 
  -1  -1  -4 1957.76   89.01 
  -1  -1  -4 1987.84   88.75 
  -1  -1  -4 2008.57   89.64 
  -1  -1  -4 2031.00   89.30 
   1   1   4 2078.78   88.71 
   1   1   4 2002.43   89.01 
   1   1   4 1967.07   89.55 
   1   1   4 2298.94   89.41 
  -2  -1  -4 1653.12   72.42 
  -2  -1  -4 1737.98   71.95 
  -2  -1  -4 1547.26   72.03 
  -2  -1  -4 1723.24   72.41 
   2   1   4 1723.77   71.91 
   2   1   4 1630.20   71.64 
   2   1   4 1633.17   71.64 
  -3  -1  -4 2307.60   98.80 
  -3  -1  -4 2286.81   99.24 
  -3  -1  -4 2301.43   99.32 
  -3  -1  -4 2203.06   99.00 
   3   1   4 2360.75   98.82 
   3   1   4 2304.82   98.93 
   3   1   4 2299.12   98.91 
   3   1   4 2300.76   99.31 
  -4  -1  -4 2518.44  106.76 
  -4  -1  -4 2505.67  107.11 
  -4  -1  -4 2392.23  106.88 
  -4  -1  -4 2358.42  107.79 
  -4  -1  -4 2390.32  106.87 
   4   1   4 2577.30  106.77 
   4   1   4 2473.34  106.94 
   4   1   4 2609.84  107.02 
  -5  -1  -4 1308.67   55.50 
  -5  -1  -4 1412.20   55.16 
  -5  -1  -4 1157.22   55.36 
  -5  -1  -4 1167.16   55.61 
   5   1   4 1336.79   55.74 
  -6  -1  -4 1175.58   51.82 
  -6  -1  -4 1233.14   51.86 
  -6  -1  -4 1162.42   52.00 
  -7  -1  -4  472.43   21.48 
  -7  -1  -4  485.32   21.62 
  -8  -1  -4  221.39    9.51 
   8   1   4  209.73   10.55 
   8   1   4  208.13   10.32 
   8   1   4  202.86   10.49 
   9   1   4   78.91    6.54 
   9   1   4   84.27    5.75 
   9   1   4   85.57    5.31 
   9   1   4   77.97    5.26 
 -10  -1  -4  409.07   16.84 
  10   1   4  358.67   17.40 
  10   1   4  352.96   17.44 
  10   1   4  359.13   17.85 
  10   1   4  361.63   18.74 
 -11  -1  -4  250.71   11.48 
  11   1   4  228.81   12.32 
  11   1   4  239.71   12.99 
  11   1   4  247.24   14.05 
   9  -2  -4   90.67    6.62 
   9  -2  -4   99.79    7.84 
  -9   2   4   91.56   10.36 
  -9   2   4   97.62    9.09 
   8  -2  -4  118.44    7.42 
   8  -2  -4  113.89    7.21 
  -8   2   4  120.17   10.44 
  -8   2   4  123.09    9.28 
   7  -2  -4   70.33    5.88 
   7  -2  -4   69.92    4.76 
   7  -2  -4   66.45    5.65 
  -7   2   4   64.80    6.68 
  -7   2   4   80.38    7.68 
   6  -2  -4  230.01   11.71 
   6  -2  -4  246.23   11.06 
   6  -2  -4  241.46   11.72 
  -6   2   4  215.15   13.23 
  -6   2   4  227.07   12.14 
   5  -2  -4  602.91   25.70 
   5  -2  -4  588.11   26.08 
   5  -2  -4  576.56   26.05 
  -5   2   4  548.50   27.48 
  -5   2   4  574.59   26.68 
   4  -2  -4  688.73   29.17 
   4  -2  -4  652.54   28.83 
   4  -2  -4  654.18   29.01 
   4  -2  -4  589.43   30.35 
  -4   2   4  701.43   29.63 
  -4   2   4  629.75   30.65 
  -4   2   4  667.08   30.52 
   3  -2  -4  530.68   24.67 
   3  -2  -4  539.04   23.04 
   3  -2  -4  533.07   23.19 
   3  -2  -4  529.56   23.11 
  -3   2   4  498.26   23.53 
  -3   2   4  523.57   24.69 
  -3   2   4  483.88   24.32 
   2  -2  -4 1530.06   65.62 
   2  -2  -4 1520.19   65.68 
   2  -2  -4 1543.48   65.78 
   2  -2  -4 1466.83   66.99 
  -2   2   4 1536.87   66.82 
  -2   2   4 1435.86   65.91 
  -2   2   4 1575.76   67.16 
   1  -2  -4 2764.53  122.31 
   1  -2  -4 2863.61  120.59 
   1  -2  -4 2745.66  120.78 
   1  -2  -4 2781.08  120.76 
   1  -2  -4 2786.70  121.90 
  -1   2   4 2748.04  121.89 
  -1   2   4 3025.43  121.84 
  -1   2   4 2685.19  120.80 
   0  -2  -4  285.02   12.86 
   0  -2  -4  247.23   11.79 
   0  -2  -4  252.71   11.76 
   0  -2  -4  256.01   11.42 
   0  -2  -4  261.17   11.45 
   0  -2  -4  247.20   12.58 
   0  -2  -4  253.66   11.77 
   0   2   4  273.56   12.66 
   0   2   4  295.34   12.89 
   0   2   4  224.67   11.60 
  -1  -2  -4 3129.90  143.17 
  -1  -2  -4 3235.28  143.87 
  -1  -2  -4 3432.38  143.32 
  -1  -2  -4 3298.56  143.66 
  -1  -2  -4 3112.05  143.81 
  -1  -2  -4 3388.46  143.24 
   1   2   4 3366.07  143.83 
   1   2   4 3391.23  143.18 
   1   2   4 3474.27  143.07 
   1   2   4 3414.24  143.31 
  -2  -2  -4 1059.58   48.10 
  -2  -2  -4 1068.16   49.06 
  -2  -2  -4 1202.84   48.54 
  -2  -2  -4 1142.33   48.78 
   2   2   4 1044.99   48.94 
   2   2   4 1228.79   48.53 
   2   2   4 1073.81   48.51 
   2   2   4 1135.40   48.23 
  -3  -2  -4 1193.64   48.64 
  -3  -2  -4 1140.48   48.56 
  -3  -2  -4 1093.55   47.87 
  -3  -2  -4 1114.69   48.44 
   3   2   4 1106.46   48.13 
   3   2   4 1099.19   48.19 
   3   2   4 1030.39   47.86 
  -4  -2  -4  813.03   35.92 
  -4  -2  -4  799.42   35.89 
  -4  -2  -4  860.66   35.57 
  -4  -2  -4  747.84   35.94 
   4   2   4  847.22   35.55 
   4   2   4  850.66   35.93 
  -5  -2  -4  825.65   36.46 
  -5  -2  -4  809.33   36.45 
  -5  -2  -4  805.42   36.73 
  -5  -2  -4  840.30   36.47 
   5   2   4  850.01   36.84 
   5   2   4  888.06   36.47 
  -6  -2  -4  435.26   20.15 
  -6  -2  -4  469.38   20.72 
  -6  -2  -4  485.34   20.23 
  -6  -2  -4  409.12   20.34 
   6   2   4  484.14   21.01 
   6   2   4  476.76   20.49 
  -7  -2  -4  875.60   40.42 
  -7  -2  -4  925.16   40.50 
  -7  -2  -4  882.21   40.99 
   7   2   4  969.29   41.00 
   7   2   4  972.42   41.57 
   7   2   4  982.69   40.84 
  -8  -2  -4  410.13   17.84 
   8   2   4  404.42   18.24 
   8   2   4  403.95   19.20 
   8   2   4  387.69   18.49 
  -9  -2  -4  301.33   13.58 
  -9  -2  -4  272.30   13.55 
   9   2   4  312.31   14.52 
   9   2   4  303.07   14.06 
   9   2   4  298.79   14.09 
   9   2   4  325.38   15.43 
 -10  -2  -4   47.70    3.43 
 -10  -2  -4   45.73    3.66 
  10   2   4   46.25    4.13 
  10   2   4   48.17    5.07 
  10   2   4   38.18    4.31 
  10   2   4   40.28    4.81 
 -11  -2  -4   83.40    5.05 
  11   2   4   81.68    6.67 
  11   2   4   79.22    7.77 
  11   2   4   82.11    6.18 
   9  -3  -4   80.67    7.34 
   9  -3  -4   69.21    6.99 
  -9   3   4   75.76    9.01 
  -9   3   4   74.36    8.67 
   8  -3  -4  124.08    8.50 
   8  -3  -4  138.56    8.52 
  -8   3   4  128.94   10.46 
  -8   3   4  123.57    9.64 
   7  -3  -4  110.07    6.87 
   7  -3  -4  105.93    7.37 
   7  -3  -4  109.44    6.68 
  -7   3   4  123.72    9.43 
  -7   3   4  122.63    8.59 
   6  -3  -4  367.58   17.85 
   6  -3  -4  368.91   17.41 
   6  -3  -4  366.83   17.86 
  -6   3   4  422.72   18.98 
  -6   3   4  376.69   19.65 
   5  -3  -4  562.27   26.35 
   5  -3  -4  589.14   26.17 
   5  -3  -4  597.00   26.40 
  -5   3   4  599.98   28.17 
  -5   3   4  581.49   27.16 
   4  -3  -4  372.87   17.10 
   4  -3  -4  376.94   17.34 
   4  -3  -4  397.79   18.94 
   4  -3  -4  374.62   17.11 
  -4   3   4  362.42   19.09 
  -4   3   4  367.19   18.66 
  -4   3   4  381.88   17.94 
   3  -3  -4 1060.83   46.00 
   3  -3  -4 1125.85   47.75 
   3  -3  -4 1022.38   46.07 
   3  -3  -4 1080.74   45.95 
  -3   3   4 1021.49   47.59 
  -3   3   4  972.65   46.35 
  -3   3   4 1084.74   47.38 
   2  -3  -4 1055.73   44.96 
   2  -3  -4 1112.66   46.49 
   2  -3  -4 1044.64   44.98 
   2  -3  -4 1046.69   44.77 
  -2   3   4  946.05   46.20 
  -2   3   4  992.32   45.20 
  -2   3   4 1008.98   46.04 
   1  -3  -4 2157.01   97.45 
   1  -3  -4 2338.65   97.80 
   1  -3  -4 2405.00   97.56 
   1  -3  -4 2166.32   97.70 
   1  -3  -4 2144.90   98.83 
  -1   3   4 2292.70   98.72 
  -1   3   4 2328.97   97.92 
   0  -3  -4  225.39    9.66 
   0  -3  -4  229.24   10.19 
   0  -3  -4  206.32    9.62 
   0  -3  -4  207.55   10.92 
   0  -3  -4  216.39   10.04 
   0  -3  -4  232.64   10.68 
   0   3   4  192.40   10.79 
   0   3   4  233.30   10.16 
  -1  -3  -4 1133.40   48.16 
  -1  -3  -4 1071.51   48.62 
  -1  -3  -4 1206.17   49.52 
  -1  -3  -4 1104.02   49.48 
  -1  -3  -4 1145.00   48.92 
  -1  -3  -4 1068.81   48.75 
  -1  -3  -4 1046.97   48.14 
   1   3   4 1193.96   48.73 
   1   3   4 1117.64   49.33 
   1   3   4 1109.76   48.53 
  -2  -3  -4  371.32   18.60 
  -2  -3  -4  392.61   18.26 
  -2  -3  -4  431.97   18.27 
  -2  -3  -4  400.30   17.99 
  -2  -3  -4  452.35   18.92 
   2   3   4  401.74   18.16 
   2   3   4  391.35   18.56 
   2   3   4  410.18   17.94 
  -3  -3  -4  555.39   24.04 
  -3  -3  -4  554.99   23.73 
  -3  -3  -4  584.66   24.15 
  -3  -3  -4  510.28   23.72 
  -3  -3  -4  523.20   23.34 
   3   3   4  514.29   23.75 
   3   3   4  516.67   23.34 
   3   3   4  491.19   23.01 
   3   3   4  539.16   23.63 
   3   3   4  547.97   23.06 
  -4  -3  -4  940.76   38.90 
  -4  -3  -4  862.36   38.27 
  -4  -3  -4  799.04   38.71 
  -4  -3  -4  804.72   38.67 
   4   3   4  930.51   38.14 
   4   3   4  910.72   38.19 
   4   3   4  906.91   38.30 
   4   3   4  896.26   38.70 
  -5  -3  -4  349.11   15.75 
  -5  -3  -4  389.18   16.29 
  -5  -3  -4  329.79   16.07 
  -5  -3  -4  350.62   16.18 
   5   3   4  364.42   16.36 
   5   3   4  354.65   15.77 
  -6  -3  -4  217.01   10.59 
  -6  -3  -4  242.22   10.44 
  -6  -3  -4  246.73   10.89 
  -6  -3  -4  213.20   10.69 
   6   3   4  216.06   11.11 
   6   3   4  234.05   10.56 
  -7  -3  -4  124.09    6.25 
  -7  -3  -4  119.16    6.30 
   7   3   4  119.33    6.53 
   7   3   4  122.09    6.16 
   7   3   4  123.42    7.20 
  -8  -3  -4  258.10   12.98 
  -8  -3  -4  277.45   13.00 
  -8  -3  -4  304.41   13.34 
   8   3   4  281.21   14.11 
   8   3   4  279.46   12.96 
   8   3   4  287.98   13.43 
  -9  -3  -4  252.23   12.07 
  -9  -3  -4  252.38   12.04 
   9   3   4  259.39   13.51 
   9   3   4  255.88   11.98 
   9   3   4  249.92   12.11 
   9   3   4  255.14   12.55 
 -10  -3  -4  512.13   25.52 
 -10  -3  -4  601.26   25.54 
  10   3   4  586.95   27.06 
  10   3   4  583.22   26.09 
  10   3   4  551.28   25.46 
 -11  -3  -4  311.02   14.68 
  11   3   4  304.25   16.62 
  11   3   4  300.25   15.47 
   9  -4  -4   89.05    6.68 
   9  -4  -4   80.66    7.57 
  -9   4   4   84.53    7.84 
  -9   4   4   81.18    9.54 
   8  -4  -4   80.41    6.04 
   8  -4  -4   86.86    7.07 
   8  -4  -4   68.54    6.78 
  -8   4   4   84.47    7.22 
  -8   4   4   84.13    9.00 
   7  -4  -4  948.43   40.94 
   7  -4  -4  909.51   41.16 
   7  -4  -4  917.57   41.28 
  -7   4   4  922.76   42.17 
  -7   4   4  902.65   43.21 
   6  -4  -4  264.99   12.95 
   6  -4  -4  257.09   13.06 
   6  -4  -4  280.76   13.10 
  -6   4   4  260.61   14.31 
  -6   4   4  275.37   15.20 
   5  -4  -4  678.28   30.64 
   5  -4  -4  658.80   30.70 
   5  -4  -4  665.61   30.81 
  -5   4   4  727.55   31.63 
  -5   4   4  706.39   32.54 
   4  -4  -4 1399.77   62.26 
   4  -4  -4 1475.34   62.25 
   4  -4  -4 1444.64   62.19 
   4  -4  -4 1518.64   64.18 
  -4   4   4 1411.53   63.75 
  -4   4   4 1304.67   62.77 
   3  -4  -4  556.97   25.12 
   3  -4  -4  559.37   25.33 
   3  -4  -4  563.91   26.95 
   3  -4  -4  567.77   25.38 
  -3   4   4  578.24   27.09 
  -3   4   4  622.44   25.91 
  -3   4   4  525.82   26.62 
   2  -4  -4  902.35   40.36 
   2  -4  -4  905.37   40.58 
   2  -4  -4  991.32   40.71 
   2  -4  -4 1009.63   42.25 
  -2   4   4  871.75   40.89 
  -2   4   4  926.41   42.12 
  -2   4   4  879.72   41.76 
   1  -4  -4   97.17    6.76 
   1  -4  -4   99.72    5.49 
   1  -4  -4  108.35    5.36 
  -1   4   4  105.27    5.72 
  -1   4   4   91.69    6.17 
  -1   4   4  106.52    7.35 
   0  -4  -4  231.46    9.81 
   0  -4  -4  224.83   10.41 
   0  -4  -4  218.72   11.27 
   0  -4  -4  199.33   11.37 
   0  -4  -4  213.87   10.13 
   0   4   4  219.73   10.48 
   0   4   4  227.31   11.30 
   0   4   4  218.84    9.76 
  -1  -4  -4  896.91   40.15 
  -1  -4  -4  864.22   39.24 
  -1  -4  -4  847.89   39.01 
  -1  -4  -4  916.02   38.65 
  -1  -4  -4  862.12   39.97 
   1   4   4  933.65   39.37 
   1   4   4  949.10   40.04 
  -2  -4  -4  673.22   33.09 
  -2  -4  -4  760.39   32.68 
  -2  -4  -4  792.23   32.37 
  -2  -4  -4  685.27   33.22 
   2   4   4  761.19   33.12 
   2   4   4  746.83   32.19 
   2   4   4  764.87   32.71 
  -3  -4  -4   29.09    2.00 
  -3  -4  -4   25.06    3.02 
  -3  -4  -4   30.22    3.50 
  -3  -4  -4   23.91    2.74 
   3   4   4   27.14    1.43 
   3   4   4   29.66    1.40 
   3   4   4   29.05    2.66 
   3   4   4   28.45    2.75 
   3   4   4   31.31    1.97 
  -4  -4  -4  153.73    7.41 
  -4  -4  -4  145.30    8.28 
  -4  -4  -4  162.28    8.52 
  -4  -4  -4  159.47    8.15 
   4   4   4  177.76    7.32 
   4   4   4  172.55    7.96 
   4   4   4  168.79    7.48 
   4   4   4  166.68    7.43 
   4   4   4  155.46    8.12 
  -5  -4  -4  435.42   18.15 
  -5  -4  -4  427.43   18.99 
  -5  -4  -4  398.28   19.01 
  -5  -4  -4  399.65   18.74 
   5   4   4  400.15   18.27 
   5   4   4  403.61   18.17 
   5   4   4  417.64   18.97 
   5   4   4  418.19   18.17 
  -6  -4  -4  698.87   30.99 
  -6  -4  -4  718.75   31.80 
  -6  -4  -4  699.68   31.65 
   6   4   4  731.24   31.98 
   6   4   4  708.87   31.25 
  -7  -4  -4  347.24   15.85 
  -7  -4  -4  343.54   16.04 
  -7  -4  -4  319.45   15.90 
   7   4   4  336.83   16.47 
   7   4   4  345.67   15.29 
   7   4   4  361.70   15.77 
  -8  -4  -4  137.29    7.86 
  -8  -4  -4  146.35    7.91 
  -8  -4  -4  136.22    7.69 
   8   4   4  157.42    7.97 
   8   4   4  160.27    8.93 
   8   4   4  147.80    7.25 
  -9  -4  -4  492.59   23.26 
  -9  -4  -4  547.37   23.03 
  -9  -4  -4  496.48   23.27 
   9   4   4  504.74   22.74 
   9   4   4  504.70   24.27 
   9   4   4  509.64   23.33 
 -10  -4  -4  248.25   12.34 
  10   4   4  248.44   13.73 
  10   4   4  235.58   12.48 
 -11  -4  -4  290.66   14.42 
  11   4   4  295.10   14.88 
  11   4   4  285.24   16.10 
   8  -5  -4  642.40   29.45 
   8  -5  -4  675.88   29.86 
   8  -5  -4  646.41   29.80 
  -8   5   4  656.61   32.38 
  -8   5   4  601.56   31.10 
   7  -5  -4  371.30   17.84 
   7  -5  -4  363.91   17.75 
   7  -5  -4  354.54   17.63 
  -7   5   4  385.22   20.28 
  -7   5   4  383.59   19.41 
   6  -5  -4  611.07   28.05 
   6  -5  -4  600.93   28.24 
   6  -5  -4  629.69   28.08 
  -6   5   4  643.56   29.23 
  -6   5   4  611.24   30.35 
   5  -5  -4  479.95   21.88 
   5  -5  -4  469.09   21.87 
   5  -5  -4  462.24   21.85 
  -5   5   4  504.29   22.83 
  -5   5   4  472.55   23.81 
   4  -5  -4   84.51    5.22 
   4  -5  -4   79.61    5.30 
   4  -5  -4   86.35    5.57 
  -4   5   4   93.56    7.51 
  -4   5   4   94.71    6.58 
   3  -5  -4  605.97   27.96 
   3  -5  -4  632.15   29.78 
   3  -5  -4  621.33   28.04 
  -3   5   4  637.69   27.80 
  -3   5   4  630.24   29.56 
  -3   5   4  631.96   28.61 
   2  -5  -4  352.69   17.21 
   2  -5  -4  382.04   18.92 
   2  -5  -4  372.82   17.12 
  -2   5   4  387.63   19.86 
  -2   5   4  395.83   18.78 
  -2   5   4  389.24   16.97 
  -2   5   4  364.73   17.72 
   1  -5  -4  146.54    8.66 
   1  -5  -4  137.77    7.22 
   1  -5  -4  142.93    7.52 
  -1   5   4  149.22    6.90 
  -1   5   4  151.28    8.78 
  -1   5   4  147.17    7.81 
   0  -5  -4 1210.16   47.24 
   0  -5  -4 1113.20   47.43 
   0  -5  -4 1000.56   47.62 
   0  -5  -4 1039.52   48.82 
   0   5   4 1067.42   47.90 
   0   5   4 1116.78   47.13 
   0   5   4 1071.77   48.60 
  -1  -5  -4  130.55    7.89 
  -1  -5  -4  132.99    6.63 
  -1  -5  -4  137.34    8.20 
  -1  -5  -4  150.50    6.33 
  -1  -5  -4  128.38    6.86 
   1   5   4  124.31    7.17 
   1   5   4  142.06    6.17 
   1   5   4  140.57    7.88 
  -2  -5  -4 2517.33  105.68 
  -2  -5  -4 2192.03  105.33 
  -2  -5  -4 2472.86  103.97 
  -2  -5  -4 2404.77  104.32 
  -2  -5  -4 2451.64  104.73 
   2   5   4 2343.68  104.83 
   2   5   4 2532.27  104.19 
   2   5   4 2455.06  104.14 
   2   5   4 2390.42  105.30 
  -3  -5  -4  554.19   23.82 
  -3  -5  -4  586.31   24.78 
  -3  -5  -4  496.05   25.16 
  -3  -5  -4  522.00   25.37 
  -3  -5  -4  538.66   24.05 
   3   5   4  494.59   24.96 
   3   5   4  608.80   23.85 
   3   5   4  570.74   24.89 
   3   5   4  586.83   24.00 
  -4  -5  -4  673.35   31.93 
  -4  -5  -4  690.59   33.13 
  -4  -5  -4  723.74   32.73 
  -4  -5  -4  815.84   33.54 
   4   5   4  779.00   31.95 
   4   5   4  757.54   32.91 
   4   5   4  727.51   31.97 
   4   5   4  792.41   32.06 
   4   5   4  685.18   32.73 
  -5  -5  -4  927.20   38.51 
  -5  -5  -4  783.75   39.57 
  -5  -5  -4  950.16   39.95 
  -5  -5  -4  883.79   39.33 
   5   5   4  903.37   38.80 
   5   5   4  889.31   39.57 
   5   5   4  940.16   38.66 
   5   5   4  846.58   38.55 
  -6  -5  -4  472.32   21.43 
  -6  -5  -4  431.37   21.40 
   6   5   4  491.10   21.56 
   6   5   4  448.64   20.60 
   6   5   4  449.29   20.22 
   6   5   4  479.19   20.16 
  -7  -5  -4  157.12    8.73 
  -7  -5  -4  167.06    8.99 
  -7  -5  -4  168.75    8.18 
   7   5   4  161.02    9.09 
   7   5   4  149.36    7.36 
   7   5   4  150.83    8.03 
  -8  -5  -4  783.28   36.43 
  -8  -5  -4  799.33   36.35 
  -8  -5  -4  771.71   35.74 
   8   5   4  823.95   36.81 
   8   5   4  863.31   35.92 
  -9  -5  -4  304.40   15.35 
   9   5   4  309.89   16.13 
   9   5   4  318.77   15.11 
 -10  -5  -4  107.63    7.50 
  10   5   4  126.23    7.71 
  10   5   4  112.55    7.96 
 -11  -5  -4  433.04   20.48 
  11   5   4  419.13   21.35 
  11   5   4  411.90   20.35 
   8  -6  -4  295.28   15.14 
   8  -6  -4  311.48   15.72 
   8  -6  -4  302.88   15.73 
  -8   6   4  304.32   18.21 
  -8   6   4  288.85   16.53 
   7  -6  -4  294.61   15.34 
   7  -6  -4  292.27   15.43 
   7  -6  -4  302.38   15.15 
  -7   6   4  326.56   18.06 
  -7   6   4  308.12   16.97 
   6  -6  -4  174.41    9.54 
   6  -6  -4  173.34    9.75 
   6  -6  -4  177.81    9.75 
  -6   6   4  187.71   12.30 
  -6   6   4  172.81   11.18 
   5  -6  -4  276.63   14.26 
   5  -6  -4  280.64   14.34 
   5  -6  -4  292.37   14.19 
  -5   6   4  307.97   15.49 
  -5   6   4  307.92   16.58 
   4  -6  -4  405.68   18.70 
   4  -6  -4  399.57   18.76 
  -4   6   4  412.81   18.45 
  -4   6   4  377.79   19.54 
  -4   6   4  414.63   20.72 
   3  -6  -4  127.14    7.15 
   3  -6  -4  127.58    8.91 
   3  -6  -4  119.14    6.92 
  -3   6   4  117.34    7.76 
  -3   6   4  129.58    8.88 
  -3   6   4  123.54    6.62 
   2  -6  -4  105.46    7.95 
   2  -6  -4  122.40    6.12 
   2  -6  -4  101.64    6.31 
  -2   6   4  106.37    6.92 
  -2   6   4  107.18    7.83 
  -2   6   4  106.12    5.65 
   1  -6  -4  799.57   36.49 
   1  -6  -4  835.03   36.83 
   1  -6  -4  799.30   38.28 
  -1   6   4  834.38   37.99 
  -1   6   4  827.59   36.25 
  -1   6   4  892.11   37.25 
   0  -6  -4  952.08   42.09 
   0  -6  -4  912.65   40.63 
   0   6   4  879.89   39.97 
   0   6   4  911.19   41.72 
   0   6   4  954.07   41.01 
  -1  -6  -4  296.09   13.82 
  -1  -6  -4  312.62   14.37 
  -1  -6  -4  300.44   15.36 
  -1  -6  -4  318.03   13.72 
  -1  -6  -4  310.93   15.65 
   1   6   4  297.62   15.26 
   1   6   4  306.24   13.51 
   1   6   4  305.92   14.64 
  -2  -6  -4  555.07   26.35 
  -2  -6  -4  588.04   25.70 
  -2  -6  -4  577.89   27.31 
  -2  -6  -4  639.74   27.71 
  -2  -6  -4  584.04   25.87 
   2   6   4  573.16   27.11 
   2   6   4  595.59   25.53 
   2   6   4  582.73   25.63 
   2   6   4  602.32   26.72 
  -3  -6  -4 1847.60   77.60 
  -3  -6  -4 1945.62   77.71 
  -3  -6  -4 1928.01   79.55 
  -3  -6  -4 1674.91   79.13 
  -3  -6  -4 1821.21   78.44 
   3   6   4 1836.85   77.54 
   3   6   4 1718.31   77.54 
   3   6   4 1599.16   78.78 
   3   6   4 1842.74   78.72 
  -4  -6  -4  946.22   41.52 
  -4  -6  -4  910.46   43.13 
  -4  -6  -4 1011.04   43.17 
  -4  -6  -4  924.26   42.33 
   4   6   4 1053.85   41.61 
   4   6   4  935.76   41.33 
   4   6   4  965.38   42.58 
   4   6   4  928.88   42.63 
  -5  -6  -4 1513.92   70.32 
  -5  -6  -4 1565.53   70.49 
  -5  -6  -4 1621.23   69.81 
   5   6   4 1590.49   68.63 
   5   6   4 1643.65   69.13 
   5   6   4 1696.20   70.15 
   5   6   4 1557.35   68.62 
  -6  -6  -4  723.46   33.39 
  -6  -6  -4  678.99   32.52 
  -6  -6  -4  692.93   33.23 
   6   6   4  729.35   31.49 
   6   6   4  742.91   33.14 
   6   6   4  814.66   32.25 
  -7  -6  -4  489.13   24.99 
  -7  -6  -4  573.00   24.37 
   7   6   4  537.97   24.98 
   7   6   4  549.18   24.08 
  -8  -6  -4  535.74   25.24 
  -8  -6  -4  561.87   24.23 
   8   6   4  510.37   24.25 
   8   6   4  527.41   25.31 
  -9  -6  -4  431.57   21.39 
   9   6   4  452.62   21.88 
   9   6   4  445.21   20.59 
 -10  -6  -4  200.24   11.54 
  10   6   4  189.87   10.77 
  10   6   4  195.97   12.19 
 -11  -6  -4   15.58    4.01 
  11   6   4   17.15    5.38 
   7  -7  -4  193.15   10.70 
   7  -7  -4  195.82   11.08 
   7  -7  -4  201.66   11.44 
  -7   7   4  192.89   14.38 
  -7   7   4  211.82   13.17 
   6  -7  -4   91.41    5.86 
   6  -7  -4   78.14    6.53 
   6  -7  -4   73.34    6.26 
  -6   7   4   73.89    6.85 
  -6   7   4   78.96    9.65 
   5  -7  -4  276.13   13.61 
   5  -7  -4  249.71   13.43 
  -5   7   4  281.02   16.01 
  -5   7   4  260.99   14.25 
  -5   7   4  273.02   13.26 
   4  -7  -4   48.44    4.11 
   4  -7  -4   40.69    3.87 
  -4   7   4   45.41    6.86 
  -4   7   4   49.96    4.29 
  -4   7   4   41.41    5.74 
   3  -7  -4 1050.16   46.80 
   3  -7  -4 1013.67   46.99 
  -3   7   4 1094.09   48.85 
  -3   7   4 1032.56   47.67 
  -3   7   4 1116.43   46.65 
   2  -7  -4  159.66    8.70 
   2  -7  -4  167.33    8.61 
   2  -7  -4  176.34   10.97 
  -2   7   4  171.54    8.29 
  -2   7   4  169.71    9.32 
  -2   7   4  164.98   10.64 
   1  -7  -4  706.72   31.66 
   1  -7  -4  684.91   31.29 
   1  -7  -4  706.28   33.45 
  -1   7   4  761.70   31.12 
  -1   7   4  699.89   32.11 
  -1   7   4  683.14   33.04 
   0  -7  -4 1198.78   55.82 
   0  -7  -4 1288.14   57.54 
   0  -7  -4 1271.32   55.46 
   0   7   4 1287.84   57.19 
   0   7   4 1260.69   56.34 
   0   7   4 1333.30   55.25 
  -1  -7  -4 1512.39   66.63 
  -1  -7  -4 1410.98   67.84 
  -1  -7  -4 1546.11   66.09 
   1   7   4 1577.10   65.85 
   1   7   4 1477.57   66.97 
   1   7   4 1616.55   67.86 
  -2  -7  -4 1128.84   54.97 
  -2  -7  -4 1228.89   53.39 
  -2  -7  -4 1199.66   53.99 
  -2  -7  -4 1212.90   55.35 
  -2  -7  -4 1254.11   53.42 
   2   7   4 1314.14   53.18 
   2   7   4 1237.17   54.42 
   2   7   4 1277.55   55.04 
   2   7   4 1211.78   53.15 
  -3  -7  -4  346.86   15.99 
  -3  -7  -4  355.58   17.44 
  -3  -7  -4  314.30   16.94 
  -3  -7  -4  322.09   15.07 
  -3  -7  -4  352.30   15.20 
   3   7   4  345.22   16.89 
   3   7   4  328.45   14.90 
   3   7   4  322.82   16.47 
   3   7   4  385.29   15.12 
  -4  -7  -4  501.12   21.37 
  -4  -7  -4  498.06   23.59 
  -4  -7  -4  483.11   23.22 
  -4  -7  -4  489.75   22.22 
   4   7   4  479.95   22.70 
   4   7   4  508.05   22.87 
   4   7   4  446.93   21.32 
  -5  -7  -4  612.51   28.14 
  -5  -7  -4  592.56   29.05 
   5   7   4  641.11   27.33 
   5   7   4  640.86   28.59 
  -6  -7  -4  331.27   16.81 
  -6  -7  -4  322.57   15.83 
   6   7   4  326.55   16.40 
   6   7   4  342.57   15.14 
  -7  -7  -4  930.00   42.13 
  -7  -7  -4  968.48   43.35 
   7   7   4  972.72   41.88 
   7   7   4  930.31   42.87 
  -8  -7  -4  196.43   11.76 
  -8  -7  -4  212.27   10.39 
   8   7   4  209.62   10.44 
   8   7   4  201.89   11.81 
  -9  -7  -4  355.54   18.58 
   9   7   4  381.09   18.58 
   9   7   4  361.51   17.42 
 -10  -7  -4  194.41   11.86 
  10   7   4  182.40   11.42 
   7  -8  -4  240.37   12.34 
   7  -8  -4  223.44   12.24 
   7  -8  -4  227.69   12.90 
  -7   8   4  231.49   15.81 
  -7   8   4  238.26   14.80 
   6  -8  -4   86.86    6.89 
   6  -8  -4   72.73    6.71 
   6  -8  -4   67.42    6.43 
  -6   8   4   85.59    8.57 
  -6   8   4   87.03    9.63 
   5  -8  -4  212.95   11.72 
   5  -8  -4  218.91   11.95 
  -5   8   4  235.33   13.36 
  -5   8   4  218.95   11.47 
  -5   8   4  225.33   14.50 
   4  -8  -4  771.22   33.44 
   4  -8  -4  738.51   33.10 
  -4   8   4  698.53   34.01 
  -4   8   4  703.49   32.83 
  -4   8   4  758.65   35.55 
   3  -8  -4  862.34   38.40 
   3  -8  -4  837.23   38.60 
  -3   8   4  914.21   39.63 
  -3   8   4  845.25   38.16 
  -3   8   4  859.20   40.60 
   2  -8  -4 1108.80   48.97 
   2  -8  -4 1196.21   52.89 
   2  -8  -4 1095.81   48.61 
  -2   8   4 1093.18   49.58 
  -2   8   4 1052.39   50.60 
  -2   8   4 1095.96   48.38 
   1  -8  -4  994.80   44.00 
   1  -8  -4 1042.08   46.56 
   1  -8  -4  983.44   44.42 
  -1   8   4  953.84   43.75 
  -1   8   4 1023.99   45.13 
  -1   8   4 1017.80   46.11 
   0  -8  -4  542.76   24.89 
   0  -8  -4  515.02   26.41 
   0  -8  -4  554.73   24.27 
   0   8   4  573.26   24.09 
   0   8   4  534.62   26.30 
   0   8   4  539.29   25.44 
  -1  -8  -4  579.75   25.57 
  -1  -8  -4  512.52   22.74 
  -1  -8  -4  476.45   23.41 
   1   8   4  523.31   22.57 
   1   8   4  481.80   24.47 
   1   8   4  496.66   23.94 
  -2  -8  -4  941.56   41.93 
  -2  -8  -4  860.05   40.11 
  -2  -8  -4  893.91   39.38 
   2   8   4  943.43   39.25 
   2   8   4  896.61   41.28 
   2   8   4  875.43   40.54 
  -3  -8  -4  483.27   21.20 
  -3  -8  -4  507.77   24.03 
  -3  -8  -4  470.02   22.30 
   3   8   4  487.79   23.34 
   3   8   4  472.94   22.68 
  -4  -8  -4  869.60   41.63 
  -4  -8  -4  899.97   40.34 
   4   8   4  955.90   39.40 
   4   8   4  888.41   40.85 
  -5  -8  -4   63.84    6.49 
  -5  -8  -4   68.12    5.46 
   5   8   4   58.02    5.85 
   5   8   4   67.75    3.92 
  -6  -8  -4  312.08   15.84 
  -6  -8  -4  322.31   17.32 
   6   8   4  340.20   15.00 
   6   8   4  329.70   16.26 
  -7  -8  -4  132.52    7.38 
  -7  -8  -4  126.93    9.35 
   7   8   4  129.05    6.96 
   7   8   4  114.52    8.56 
  -8  -8  -4   51.33    6.78 
   8   8   4   50.83    6.57 
  -9  -8  -4  582.64   28.69 
   9   8   4  602.46   28.65 
 -10  -8  -4  203.39   13.16 
  10   8   4  218.69   13.36 
   6  -9  -4  469.86   22.03 
   6  -9  -4  432.36   22.01 
  -6   9   4  415.47   25.19 
  -6   9   4  533.74   24.29 
   5  -9  -4  379.22   18.40 
   5  -9  -4  374.26   18.67 
  -5   9   4  373.89   18.09 
  -5   9   4  384.29   20.05 
  -5   9   4  375.14   21.28 
   4  -9  -4  476.85   20.74 
   4  -9  -4  433.70   20.42 
  -4   9   4  419.30   20.11 
  -4   9   4  414.14   21.46 
  -4   9   4  417.74   23.11 
   3  -9  -4  439.00   20.72 
   3  -9  -4  415.23   20.12 
  -3   9   4  421.39   19.89 
  -3   9   4  447.49   21.66 
  -3   9   4  441.72   22.92 
   2  -9  -4  570.11   26.30 
   2  -9  -4  597.68   25.76 
  -2   9   4  554.56   25.44 
  -2   9   4  542.35   28.04 
  -2   9   4  573.31   27.08 
   1  -9  -4  705.15   33.11 
  -1   9   4  751.52   32.45 
  -1   9   4  770.64   34.07 
  -1   9   4  710.13   34.96 
   0  -9  -4 2024.61   88.01 
   0  -9  -4 1977.38   90.01 
   0  -9  -4 2007.60   87.33 
   0   9   4 1928.72   87.14 
   0   9   4 2167.07   89.82 
   0   9   4 1977.74   88.52 
  -1  -9  -4  322.93   14.52 
  -1  -9  -4  295.93   15.39 
   1   9   4  298.36   16.84 
   1   9   4  317.16   16.08 
   1   9   4  341.66   14.41 
  -2  -9  -4  301.62   15.09 
  -2  -9  -4  308.77   14.05 
  -2  -9  -4  323.95   17.24 
   2   9   4  320.52   14.01 
   2   9   4  297.98   15.71 
   2   9   4  298.94   17.39 
  -3  -9  -4  107.13    6.85 
  -3  -9  -4  103.01    8.81 
   3   9   4  100.46    7.62 
   3   9   4  116.96    5.58 
  -4  -9  -4  551.96   25.38 
  -4  -9  -4  476.18   26.73 
   4   9   4  574.86   26.17 
   4   9   4  595.89   24.32 
  -5  -9  -4  135.13    9.96 
  -5  -9  -4  115.87    7.75 
   5   9   4  121.00    6.21 
   5   9   4  116.98    7.84 
  -6  -9  -4  274.97   14.19 
  -6  -9  -4  280.54   15.86 
   6   9   4  300.76   15.28 
  -7  -9  -4  441.77   22.26 
  -7  -9  -4  417.61   20.26 
   7   9   4  423.52   21.31 
  -8  -9  -4  238.08   14.38 
   8   9   4  226.44   13.57 
  -9  -9  -4  147.41   11.07 
   9   9   4  135.88    9.62 
   5 -10  -4  333.17   16.53 
   5 -10  -4  341.80   17.05 
  -5  10   4  343.90   18.54 
  -5  10   4  328.63   19.80 
  -5  10   4  298.32   16.07 
   4 -10  -4  411.21   19.58 
   4 -10  -4  371.85   18.63 
  -4  10   4  420.33   20.92 
  -4  10   4  371.40   18.61 
  -4  10   4  401.94   22.12 
   3 -10  -4  512.95   23.44 
   3 -10  -4  546.25   24.17 
  -3  10   4  524.84   24.84 
  -3  10   4  471.74   26.19 
  -3  10   4  478.98   23.10 
   2 -10  -4   95.82    6.01 
   2 -10  -4   94.24    6.35 
  -2  10   4   81.43    5.85 
  -2  10   4   85.35    9.10 
  -2  10   4   87.54    7.98 
   1 -10  -4  190.08   10.60 
  -1  10   4  190.77   11.46 
  -1  10   4  185.00   12.62 
  -1  10   4  181.99    9.40 
   0 -10  -4   97.17    5.72 
   0 -10  -4   91.49    9.22 
   0 -10  -4   97.01    6.94 
   0  10   4   93.26    7.77 
   0  10   4   92.62    8.75 
   0  10   4   91.57    5.52 
  -1 -10  -4  144.12   11.11 
  -1 -10  -4  150.10    8.94 
  -1 -10  -4  155.31    7.68 
   1  10   4  147.81    9.72 
   1  10   4  146.75    7.48 
  -2 -10  -4  276.59   17.38 
  -2 -10  -4  298.61   15.31 
   2  10   4  318.04   16.15 
   2  10   4  333.49   14.16 
  -3 -10  -4  725.25   33.74 
  -3 -10  -4  651.66   31.38 
   3  10   4  722.83   30.59 
   3  10   4  650.20   32.09 
  -4 -10  -4  294.44   17.16 
  -4 -10  -4  316.16   15.14 
   4  10   4  294.85   15.55 
  -5 -10  -4  520.59   27.09 
  -5 -10  -4  562.20   25.27 
   5  10   4  535.27   25.82 
  -6 -10  -4  214.45   13.46 
  -6 -10  -4  188.21   11.09 
   6  10   4  215.96   12.60 
  -7 -10  -4  531.29   27.08 
   7  10   4  540.08   26.30 
  -8 -10  -4  472.81   25.00 
   8  10   4  483.39   23.74 
  -9 -10  -4  249.23   15.81 
   9  10   4  247.62   14.98 
   4 -11  -4   51.01    6.78 
   4 -11  -4   36.79    4.71 
  -4  11   4   39.80    5.01 
  -4  11   4   53.00    8.19 
  -4  11   4   48.54   10.34 
   3 -11  -4  181.08    9.76 
   3 -11  -4  178.43   10.13 
  -3  11   4  160.34    9.58 
  -3  11   4  163.87   13.27 
  -3  11   4  178.07   11.16 
   2 -11  -4  177.63    9.72 
   2 -11  -4  181.79   10.00 
  -2  11   4  173.17   12.89 
  -2  11   4  161.50    9.04 
  -2  11   4  168.78   11.55 
   1 -11  -4  215.24   12.03 
   1 -11  -4  225.78   10.88 
  -1  11   4  208.62   12.33 
  -1  11   4  205.37   10.73 
   0 -11  -4   28.04    4.18 
   0  11   4   23.93    3.54 
   0  11   4   28.00    5.28 
  -1 -11  -4  175.83   12.72 
  -1 -11  -4  153.99    9.89 
   1  11   4  158.13   10.80 
   1  11   4  175.31    9.70 
  -2 -11  -4  111.14   10.30 
  -2 -11  -4  113.47    7.75 
   2  11   4  105.12    7.78 
  -3 -11  -4  225.36   14.28 
  -3 -11  -4  197.31   11.44 
   3  11   4  205.99   12.56 
  -4 -11  -4  415.55   19.37 
  -4 -11  -4  376.26   21.61 
   4  11   4  393.50   20.21 
  -5 -11  -4  379.97   21.43 
  -5 -11  -4  375.34   18.60 
   5  11   4  378.25   19.73 
  -6 -11  -4  500.47   24.07 
  -6 -11  -4  517.21   26.76 
   6  11   4  499.67   25.28 
  -7 -11  -4  471.79   25.14 
   7  11   4  479.22   24.27 
  -8 -11  -4  151.43   12.63 
   8  11   4  135.75   10.03 
   3 -12  -4   30.94    4.59 
   3 -12  -4   34.04    5.03 
  -3  12   4   25.61    6.20 
  -3  12   4   39.04    6.25 
   2 -12  -4  179.00   10.53 
  -2  12   4  179.18   11.51 
   1 -12  -4  108.50    7.44 
  -1  12   4   94.90    9.26 
   0 -12  -4  219.68   12.28 
   0  12   4  237.75   13.95 
  -1 -12  -4  367.94   18.33 
   1  12   4  375.57   19.17 
  -2 -12  -4  227.93   15.55 
  -2 -12  -4  221.19   12.63 
   2  12   4  238.43   13.81 
  -3 -12  -4  300.07   18.75 
  -3 -12  -4  294.66   15.80 
   3  12   4  329.08   17.09 
  -4 -12  -4  266.57   14.69 
  -4 -12  -4  278.61   17.71 
   4  12   4  298.14   16.13 
  -5 -12  -4  220.52   12.80 
  -5 -12  -4  223.59   15.45 
   5  12   4  230.98   13.93 
  -6 -12  -4  295.47   18.01 
   6  12   4  269.38   15.71 
  -7 -12  -4  140.30   12.91 
   7  12   4  119.09   10.83 
   1 -13  -4  104.73    7.81 
  -1  13   4  103.66    9.90 
   0 -13  -4  344.17   18.14 
   0  13   4  352.83   19.23 
  -1 -13  -4  434.96   21.84 
   1  13   4  444.82   22.90 
  -2 -13  -4  432.86   21.46 
   2  13   4  429.01   22.43 
  -3 -13  -4  336.12   17.04 
   3  13   4  313.56   18.06 
  -4 -13  -4  279.31   15.43 
  -4 -13  -4  304.99   18.91 
   4  13   4  284.04   16.08 
  -5 -13  -4   44.63   10.68 
   5  13   4   31.64    6.40 
   3  12  -5  252.78   15.14 
   3  12  -5  302.58   16.72 
   2  12  -5  349.95   18.30 
   2  12  -5  382.61   20.10 
   1  12  -5  439.21   22.37 
   1  12  -5  470.34   23.64 
   0  12  -5  422.75   20.55 
   0  12  -5  426.23   21.69 
   0 -12   5  385.54   19.66 
  -1  12  -5  408.94   20.30 
  -1  12  -5  427.60   21.62 
   1 -12   5  383.65   19.62 
  -2  12  -5  346.52   19.05 
  -2  12  -5  365.83   20.91 
  -2  12  -5  315.60   16.76 
  -2  12  -5  341.32   17.48 
   2 -12   5  369.43   17.63 
  -3  12  -5  108.18   11.35 
  -3  12  -5  113.78    7.90 
  -3  12  -5  104.65    9.64 
   3 -12   5  116.96    8.44 
   3 -12   5  106.38    7.33 
   5  11  -5  187.99   13.00 
   5  11  -5  185.64   11.90 
   4  11  -5  567.10   27.25 
   4  11  -5  564.36   28.26 
   3  11  -5  669.96   30.96 
   3  11  -5  651.78   32.07 
   2  11  -5  309.90   16.19 
   2  11  -5  300.94   16.96 
   1  11  -5   76.26    7.85 
   1  11  -5   85.68    6.37 
  -1 -11   5   67.30    5.94 
   0  11  -5  270.24   13.90 
   0  11  -5  294.38   14.93 
   0  11  -5  294.35   16.20 
   0 -11   5  304.20   14.50 
  -1  11  -5  144.15    8.08 
  -1  11  -5  162.04   10.61 
  -1  11  -5  128.40   11.62 
  -1  11  -5  156.73    9.60 
   1 -11   5  144.47    8.73 
  -2  11  -5  125.59    7.52 
  -2  11  -5  115.62   10.94 
  -2  11  -5  132.98    8.96 
  -2  11  -5  126.26    9.68 
   2 -11   5  132.62    8.35 
  -3  11  -5  330.67   15.61 
  -3  11  -5  330.62   16.67 
  -3  11  -5  295.76   18.74 
  -3  11  -5  311.45   17.06 
   3 -11   5  325.22   15.95 
  -4  11  -5  547.81   29.76 
  -4  11  -5  579.04   28.70 
  -4  11  -5  612.39   27.71 
   4 -11   5  588.61   27.51 
  -5  11  -5  214.33   15.11 
  -5  11  -5  187.75   12.99 
  -5  11  -5  198.84   11.49 
   5 -11   5  211.51   12.16 
   5 -11   5  196.34   11.29 
   6  10  -5  414.67   22.08 
   6  10  -5  420.11   21.28 
  -6 -10   5  425.42   25.47 
   5  10  -5  523.95   24.58 
   5  10  -5  524.79   25.29 
  -5 -10   5  481.24   27.98 
   4  10  -5  245.38   13.61 
   4  10  -5  230.68   13.33 
  -4 -10   5  232.86   16.47 
   3  10  -5   48.67    5.20 
   3  10  -5   49.42    6.97 
  -3 -10   5   38.67    8.95 
   2  10  -5  303.69   15.85 
   2  10  -5  303.47   16.50 
   1  10  -5  197.10   12.34 
   1  10  -5  200.14   11.70 
   1  10  -5  207.94   10.27 
  -1 -10   5  213.40   10.65 
   0  10  -5  311.16   17.29 
   0  10  -5  324.13   15.52 
   0  10  -5  340.49   18.83 
   0  10  -5  345.67   16.74 
   0 -10   5  325.75   15.81 
  -1  10  -5  241.54   13.76 
  -1  10  -5  263.60   12.00 
  -1  10  -5  226.00   14.98 
  -1  10  -5  247.02   13.08 
   1 -10   5  230.49   12.29 
  -2  10  -5  238.44   13.56 
  -2  10  -5  264.69   12.94 
  -2  10  -5  236.84   14.87 
  -2  10  -5  215.07   11.67 
   2 -10   5  226.88   12.23 
  -3  10  -5  381.39   18.53 
  -3  10  -5  390.52   21.46 
  -3  10  -5  436.40   19.59 
  -3  10  -5  386.19   20.18 
   3 -10   5  378.44   18.77 
  -4  10  -5  359.26   19.43 
  -4  10  -5  373.18   21.04 
  -4  10  -5  362.08   17.89 
  -4  10  -5  384.58   18.71 
   4 -10   5  389.51   18.53 
  -5  10  -5 1113.11   49.46 
  -5  10  -5 1090.57   50.60 
  -5  10  -5 1082.25   51.45 
   5 -10   5 1117.11   49.01 
   5 -10   5 1089.40   49.30 
  -6  10  -5  323.98   17.23 
  -6  10  -5  314.17   18.04 
  -6  10  -5  336.03   19.13 
   6 -10   5  329.76   16.66 
   6 -10   5  347.24   17.30 
   7   9  -5   93.96    8.66 
   7   9  -5   82.93    9.24 
  -7  -9   5  102.86   12.18 
   6   9  -5  361.30   18.94 
   6   9  -5  366.83   18.82 
  -6  -9   5  364.75   22.07 
   5   9  -5  579.33   26.99 
   5   9  -5  581.21   27.59 
  -5  -9   5  537.14   29.81 
   4   9  -5  321.77   17.02 
   4   9  -5  319.08   16.53 
  -4  -9   5  320.46   19.36 
   3   9  -5  525.15   25.05 
   3   9  -5  531.58   24.51 
  -3  -9   5  484.85   26.87 
   2   9  -5  429.22   20.51 
   2   9  -5  387.13   19.72 
   2   9  -5  398.56   18.44 
  -2  -9   5  415.32   18.58 
  -2  -9   5  395.85   22.05 
   1   9  -5  183.32   10.75 
   1   9  -5  155.68    9.63 
   1   9  -5  187.86   12.16 
   1   9  -5  182.11    8.97 
  -1  -9   5  166.85    8.91 
   0   9  -5  471.87   23.15 
   0   9  -5  501.57   21.57 
   0   9  -5  480.65   24.45 
   0   9  -5  451.46   22.47 
   0  -9   5  460.25   21.72 
  -1   9  -5  618.19   28.85 
  -1   9  -5  664.69   29.76 
  -1   9  -5  626.86   30.23 
  -1   9  -5  677.13   31.69 
   1  -9   5  632.32   29.10 
  -2   9  -5  476.13   23.80 
  -2   9  -5  510.71   23.29 
  -2   9  -5  493.31   25.02 
  -2   9  -5  498.21   22.48 
   2  -9   5  478.67   22.75 
  -3   9  -5 1145.98   54.22 
  -3   9  -5 1170.79   52.46 
  -3   9  -5 1097.05   53.06 
  -3   9  -5 1274.05   52.04 
   3  -9   5 1197.34   52.28 
  -4   9  -5  529.55   27.76 
  -4   9  -5  567.83   25.38 
  -4   9  -5  540.25   26.55 
  -4   9  -5  559.99   25.78 
   4  -9   5  559.76   25.71 
  -5   9  -5  327.59   16.03 
  -5   9  -5  330.83   18.67 
  -5   9  -5  311.73   16.50 
  -5   9  -5  323.86   17.26 
   5  -9   5  335.69   16.18 
  -6   9  -5  257.69   13.12 
  -6   9  -5  239.27   14.15 
  -6   9  -5  253.11   15.44 
   6  -9   5  236.82   12.92 
   6  -9   5  241.46   13.37 
  -7   9  -5  606.78   28.82 
  -7   9  -5  522.90   27.44 
  -7   9  -5  614.82   29.77 
   7  -9   5  579.68   27.43 
   7  -9   5  601.63   27.85 
   7   8  -5  127.36    9.50 
   7   8  -5  126.54    9.99 
  -7  -8   5  114.45   12.74 
   6   8  -5  107.93    9.20 
   6   8  -5  132.70    8.28 
  -6  -8   5  119.59   11.54 
   5   8  -5  153.66   10.31 
   5   8  -5  162.39   10.07 
  -5  -8   5  158.85   12.72 
   4   8  -5  382.83   19.88 
   4   8  -5  416.05   18.35 
   4   8  -5  392.15   19.32 
  -4  -8   5  404.43   22.30 
   3   8  -5  274.71   14.23 
   3   8  -5  270.65   14.52 
   3   8  -5  296.16   13.05 
  -3  -8   5  251.41   16.42 
   2   8  -5 1003.04   43.91 
   2   8  -5  897.03   42.47 
   2   8  -5  935.48   42.14 
   2   8  -5  967.99   41.16 
  -2  -8   5  914.01   41.04 
  -2  -8   5  893.56   44.12 
   1   8  -5  777.71   35.46 
   1   8  -5  769.53   34.20 
   1   8  -5  743.70   34.96 
   1   8  -5  812.93   36.82 
  -1  -8   5  775.81   37.03 
  -1  -8   5  756.63   34.18 
   0   8  -5 1271.38   59.83 
   0   8  -5 1302.67   58.88 
   0   8  -5 1366.63   57.69 
   0   8  -5 1351.90   58.43 
   0  -8   5 1270.98   57.70 
   0  -8   5 1353.64   60.20 
  -1   8  -5 1188.49   50.79 
  -1   8  -5 1125.29   49.99 
  -1   8  -5 1134.67   51.17 
  -1   8  -5 1151.56   52.24 
   1  -8   5 1102.43   50.13 
  -2   8  -5  765.65   36.57 
  -2   8  -5  789.82   34.46 
  -2   8  -5  748.84   35.49 
  -2   8  -5  790.95   35.08 
   2  -8   5  774.10   34.64 
  -3   8  -5  821.37   39.17 
  -3   8  -5  866.03   40.30 
  -3   8  -5  847.70   38.67 
  -3   8  -5  891.52   38.29 
   3  -8   5  871.34   38.49 
  -4   8  -5  537.72   23.75 
  -4   8  -5  517.14   24.72 
  -4   8  -5  530.78   25.88 
  -4   8  -5  488.32   23.97 
   4  -8   5  505.35   23.95 
  -5   8  -5  598.29   27.28 
  -5   8  -5  562.13   26.44 
  -5   8  -5  560.61   28.17 
  -5   8  -5  556.41   26.16 
   5  -8   5  578.72   26.34 
  -6   8  -5  125.06    9.61 
  -6   8  -5  130.31    8.98 
  -6   8  -5  128.00    8.43 
  -6   8  -5  130.69    8.08 
   6  -8   5  118.87    7.65 
  -7   8  -5   17.59    4.92 
  -7   8  -5   20.17    4.64 
  -7   8  -5   19.39    3.58 
   7  -8   5   20.96    3.39 
   7  -8   5   18.40    3.50 
  -8   8  -5  110.34    9.12 
  -8   8  -5  105.90    7.70 
  -8   8  -5  115.92    9.92 
   8  -8   5  107.54    8.54 
   8  -8   5  111.96    8.16 
   8   7  -5   42.92    5.68 
   8   7  -5   40.98    6.08 
  -8  -7   5   41.47    8.19 
   7   7  -5  195.82   11.85 
   7   7  -5  199.35   11.42 
  -7  -7   5  205.08   15.33 
   6   7  -5  186.67   11.15 
   6   7  -5  176.15   11.46 
  -6  -7   5  191.53   13.66 
   5   7  -5  471.28   22.24 
   5   7  -5  468.80   23.68 
   5   7  -5  509.80   23.28 
  -5  -7   5  517.02   25.98 
   4   7  -5  241.41   13.17 
   4   7  -5  259.36   12.10 
   4   7  -5  239.39   13.39 
  -4  -7   5  260.31   15.54 
   3   7  -5  650.73   29.11 
   3   7  -5  646.56   30.21 
   3   7  -5  632.66   29.99 
   3   7  -5  673.35   32.98 
  -3  -7   5  665.69   32.17 
   2   7  -5  629.14   29.38 
   2   7  -5  586.13   26.84 
   2   7  -5  598.57   27.94 
   2   7  -5  593.13   27.73 
  -2  -7   5  601.52   26.63 
  -2  -7   5  607.52   29.74 
   1   7  -5 1108.15   50.65 
   1   7  -5 1198.56   49.67 
   1   7  -5 1130.24   50.41 
   1   7  -5 1209.46   51.94 
  -1  -7   5  998.90   51.73 
  -1  -7   5 1156.75   49.56 
   0   7  -5  827.86   36.31 
   0   7  -5  756.83   35.13 
   0   7  -5  867.52   36.08 
   0   7  -5  723.75   37.06 
   0  -7   5  819.36   37.47 
  -1   7  -5  865.04   39.30 
  -1   7  -5  898.48   38.41 
  -1   7  -5  831.82   40.25 
  -1   7  -5  947.12   39.15 
   1  -7   5  857.67   38.43 
   1  -7   5  827.77   40.19 
  -2   7  -5  930.32   41.31 
  -2   7  -5  988.48   40.84 
  -2   7  -5  862.36   41.49 
  -2   7  -5  907.82   42.55 
   2  -7   5  929.79   40.89 
  -3   7  -5   73.32    6.63 
  -3   7  -5   64.76    4.81 
  -3   7  -5   59.03    5.30 
  -3   7  -5   64.31    4.79 
   3  -7   5   60.88    4.95 
  -4   7  -5  614.09   26.88 
  -4   7  -5  568.94   27.19 
  -4   7  -5  602.11   28.48 
  -4   7  -5  594.18   27.56 
   4  -7   5  580.56   26.87 
  -5   7  -5  122.75    8.03 
  -5   7  -5  119.85    6.98 
  -5   7  -5  113.75    7.69 
  -5   7  -5  129.52    9.32 
   5  -7   5  126.35    7.20 
  -6   7  -5  176.76    9.82 
  -6   7  -5  200.14   10.65 
  -6   7  -5  172.57   11.38 
  -6   7  -5  155.17    9.93 
   6  -7   5  182.26    9.65 
  -7   7  -5  391.16   20.02 
  -7   7  -5  405.17   19.73 
  -7   7  -5  371.82   19.10 
   7  -7   5  398.84   19.10 
   7  -7   5  381.48   18.81 
  -8   7  -5  125.95    8.85 
  -8   7  -5  129.03    9.75 
  -8   7  -5  123.85    9.33 
   8  -7   5  131.22    8.12 
   8  -7   5  121.05    8.52 
  -9   7  -5   68.16    7.49 
  -9   7  -5   84.25    8.34 
  -9   7  -5   75.00    8.07 
   9  -7   5   84.41    7.37 
   9  -7   5   90.64    7.63 
   8   6  -5  308.75   17.34 
   8   6  -5  335.17   16.88 
  -8  -6   5  297.98   19.65 
   7   6  -5  295.82   16.35 
   7   6  -5  296.96   15.96 
  -7  -6   5  314.27   18.59 
   6   6  -5  435.47   19.69 
   6   6  -5  386.27   20.27 
   6   6  -5  428.91   21.09 
  -6  -6   5  443.06   23.23 
   5   6  -5  541.89   25.29 
   5   6  -5  517.91   25.47 
   5   6  -5  538.42   24.37 
  -5  -6   5  553.80   27.58 
   4   6  -5  910.80   41.20 
   4   6  -5  926.31   42.21 
   4   6  -5  934.67   41.94 
  -4  -6   5  972.41   44.16 
   3   6  -5  177.86    9.98 
   3   6  -5  184.59    9.01 
   3   6  -5  201.49   11.53 
   3   6  -5  185.97   10.03 
  -3  -6   5  179.15    8.31 
  -3  -6   5  160.47   11.51 
   2   6  -5  515.17   23.16 
   2   6  -5  513.55   23.93 
   2   6  -5  538.99   25.31 
   2   6  -5  521.73   23.80 
  -2  -6   5  497.40   22.79 
   1   6  -5 1253.76   53.80 
   1   6  -5 1191.50   52.54 
   1   6  -5 1111.95   52.32 
   1   6  -5 1208.99   51.79 
  -1  -6   5 1157.11   51.56 
  -1  -6   5 1184.40   53.95 
   0   6  -5  137.88    7.78 
   0   6  -5  142.11    7.31 
   0   6  -5  137.35    8.81 
   0  -6   5  155.75    9.52 
  -1   6  -5  259.13   13.01 
  -1   6  -5  224.10   11.64 
  -1   6  -5  219.73   12.73 
  -1   6  -5  227.36   10.89 
   1  -6   5  231.96   12.69 
   1  -6   5  221.48   10.97 
  -2   6  -5  583.42   25.16 
  -2   6  -5  534.29   26.22 
  -2   6  -5  569.69   24.67 
  -2   6  -5  502.93   25.13 
  -2   6  -5  588.17   26.44 
   2  -6   5  552.33   24.77 
   2  -6   5  525.00   26.03 
  -3   6  -5  677.02   31.08 
  -3   6  -5  697.48   30.81 
  -3   6  -5  721.07   32.34 
   3  -6   5  674.27   32.77 
   3  -6   5  682.58   30.89 
  -4   6  -5   38.31    4.94 
  -4   6  -5   33.52    3.15 
  -4   6  -5   26.65    3.35 
   4  -6   5   26.76    3.87 
  -5   6  -5   64.94    5.35 
  -5   6  -5   67.15    6.19 
  -5   6  -5   63.54    4.82 
  -5   6  -5   73.33    4.71 
   5  -6   5   67.44    5.33 
  -6   6  -5  240.68   13.29 
  -6   6  -5  220.34   12.66 
  -6   6  -5  251.48   12.10 
  -6   6  -5  236.08   12.07 
   6  -6   5  238.39   11.97 
  -7   6  -5  311.12   16.07 
  -7   6  -5  319.56   16.57 
  -7   6  -5  305.67   15.71 
  -7   6  -5  299.14   15.42 
   7  -6   5  333.34   15.77 
  -8   6  -5  699.63   31.88 
  -8   6  -5  672.31   32.56 
  -8   6  -5  686.51   32.59 
   8  -6   5  709.14   31.83 
   8  -6   5  707.11   31.98 
  -9   6  -5  638.57   29.44 
  -9   6  -5  578.40   29.08 
  -9   6  -5  595.54   28.57 
   9  -6   5  620.14   28.45 
   9  -6   5  617.56   28.56 
   9   5  -5  379.71   20.41 
   9   5  -5  372.15   19.68 
  -9  -5   5  384.58   22.43 
   8   5  -5  415.18   19.65 
   8   5  -5  361.03   19.92 
  -8  -5   5  375.88   21.95 
   7   5  -5  410.39   20.39 
   7   5  -5  404.61   19.44 
   7   5  -5  419.02   20.88 
  -7  -5   5  421.16   22.89 
   6   5  -5  943.53   42.08 
   6   5  -5  917.72   42.99 
   6   5  -5  953.92   42.83 
  -6  -5   5  980.31   45.21 
   5   5  -5  301.59   13.85 
   5   5  -5  288.11   14.88 
   5   5  -5  287.66   14.69 
  -5  -5   5  281.71   16.76 
   4   5  -5  636.59   29.33 
   4   5  -5  646.31   28.59 
   4   5  -5  655.55   29.28 
  -4  -5   5  620.49   31.05 
   3   5  -5  703.53   32.88 
   3   5  -5  709.74   31.09 
   3   5  -5  689.77   31.57 
   3   5  -5  679.50   31.51 
  -3  -5   5  702.58   30.34 
  -3  -5   5  707.53   33.39 
   2   5  -5  709.43   35.21 
   2   5  -5  731.46   34.10 
   2   5  -5  769.81   34.13 
   2   5  -5  751.68   33.59 
  -2  -5   5  850.58   35.96 
  -2  -5   5  753.68   33.15 
   1   5  -5  476.62   23.03 
   1   5  -5  458.68   21.72 
   1   5  -5  517.85   21.38 
  -1  -5   5  463.17   23.10 
  -1  -5   5  456.31   20.99 
   0   5  -5  208.10   10.62 
   0   5  -5  230.20   11.86 
   0   5  -5  208.82   10.00 
   0   5  -5  198.30   10.56 
   0  -5   5  197.37   11.65 
  -1   5  -5  193.49   10.36 
  -1   5  -5  185.52    9.30 
  -1   5  -5  165.08    9.13 
  -1   5  -5  171.24   10.10 
  -1   5  -5  184.54    8.70 
   1  -5   5  161.73    9.97 
   1  -5   5  177.85    8.58 
  -2   5  -5   38.41    3.23 
  -2   5  -5   34.48    4.17 
  -2   5  -5   32.57    3.70 
  -2   5  -5   31.47    3.50 
  -2   5  -5   36.75    4.60 
   2  -5   5   31.60    4.28 
   2  -5   5   31.63    3.13 
  -3   5  -5  176.42   10.31 
  -3   5  -5  181.80    9.46 
  -3   5  -5  198.34    9.63 
  -3   5  -5  195.22    9.25 
  -3   5  -5  178.86   10.23 
   3  -5   5  192.69    9.30 
   3  -5   5  177.71   10.02 
  -4   5  -5  807.18   34.90 
  -4   5  -5  801.29   34.82 
  -4   5  -5  738.62   34.56 
  -4   5  -5  801.84   35.66 
  -4   5  -5  760.58   35.63 
   4  -5   5  766.30   34.66 
  -5   5  -5 1163.41   50.04 
  -5   5  -5 1091.07   50.13 
  -5   5  -5 1138.01   50.96 
   5  -5   5 1155.29   50.13 
  -6   5  -5  673.31   30.76 
  -6   5  -5  659.37   31.38 
  -6   5  -5  688.33   30.56 
  -6   5  -5  689.81   31.05 
   6  -5   5  689.19   30.78 
  -7   5  -5  719.75   34.12 
  -7   5  -5  756.78   34.08 
  -7   5  -5  742.74   33.38 
  -7   5  -5  760.53   33.68 
   7  -5   5  735.31   33.61 
  -8   5  -5  281.05   14.73 
  -8   5  -5  282.20   14.77 
  -8   5  -5  271.01   13.98 
   8  -5   5  283.10   14.17 
   8  -5   5  282.78   14.29 
  -9   5  -5  268.27   14.61 
  -9   5  -5  269.01   14.84 
  -9   5  -5  280.56   14.34 
   9  -5   5  276.37   14.19 
   9  -5   5  271.83   14.23 
 -10   5  -5  344.47   17.91 
 -10   5  -5  309.24   17.29 
 -10   5  -5  337.62   16.82 
  10  -5   5  337.96   17.00 
  10  -5   5  346.28   16.65 
   9   4  -5   51.45    7.79 
   9   4  -5   48.99    7.06 
  -9  -4   5   45.18   10.01 
   8   4  -5  484.43   24.30 
   8   4  -5  520.77   25.33 
   8   4  -5  507.16   25.51 
  -8  -4   5  599.31   28.33 
   7   4  -5  232.65   13.37 
   7   4  -5  254.93   12.63 
   7   4  -5  257.05   13.16 
  -7  -4   5  262.51   15.91 
   6   4  -5  217.25   11.41 
   6   4  -5  210.70   12.03 
   6   4  -5  220.13   11.15 
  -6  -4   5  219.33   13.90 
   5   4  -5  548.31   26.39 
   5   4  -5  536.54   26.06 
   5   4  -5  589.92   25.76 
  -5  -4   5  600.09   28.44 
   4   4  -5  372.87   16.91 
   4   4  -5  343.42   18.44 
   4   4  -5  361.07   17.33 
   4   4  -5  354.00   17.41 
  -4  -4   5  396.67   19.53 
   3   4  -5  551.68   25.89 
   3   4  -5  563.26   25.85 
   3   4  -5  588.24   27.24 
   3   4  -5  585.47   25.54 
  -3  -4   5  573.67   24.81 
  -3  -4   5  559.09   24.72 
  -3  -4   5  566.60   27.59 
   2   4  -5  170.99    9.46 
   2   4  -5  177.32   10.60 
   2   4  -5  176.01    9.23 
   2   4  -5  186.66    9.04 
  -2  -4   5  179.41    8.36 
  -2  -4   5  211.45   11.27 
  -2  -4   5  186.12    8.46 
   1   4  -5  552.36   24.15 
   1   4  -5  495.24   24.23 
   1   4  -5  537.78   23.92 
   1   4  -5  517.11   25.33 
  -1  -4   5  584.22   25.74 
  -1  -4   5  526.63   23.54 
   0   4  -5  691.75   32.92 
   0   4  -5  760.62   34.05 
   0   4  -5  687.29   32.80 
   0   4  -5  745.62   32.62 
   0   4  -5  806.59   34.16 
   0  -4   5  744.82   34.00 
  -1   4  -5 1359.35   56.02 
  -1   4  -5 1281.69   54.64 
  -1   4  -5 1181.75   54.76 
  -1   4  -5 1212.22   54.94 
   1  -4   5 1250.94   55.79 
   1  -4   5 1231.53   54.50 
  -2   4  -5 1626.42   72.53 
  -2   4  -5 1729.22   72.77 
  -2   4  -5 1638.02   73.53 
  -2   4  -5 1645.91   73.51 
  -2   4  -5 1786.86   72.51 
   2  -4   5 1685.08   72.43 
   2  -4   5 1571.29   73.26 
  -3   4  -5 1495.49   64.68 
  -3   4  -5 1526.27   65.55 
  -3   4  -5 1568.00   65.64 
  -3   4  -5 1422.12   64.57 
  -3   4  -5 1488.71   64.80 
   3  -4   5 1368.96   65.11 
   3  -4   5 1517.45   64.66 
  -4   4  -5   63.97    4.51 
  -4   4  -5   56.81    4.90 
  -4   4  -5   67.53    5.28 
  -4   4  -5   71.24    4.39 
  -4   4  -5   55.46    3.90 
   4  -4   5   54.99    3.92 
  -5   4  -5 1182.33   49.79 
  -5   4  -5 1141.04   49.52 
  -5   4  -5 1105.13   50.15 
  -5   4  -5 1102.01   49.58 
  -5   4  -5 1142.42   50.22 
   5  -4   5 1093.41   49.55 
  -6   4  -5 1748.91   78.00 
  -6   4  -5 1741.63   78.50 
  -6   4  -5 1764.05   78.47 
  -6   4  -5 1837.15   78.13 
   6  -4   5 1855.90   78.12 
  -7   4  -5  214.99   10.92 
  -7   4  -5  219.89   11.19 
  -7   4  -5  194.95   10.74 
  -7   4  -5  214.10   11.21 
   7  -4   5  199.41   10.86 
  -8   4  -5  616.94   28.09 
  -8   4  -5  600.94   28.21 
  -8   4  -5  618.11   28.50 
   8  -4   5  617.44   27.98 
   8  -4   5  605.19   28.04 
  -9   4  -5  378.48   19.13 
  -9   4  -5  415.35   19.79 
  -9   4  -5  389.11   19.17 
   9  -4   5  401.09   19.14 
   9  -4   5  399.60   18.86 
 -10   4  -5   38.06    4.90 
 -10   4  -5   34.67    5.26 
 -10   4  -5   29.60    5.17 
  10  -4   5   36.70    4.80 
  10  -4   5   36.80    4.41 
   9   3  -5  194.67   12.25 
   9   3  -5  206.61   12.42 
   9   3  -5  213.53   11.31 
  -9  -3   5  203.64   15.27 
   8   3  -5  133.16    7.79 
   8   3  -5  130.70    8.89 
   8   3  -5  118.53    9.30 
  -8  -3   5  106.00   11.30 
   7   3  -5  156.16    9.74 
   7   3  -5  161.59    9.01 
   7   3  -5  160.22    9.69 
  -7  -3   5  175.57   12.64 
   6   3  -5  348.68   16.62 
   6   3  -5  342.96   15.94 
   6   3  -5  352.71   16.55 
  -6  -3   5  297.59   18.18 
   5   3  -5  146.67    8.24 
   5   3  -5  150.90    8.92 
   5   3  -5  144.55    8.42 
  -5  -3   5  185.14   11.05 
   4   3  -5  227.93   11.81 
   4   3  -5  236.54   11.43 
   4   3  -5  226.36   12.85 
   4   3  -5  214.76   11.75 
  -4  -3   5  274.23   13.92 
  -4  -3   5  232.47   13.50 
   3   3  -5 1048.43   45.92 
   3   3  -5 1062.43   47.17 
   3   3  -5 1038.18   45.96 
   3   3  -5 1077.03   45.70 
  -3  -3   5 1030.27   45.01 
  -3  -3   5  961.60   47.32 
  -3  -3   5 1064.74   47.34 
   2   3  -5  791.22   35.53 
   2   3  -5  818.91   35.36 
   2   3  -5  718.75   36.52 
   2   3  -5  847.50   34.83 
  -2  -3   5  796.75   34.86 
  -2  -3   5  830.43   37.09 
   1   3  -5 1449.54   63.83 
   1   3  -5 1441.24   64.06 
   1   3  -5 1482.57   63.50 
   1   3  -5 1524.82   63.88 
  -1  -3   5 1530.83   63.79 
  -1  -3   5 1374.39   65.13 
   0   3  -5  697.69   33.63 
   0   3  -5  755.07   32.47 
   0   3  -5  788.37   32.33 
   0   3  -5  745.65   32.48 
   0   3  -5  685.74   33.56 
   0   3  -5  714.07   32.67 
   0  -3   5  748.45   32.24 
   0  -3   5  761.51   33.76 
  -1   3  -5  997.32   42.06 
  -1   3  -5  941.03   41.15 
  -1   3  -5  977.69   42.10 
  -1   3  -5  858.78   40.82 
  -1   3  -5  931.71   40.84 
  -1   3  -5  952.55   40.94 
   1  -3   5  928.79   40.63 
   1  -3   5  892.87   41.78 
  -2   3  -5 1182.23   57.65 
  -2   3  -5 1307.78   57.87 
  -2   3  -5 1307.75   57.12 
  -2   3  -5 1340.68   56.94 
  -2   3  -5 1385.97   56.97 
  -2   3  -5 1285.06   56.77 
   2  -3   5 1347.06   56.71 
  -3   3  -5 1714.19   75.21 
  -3   3  -5 1877.57   75.43 
  -3   3  -5 1600.04   75.93 
  -3   3  -5 1678.51   75.43 
  -3   3  -5 1780.00   76.15 
  -3   3  -5 1737.44   75.39 
   3  -3   5 1774.18   75.22 
   3  -3   5 1705.09   75.37 
   3  -3   5 1760.52   75.77 
  -4   3  -5 3874.10  166.14 
  -4   3  -5 3808.75  165.53 
  -4   3  -5 3775.81  165.59 
  -4   3  -5 3797.16  166.03 
  -4   3  -5 3942.86  165.51 
   4  -3   5 3818.89  165.61 
  -5   3  -5  298.32   13.76 
  -5   3  -5  280.92   14.06 
  -5   3  -5  305.32   13.82 
  -5   3  -5  276.95   13.69 
  -5   3  -5  307.94   14.09 
   5  -3   5  277.85   13.64 
  -6   3  -5  954.07   43.13 
  -6   3  -5  977.09   43.01 
  -6   3  -5  997.14   43.26 
  -6   3  -5  994.01   43.27 
  -6   3  -5  972.89   43.03 
   6  -3   5  944.29   43.04 
  -7   3  -5  323.68   15.44 
  -7   3  -5  336.80   15.70 
  -7   3  -5  318.73   15.45 
  -7   3  -5  322.93   15.41 
  -7   3  -5  327.11   15.46 
   7  -3   5  309.83   15.25 
  -8   3  -5  171.40    9.46 
  -8   3  -5  184.59    9.35 
  -8   3  -5  178.64    9.62 
  -8   3  -5  164.91    9.92 
  -8   3  -5  196.98   10.08 
   8  -3   5  179.18    9.66 
  -9   3  -5  127.18    8.13 
  -9   3  -5  118.88    7.67 
  -9   3  -5  114.51    7.25 
   9  -3   5  121.84    7.65 
   9  -3   5  109.07    7.55 
 -10   3  -5  303.83   15.14 
 -10   3  -5  307.73   15.38 
 -10   3  -5  306.32   16.28 
  10  -3   5  320.11   15.57 
  10  -3   5  303.25   15.49 
   9   2  -5  226.19   13.88 
   9   2  -5  225.20   12.24 
   9   2  -5  213.13   13.00 
  -9  -2   5  241.55   16.11 
   8   2  -5  152.86    9.78 
   8   2  -5  153.28   10.39 
   8   2  -5  157.05    9.03 
  -8  -2   5  153.24   11.96 
   7   2  -5  189.94   10.50 
   7   2  -5  179.37   10.40 
   7   2  -5  187.79    9.89 
  -7  -2   5  172.41   12.36 
   6   2  -5  477.06   22.88 
   6   2  -5  492.70   22.17 
   6   2  -5  472.91   22.34 
   5   2  -5  266.94   13.79 
   5   2  -5  281.88   13.45 
   5   2  -5  279.37   13.14 
   4   2  -5  971.22   43.06 
   4   2  -5  921.76   42.84 
   4   2  -5  952.89   41.90 
   4   2  -5 1074.91   44.40 
   4   2  -5  957.84   42.72 
  -4  -2   5  976.58   44.56 
  -4  -2   5  937.14   41.92 
   3   2  -5  661.46   29.72 
   3   2  -5  634.57   28.18 
   3   2  -5  592.45   27.53 
   3   2  -5  628.50   28.33 
   3   2  -5  630.90   28.35 
  -3  -2   5  627.39   27.60 
  -3  -2   5  642.19   29.83 
  -3  -2   5  651.61   30.00 
   2   2  -5 1262.40   52.65 
   2   2  -5 1139.93   50.66 
   2   2  -5 1225.89   51.20 
   2   2  -5 1167.40   51.28 
  -2  -2   5 1063.31   52.44 
  -2  -2   5 1164.81   50.72 
   1   2  -5 1821.69   78.75 
   1   2  -5 1788.59   78.31 
   1   2  -5 1846.38   78.67 
   1   2  -5 1852.44   78.51 
   1   2  -5 1804.15   79.87 
   1   2  -5 1834.35   78.43 
  -1  -2   5 1845.56   79.96 
  -1  -2   5 1710.87   78.32 
   0   2  -5 2801.03  125.63 
   0   2  -5 3224.75  126.95 
   0   2  -5 3025.04  126.82 
   0   2  -5 2769.71  125.26 
   0   2  -5 2843.07  125.44 
   0   2  -5 2658.89  125.68 
   0   2  -5 2828.80  125.38 
   0  -2   5 3128.87  126.87 
  -1   2  -5 2304.34  107.34 
  -1   2  -5 2491.46  108.58 
  -1   2  -5 2674.11  108.81 
  -1   2  -5 2554.21  107.63 
  -1   2  -5 2518.58  107.70 
  -1   2  -5 2532.50  107.81 
   1  -2   5 2529.84  107.38 
   1  -2   5 2333.04  108.40 
  -2   2  -5 1134.93   47.03 
  -2   2  -5 1024.77   47.61 
  -2   2  -5 1142.85   47.04 
  -2   2  -5 1049.87   46.56 
  -2   2  -5 1040.72   47.01 
  -2   2  -5 1142.04   47.91 
   2  -2   5 1000.30   47.41 
   2  -2   5 1081.96   46.55 
  -3   2  -5 1340.04   59.12 
  -3   2  -5 1346.44   59.42 
  -3   2  -5 1369.56   60.10 
  -3   2  -5 1418.57   60.00 
  -3   2  -5 1392.42   59.52 
  -3   2  -5 1344.47   59.44 
   3  -2   5 1390.08   59.15 
   3  -2   5 1329.82   59.55 
  -4   2  -5  345.14   15.53 
  -4   2  -5  363.63   15.47 
  -4   2  -5  313.18   16.00 
  -4   2  -5  353.15   15.67 
  -4   2  -5  352.78   15.95 
  -4   2  -5  316.49   15.60 
   4  -2   5  348.27   15.68 
  -5   2  -5  372.83   16.83 
  -5   2  -5  333.29   16.84 
  -5   2  -5  367.94   16.75 
  -5   2  -5  362.24   16.67 
  -5   2  -5  370.86   16.68 
   5  -2   5  387.62   16.90 
  -6   2  -5  551.00   24.01 
  -6   2  -5  523.86   23.94 
  -6   2  -5  545.51   24.12 
  -6   2  -5  537.86   23.96 
  -6   2  -5  507.52   23.96 
   6  -2   5  533.42   24.10 
  -7   2  -5  115.35    6.03 
  -7   2  -5  109.30    5.90 
  -7   2  -5  106.47    5.90 
  -7   2  -5   88.66    5.97 
  -7   2  -5   97.18    5.93 
   7  -2   5  111.43    6.41 
  -8   2  -5  363.06   17.39 
  -8   2  -5  363.66   16.89 
  -8   2  -5  362.10   16.45 
  -8   2  -5  355.18   16.85 
  -8   2  -5  339.54   16.45 
   8  -2   5  351.89   16.87 
  -9   2  -5  417.47   19.06 
  -9   2  -5  394.72   18.95 
  -9   2  -5  438.36   20.24 
  -9   2  -5  419.29   19.63 
   9  -2   5  429.79   19.60 
   9  -2   5  390.11   19.46 
 -10   2  -5  306.75   15.99 
 -10   2  -5  306.38   14.52 
 -10   2  -5  308.42   15.31 
  10  -2   5  300.41   15.15 
  10  -2   5  295.96   14.85 
 -11   2  -5  366.35   18.54 
 -11   2  -5  345.17   16.63 
  11  -2   5  341.70   17.71 
  11  -2   5  346.51   17.32 
  11  -2   5  358.25   17.45 
   9   1  -5  239.99   13.21 
   9   1  -5  247.08   13.11 
   9   1  -5  251.88   14.65 
   8   1  -5  312.96   16.10 
   8   1  -5  315.48   15.62 
   7   1  -5  608.36   28.22 
   7   1  -5  600.96   27.89 
  -7  -1   5  619.28   28.65 
  -7  -1   5  616.23   30.50 
   6   1  -5  900.12   39.64 
   6   1  -5  885.76   39.31 
  -6  -1   5  914.39   40.05 
  -6  -1   5  839.65   41.50 
   5   1  -5  772.51   36.40 
   5   1  -5  816.44   36.29 
   5   1  -5  870.58   35.54 
  -5  -1   5  799.02   38.30 
  -5  -1   5  814.10   36.81 
   4   1  -5 1191.10   49.91 
   4   1  -5 1120.88   50.61 
   4   1  -5 1189.99   52.06 
   4   1  -5 1188.89   50.55 
  -4  -1   5 1022.45   52.07 
  -4  -1   5 1205.00   50.87 
  -4  -1   5 1163.15   52.36 
  -4  -1   5 1130.52   49.91 
   3   1  -5 2754.74  122.55 
   3   1  -5 2896.80  120.74 
   3   1  -5 2800.21  121.21 
   3   1  -5 2752.92  121.25 
  -3  -1   5 2875.69  120.77 
  -3  -1   5 2727.89  121.32 
   2   1  -5 1145.22   51.52 
   2   1  -5 1147.63   52.81 
   2   1  -5 1320.42   51.19 
   2   1  -5 1206.55   51.57 
  -2  -1   5 1078.27   52.78 
  -2  -1   5 1189.93   51.18 
  -2  -1   5 1121.40   52.80 
  -2  -1   5 1216.46   51.49 
   1   1  -5 1201.97   49.58 
   1   1  -5 1076.49   48.19 
   1   1  -5 1131.57   47.91 
   1   1  -5 1031.33   47.88 
   1   1  -5 1062.64   48.15 
  -1  -1   5 1114.47   48.10 
   0   1  -5  732.74   32.45 
   0   1  -5  699.91   32.01 
   0   1  -5  725.13   32.41 
   0   1  -5  692.69   32.24 
   0   1  -5  794.00   33.67 
   0   1  -5  719.03   31.99 
   0   1  -5  746.37   33.53 
   0  -1   5  793.19   33.58 
  -1   1  -5 2594.32  111.71 
  -1   1  -5 2736.87  112.75 
  -1   1  -5 2475.82  111.70 
  -1   1  -5 2432.63  112.49 
  -1   1  -5 2700.63  111.69 
  -1   1  -5 2742.23  111.36 
  -1   1  -5 2394.35  111.43 
   1  -1   5 2612.12  112.49 
  -2   1  -5  717.46   32.17 
  -2   1  -5  743.78   31.57 
  -2   1  -5  709.01   32.27 
  -2   1  -5  712.30   32.24 
  -2   1  -5  776.38   33.10 
   2  -1   5  702.50   32.62 
   2  -1   5  770.06   31.60 
  -3   1  -5  460.25   21.94 
  -3   1  -5  451.88   21.80 
  -3   1  -5  503.21   21.76 
  -3   1  -5  494.46   22.27 
  -3   1  -5  473.94   21.39 
  -3   1  -5  502.03   22.47 
   3  -1   5  531.46   21.45 
   3  -1   5  503.50   21.87 
  -4   1  -5  818.86   35.14 
  -4   1  -5  740.78   35.36 
  -4   1  -5  836.84   35.02 
  -4   1  -5  812.60   35.42 
  -4   1  -5  852.06   35.28 
  -4   1  -5  760.39   35.54 
   4  -1   5  799.93   35.00 
  -5   1  -5  822.00   34.82 
  -5   1  -5  760.44   34.56 
  -5   1  -5  800.24   34.53 
  -5   1  -5  779.66   34.73 
  -5   1  -5  786.01   34.54 
  -5   1  -5  766.84   34.54 
  -6   1  -5  303.89   13.87 
  -6   1  -5  319.98   13.92 
  -6   1  -5  301.55   13.99 
  -6   1  -5  288.25   13.58 
  -6   1  -5  314.31   14.04 
  -6   1  -5  274.05   13.68 
  -7   1  -5  921.25   39.51 
  -7   1  -5  856.48   39.51 
  -7   1  -5  935.20   39.99 
  -7   1  -5  914.13   39.88 
   7  -1   5  897.46   40.03 
  -8   1  -5  207.01   10.98 
  -8   1  -5  206.81   10.61 
  -8   1  -5  207.15    9.80 
  -8   1  -5  216.31   10.43 
  -8   1  -5  204.80    9.86 
   8  -1   5  220.41   10.73 
  -9   1  -5  493.49   23.42 
  -9   1  -5  482.71   21.94 
  -9   1  -5  505.76   22.03 
  -9   1  -5  482.61   22.83 
   9  -1   5  499.54   22.81 
   9  -1   5  499.87   22.83 
 -10   1  -5  367.42   17.70 
 -10   1  -5  332.61   15.67 
 -10   1  -5  348.98   15.80 
  10  -1   5  335.74   16.72 
  10  -1   5  353.84   16.79 
 -11   1  -5  408.82   18.07 
 -11   1  -5  409.53   20.18 
  11  -1   5  379.62   19.36 
  11  -1   5  380.10   19.01 
  11  -1   5  391.45   19.05 
   9   0  -5  114.75    7.96 
   9   0  -5  112.71    8.58 
  -9   0   5   97.95    9.44 
  -9   0   5  106.23   11.45 
   8   0  -5  423.10   20.31 
   8   0  -5  417.79   20.63 
  -8   0   5  420.94   23.07 
  -8   0   5  439.70   21.56 
   7   0  -5  366.52   17.83 
   7   0  -5  370.31   18.10 
  -7   0   5  362.78   18.81 
  -7   0   5  393.32   20.82 
   6   0  -5 1121.14   49.60 
   6   0  -5 1111.39   50.35 
   6   0  -5 1151.54   50.32 
  -6   0   5 1196.91   52.64 
  -6   0   5 1116.67   50.97 
   5   0  -5  353.67   16.88 
   5   0  -5  362.67   17.14 
  -5   0   5  365.77   19.07 
  -5   0   5  375.80   17.64 
   4   0  -5 1496.11   65.64 
   4   0  -5 1463.86   67.05 
   4   0  -5 1564.27   65.17 
   4   0  -5 1442.40   65.62 
  -4   0   5 1501.33   67.44 
  -4   0   5 1632.09   67.60 
  -4   0   5 1427.69   65.87 
   3   0  -5 1520.57   65.12 
   3   0  -5 1560.13   65.13 
   3   0  -5 1407.15   66.43 
   3   0  -5 1599.76   64.76 
  -3   0   5 1446.72   66.65 
  -3   0   5 1355.86   65.15 
  -3   0   5 1571.94   66.79 
   2   0  -5  308.87   15.13 
   2   0  -5  298.60   13.52 
   2   0  -5  279.35   13.56 
   2   0  -5  305.84   13.31 
  -2   0   5  295.86   15.09 
  -2   0   5  309.93   15.18 
  -2   0   5  266.65   13.52 
   1   0  -5 1487.76   64.15 
   1   0  -5 1359.65   63.99 
   1   0  -5 1543.35   64.08 
   1   0  -5 1601.37   64.37 
   1   0  -5 1550.56   65.60 
  -1   0   5 1431.49   65.47 
  -1   0   5 1460.36   65.43 
  -1   0   5 1398.00   64.01 
   0   0  -5  467.12   23.88 
   0   0  -5  469.04   23.00 
   0   0  -5  563.82   22.61 
   0   0  -5  540.10   22.90 
   0   0  -5  480.28   24.04 
   0   0   5  540.14   22.59 
   0   0   5  551.66   24.14 
  -1   0  -5  643.93   28.80 
  -1   0  -5  648.73   27.92 
  -1   0  -5  626.54   27.76 
  -1   0  -5  679.84   28.98 
  -1   0  -5  597.40   27.92 
   1   0   5  633.32   27.67 
   1   0   5  598.60   28.61 
  -2   0  -5  241.93   11.76 
  -2   0  -5  264.58   12.00 
  -2   0  -5  263.15   12.82 
  -2   0  -5  257.13   12.70 
  -2   0  -5  274.36   12.15 
   2   0   5  259.39   11.72 
   2   0   5  273.07   12.51 
  -3   0  -5 1166.21   50.82 
  -3   0  -5 1175.00   51.12 
  -3   0  -5 1227.54   50.48 
  -3   0  -5 1139.12   50.65 
  -3   0  -5 1145.11   51.19 
   3   0   5 1195.86   50.23 
   3   0   5 1139.76   50.59 
   3   0   5 1053.25   50.41 
   3   0   5 1233.31   50.25 
  -4   0  -5  727.19   34.15 
  -4   0  -5  765.92   34.47 
  -4   0  -5  784.20   34.00 
  -4   0  -5  801.33   34.41 
   4   0   5  815.73   34.00 
  -5   0  -5 1162.30   50.78 
  -5   0  -5 1148.93   50.72 
  -5   0  -5 1245.00   51.03 
  -5   0  -5 1138.92   50.64 
  -5   0  -5 1132.26   50.79 
  -6   0  -5  961.00   46.10 
  -6   0  -5 1089.93   46.14 
  -6   0  -5 1019.09   45.58 
  -6   0  -5 1117.46   46.05 
  -6   0  -5 1069.55   45.91 
  -6   0  -5 1048.30   45.75 
  -7   0  -5  463.75   21.86 
  -7   0  -5  494.13   22.64 
  -7   0  -5  510.40   22.45 
  -7   0  -5  534.01   22.51 
  -8   0  -5 1237.73   52.40 
  -8   0  -5 1104.72   50.95 
  -8   0  -5 1198.36   51.87 
  -8   0  -5 1222.08   51.90 
   8   0   5 1152.70   51.87 
  -9   0  -5  509.38   21.92 
  -9   0  -5  531.95   23.73 
  -9   0  -5  472.44   21.85 
   9   0   5  507.04   23.02 
   9   0   5  501.12   23.06 
 -10   0  -5  508.41   22.02 
  10   0   5  502.19   23.47 
  10   0   5  495.57   23.20 
  10   0   5  500.86   23.22 
  11   0   5  127.31    8.20 
  11   0   5  124.91    7.76 
  11   0   5  111.97    7.52 
  11   0   5  118.86    8.96 
   9  -1  -5  707.64   33.73 
   9  -1  -5  716.06   33.46 
  -9   1   5  757.08   36.74 
  -9   1   5  725.77   34.80 
   8  -1  -5  257.85   13.36 
   8  -1  -5  262.68   13.67 
  -8   1   5  252.64   15.96 
  -8   1   5  248.34   14.56 
   7  -1  -5  449.62   21.63 
   7  -1  -5  463.61   21.52 
  -7   1   5  471.50   23.98 
  -7   1   5  445.52   22.39 
   6  -1  -5  561.79   24.19 
   6  -1  -5  518.25   24.74 
   6  -1  -5  554.66   24.88 
  -6   1   5  591.20   27.42 
  -6   1   5  483.94   25.39 
   5  -1  -5 1048.70   44.26 
   5  -1  -5 1016.74   44.76 
   5  -1  -5  996.95   44.69 
  -5   1   5  998.18   45.25 
  -5   1   5 1000.46   46.56 
   4  -1  -5  161.84   10.29 
   4  -1  -5  175.82    9.02 
   4  -1  -5  172.47    8.88 
   4  -1  -5  179.78    8.46 
  -4   1   5  188.02    9.43 
  -4   1   5  189.11   10.86 
  -4   1   5  164.61   10.56 
   3  -1  -5   80.80    4.68 
   3  -1  -5   68.89    4.33 
   3  -1  -5   69.67    5.94 
   3  -1  -5   70.88    3.95 
  -3   1   5   58.16    5.87 
  -3   1   5   69.19    6.01 
  -3   1   5   72.04    4.38 
   2  -1  -5  596.57   27.76 
   2  -1  -5  585.51   27.61 
   2  -1  -5  659.87   27.61 
   2  -1  -5  573.56   29.13 
  -2   1   5  618.55   29.08 
  -2   1   5  645.61   29.35 
  -2   1   5  705.12   27.94 
   1  -1  -5   24.69    2.01 
   1  -1  -5   19.71    2.49 
   1  -1  -5   26.89    3.95 
   1  -1  -5   19.51    2.11 
   1  -1  -5   18.14    1.79 
  -1   1   5   21.47    3.48 
  -1   1   5   23.31    3.59 
   0  -1  -5  757.93   35.33 
   0  -1  -5  785.78   34.20 
   0  -1  -5  786.21   34.32 
   0  -1  -5  809.12   34.04 
   0  -1  -5  716.64   33.92 
   0  -1  -5  744.87   35.18 
   0   1   5  774.42   33.90 
   0   1   5  858.56   35.39 
   0   1   5  786.63   33.91 
  -1  -1  -5  734.06   34.50 
  -1  -1  -5  820.70   34.72 
  -1  -1  -5  729.21   33.27 
  -1  -1  -5  761.09   33.42 
  -1  -1  -5  780.00   33.73 
  -1  -1  -5  745.69   33.73 
   1   1   5  789.10   33.34 
   1   1   5  817.05   34.58 
   1   1   5  737.97   33.17 
  -2  -1  -5 1116.47   49.89 
  -2  -1  -5 1128.72   49.80 
  -2  -1  -5 1154.51   50.50 
  -2  -1  -5 1163.17   50.53 
   2   1   5 1144.03   49.27 
   2   1   5 1155.56   49.43 
  -3  -1  -5  353.24   16.20 
  -3  -1  -5  339.46   15.60 
  -3  -1  -5  350.45   16.46 
  -3  -1  -5  370.65   16.01 
  -3  -1  -5  351.27   16.49 
   3   1   5  367.24   15.62 
   3   1   5  361.80   15.65 
   3   1   5  363.80   15.62 
   3   1   5  342.45   15.97 
  -4  -1  -5 3245.78  141.14 
  -4  -1  -5 3220.57  141.37 
  -4  -1  -5 3540.53  140.92 
  -4  -1  -5 3137.22  141.40 
   4   1   5 3286.59  141.03 
   4   1   5 3067.19  140.88 
   4   1   5 3416.00  141.01 
  -5  -1  -5  785.69   31.87 
  -5  -1  -5  733.76   31.84 
  -5  -1  -5  713.38   31.77 
  -5  -1  -5  737.61   31.63 
  -5  -1  -5  640.23   31.98 
   5   1   5  728.20   31.83 
  -6  -1  -5  848.17   36.51 
  -6  -1  -5  827.71   36.70 
  -6  -1  -5  793.49   36.51 
  -6  -1  -5  862.17   37.12 
  -6  -1  -5  863.48   36.84 
   6   1   5  838.91   37.03 
  -7  -1  -5  943.80   38.39 
  -7  -1  -5  865.39   38.99 
  -7  -1  -5  821.27   39.14 
  -7  -1  -5  886.60   38.94 
   7   1   5  904.01   39.38 
  -8  -1  -5  682.92   32.90 
  -8  -1  -5  758.15   33.18 
   8   1   5  750.64   33.55 
   8   1   5  779.78   33.11 
   9   1   5   78.34    5.38 
   9   1   5   73.04    6.04 
   9   1   5   62.23    4.95 
   9   1   5   77.51    5.21 
  10   1   5  118.04    8.47 
  10   1   5  123.20    7.33 
  10   1   5  127.69    7.74 
  10   1   5  133.00    7.46 
  11   1   5  193.46   11.70 
  11   1   5  178.02   10.59 
  11   1   5  196.38   10.23 
   9  -2  -5  166.58    9.97 
   9  -2  -5  152.98   10.08 
  -9   2   5  147.21   12.41 
  -9   2   5  144.39   10.28 
   8  -2  -5  329.24   16.11 
   8  -2  -5  305.55   15.77 
  -8   2   5  320.84   17.26 
  -8   2   5  316.56   19.02 
   7  -2  -5  497.86   23.54 
   7  -2  -5  489.69   23.46 
  -7   2   5  516.87   25.99 
  -7   2   5  526.84   24.43 
   6  -2  -5   19.71    3.32 
   6  -2  -5   21.79    3.19 
   6  -2  -5   32.43    3.44 
  -6   2   5   18.31    4.64 
  -6   2   5   16.50    3.91 
   5  -2  -5  238.82   12.65 
   5  -2  -5  267.79   12.63 
   5  -2  -5  255.32   12.21 
  -5   2   5  258.73   13.12 
  -5   2   5  285.97   15.19 
   4  -2  -5  199.32   10.17 
   4  -2  -5  221.33   10.23 
   4  -2  -5  204.59    9.89 
   4  -2  -5  190.84   11.98 
  -4   2   5  216.43   12.16 
  -4   2   5  205.93   10.54 
  -4   2   5  217.03   12.31 
   3  -2  -5  170.58    8.52 
   3  -2  -5  162.11   10.07 
   3  -2  -5  155.62    8.06 
   3  -2  -5  169.89    8.16 
  -3   2   5  166.74    9.68 
  -3   2   5  161.18   10.07 
  -3   2   5  189.22    8.86 
   2  -2  -5  493.71   24.02 
   2  -2  -5  514.42   23.89 
   2  -2  -5  590.89   25.88 
   2  -2  -5  508.80   23.80 
  -2   2   5  585.17   25.55 
  -2   2   5  572.63   24.19 
  -2   2   5  509.90   25.42 
   1  -2  -5 1065.75   49.44 
   1  -2  -5 1143.33   49.20 
   1  -2  -5 1179.68   50.87 
   1  -2  -5 1118.58   49.41 
  -1   2   5 1139.65   50.63 
  -1   2   5 1155.31   49.44 
   0  -2  -5  757.25   32.16 
   0  -2  -5  728.56   32.49 
   0  -2  -5  762.05   33.58 
   0  -2  -5  658.01   32.33 
   0  -2  -5  808.20   33.82 
   0  -2  -5  715.07   32.48 
   0   2   5  766.43   32.29
[truncated: 6,362,205 more chars]
